# Supplementary material
Source: publisher figshare collection journal article supplement (https://gsajournals.figshare.com/articles/dataset/_/22540894)

# Alignments of Chromosome Sequences Between European and N.A. Atlantic Salmon

**N.A. Atlantic salmon genome assembly (USDA\_NASsal\_1.1; GCA\_021399835.1)**

**European lineage reference genome assembly (Ssal\_v3.1; GCA\_905237065.2)**

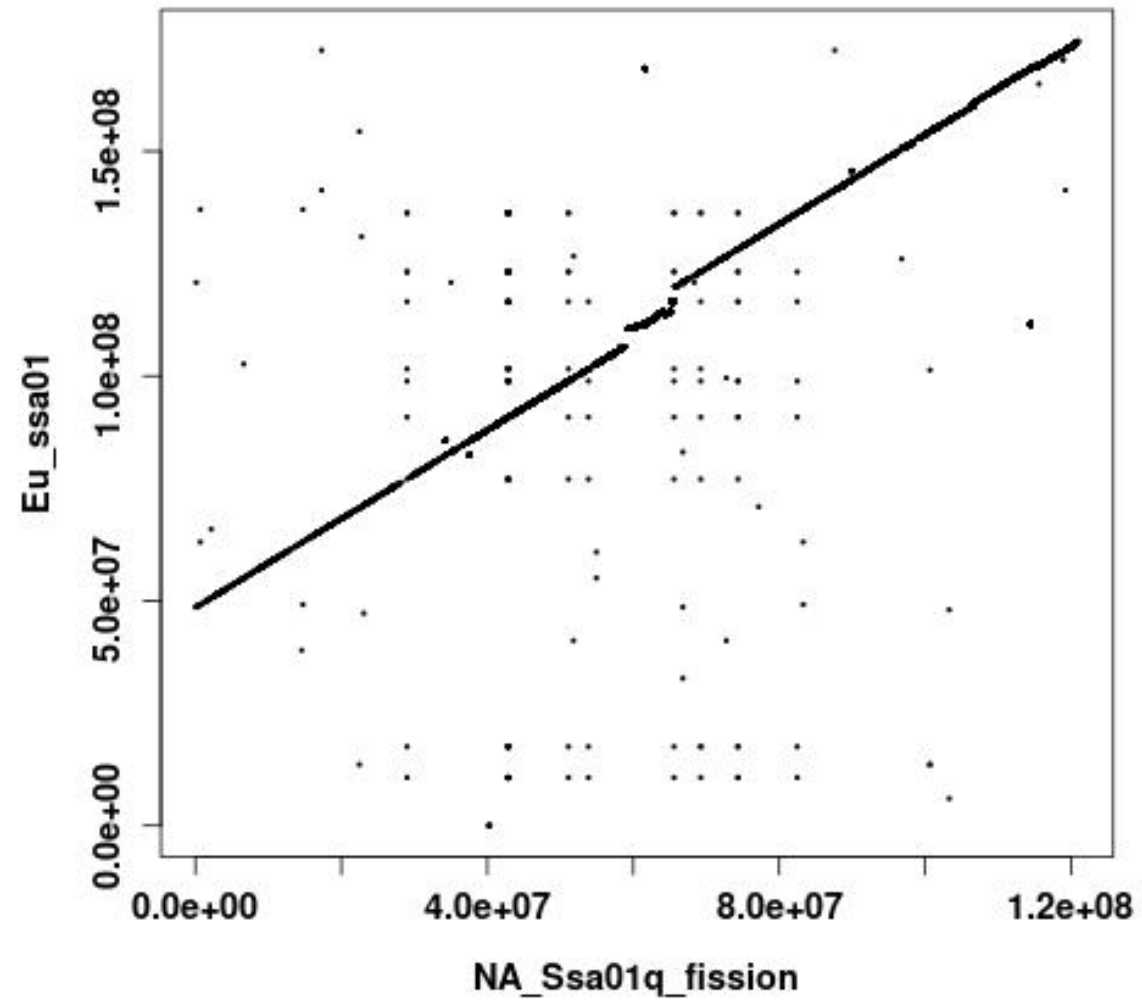

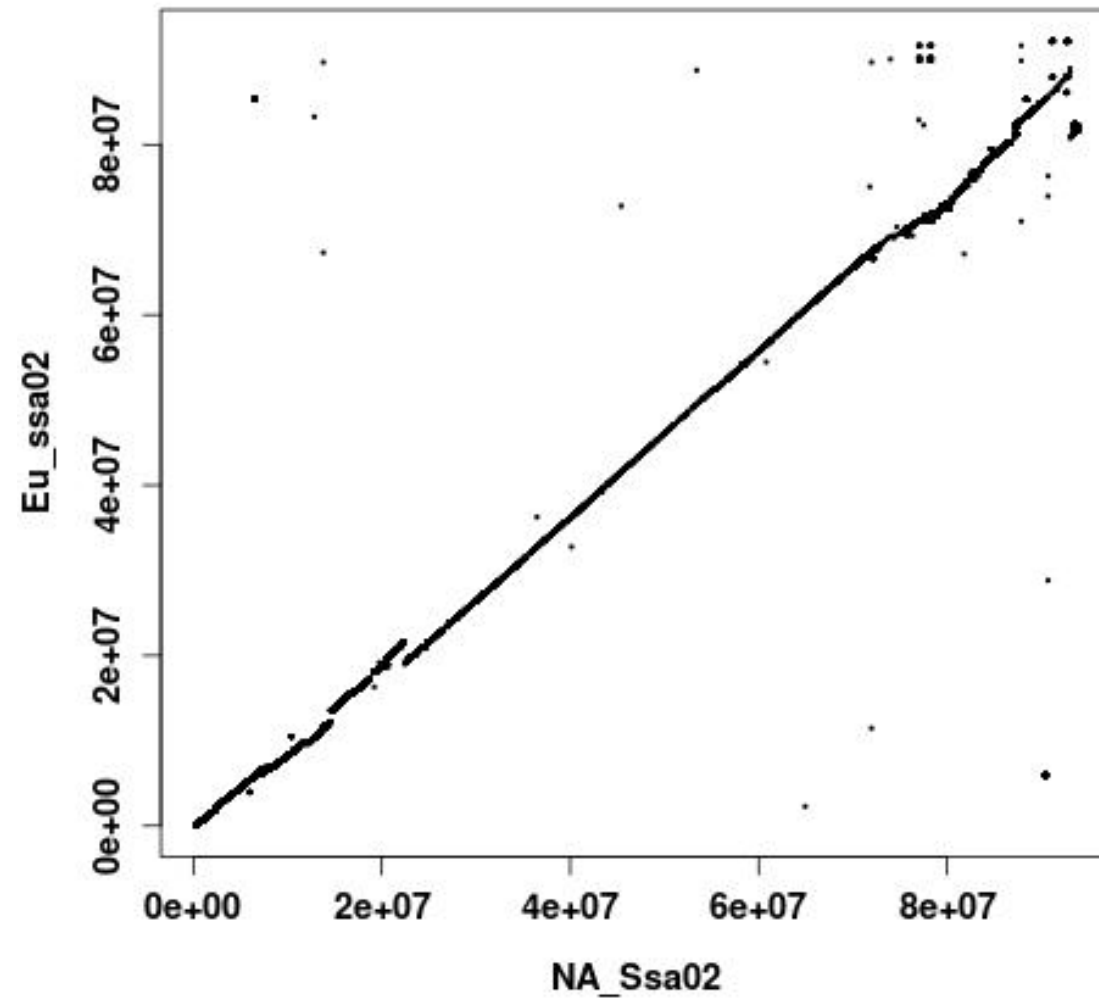

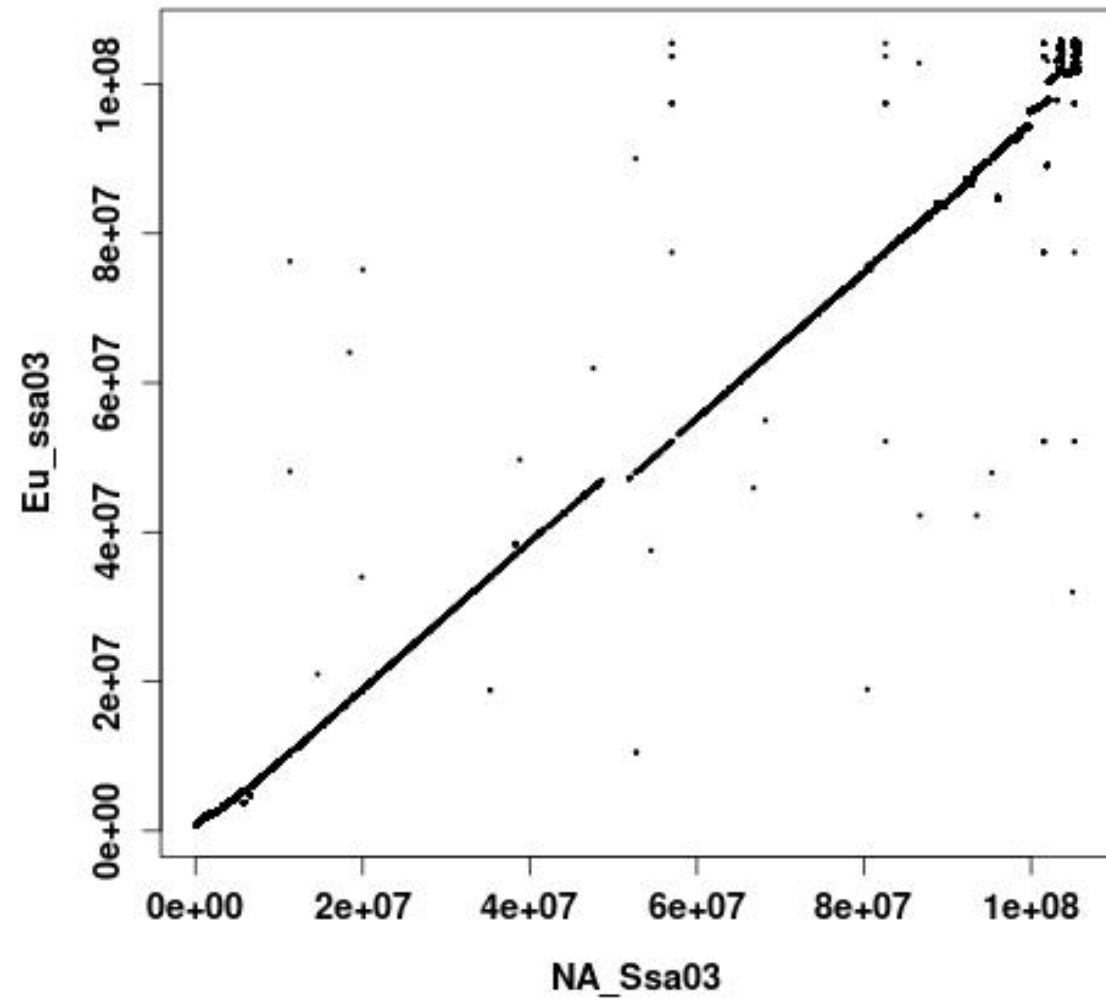

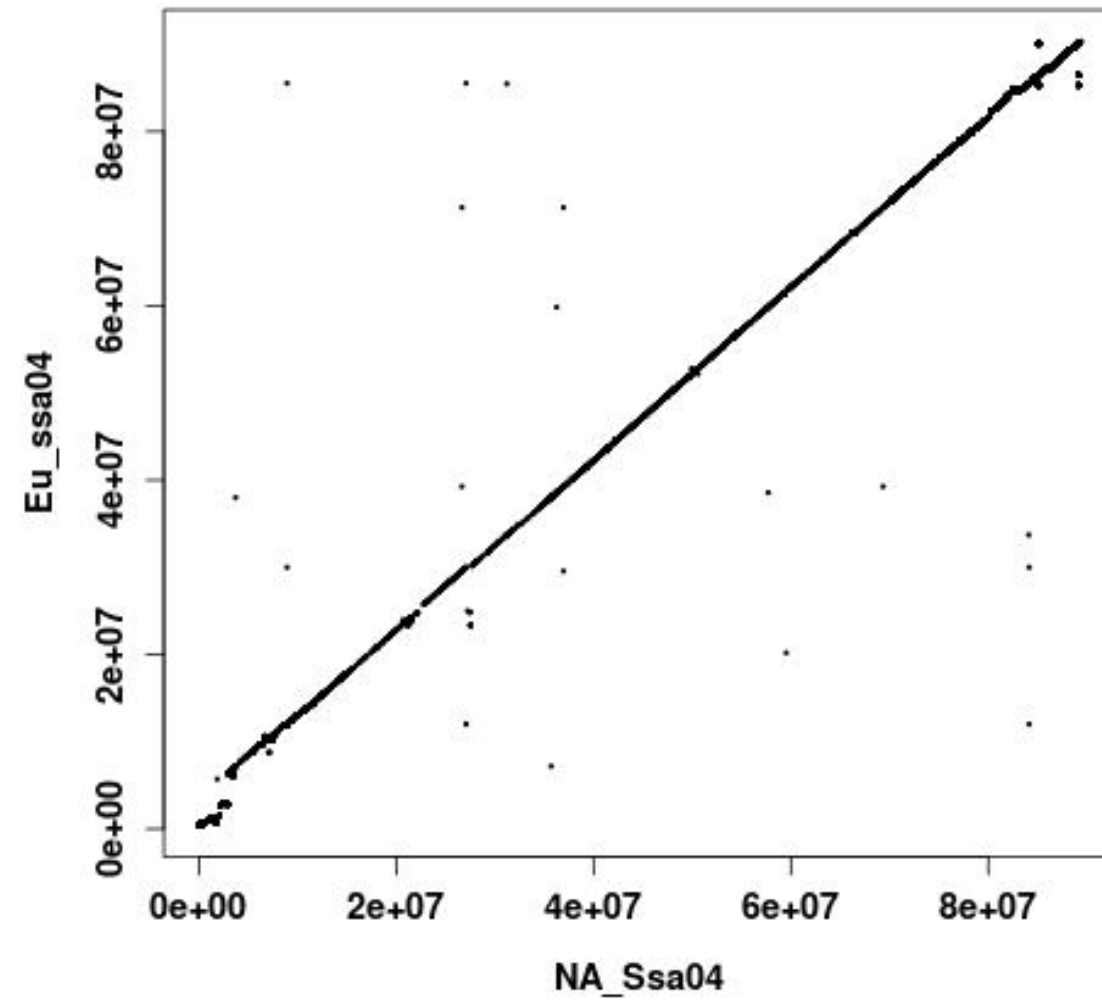

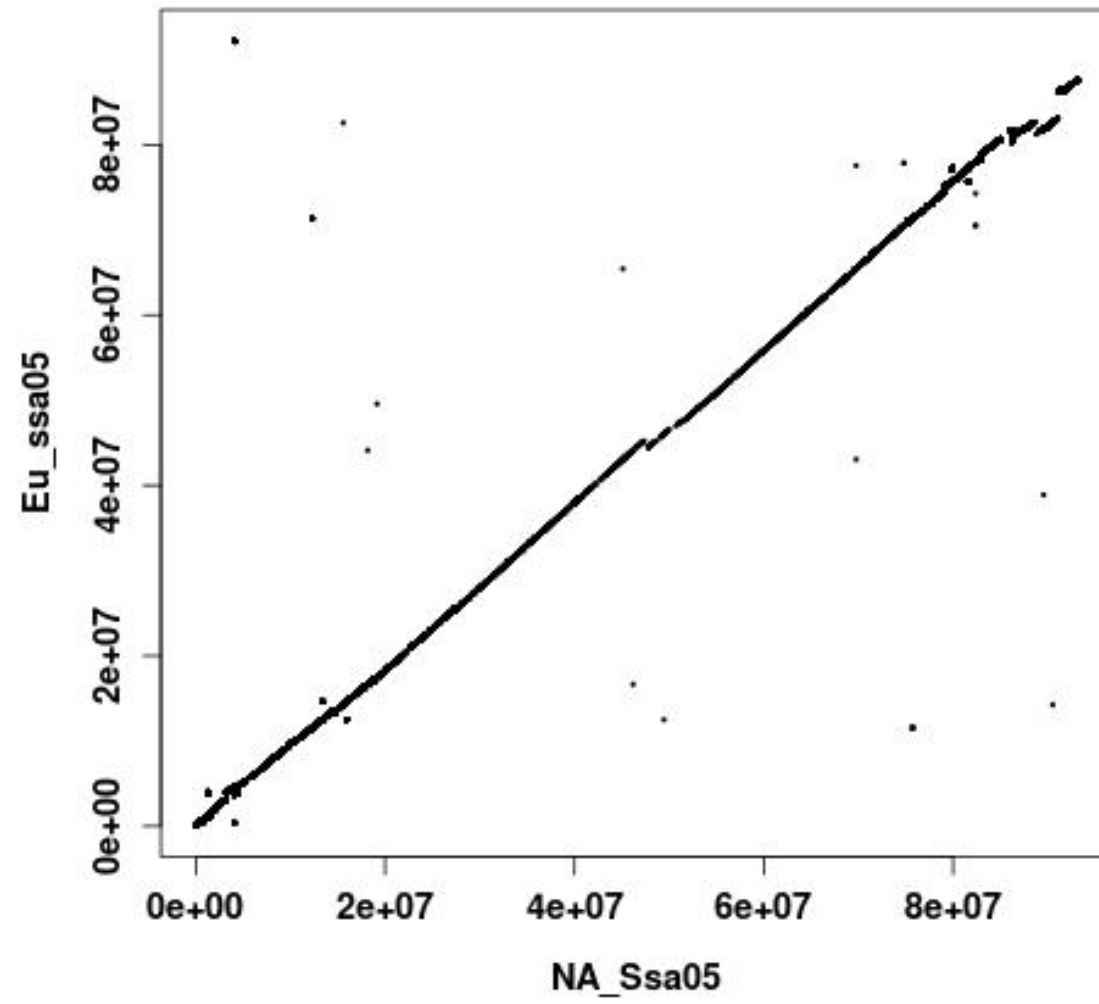

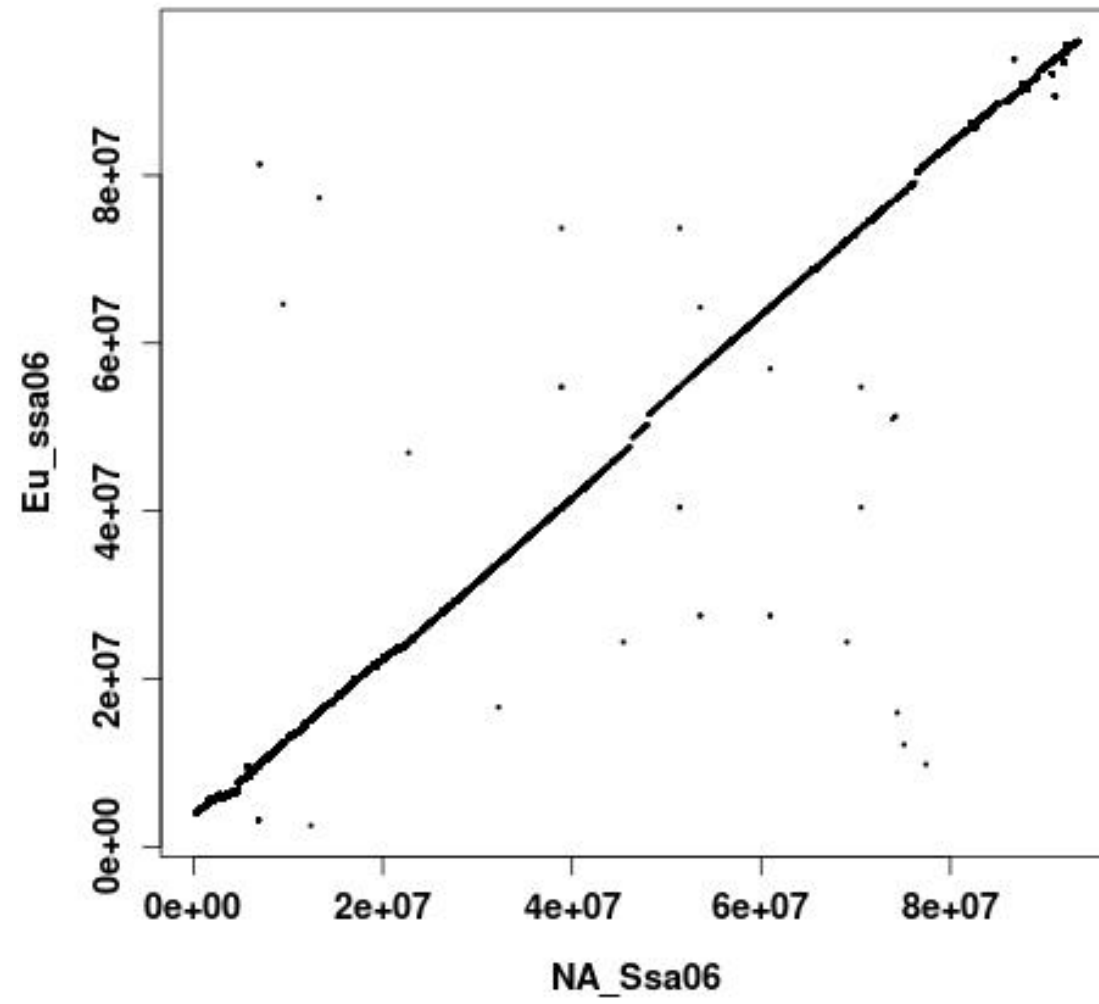

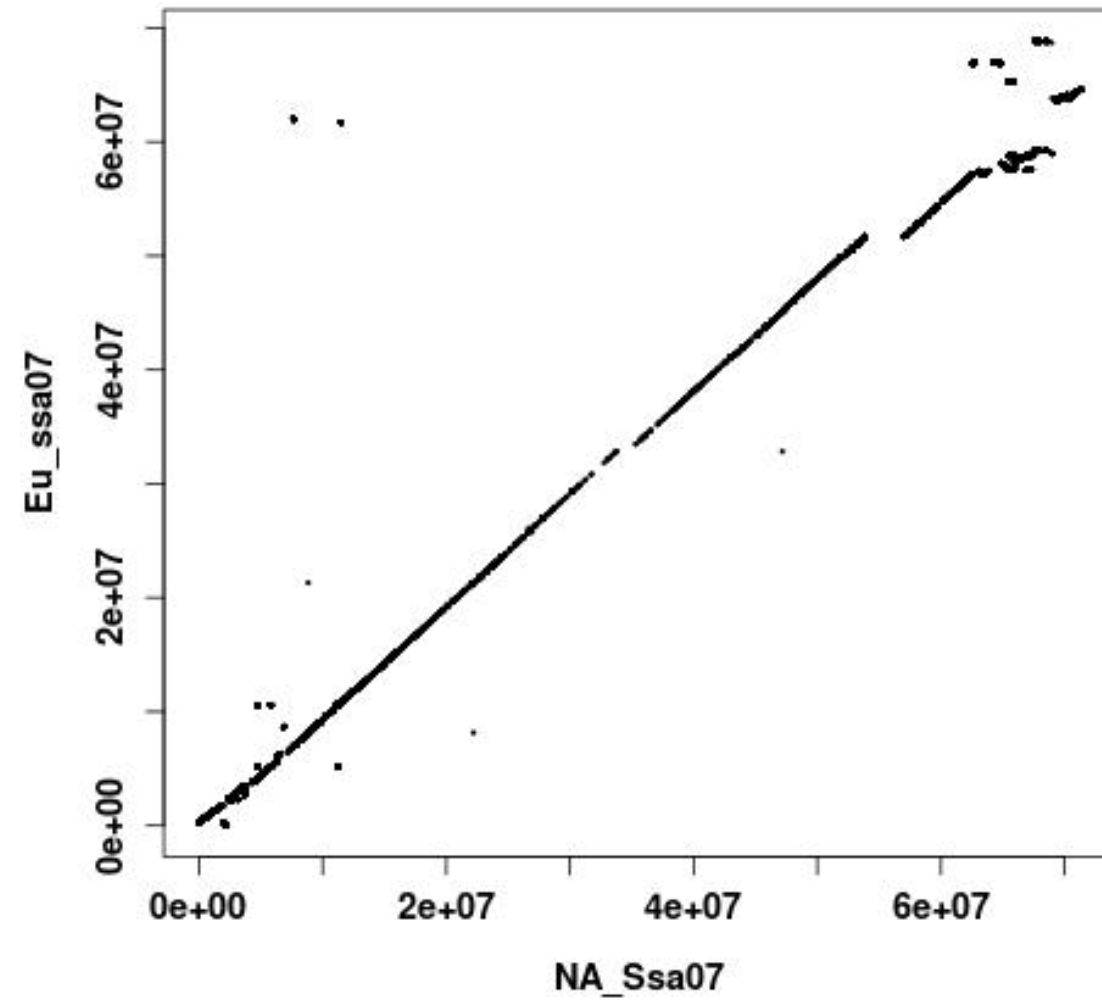



# Chr. 8: Ssa08\_Ssa29

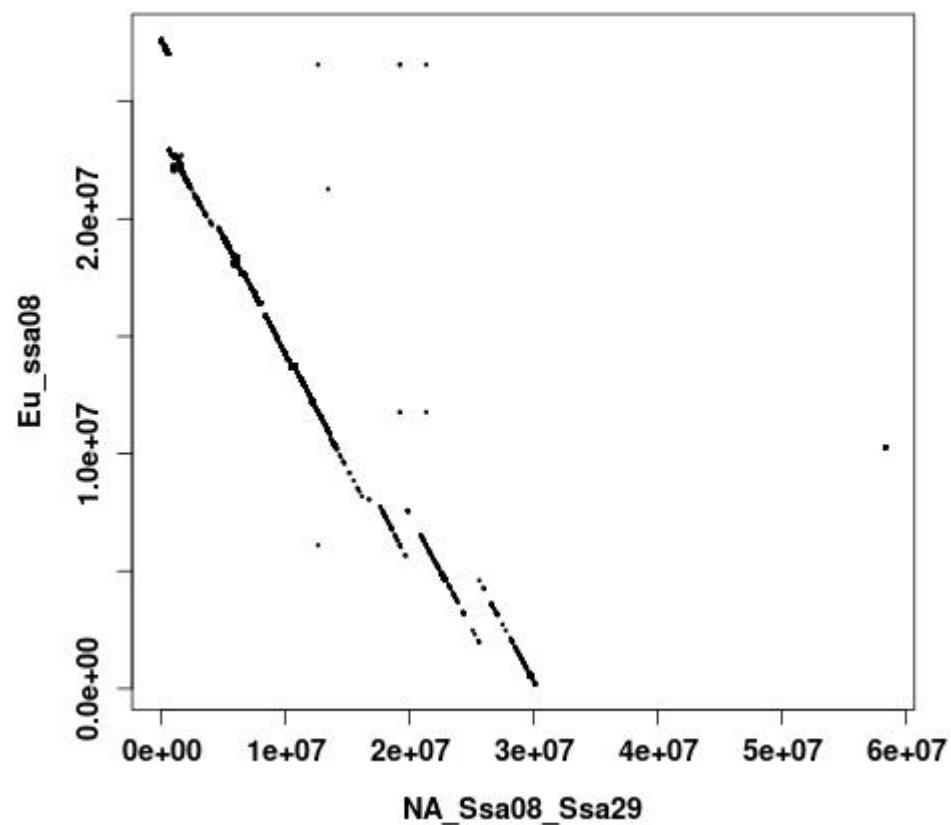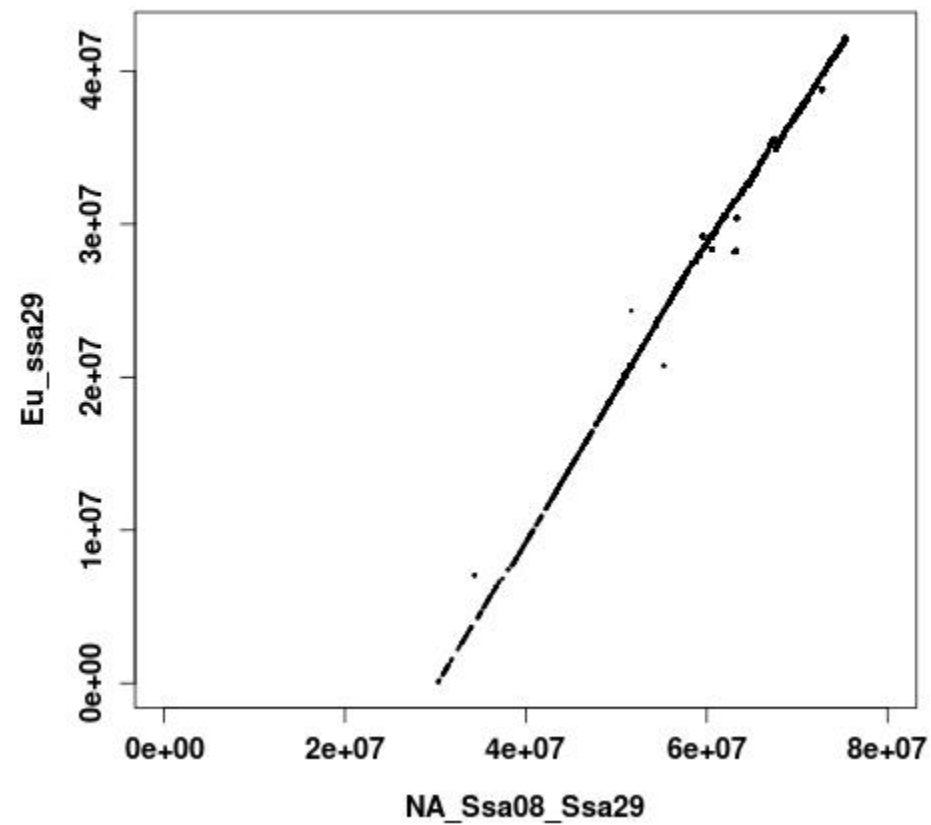

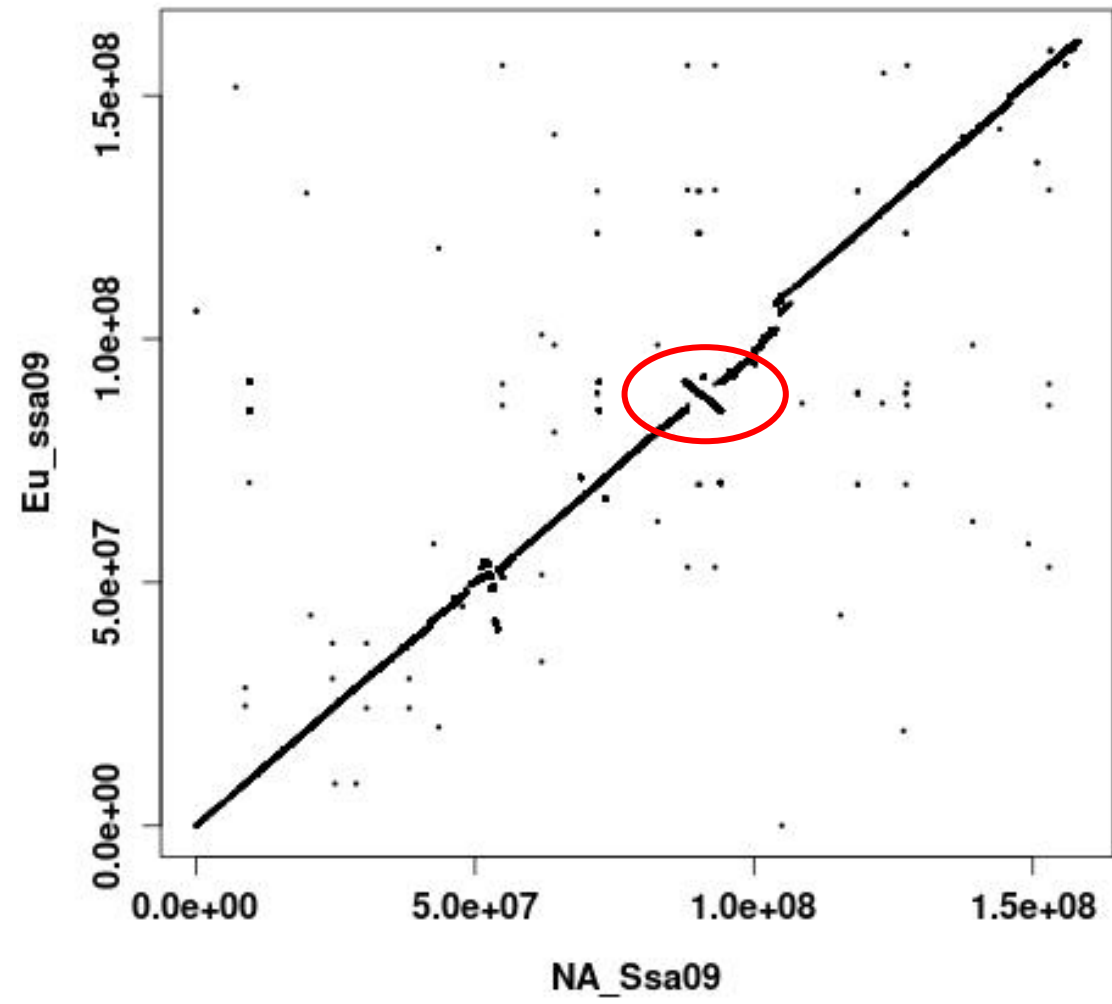

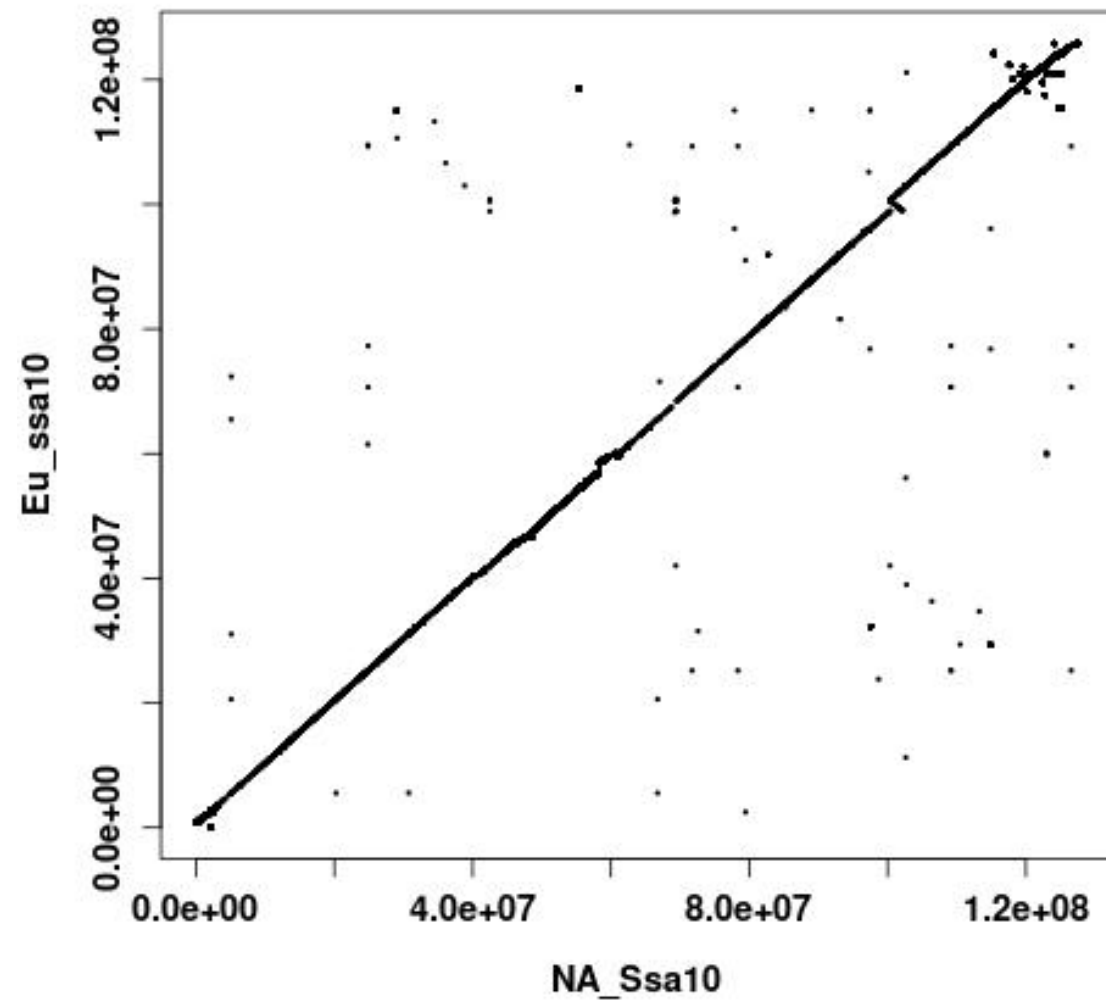

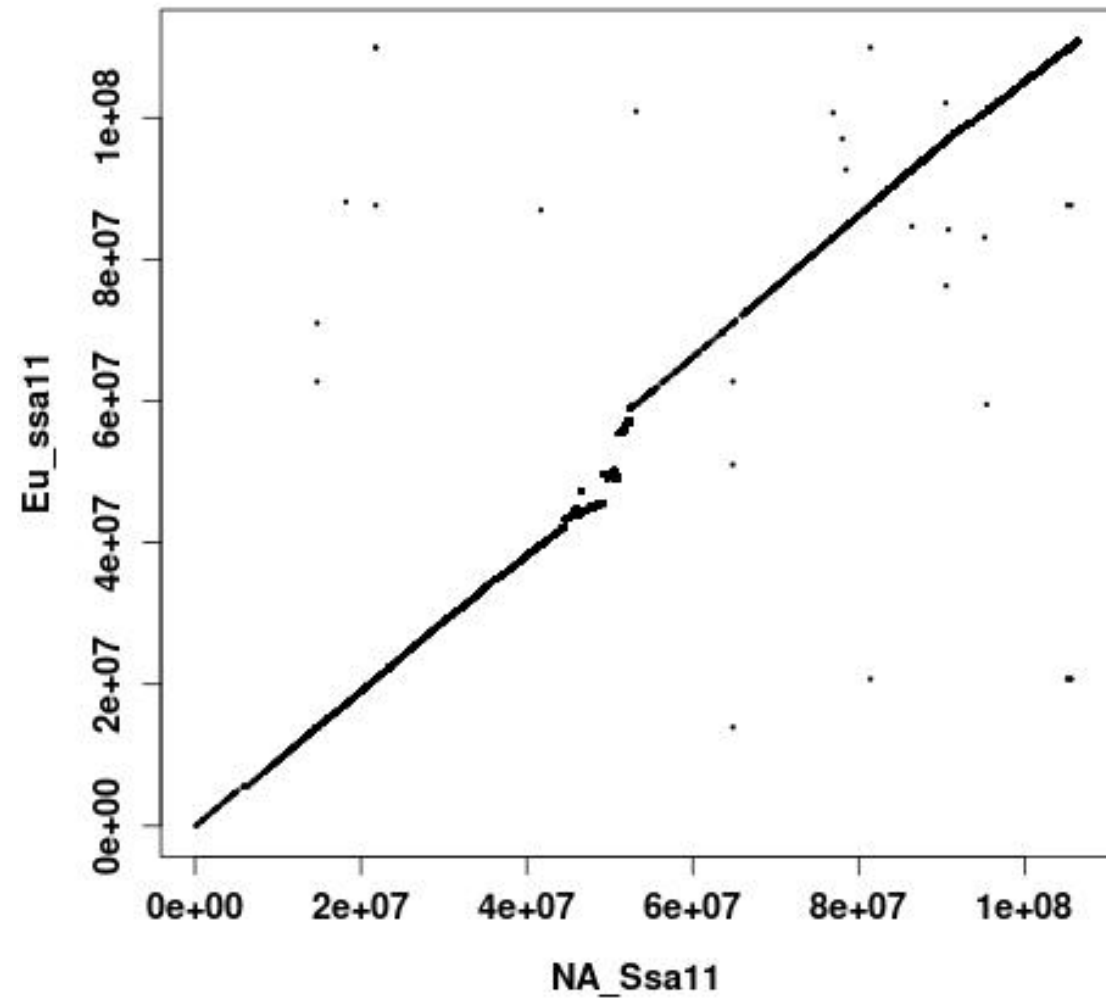

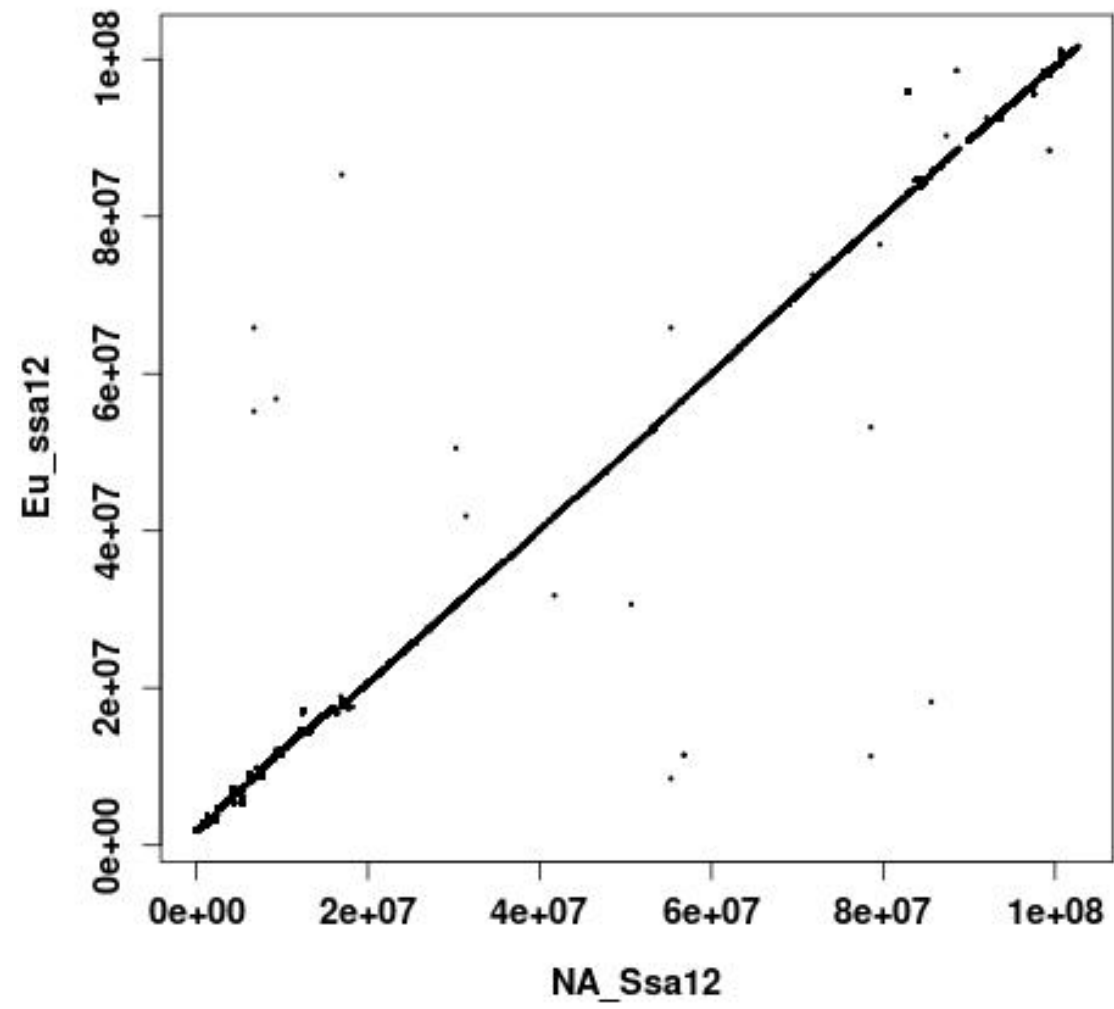

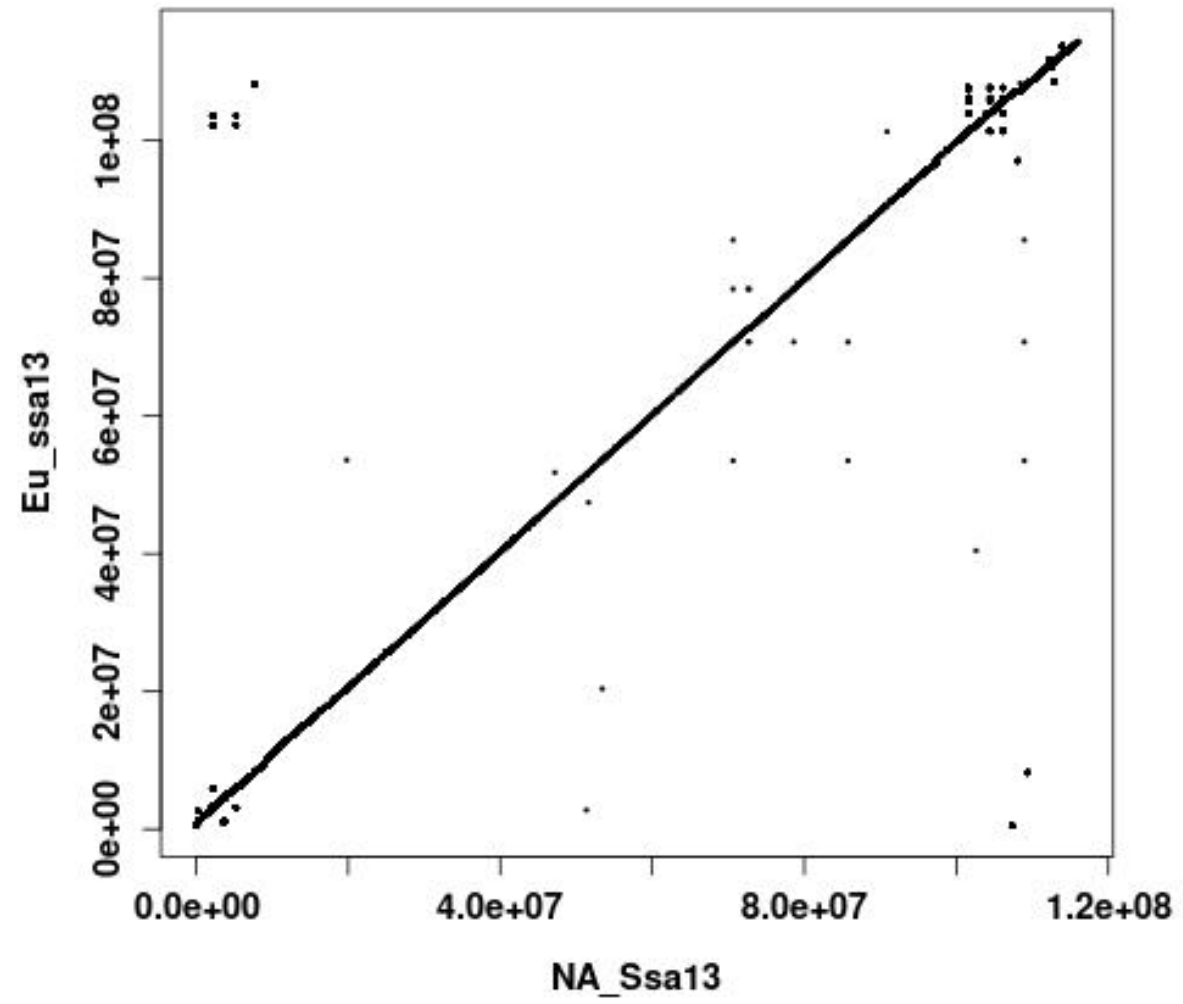

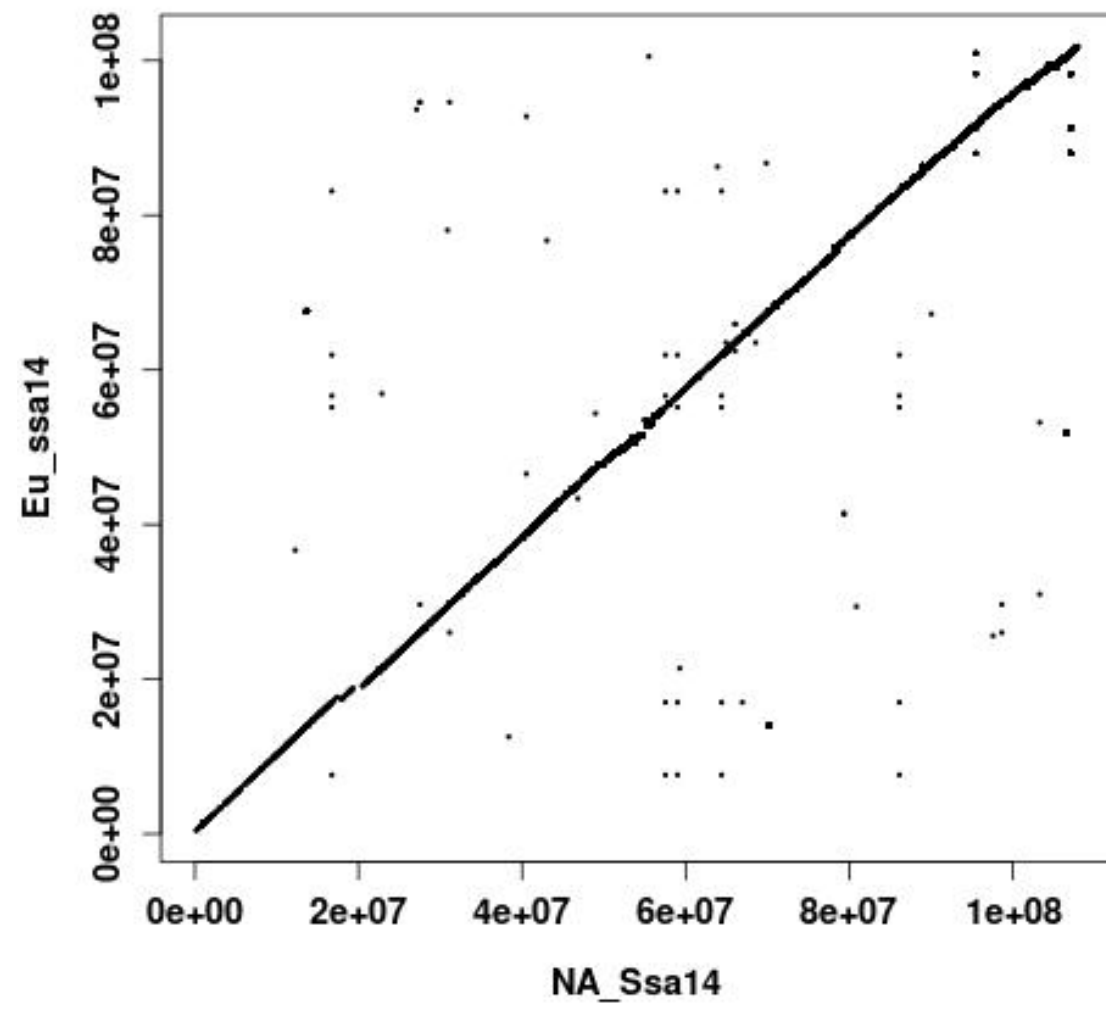

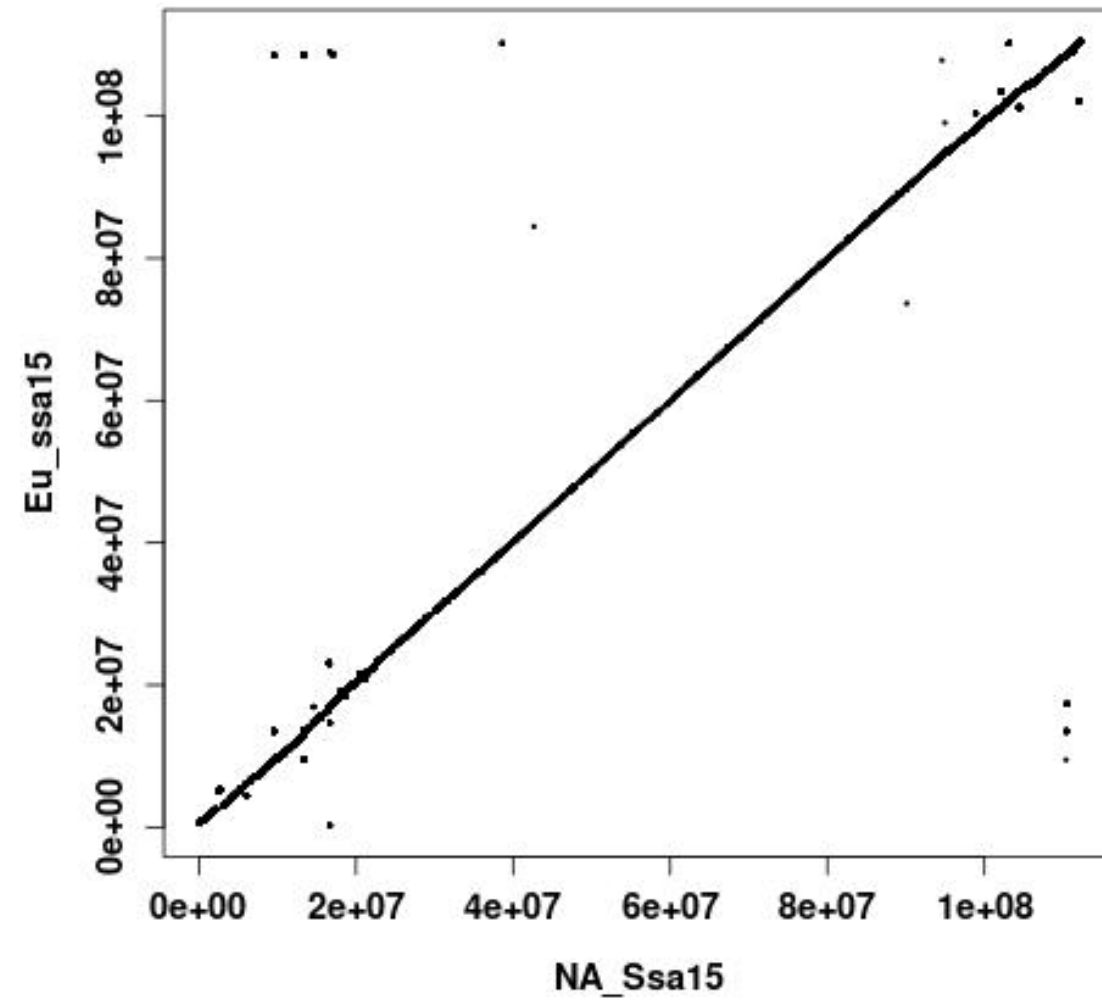



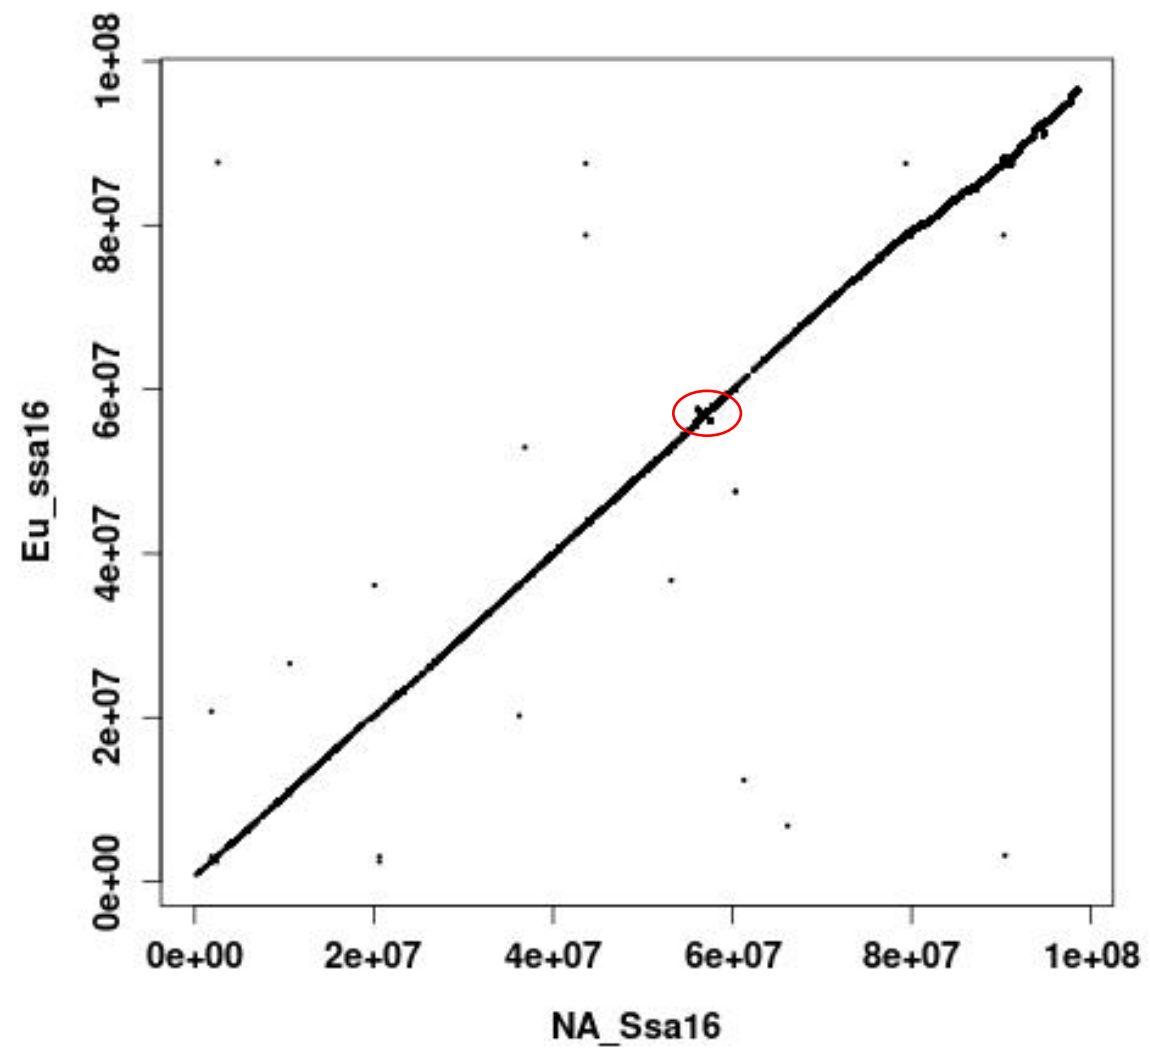

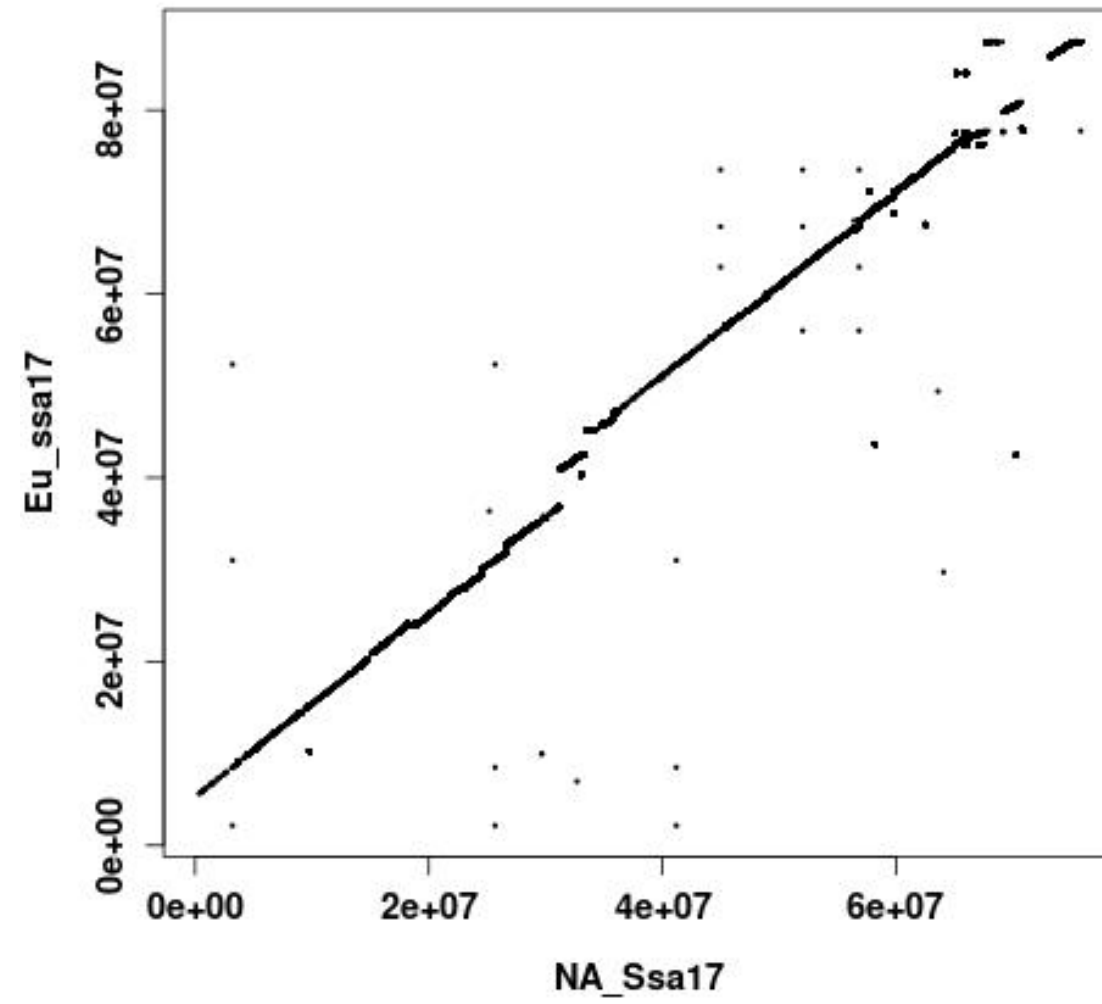

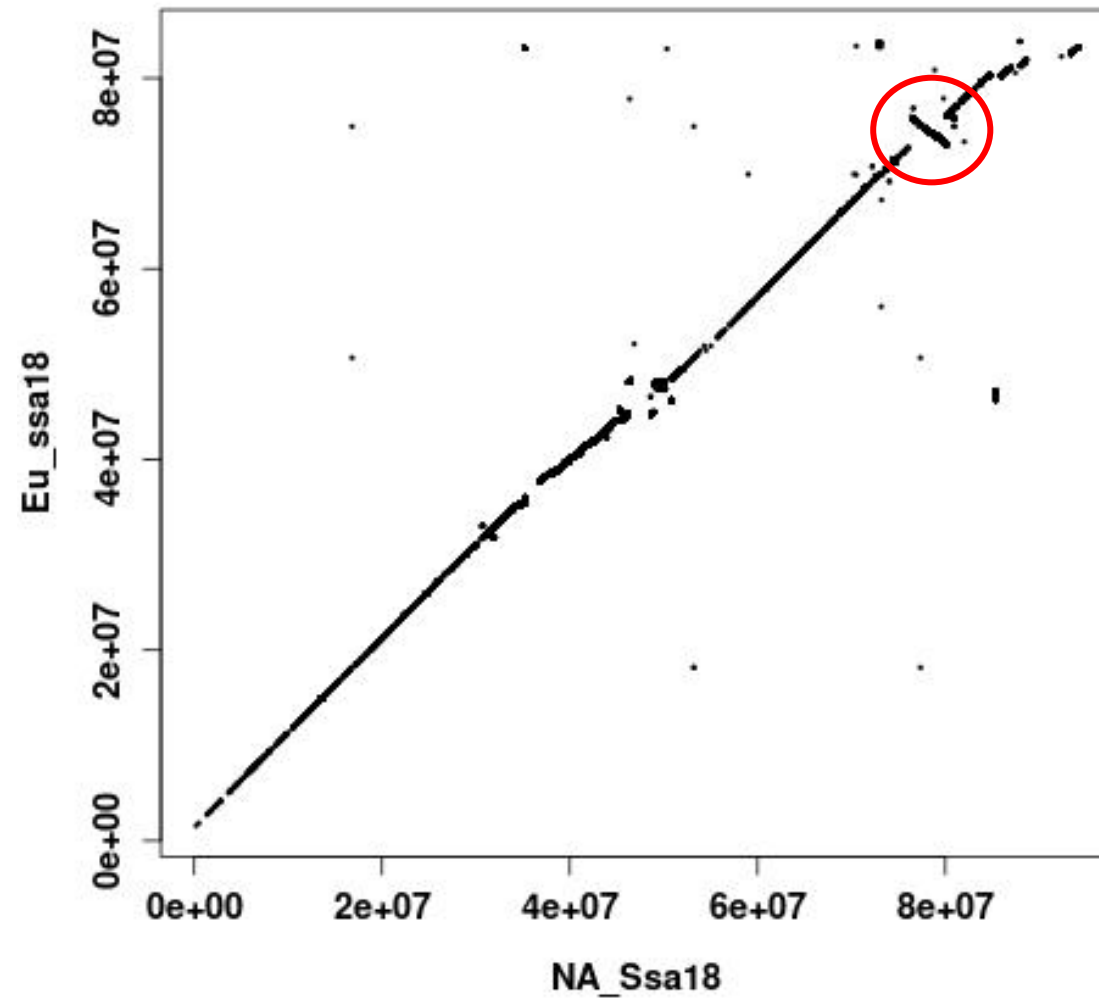

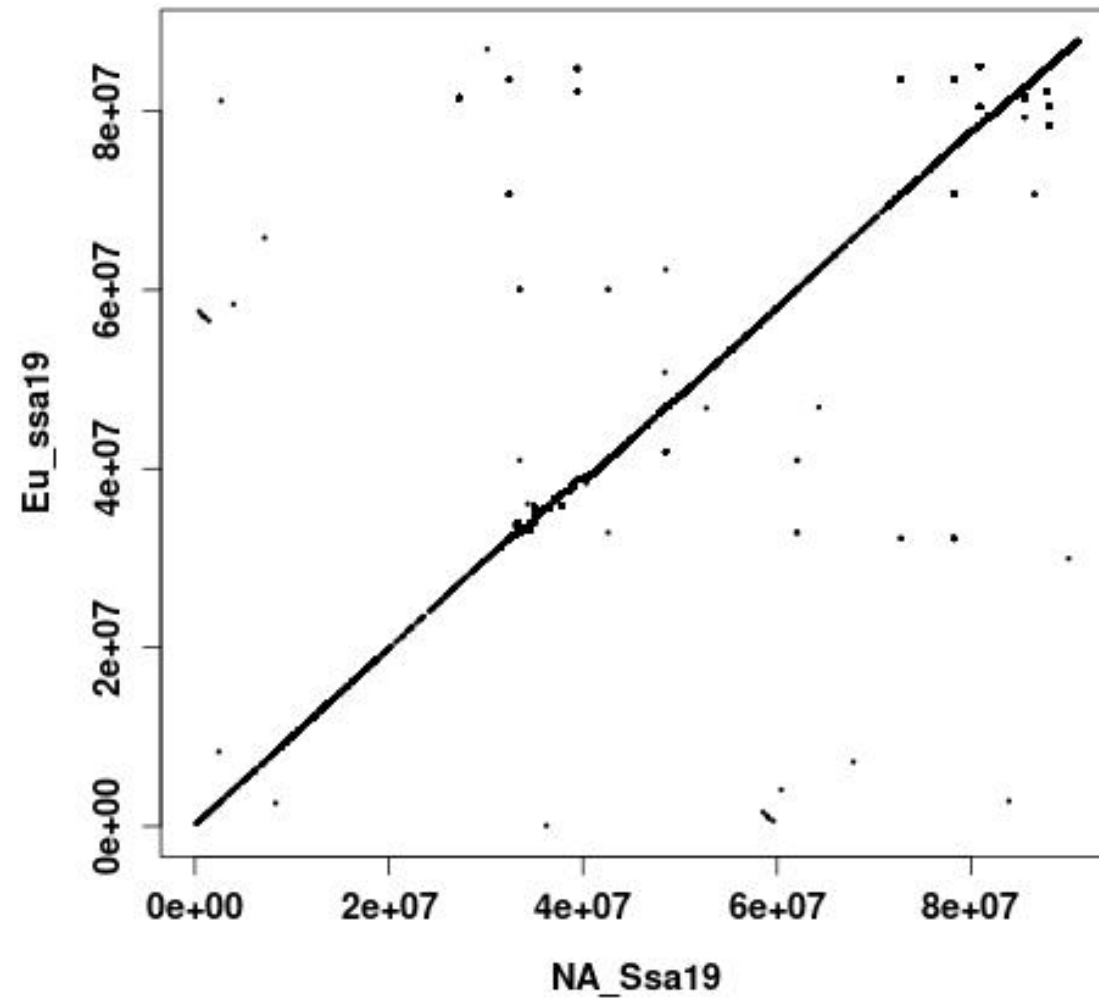

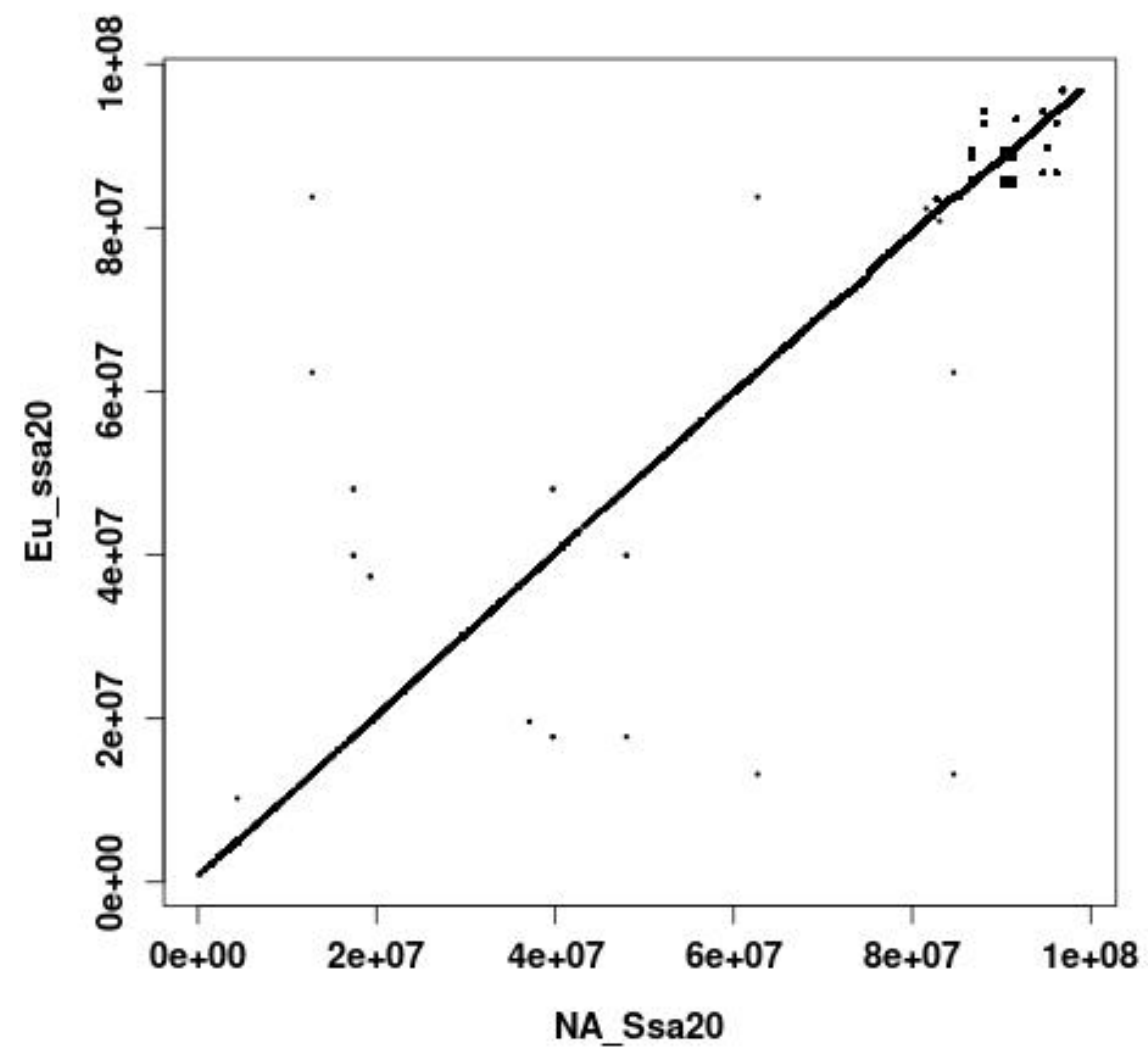

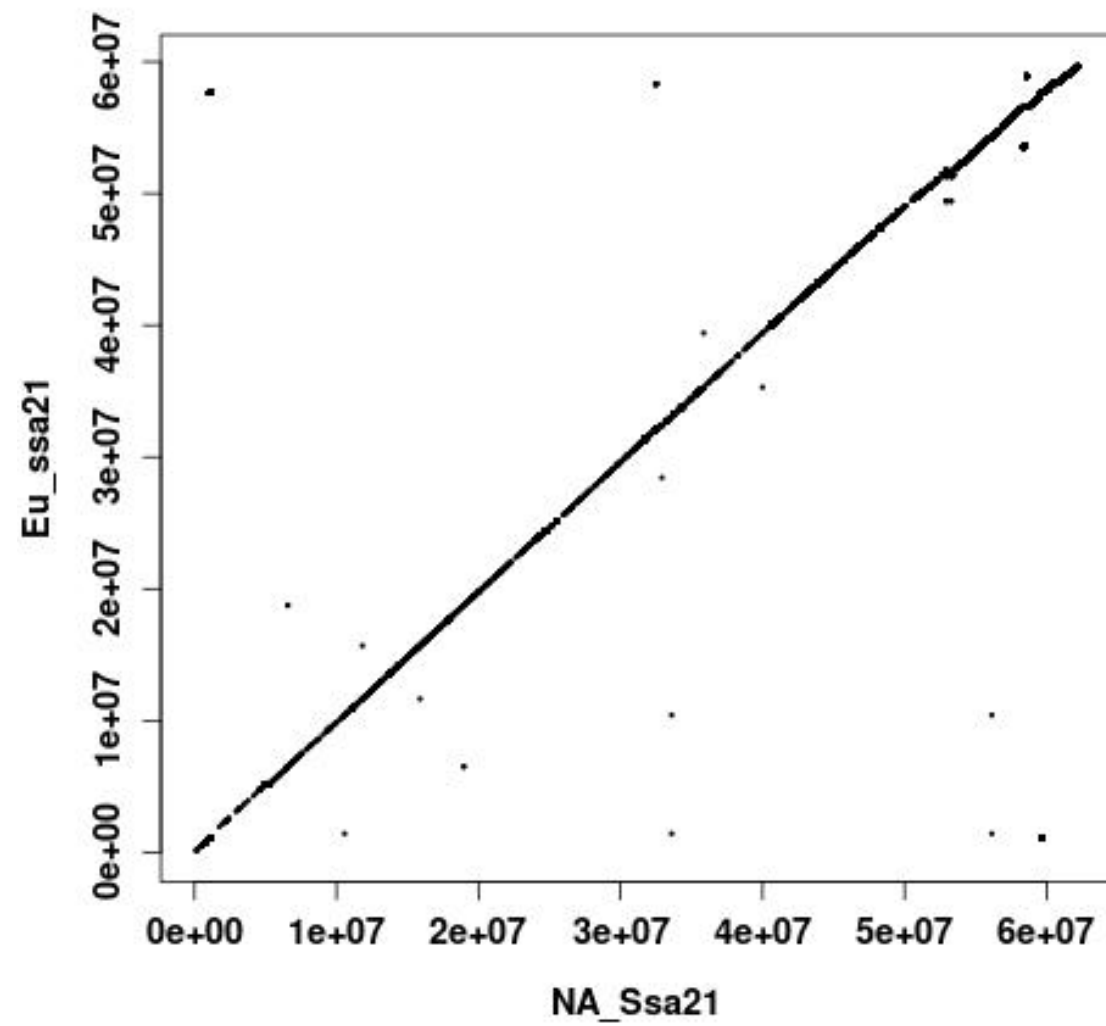

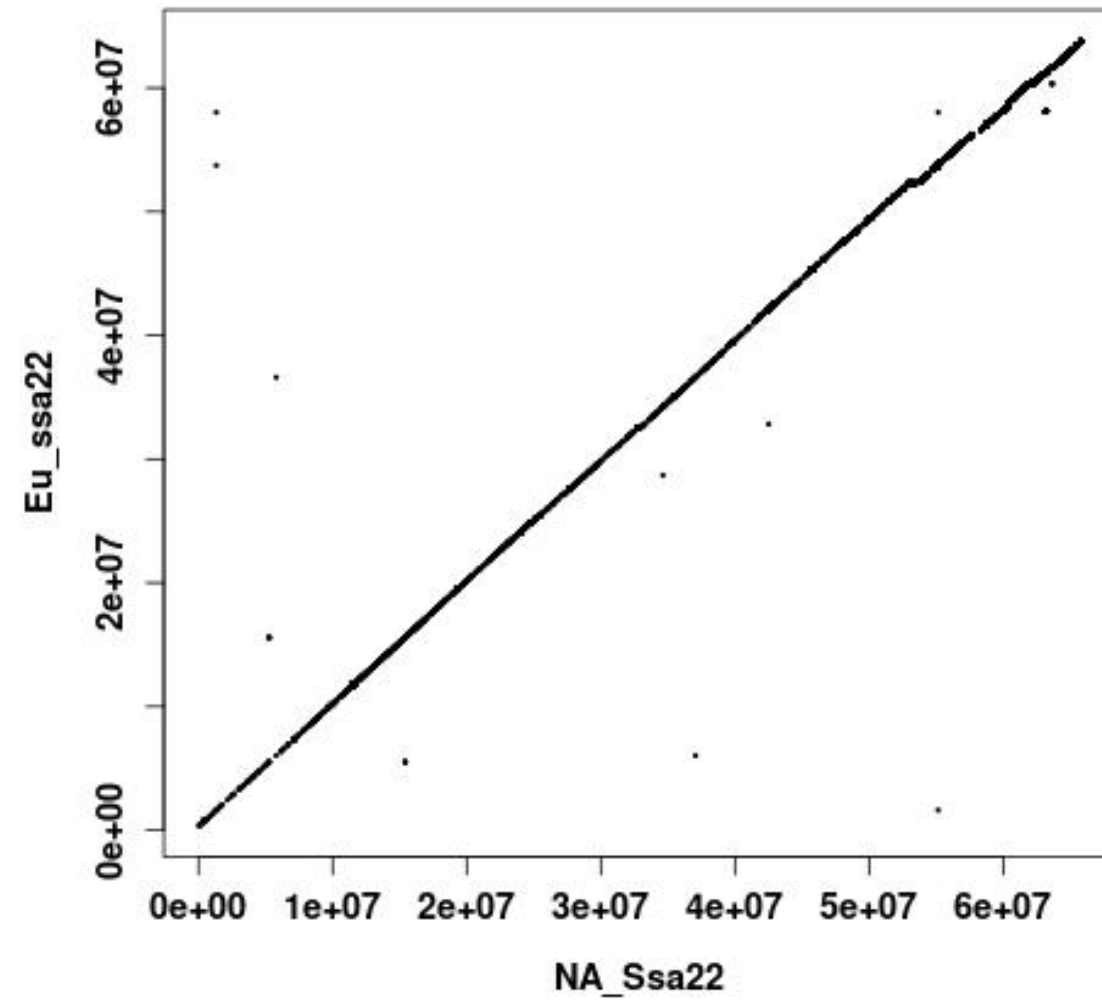

# Chr. 23: Ssa01p\_Ssa23

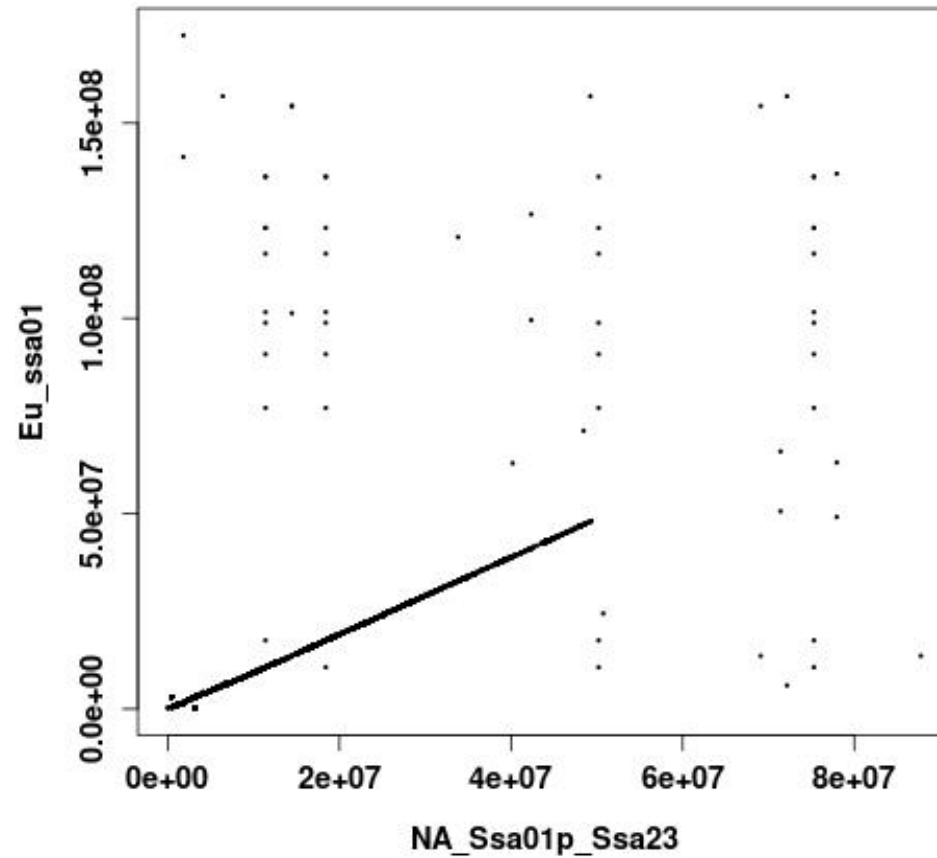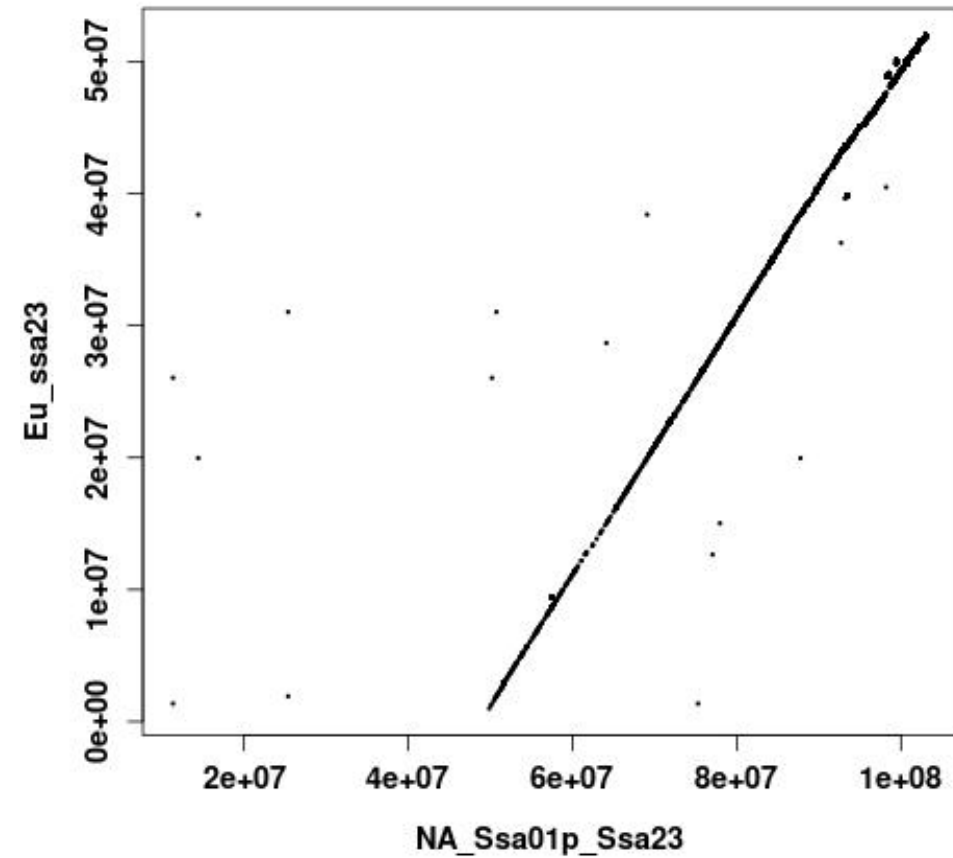



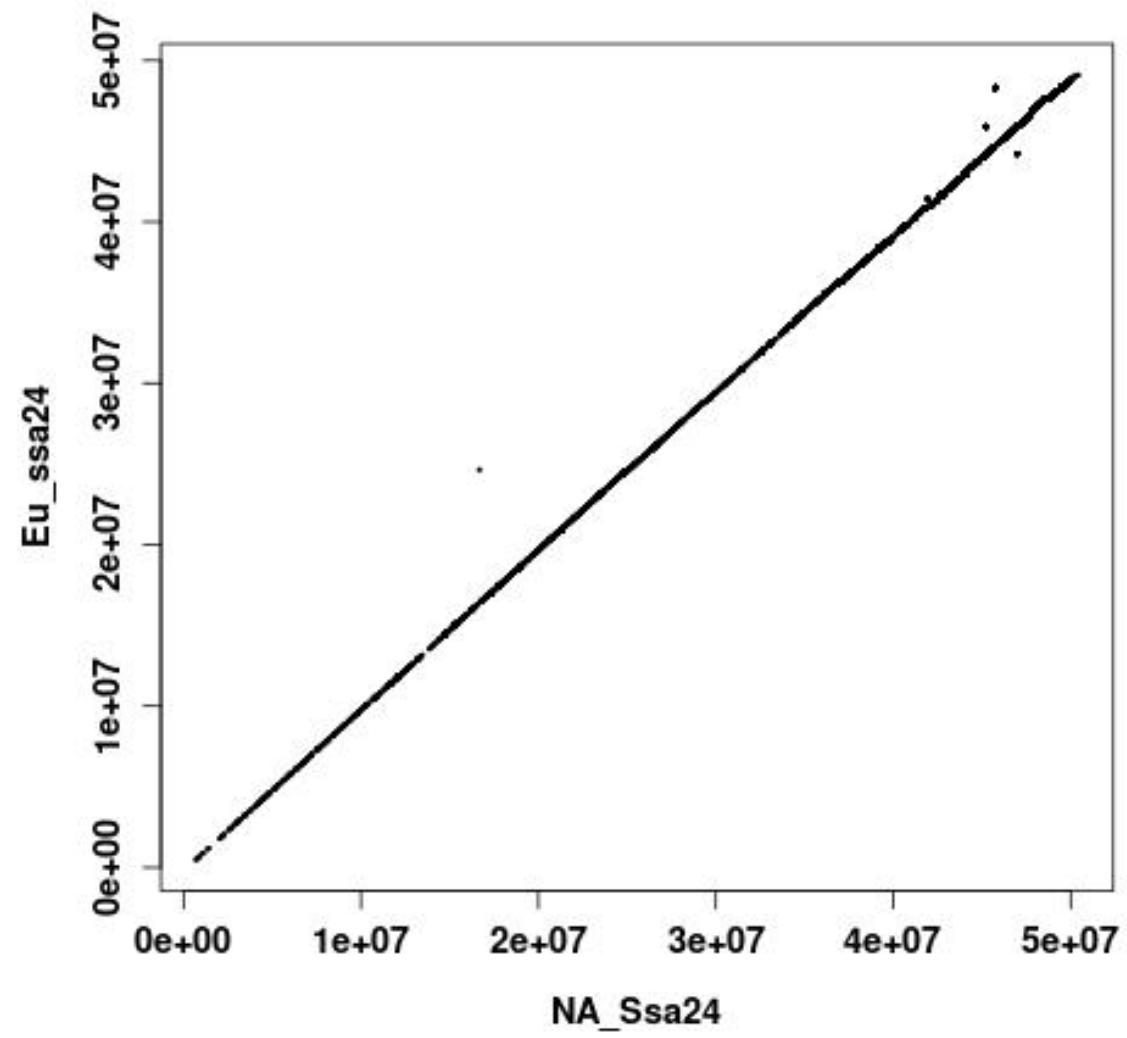

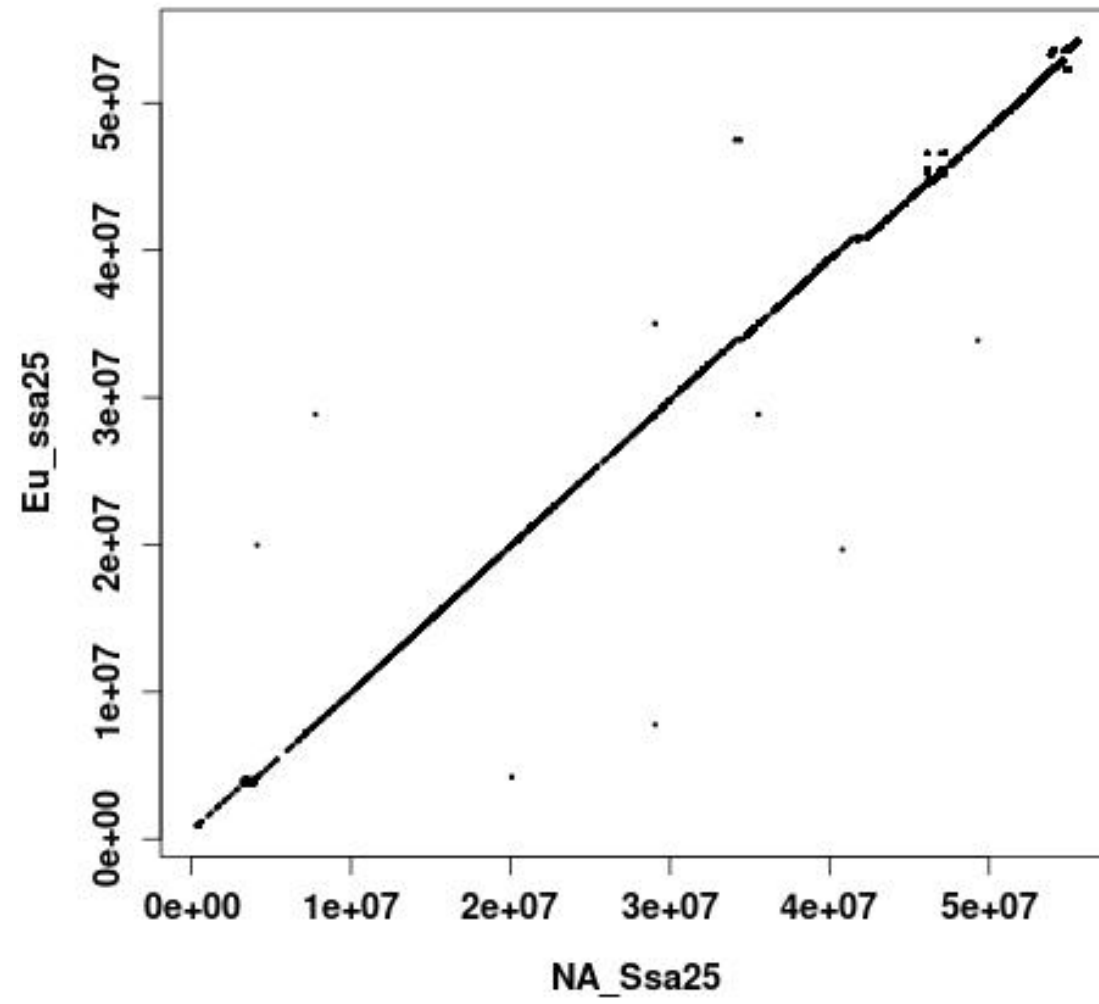

# Chr. 26: Ssa26\_Ssa28

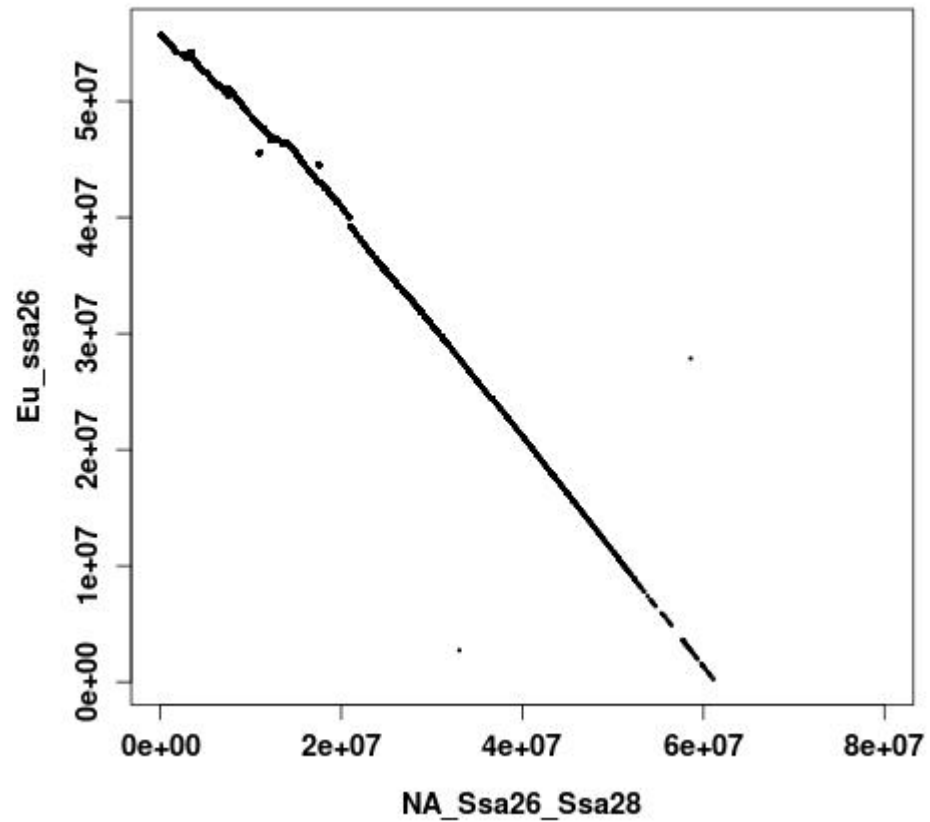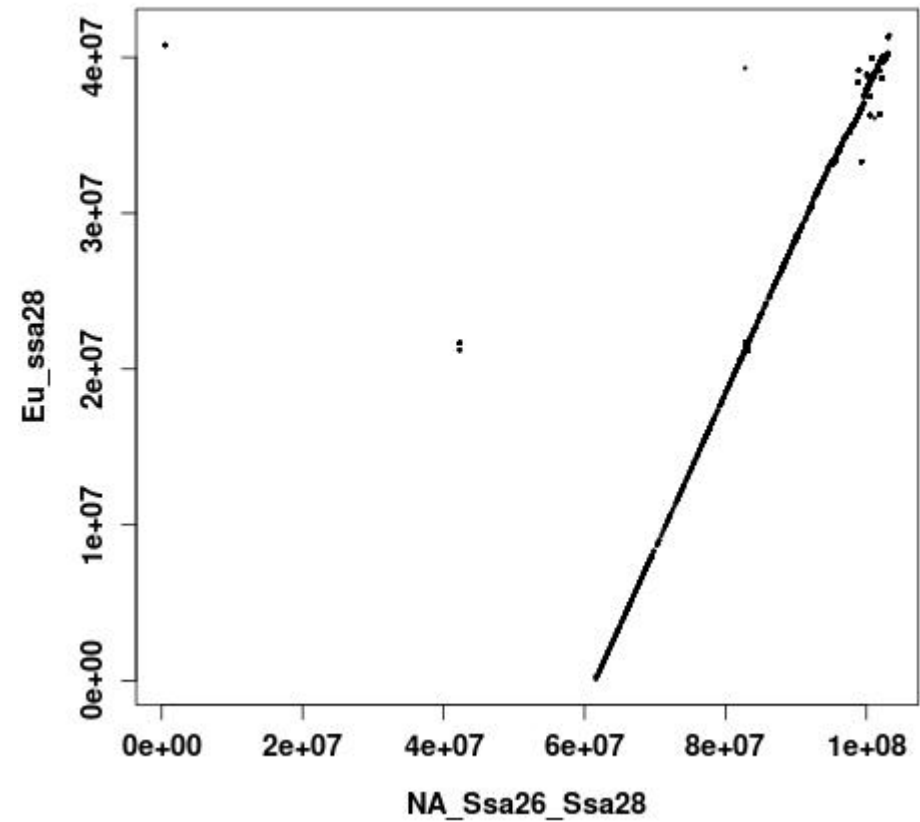

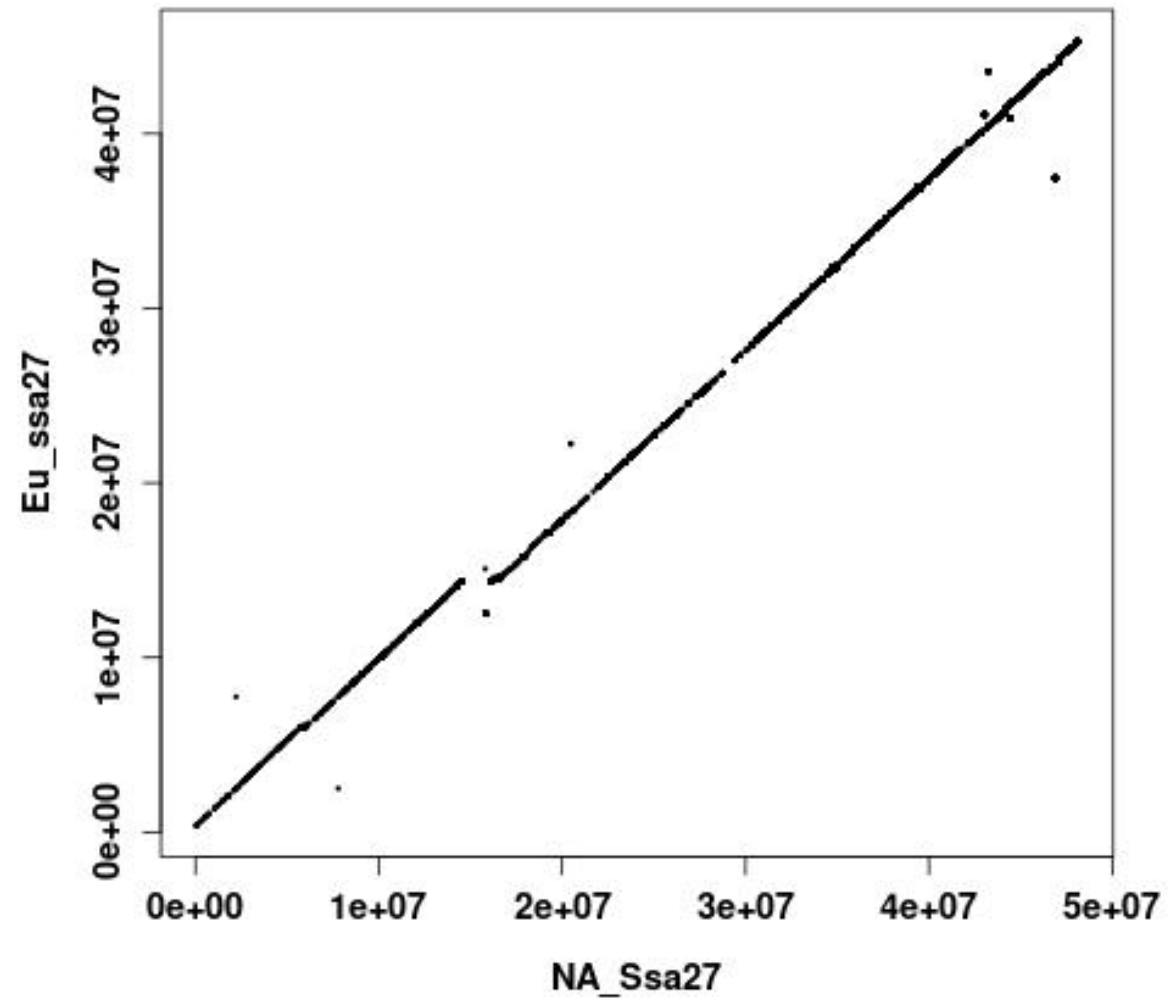

Supplement: Supplementary file 1 [file 1]
