# Supplementary material
Source: publisher figshare collection journal article supplement (https://gsajournals.figshare.com/articles/dataset/_/22540894)
Supplement: Supplementary file 1 [file 1]

## Sheet: HD_SNP_Array_Genome_Positions_N
SNP Marker ID	CHROM	Chr .	Position	AlleleA/AlleleB	Ref/Alt	Direction	Flank
Affx-1205092656	CM037938.1	1	154030	T/G	T/G	F	GTTTACGACATTCGAATGAAAGTAACATTGCGCAA[G/T]AATAATTTATGAATAGTTTAAAAATGTAATCAGTT
Affx-1205092661	CM037938.1	1	274560	T/C	T/C	F	TGCAACACCCTCCCCCTGTTTAACTCTTCCTTTTT[C/T]TCGTCTCCATCCTGCAACAGGCACTCCGCTCCTCC
Affx-1205092665	CM037938.1	1	338677	A/T	A/T	F	TTGTTCCCTAATCAAACTGAATCTTTTAAAACTAA[A/T]GCGTATTTTTCCTCTATCGGAGCCCTTGTATCTGG
Affx-1205092666	CM037938.1	1	394046	A/T	A/T	F	ATGGACTGAGATGGCAGGAGAAAGTAGATATCCAA[A/T]AGCTGGTTCATTTAACAAGACTAGGTTGGATTTAG
Affx-1205092667	CM037938.1	1	590899	A/T	T/A	F	TTTAAATTCCCATGTACCCGATAAAAAAAAAAAAT[A/T]GTTCAGAGTTTCCATCACGTTTTCAACTCTACTGA
Affx-1205092668	CM037938.1	1	598592	T/G	T/G	F	GACAGTGGGGGTACTCATGTTGCCTTGCTCATCTC[G/T]GATAGTATTATTTGACTAGGCCTTGGGTTCTCTCC
Affx-1205092669	CM037938.1	1	603503	A/T	A/T	F	CATGACCCAAGTGGTAAATATATATGCACATAGAT[A/T]AAAAAAAAAAAATTGTTTGAAATTATTAATCCTAA
Affx-1205092672	CM037938.1	1	619477	A/T	T/A	F	TTCGGGAAACATTAAAGGAGCAGTATGTCCAGATT[A/T]TATTAAAGGAACAGTTAACCCAGATTGTTAAAATA
Affx-1205092673	CM037938.1	1	660118	A/T	T/A	F	TGCCATCTTTTGAGTTCAATATTACTACATTTCAA[A/T]TTTTTTATGTCTACATTTTTCAGACAGTCATGTAC
Affx-1205092674	CM037938.1	1	954948	A/T	A/T	F	AAAGTCAGTTGCTTAGTAACATCATTAAACAAGAG[A/T]AACCTTTTCCTGCCCTCCTCTGTAGAGGGAGGGTG
Affx-1205092677	CM037938.1	1	1081358	T/C	C/T	F	GACAGTTGAAGCACCGTTGGCTGTGTTTACAACCT[C/T]GAGTCTTCTTGGGTATGACGCTACAAGCTTCGCAC
Affx-1205092679	CM037938.1	1	1216217	T/G	G/T	F	GACTAAAATGTAAAATGTAAAAGAAATTGTAATTT[G/T]GAAAATATTTAGAAAATTCAAAAAGCAAATCTTTC
Affx-1205092681	CM037938.1	1	1226592	A/C	A/C	F	ACAGCCATAGAAGCAGAGGGACATATGCCTCAATG[A/C]GGCCATATTTGTGGCTTATTGGCGTTGTGGCTTTT
Affx-1205092682	CM037938.1	1	1235369	A/T	A/T	F	CCTGCCTCCCCAAAAATGTTGGATGGAAACTTGAT[A/T]TTAGCTGTGATTTGCAATGTGTCATTATAAACATA
Affx-1205092684	CM037938.1	1	1241738	A/G	G/A	F	TCAGATAAGTCCACATCCCCAGCATCCTGTTTTGT[A/G]GAAGGAGCTACAATCCAATGCCACAATCCAAAATG
Affx-1205092687	CM037938.1	1	1315847	A/T	T/A	F	ACCGTATTATTCAGAGCCCAATGAAATGACACCAC[A/T]TATACATATCTAGTCTGCATAACGCATTATAGACT
Affx-1205092691	CM037938.1	1	1357880	A/G	A/G	F	ATGTTAAAAATATATTGAATATATTGCAAATGGAC[A/G]AGGCTGTTTCTCAGCCTAAGAACGTTGAGAAATGA
Affx-1205092692	CM037938.1	1	1378187	A/C	C/A	F	TTTGCTCTGATTGGAGGATGCAATGGGAGCGTGCT[A/C]AGAGTGAAGAAGATCTGCACTGGAGGCGTGGCCCA
Affx-1205092693	CM037938.1	1	1383478	A/T	T/A	F	GATGTGTAGTGTCAGCTTTTGTTGCTGGCATTTCA[A/T]GCCTAAGTTTGAAAAACTTGCCAATGAAATATAAT
Affx-1205092695	CM037938.1	1	1402375	T/C	C/T	F	TTTACTTCATGTAAAATTACCATCTAGTTTGATAT[C/T]AGATATAATAGCAGCTTTTCTAGACCATATTTGGT
Affx-1205092701	CM037938.1	1	1542648	A/G	G/A	F	AAAATGGACGTTCTAAAGAAGTGTTCTAATCAAGC[A/G]TTCAGATCACACCGGTTTGATCGTACGCAACAGGG
Affx-1205092702	CM037938.1	1	1587546	A/C	C/A	F	TCAGGCTGGTTCCATCAGGATACATCACCCAGGCT[A/C]TAAAAATACATGGTGGAGCTATTACTATATTGACG
Affx-1205092705	CM037938.1	1	1629279	A/G	G/A	F	CAGAAGCAGAAGAAGTAGCGCTGGTTAAAATGGCC[A/G]ACACAGTTATTCAGCCACGCTGGAGGAAACGGGAG
Affx-1205092715	CM037938.1	1	1975227	A/G	G/A	F	TGACTAATGGGGCAATTGAAATCGGCGAGGGGGAA[A/G]CATTTTGGGGGTTCTTGCATTGGAATTATATTGAA
Affx-1205092717	CM037938.1	1	2001463	C/G	G/C	F	CAACACAGAGGTTTATGGGTCAGGGTCCGATAACT[C/G]TATCACTATGGGCTGACAAAGGGCTTTCGATTCTT
Affx-1205092718	CM037938.1	1	2294436	A/G	G/A	F	TCAAGAGGGGAGAAGTCCTCAACTTCAAACTTTGT[A/G]CTCTTCATAGCAAAGATAGCTTAGCTTACCTTGCT
Affx-1205095056	CM037938.1	1	2557552	T/G	C/A	R	ATACATTGGAACATGCATTTCTATTTCTCTCCCTT[G/T]AAATTTTGTTTGGGGGAATTATTTTGTTGTACTAT
Affx-1205095055	CM037938.1	1	2562550	A/C	G/T	R	TTGGTCACGCTCATCTGTTTTGCCCTATCTGTGAT[A/C]GATTAATCGTCCTGGTGAAACGTCAATCATAGAAA
Affx-1205095051	CM037938.1	1	2610205	A/T	A/T	R	AAAGGACCCCTACAGGCACAATTACAAGGGAGGCT[A/T]ACAGTCCTGAGTGGTTATGAATGATATCCTTCTAT
Affx-1205179180	CM037938.1	1	2730154	A/G	C/T	R	GCAATTACACATAGAACAAAAATGGGTGAGTAAGT[A/G]GATTTCCCAATAGATTTTCCCACTAGGTCAGGGCT
Affx-1205095029	CM037938.1	1	2788564	T/C	G/A	R	GCCGCTACATCTCGCGTGCCCAGAACCGGAAAAAT[C/T]GGTAGGGTCTGGGGTTCATTTGACAGTTCGGTCCT
Affx-1205095027	CM037938.1	1	2818860	A/C	G/T	R	AGATCAAGTTGAGTTGACAAAATGAGAAAAAAAAA[A/C]CGAACAACTTTTCTGTATTGGCAACTCTCTTCCAG
Affx-1205095025	CM037938.1	1	2865540	A/G	T/C	R	ATTAGAAATAATAATACCAGTAATATGAATTGAAT[A/G]CATTTGAAAAAACCTTACTGTGTATCCCTCAAGTG
Affx-1205095021	CM037938.1	1	2902066	A/G	C/T	R	TCTGTGGGGTGATTCTCTCTGTGGGACATGAAGGT[A/G]GTGGTGGACCTGGGGAAGGAAGAAGGAATTATTTG
Affx-1205095020	CM037938.1	1	2909587	T/G	A/C	R	AATCTGGCCTAAGTATGCTTGTCTCCCAAGAAGCA[G/T]AACATGTCACCCAAGGTAGTGTGTTGTAGCAGAGA
Affx-1205095018	CM037938.1	1	2917583	C/G	G/C	R	CATGGTAGGTAACTAGCTTGTTAATTGTTTACAAA[C/G]AAATTAGTGAACGCGCTAGAAAGCTAAACAGCAAC
Affx-93359017	CM037938.1	1	2922766	A/C	G/T	R	TATATTGTATTTTCAGCTGTTTGAAGCTGGTGTAC[A/C]TAACCAAAAGTAAGACGTAAAAACGAAACTTAAGA
Affx-1205095016	CM037938.1	1	2951704	T/C	G/A	R	CTTTCTGAATGCACTGTATTACTCCATATCTGTAG[C/T]GTATAGTGAGTACCCCCACTAGGGATGGGCACGGT
Affx-1205095013	CM037938.1	1	2961534	A/C	T/G	R	ATACCATGGTATTTTCCTGCCATGGTAGTGACCCC[A/C]AAAAAATAGTCTTTGTACTACCATGGTACATTTTT
Affx-1205095011	CM037938.1	1	2968867	A/C	G/T	R	GATGTGTTCTAATGAAAATGTATGCTTATGCATAA[A/C]ATTACAGAAAGGCTGTAGATGAACATTAGGTCATG
Affx-1205095010	CM037938.1	1	2982063	T/C	A/G	R	AAATCAGATGTGCTCGTGCTGCCACATACACCGAG[C/T]GTACAAAACATTAGGAACACCTCTTTCTATGACAG
Affx-1205095009	CM037938.1	1	2991100	A/C	G/T	R	ATGTCTTTCAAGTGCCTGTGCCGCTTCTACGATAG[A/C]CTCTAATTAGTAGTATGCGACTGTGAAGATCTTGT
Affx-1205095008	CM037938.1	1	2996433	T/C	G/A	R	CTTAGCTAATACGACGTTTGCCAAATTCCTGAAAC[C/T]TTCCCCAAATTCCCAGAAACTTTATGTTTTTTTAA
Affx-1205095007	CM037938.1	1	3014160	A/C	G/T	R	GGGCATTTGAAAAGAAGAGTGTGTAATTGTTCATT[A/C]AAATTTTTGTGAGTTTGATATTCATATTGTTTCTA
Affx-1205095107	CM037938.1	1	3104815	T/C	T/C	F	ACAAATGATTATGGTGATGATACACTCACTAAGAA[C/T]GAGTAATTCTAGTTGTTGCCACCATGTTTTTTGTA
Affx-1205095112	CM037938.1	1	3234335	T/G	T/G	F	TACATAGATGCTAATAACCCCATGGAGAAATAAAA[G/T]AATGATTCTCCCACAATCTGTGAACTTTGTCATCA
Affx-1205091520	CM037938.1	1	3462619	A/T	A/T	F	AGGGCAAAAAAACATCATGCCTGTCCACTTTTCCA[A/T]TGACAGAAGTAGCCTATAGCTTGAACAGACAGAGA
Affx-1205091522	CM037938.1	1	3469754	T/C	T/C	F	CAGGAGGGCAGCTGTTTTCGGAGATATACTGGATC[C/T]GACGAGCCTGGCACCAACGATCATACTACGCTCAC
Affx-1205091523	CM037938.1	1	3475671	A/G	A/G	F	AGTCTATCCATGTCATACACTATTAAAGGCCTTGG[A/G]AAACGATCAGGCATGGTATAACCCCACTAGTGCAC
Affx-1205091525	CM037938.1	1	3697748	T/G	T/G	F	TTGATACAGTTTATAGTCTTCAAATGGCAACGATA[G/T]GATTCTGCAGTAGCTATTTAAGCGGCGATTCTATC
Affx-1205091526	CM037938.1	1	3717820	T/G	T/G	F	TACTACACAAGACAAACATGCAACCACATTTAAAT[G/T]ATCCATATTTGGGACAGATTAAATGTGAAACATCC
Affx-1205091528	CM037938.1	1	3730849	A/C	A/C	F	ACGAGTGTTTTAGCGATGCATCTTTCCTACAACAG[A/C]CGAATTTGCAACGAAAGAACATTGCTAAGAGCATC
Affx-1205091531	CM037938.1	1	3741648	A/G	G/A	F	CTAACCAGGAAACATGTCAGCGAACATTAACAAAG[A/G]TATATTAAAAGAGCCTGCTGATGCCTTTTTATTTT
Affx-1205091535	CM037938.1	1	3767715	A/T	A/T	F	ATTGAATGCTGAACACCATCGGTTTTCTCTTGCAT[A/T]GTAAAAGTGTTCTAGCCTGTTTAGACAATGTTTTG
Affx-1205091536	CM037938.1	1	3775547	T/G	G/T	F	GCACAGTGGTGAGACACATGGCTATTTTTATTTTA[G/T]CTTTATTTAACCAGGTAGGCAAGTTGAGAACAAGT
Affx-1205091537	CM037938.1	1	3866060	A/G	A/G	F	AAGCCAAGGTGTCATCCCACCTTCCAGGTGGTGGG[A/G]AGAGATGGTGCACTCTGTTGCCATGACAGTGGAAG
Affx-1205091539	CM037938.1	1	3963759	A/G	G/A	F	TTAATTCAGTGCACTAAACAAAAATGCAATTATAT[A/G]GTAGTGACATGAGTAAAAAGGTGGGGGGATTGGCG
Affx-1205091540	CM037938.1	1	3969887	A/G	G/A	F	ATGACGTGTCTGAGGAGAACGACGAGGCCATGCCC[A/G]TCCCAGAGGACTTGTCTGCTAGCTCCAATCTGCAA
Affx-517055909	CM037938.1	1	3981064	A/C	A/C	F	AAACAAATATATATTATTCATCTGTTATGTTTGAT[A/C]TGGAACACTGATCACAAGAACCTACTGCATGACTT
Affx-99008223	CM037938.1	1	3984133	T/C	T/C	F	TCAGGAGAGCGTCCATTCCAGTGCACCCAGTGTGG[C/T]GCTTCTTTCACGCAGAAAGGCAACCTGCTACGTCA
Affx-1205091544	CM037938.1	1	3996858	T/G	G/T	F	TTTGCAGCGCATACATCAATTCAGATTTTCGAAAT[G/T]GACAAAATCTCAAATCTAATGCAAAGGCATTTTAG
Affx-1205091546	CM037938.1	1	4055293	A/G	A/G	F	GTTTTGTCCACTAGAGAGCGTCAATATATCACATA[A/G]AACAGTATACGTTCCAGATAAATAGGCCTAATTGC
Affx-1205091549	CM037938.1	1	4126750	T/G	T/G	F	AGTGTGAACACAGATTACGCCTCTTTAAATACTTG[G/T]GGTTTTGTCTTTAAATCTGGGTGCAGAAGCGACCG
Affx-1205091552	CM037938.1	1	4144395	T/G	T/G	F	CCTTACAACCGGTCAAACTAATTTAATTTGGAAAT[G/T]ATGTACAGAAAATATTTCAACTTATTTTTGTTGGT
Affx-1205091557	CM037938.1	1	4160304	T/C	C/T	F	AAATGTGGGTGTGTGCATAGTGCACACTACACAGC[C/T]AATGAGGTCATAGATGGTTGTTGGAGGAAGTGAGT
Affx-1205091560	CM037938.1	1	4261012	A/C	C/A	F	GATGGGACTGATAAACTGGAGATCCTGGAGATGGA[A/C]ACCATGTTGTGTTCCATTGAGGTCTTAAGCAGCAA
Affx-1205091564	CM037938.1	1	4480400	A/C	A/C	F	TTCAATGCAACAACCTGTTTGCATAATGTGCTATA[A/C]ATTTTTTGGGTAATCTGCTGCTGCGCATGTAATGT
Affx-1205091565	CM037938.1	1	4528853	A/T	T/A	F	TTATGACTGATGGTTTGTGAGTGGGGGCTTACGTT[A/T]TCACAAGACTTAGAATGAAAACCTACAAGCAACGC
Affx-1205091566	CM037938.1	1	4552200	A/G	G/A	F	TAAAGTTTTTCTTGAAATAAATGCTACATTTGAGT[A/G]TTTCCCAGAGGCTTTGGAAAAAGTACCTGCTGTGT
Affx-1205178636	CM037938.1	1	4559991	T/G	G/T	F	ATGTGAACCCCTCTTCCTGACCATGACGGTGAGAA[G/T]GGCGAGACTATAGTGTTGACTGTGAGTGTTTGAAG
Affx-1205091567	CM037938.1	1	4601571	A/G	G/A	F	TAGGTGACTGTGGGCAGCTGGGGCTTGAGCAGGTC[A/G]TGCTCCACGATGTCCAGCATGCTTTTCAGCTGACA
Affx-1205091568	CM037938.1	1	4607624	A/G	A/G	F	TGACACCAAAATCAGATCTTACCGGCCTCCTGCTC[A/G]CGCGATGAGCTCTTGGCATCACGGCTGGCCAGGAT
Affx-1205091570	CM037938.1	1	4636238	C/G	G/C	F	CATATTAGCAACCCAAGCTACTTGTTGCATATTTA[C/G]AGATCCTTTAGAAAGGGGGGATATTTTCATGTCAC
Affx-1205091571	CM037938.1	1	4643951	T/G	G/T	F	CACATGTATAATCCTGTAATATTACTCTGGCCCAT[G/T]ATGGCAAAAAATATATACTAATGTGGCCCTCCACA
Affx-1205091572	CM037938.1	1	4656139	T/C	T/C	F	AAAATATTTGTTCAGTTTGGTGCCTAATGAACAAC[C/T]CTGTCTAAAAAGCTTTGGCAGAAATAGGACATACC
Affx-1205091573	CM037938.1	1	4747966	A/C	C/A	F	TATGGTAGGTCCTATGTGATATTTTTCCATAACCT[A/C]CTGGTCATAATGTTGTTGCTCTATGTCTGATTGTT
Affx-1205091579	CM037938.1	1	4797160	T/G	G/T	F	TGTTCTTAACTGACTTGCCTAGTTAAATAAAAAAT[G/T]CATCTCTCTCTAAGTACTGAATGATAGATCTCCTT
Affx-1205091581	CM037938.1	1	4814898	A/T	A/T	F	CAAGATGCCTAGAAGCCTAAGAAATGAGAAAAAAA[A/T]TATACAATCTTTCTCCAATGGAAAATATACAGAAT
Affx-1205091583	CM037938.1	1	4832309	T/C	T/C	F	GGGCTGTTGGATAGCTTGATGAACCCTGTCTCTGC[C/T]GTCTTCCGGATCTTCTGCTCTGCTATTTTTCTCTT
Affx-1205091584	CM037938.1	1	4847761	A/G	G/A	F	AACTGTAAAAACCCCATGCATAATAGTATTCCCAC[A/G]CATAATAGAGAAATACTGTATATGTGATAGTATAC
Affx-1205091585	CM037938.1	1	5123590	T/G	G/T	F	CTTTGTATATATAGTGTAAGTCACATTTATTAATA[G/T]TATTCATTATGATCTAAAAGGCTACATTTATCCTA
Affx-1205091587	CM037938.1	1	5140059	A/G	G/A	F	TTACATAGAGTTGTAGGTTCTGCGTCAGTCACATT[A/G]CATACTGTGTGACAAGTAGCCCATGTCTTGTTATA
Affx-1205091588	CM037938.1	1	5145773	C/G	G/C	F	ATAACCACAGAAATATAATTACTAGACCTGACATT[C/G]TAATTACATAGATTATGATGTGAAATATGAAAATT
Affx-1205091589	CM037938.1	1	5154266	A/C	C/A	F	AGTCGGCACAACTTAATAAAAGTATGAGGGGTAGC[A/C]CAACAAGCCATATCACAAATGCCTTTAAACAGTGC
Affx-1205091594	CM037938.1	1	5254416	A/C	A/C	F	CGCCTGCGTACTCGGGGACACACCCGTCATCAATA[A/C]CGTTAGAGGACTCAGGACAGTTACCTTGAGCCGTC
Affx-1205091595	CM037938.1	1	5269471	C/G	G/C	F	CTTAACCTATATTGCTACTCCTTGTCCAGCTGTTG[C/G]AAAAAACACTAAGGCTATATGGATCAGCCAATCCA
Affx-1205091597	CM037938.1	1	5283121	T/C	T/C	F	TGGTGAAGCAAGCTGCAGGGTGCCTGACTGCCTGC[C/T]CTGAACAAATAGTTTGTAGTGTTGCCAGTCCCAGT
Affx-1205091598	CM037938.1	1	5288721	A/G	A/G	F	TGACCTTGATCCCGTGTGTGTGTGTGTCTGCATAT[A/G]TGCAGCACAGCCCATTCACTGTTCAGCATTACATA
Affx-1205091985	CM037938.1	1	5588911	A/G	G/A	F	ATGAAAAAGGTCAAAGTTAACCGTGGAGCGTCGGC[A/G]AAGAGAGTGAACACGGAAATGCGCTTGCTTGAAAA
Affx-1205091986	CM037938.1	1	5599098	T/C	C/T	F	TGATTATTAATCAAACAGCAGGCAAACAAAACAAT[C/T]ACATTTAGAGGGATTCTCTGAGACGGAGACAATGA
Affx-1205091988	CM037938.1	1	5611340	T/C	C/T	F	GTTGTAGCTACAGGTTCACCTGCCACATCTAAAAG[C/T]CTATTATTTTGGTCTGCTGCTACAGTGGTTCCTCA
Affx-87970973	CM037938.1	1	5621656	T/C	T/C	F	AAATGGTCAACTGTGTGGGAAGCTCCTAACATCAT[C/T]ATACAACGTGGCACACCATGTAATCCCGCTACTCT
Affx-1205091996	CM037938.1	1	5631492	T/G	G/T	F	CTAACCACCGATTAAGTAACACTATGGATTAAACG[G/T]TCAAATCCTGTTATTATTTTGCTGTGACAATATAG
Affx-1205092001	CM037938.1	1	5645102	T/G	G/T	F	CCCCTAAATATAGGTACACTCAGGCGTTTGTGCAT[G/T]TTCAATGCCTGCAGTACTTCACATATGGTCATCGA
Affx-1205092006	CM037938.1	1	5775910	A/C	C/A	F	GTATATTTTCATCCTAGCCTGTAAACTAATCCTGC[A/C]TGGCAGATCTTAATGTGCCTTTAGCTTCTACCAAG
Affx-1205092008	CM037938.1	1	5782339	A/C	A/C	F	CCTGTATCCAAAGATATTTTCCCTACAGGTAAAGC[A/C]TCGTTTTTTCTTTTTCTTATGTGCTGACTAAAGTC
Affx-1205092011	CM037938.1	1	5796950	A/T	A/T	F	CAGAGTTATGGGGAGGGCAAGTCATCATCAATATC[A/T]TCCGAGGTTGTCCTTTACAGGCCACCATACACAAG
Affx-1205092012	CM037938.1	1	5803294	A/C	C/A	F	GTCCTTCAGCAAGGCACGTAATCCTAATTGCTGCT[A/C]TAAGTCGCTCTGGATAAGAGCGTCTGCTAAATGAC
Affx-1205092013	CM037938.1	1	5813746	A/T	A/T	F	TTGGAAATAACACCATTCTCCCTGCACTGTAATTT[A/T]CAAATTGATAAGGGCTAGGTAAATGTATTAAGCCG
Affx-517055944	CM037938.1	1	5823906	T/C	C/T	F	GTTTCTCTCTGTTGCTGCTCCCCGTCATATCAGCT[C/T]CCCCATGAAAAAAACAATGCGAGATCTCACTATGA
Affx-1205092016	CM037938.1	1	5842510	A/G	A/G	F	AATACAAATAAAAATAAATATTAGGCGAAAGTGGC[A/G]GGTAGCAGGATCACTAATATTAAACGGTATGGTAG
Affx-1205092018	CM037938.1	1	5854165	C/G	C/G	F	ACCTTTAGGGAATACGGTGCCATTTAGGATGCATC[C/G]TGTGTGTCAGAGATTTGTTGTCTGCCATCTACTAT
Affx-1205092020	CM037938.1	1	5942862	C/G	C/G	F	GCTTTACAATAATGTTGAAATAATGGAGTATTTTT[C/G]TGGGTTAGTGGGTTAAAATCTTCATAGAAGTCACA
Affx-1205092022	CM037938.1	1	5947780	A/G	A/G	F	TGCTTTTGTTTGGGCGGTGTCAGCCATGTAATTGC[A/G]TTAGAGCTGTCCAATCGGTAAGCGGCTGTTCTTGT
Affx-1205092024	CM037938.1	1	5956040	T/C	C/T	F	GAACCAAAAAGGGTTTGGTTTTACTACAAGGACAG[C/T]GGAACAACACTTTGTTCTTGGTAGACCTTTTTTTC
Affx-1205092027	CM037938.1	1	6016668	T/G	T/G	F	AGAGTTTTGGCAACAAGGCTGTGACATGGAAAATA[G/T]TTGTCCTTCCTTTCTCTGGGGGAAAAGGGTACGTC
Affx-1205092029	CM037938.1	1	6023311	T/C	T/C	F	TTCGGTCCCTCAGGCAGGCTACTGTGGTGGTACTG[C/T]ACCTGGCTTAACTACCTAGACCAGAGATTCACCAG
Affx-517055950	CM037938.1	1	6033073	A/C	A/C	F	CCAGATATGCTATGAGGGGGGGAACTGCTCCAATG[A/C]AAATCGCAGGATTTCAAAGCATAAATTCTAACAGC
Affx-1205092033	CM037938.1	1	6045425	A/G	A/G	F	AGAATTAGGGTTGTGTTCATTAGGACACACGCAAC[A/G]GAAAACTAAAATGATTTTATTATTGGACCAGGTCC
Affx-1205092035	CM037938.1	1	6271001	C/G	C/G	F	AAGATCTTTGAGAATTAACAATCACCTAAATAAAA[C/G]CTAGACAGTGAAGGAGAATCAACATTTTTTAAAAC
Affx-88038891	CM037938.1	1	6278834	A/C	G/T	R	GAAACAATTGAGCAAATGCATCCCTTGACATTCCA[A/C]ATTTCTAAAAGGGGTAATTTACACTACATACATTT
Affx-1205092040	CM037938.1	1	6283790	T/C	C/T	F	TGCTGCAAAAAAAAAAAGCTTTTAAATTAATTCAA[C/T]CTGTGTGCTAGTGTACCAAAGTATAGATTAGGTGT
Affx-1205092041	CM037938.1	1	6301054	A/C	C/A	F	TATTTGGAGAAACCCATGGGCCAGTGTTGGTACTG[A/C]TGACAGCATCACGAGGCGGAAAATGCAAATAGTTA
Affx-517055954	CM037938.1	1	6330703	T/G	T/G	F	AGGCCTACAGTAAAAGCACCAGAAGTCGGCTAAAT[G/T]ATTAATGGTGTGATGCCCATCACCTTACATAGGCC
Affx-1205092043	CM037938.1	1	6359297	T/G	T/G	F	AGAACCCCAAATACAATTCCATGTACAGATAAATA[G/T]TTAATCAGTTAGAATAAACAACTCCCTTGTAAGAT
Affx-1205092044	CM037938.1	1	6366199	A/C	C/A	F	AGATTTTGGCAATTAAGCCCTTTAGCTACTTACCC[A/C]GAGTCGGATGAACTCATGGTTACCATTTGTATGTC
Affx-1205092046	CM037938.1	1	6438166	A/G	A/G	F	GCCATCTCCTGCTCTACAATGTGGTTTCACGCTGT[A/G]GGTTTGTGAAAGGAAAATACTATTCTTTTTTTGCA
Affx-1205097133	CM037938.1	1	6641269	T/C	A/G	R	CTGCGGTATTTGGTACGCCGATTTTGGAACCATAC[C/T]TGTCAAATACAGTAAGAAATAAGTCTTAAGTAGGT
Affx-1205097131	CM037938.1	1	6664457	A/G	T/C	R	ACACACACATGGTCACTAACACATCGAAAAAAGTC[A/G]TCACACACACACACACACACACTCATGCTTACGCA
Affx-1205097129	CM037938.1	1	6711825	T/C	A/G	R	TAGTTGACATATGTTAAGTGGTGGCTCATCTGTTA[C/T]AATTATTATAACCTCTATCCCCCCAGGCTGATCAA
Affx-1205097128	CM037938.1	1	6724421	T/C	G/A	R	AAATAGCAGTCCTAGCTGTTAAAAGCTAACCGCGT[C/T]GCGAAATCCACGCCTAAATACCAAGTTTGGTATTC
Affx-1205097120	CM037938.1	1	7263330	A/G	T/C	R	AGAAAATCGAGTTAAGTTTTTGAAAATAAGTTCCC[A/G]AAATTTTTTTTTCCTATGCATGCGAAATTTTTCAT
Affx-1205097115	CM037938.1	1	7280234	T/C	A/G	R	ACACATACACTTGATTAAACATCTTGCTGTATGAA[C/T]ACTGTATTTGGTAAAAATGACGGTGTATTTGACAG
Affx-1205097114	CM037938.1	1	7304722	A/T	T/A	R	CCCATTGGTCTGTTGATAGGCTAACACGGTATTCA[A/T]CTTGTTATCCATCTCAAGCGTTGGGTCATCCACTG
Affx-1205097113	CM037938.1	1	7388680	A/C	G/T	R	TTCCTGGGAGTCTTTTACTGAGAGCAGAGATAATT[A/C]AATGTCGGTGTGAATGTTGACAAGAGAAAGTGATA
Affx-1205097112	CM037938.1	1	7530614	A/G	T/C	R	ACACCAAACATACAAAATATGTGTTTTACAGCTAT[A/G]AGGAAGGTGAAATCTTATAGTTAGTCGTTTTATAT
Affx-1205095142	CM037938.1	1	7600047	T/C	C/T	F	CCATTAATTATCACAGCAATATTCGGTTAGAATGT[C/T]TGTGGGACGGCATATACAATGTCAACCACAACTCA
Affx-1205095144	CM037938.1	1	7610114	A/T	A/T	F	TTGTAAAACAGCTCACAGCAGAGATTTCTGGGAAT[A/T]GGATACCACAAATACTTGACATTCATTAATGTGGT
Affx-1205095146	CM037938.1	1	7623279	A/T	T/A	F	GGGAATTAAAGGGCGATTCTTGGATGACAGTGTAA[A/T]ATCTGAAAAGGTACTCTCCCTAAACGAATGAATAC
Affx-1205095148	CM037938.1	1	7742442	A/G	A/G	F	AGAGGAAAAGTACATTCTTAACCTAATGGAGCCAT[A/G]CCTTATTTATTAAACCCAGATCCAAAATAACCTGT
Affx-1205093714	CM037938.1	1	7863476	A/C	T/G	R	CCGTTCAGAATCCCTTTGCAAAAAATATATAAATA[A/C]ATTTGCACAGATTAATATTTCTCGGAAACACTTCA
Affx-1205093713	CM037938.1	1	7869959	T/C	G/A	R	AGGCCTTTTAATTACGTTATATTAACAGCTCGTCT[C/T]TAAGCAGCTTGTCCATAACATCACCAAAATAAATG
Affx-1205093712	CM037938.1	1	8011239	C/G	C/G	R	TATTCTCTCAATGTCCAAATTATCCTAAAGAATCT[C/G]AAATAGTTGTGAAGCTCAACGAAGTTACTTAGTTG
Affx-1205093711	CM037938.1	1	8019765	A/G	T/C	R	AGACGGACCAGGGCCTAAGGTGAACGACCCTGCAC[A/G]TTCACTTGTTACAGTAGAGTAGTGGTTCTCGAAAG
Affx-1205093709	CM037938.1	1	8044554	T/C	A/G	R	ACGTCATAGGATACTCAGGTCAGTCTCCTTCCACT[C/T]GCCAAACTATTAATGTGAGTATTGTCTACCTGCCG
Affx-1205093707	CM037938.1	1	8051300	T/C	A/G	R	TCCTAAAAAAACATTGCAGTTTTACCCAATAAGGC[C/T]TATGTGCACATTTTGCACGCTCCTTTGTCCATAGA
Affx-1205093705	CM037938.1	1	8210659	A/C	T/G	R	TAACTCCTATTATAGGTAACGTTCACTCCCTAAGA[A/C]TTACAAACTCACAGGCTTTTGCTAATATGTTCAGT
Affx-1205093703	CM037938.1	1	8294730	A/T	A/T	R	AATATAGTTGACTACCCCTGGTCTAGGCATTGGGC[A/T]GTTCTACCTGTGGACATTACACAGTCAATTGTCAC
Affx-1205093702	CM037938.1	1	8300026	A/C	T/G	R	CCGCAGGACAACAACCAAACGAAATGCAACAATTC[A/C]GTTTTCTGTCAATGACGTATGCTTTCAATGGGATT
Affx-1205093701	CM037938.1	1	8309994	A/C	G/T	R	ATCTGGACAGAAATAACATTTCAGGGCAGAAATCA[A/C]ACGTTGTGAGCAGTATGAGACCTCAGCTTAACAAA
Affx-1205093700	CM037938.1	1	8316232	T/G	A/C	R	GATGTGTTGTGGTGTTAGGGGTGTTGTCGAGAAAT[G/T]TGTTAAAGAGGGAAAGGAAACCAACTTTAGAGCAT
Affx-1205093699	CM037938.1	1	8426427	A/T	A/T	R	ATTTGAATCAAACATGTTTTAGGAACACTTGTTTT[A/T]ATGGAATGTGGTAAAGGGTTCTGAAATGAATGTCA
Affx-1205093696	CM037938.1	1	8460320	A/C	G/T	R	TCTCTGTAGTGCAAGCAGCCAGGGGGTTGTCATGG[A/C]GACACACCTGAATAAATCAAATTAAAAATGGTAAT
Affx-93323074	CM037938.1	1	8466770	A/C	A/C	F	GTCATCAGCACCACAGAGTGTGTGGAAGAACATTT[A/C]CAAAGACAGTGAGAAGAAATCTGATGTAGTTTCAT
Affx-87937396	CM037938.1	1	8486363	T/G	A/C	R	TCCGACACCATGAGCCTGACTCCCGCCGACGTGGT[G/T]CCCACCTCAGTCATTGCCCGCATCCTGGAGAAGCC
Affx-88006111	CM037938.1	1	8507728	T/C	C/T	F	CAGAACGGTGTGGTTGATCTGCTCAATGTCTTAAT[C/T]TTACCACACACTGTGGTCCTACACTATACACAACT
Affx-1205093693	CM037938.1	1	8513382	A/C	G/T	R	GTAATGTGGAAAAAGTCAAGGGGTCTGAATACTTT[A/C]CAACTACACTAGACACTGAAGTAGCTTACACTGAA
Affx-1205093688	CM037938.1	1	8658848	A/G	C/T	R	TTGGAGTGAGAATACAGCGTCTGAGGGAGGAAAAG[A/G]CTTCTTGCGTAAACTGAATATTTGTCTTTATTGTT
Affx-1205093685	CM037938.1	1	8671590	A/G	C/T	R	GTACTGTCTGTACTTGGCTGTAGTAAATAATGGGG[A/G]CTTGCCAGGTAGGGTGTGTGGGGTGCGTGTGGTAG
Affx-1205093682	CM037938.1	1	8704310	T/C	G/A	R	GCCCACTGGAGCCACTTGTTTTTAGCTGATACGAG[C/T]GGAACCCGGTTAGGTCGTCAGCTGCAATAGCCCAT
Affx-1205093681	CM037938.1	1	8709389	A/T	T/A	R	AATTAAATGGTGAAACTTGCATCCTGCCAAATCAG[A/T]AAAGCAAGGCAAAGCAATTCAGGCATTCTTGAAAG
Affx-1205093678	CM037938.1	1	8759677	T/C	A/G	R	TCTTTGCATAGACCGCCGTAGAGGCTGTAACTTCT[C/T]CATCGTTTACGGCCCAATAAAGTGTCCTATCAAAG
Affx-1205093677	CM037938.1	1	8778937	A/G	T/C	R	TTTATAGCAGCAGTACCACAGCCAGTACCACATCC[A/G]CCACCAGCACTGTCATGTCCATTAAAGCAGTCATA
Affx-517056006	CM037938.1	1	8818987	A/C	A/C	F	GTTTAGATTGGACATGGCTGATCATGTCACAAACC[A/C]AAGGGGAAAATACTCTGCAATTTACAGAAACCCTT
Affx-1205093676	CM037938.1	1	8835315	A/C	T/G	R	AGCTAGCTAGTTGCACATATGCTTTTTCTGCCATG[A/C]CTCTTGCGTTCCTATAATAGAGCCTTCTTCCCACA
Affx-1205093675	CM037938.1	1	8841046	T/C	G/A	R	TATCAGGAACAGGCCACCTACCTTGCATTGCTCAG[C/T]GCGCAGTGCTGGGCACACTGCTCAGTTTGACTACG
Affx-1205093673	CM037938.1	1	8848344	A/C	T/G	R	ATATCATGGCCAAGCATTGTTTTACCAAAAAATAC[A/C]TTGCTTTTTCATTCTAAGCTAATTTACATGTGTGG
Affx-1205093671	CM037938.1	1	8883080	A/G	C/T	R	AAAACAGATGAGGACTTCTCCTTAGCCTGTGGGTC[A/G]CTCAGGTGGGTGTCTAGGTATAGGGTTGGGGACCG
Affx-1205093670	CM037938.1	1	8894024	A/T	T/A	R	TGACAGCTTTAAAAGCACTTTTATCCACCCTCTTT[A/T]TACTCGACAGGAGCTGCCAAATGTGACTGATAGTG
Affx-1205093669	CM037938.1	1	8981848	T/C	G/A	R	TAAAAACAATTAGTGAAAATGTACAAACCTTAGGC[C/T]TACATCTCATTTCATCTTTTTGAAAGGTGATGGTT
Affx-1205094454	CM037938.1	1	9037973	C/G	C/G	F	TTTGCAGATTGGGGCAGGGTTTTTTTTTTTCTCCT[C/G]TTATTGAGTAGATCCTTTTTGTCGGTTTGATGTCA
Affx-1205094455	CM037938.1	1	9065230	A/T	T/A	F	CTAAATACATTACTAGACTGACAATACATTGTCCC[A/T]ACAACCTTTTTTAGTACTCAAAAGGTTGACTGTAC
Affx-1205094456	CM037938.1	1	9076200	A/G	G/A	F	CTGTTCGGAGGTCAGGCGCTCAGTCAAAGCCTCAT[A/G]AGACGCCAGAGACACAGTGCTTTCCTCTAGCTGGG
Affx-87874162	CM037938.1	1	9084754	T/G	G/T	F	GATTAAAAAGGAATGGACGTACTGATAGAAGAAAC[G/T]GTGAAAATTCCCTTTAGCCCAAGTTTACACTAATC
Affx-1205094458	CM037938.1	1	9154458	A/G	A/G	F	ATGAGCCATCGATCTGTCTGCCAGAGCATAAAGTG[A/G]GATTTCTGGGCCATAAAACATTCTGATGCAATATA
Affx-1205094459	CM037938.1	1	9161915	A/G	G/A	F	AATGGATACCGGTCTGCAGTTTTTTACGCCGAAGG[A/G]GTCGAGTGTTGGTTTCTTGAGGAGGGGAACCACTT
Affx-1205094460	CM037938.1	1	9203441	A/G	G/A	F	GAGAAAGTCTGCATTTTAAGAAAATGGTGATATGT[A/G]GGCAAATGATTGACACTTCAAGGGGGGAGGGATCT
Affx-1205094462	CM037938.1	1	9208826	T/C	T/C	F	CATATCTGCTTCATCTCACGGTTGACAAATCCGAC[C/T]ATGTCTGTCTCAACATTGCTGTACAATCACTAAGT
Affx-1205094463	CM037938.1	1	9219901	T/G	T/G	F	GGTATTCACATAGAATGTTCTTAGTTGAATAATAT[G/T]GATTAGTGCTGGACTGGAACAAAAGCCTGCACACC
Affx-1205094465	CM037938.1	1	9232402	T/C	T/C	F	CAGCAGAGCTCCATGGTCCTCCACTGACCAGACTG[C/T]CCAGGCTCTCCCTCAGCAGCATCAGACACAGGTGT
Affx-1205094468	CM037938.1	1	9264171	T/C	C/T	F	GAGAAAATGGGGGATGGCAAGAGCAACACGGAGAA[C/T]GCCGAATTCTTGAGAAGACAAACCCTCTTACGTAG
Affx-1205094469	CM037938.1	1	9294918	C/G	C/G	F	CTCTATTCCAACCACCTCCAACCGTCCAGCCCACA[C/G]TTCCCCGTAGAGGAGAGGGGTTCGCCATCATCTTC
Affx-1205094470	CM037938.1	1	9330696	T/C	T/C	F	AGTTCTGCTTGTTGCTGCTATGGTCTCACATCTCA[C/T]TAAAACATGTCCTGAAGGAATCAGCTTTGATTCCC
Affx-1205094471	CM037938.1	1	9370922	C/G	C/G	F	GCTGTGCACAGGCATAAAAATGTGTCTAATTTATT[C/G]AAAAGTCTACTAAAGTGAGACTTTGTCCTTGTGTT
Affx-1205094472	CM037938.1	1	9380092	A/T	A/T	F	TATGAAGACCAAGTGAGAGGGGAAATCACTGTGGC[A/T]GAGGTTGTGAGCTCATCGCTGTATCGTTAGAGCTG
Affx-1205094473	CM037938.1	1	9445639	A/G	A/G	F	TTTCAGTACCAATGAAAATACTTAAATTTTGTCAC[A/G]CCTGATTGATCAGTTTACTGAACAGTCAATCTTGT
Affx-1205094744	CM037938.1	1	9637135	A/G	G/A	F	GTTGAGGTGGGATGGGGGCTGGGGTTATACTATAG[A/G]CATTAATTGATGGGAAACGAAAGGGCCACAATCTG
Affx-1205179122	CM037938.1	1	9831149	T/C	C/T	F	CCTCACTGTGAGTTGCTGCACAGGTACCCCTGCCT[C/T]GTTCCACCCAGTGTGCATGTCCCTACGTGTGTCTG
Affx-1205094749	CM037938.1	1	9840092	T/G	G/T	F	AGGGAAATAGTGTAGGGTGGTGTGTTGGCCTCATC[G/T]TCTTCTTCCGGTAAAACACTTCCACACCCTTTACT
Affx-1205094753	CM037938.1	1	9868487	T/C	T/C	F	GAGGGGGAAATGCTCTGAATTTACAAATGGTCAAG[C/T]TGACAACGTTCGGTGTTTATGAACACTCCAGATTA
Affx-1205097198	CM037938.1	1	10120305	T/C	T/C	F	CCTCTATAAAATCTGAAATTGATAGCTTGTTACAA[C/T]GTGTCTGACCAAAATTGAATCACGAGTTCCTAAGA
Affx-1205097199	CM037938.1	1	10191449	T/G	G/T	F	AAACATTTTAATGTGTGCTCCCTTTTAAAATAAAT[G/T]AACTAAAGACTTGAGGTTGATAGTTGCACGTGAGT
Affx-1205097200	CM037938.1	1	10197585	T/C	T/C	F	CTGCGTCACAATATACTAAAGTTCTCGGTCTTTGT[C/T]AGGATGCTTTACCACTGCAGAGCACCAGTGCCTCA
Affx-1205097201	CM037938.1	1	10233024	A/G	A/G	F	AGGTTGAAACTTGTATCAAAAAACATTTCATGACA[A/G]TGACAAGTAGCGGGCCTACCAGCAGTTCTACCAGC
Affx-1205097202	CM037938.1	1	10239695	C/G	G/C	F	GGGACCCCGGACCCAAACTGAGCCGAGAACAATCA[C/G]ACCCGAATCCCAATGGACCCGACGACAAACAAACC
Affx-1205097203	CM037938.1	1	10252665	A/C	A/C	F	CCTCTTTGTTCCAGATTGTGCGCTCTATGGTAGCC[A/C]TACAGAGCCCTAATGACCTCACTAAACTCACCAAC
Affx-1205097204	CM037938.1	1	10258675	T/C	T/C	F	ACTGACTGTTGACCGAGCTATGTTAGAGCTGCAAT[C/T]TGATTTTGTTGCACTAATGAAAGCCCTCGTTGATT
Affx-1205097205	CM037938.1	1	10285949	T/C	T/C	F	CTCAATGTCCACAACACTCCACCCTTTTGGGGCAC[C/T]GTTATTGTCAAAGGCAGACCACATGTCATACTGTC
Affx-1205097207	CM037938.1	1	10306748	A/G	A/G	F	GTTCATAGCATGCAATAACTACACAAACTTGTTGG[A/G]TGCATTTGCAGTTTGTTTTGGTTATGTTTGGGATT
Affx-1205097208	CM037938.1	1	10314248	T/G	T/G	F	CTGTTATTTTCTTTCATCTGGCAACTTCTATGAAT[G/T]AATCAAACCTTCCATTCCCCTTCTCCTTTTCAATA
Affx-98669643	CM037938.1	1	10542277	A/G	A/G	F	CCTGCTGTAGCCTATCAAACTGGCTTCTTGTGAAC[A/G]CACAACTTTTTTATTTACTGAATAAAAAAACTGAA
Affx-1205092808	CM037938.1	1	10568148	A/G	G/A	F	AGACTGGGGCTCCTACTTGACGAAGCTGTCCAGTA[A/G]CTCCATGTGCTTGCGGTCACTGATGAACTCTCCGA
Affx-1205092809	CM037938.1	1	10576855	T/C	C/T	F	AGGAGGAGACAAGGGGAGGGGGTGATGCAAGAAAA[C/T]CAGTCATAGCAAGACAGTACTGGCACATTCAACAT
Affx-1205092810	CM037938.1	1	10590002	A/T	A/T	F	TCCATGATGATGCTAGCAAGGACGGGCTGTGCCAT[A/T]TCTGTAGTAAACAACAAGTCCATTTAAGCGTCGAT
Affx-1205092811	CM037938.1	1	10598912	T/C	T/C	F	AACAGAAGGATTCAGACCCCCTCTGCACCAGCTAC[C/T]CAGGGCTGTCTACATCCCTGGACACCAATCTCTCA
Affx-517056036	CM037938.1	1	10638654	A/C	C/A	F	TCATATTGTGAAAGTTGTCCAACATTTTGCCATTC[A/C]TTTGGCTTGACAGTGAACCGTTAAACTTCCCCAAG
Affx-1205092815	CM037938.1	1	10680490	A/G	A/G	F	GTAGTAGACTACTTGTTAACTGACTTGATCGCACC[A/G]CTTTGCTTTATCTTGGCCAGGTCGCAGTTGTAAAT
Affx-1205092819	CM037938.1	1	10818162	A/T	A/T	F	TATTTAGGGGCTTCATAGCAAAAGGGGTGAATACA[A/T]ATGCACGTACAACATTTACGTTTTTATTTTTTATA
Affx-1205092822	CM037938.1	1	10955623	A/T	T/A	F	CTGGTTCAGCAGTTTTCAACTCAAGGTAACCTAAT[A/T]TGTTCTGATATGTGAAAACAGGGTTAAGTGTTAAT
Affx-1205092823	CM037938.1	1	10965200	A/G	A/G	F	TCAACCCCTATTACCCAGACAGGCTGTAAGAGAGA[A/G]ATGGGGAAGAGTGAGAGAGAGTGAGACAGAGAGTG
Affx-1205092828	CM037938.1	1	11084791	T/C	C/T	F	TCTGAAGTACCCGCTGTGGCATTTCCCATTTCAGT[C/T]ACACTAAGCGAAAAGCAACTAGGTGGGAGCAAAGA
Affx-1205092830	CM037938.1	1	11279422	C/G	G/C	F	GCAAAAAATGTGTTTATTCTTTGTTGGACATAATA[C/G]TGTAAAAACACAAGGAAATCAGTTCCAAGTGACAG
Affx-1205092834	CM037938.1	1	11461607	A/T	T/A	F	AAAAGATTTGGCCATTTTTATTGCTGGATCAGCAC[A/T]TAACTCTACCATTGTATGTTGGTTCTTAGTGGGTT
Affx-1205092838	CM037938.1	1	11506515	T/C	C/T	F	TTGAACGTAACATACCTACTGCTGGCGTACCAGGC[C/T]GATTTGCTCAATAGATGAGCACAGCCAACCAAGAC
Affx-1205092840	CM037938.1	1	11524605	A/G	G/A	F	CAGGGAAAAGACTGTGCTGGGCTGAAGAAACGTGA[A/G]AGACAGGAAATTGAAATAAAAAGTAAAAAATAATA
Affx-1205092843	CM037938.1	1	11564431	T/G	T/G	F	ATTGTTGGCGAGCTCCCTCAGTAGAGGAAAAAAAT[G/T]GTTTCTTTCTAATATAAATGCACATGTCTTTGAAG
Affx-1205092846	CM037938.1	1	11592824	A/G	G/A	F	GCTAGCAGCTTGGTCAGGCTTTATGGTATGTGACA[A/G]TATTAGATTTTTTTTTTTAAATGGTAGGCCACAGC
Affx-1205092847	CM037938.1	1	11611292	A/T	T/A	F	AGGTTACATTTTATACTATTACCAACTGTATTTTT[A/T]ATAAATGTGTCAAATTTCTGTTCAATTTCAAGAGA
Affx-1205092850	CM037938.1	1	11655983	A/T	T/A	F	GCCTTTAATGTTCCCATTTAGATTCTATATTTCTC[A/T]TTTGTTTTTGTTTCTTTAAATCTGGCGCGTGGTGC
Affx-1205092853	CM037938.1	1	11772667	A/G	G/A	F	TTCCAAGACATTTAAATGTCCCCCTTAAACCACTC[A/G]AGTGTTTATTTAGCAATATGTTTAGGGTCATTGTC
Affx-98680432	CM037938.1	1	11866043	A/C	C/A	F	CTAAATACACTGGAGTGGAGACATTTTCTAAGTGG[A/C]ATATTTACCTTTGACCTCAGAATCACCAGTCTGGT
Affx-87958933	CM037938.1	1	11866768	A/T	A/T	F	CCCACCTGGCCAACAGAGAACACAATAAGAAAATG[A/T]CATCTTAAACCTAAGTGGTATTTGCATCAATAAGA
Affx-1205092858	CM037938.1	1	11892114	A/T	A/T	F	GTCAGCATGTCTCTAAAGGAGAGGTGCTATGAACC[A/T]CCATCTGTCTCTGAGCTGCTGGAGTTCCTGTTAGC
Affx-1205092859	CM037938.1	1	11925116	A/T	A/T	F	TAGGACTGAGCTAGATGTGTGGGAAATTTTGGGGG[A/T]TAAATGTCTGGAGATATTCCCTCTGACATGGGATA
Affx-1205092860	CM037938.1	1	12013712	A/G	G/A	F	GACCATTGATCATTTAGGCTGTGTGCATTTTACAT[A/G]GTGTGGCCTTCCTAGGATACCATTTTCCCAGAATT
Affx-1205092863	CM037938.1	1	12091795	A/C	C/A	F	TCATGATTTGAAATGCAATCAAGCATTTTAGTTTT[A/C]AAATAAAATAATGAAGTGACCCTTGAATAATTAAC
Affx-1205092866	CM037938.1	1	12160749	T/G	G/T	F	CTTAATCACAGCTTTATGAGAGATTGAAAAAAACG[G/T]ATTTATTTTTATATCATTTTATGAGACAGATAAAG
Affx-1205178747	CM037938.1	1	12199014	T/C	T/C	F	GACTAACAGAGACAACTGGGCCAGTCCCGTGCCTG[C/T]AGGCCTGTCTGAAATTGGCAGTGATCGGGAACGGC
Affx-93378556	CM037938.1	1	12269721	A/C	A/C	F	GAAATGTGACAAAATAGACATGAACTAAACAAGAC[A/C]GCAAACTCTAGTGCTATGGACAAAGATGTGTGCCG
Affx-1205092870	CM037938.1	1	12280783	A/G	G/A	F	TCAAAGTGGACAATTGGGTAATATTTGGTTGAGGC[A/G]TTCATCAATGAGATAACAACCTATATTCACCCACT
Affx-1205092871	CM037938.1	1	12285857	C/G	C/G	F	ATGGTGTATAGGCTTGTCTACCATGTGAATCTTCT[C/G]TTTGTGTCAGACGGTTCAAGTGACTTCTGTTTCTT
Affx-99005455	CM037938.1	1	12289925	A/C	A/C	F	ACAGTTTACAGCAGCACTACTGGGGACTTTAGGGG[A/C]CCACCAATCCCATGAAAACTACCTTAACAGGCCCC
Affx-1205092873	CM037938.1	1	12292946	A/T	T/A	F	CCATCAGATAGCCACGTCAACCGAGCCAGCAAGGC[A/T]GCAGGTTTCAGAGTTAAATGATATCCCATGCACTG
Affx-1205092876	CM037938.1	1	12330878	T/G	G/T	F	TTTGACTTTTATGGAACGCCTCCCAGCCTGCCAGC[G/T]GAATGACGGATGGTTCTACTGGTACGTGTACACAG
Affx-1205092877	CM037938.1	1	12335994	T/C	T/C	F	TTACCAACACTTGGGGCTAGGGTGTTAACCATAGA[C/T]GTGTCTCCTCTCCTGAATGCCATGTAGTTACACAG
Affx-1205095157	CM037938.1	1	12441370	T/C	T/C	F	ACGGGCGCCCGGTTGAGTTTGCTCGGGAAGCCGCT[C/T]ATCTACAGCGCGCAGAGCGGGCGCAGGAATGTGCG
Affx-1205095160	CM037938.1	1	12452477	T/C	T/C	F	GGCTCACAAAAGTCACACTTTTCTCAGTCCCGTCC[C/T]CAAGGTTACACAAGAACAAAGCAGCCCACATCACA
Affx-1205095161	CM037938.1	1	12460727	A/C	C/A	F	TTATTACATAAAACATATCAGAATTCCGAAGAATG[A/C]CAAAGTTACGTCGGAATATGTTTTTCTGGGGGGTG
Affx-1205095163	CM037938.1	1	12472741	A/C	A/C	F	GAATAAATATCACTGAATGTCAAAAATATTTTAAT[A/C]AATTAGGCTAATGCAATTGAAGGCAACAAATTGTT
Affx-1205095164	CM037938.1	1	12487205	T/C	C/T	F	TCCTTTTATCCTTCTTTCACTGGCAGCCAGAGAAA[C/T]GATGTGTGTGTGTGTGTGTGTGTGTGTGTGTGTGT
Affx-1205095167	CM037938.1	1	12517999	T/G	T/G	F	GCCCCATTTTAGAGGAGGTTAAAACCAGGGGAGAC[G/T]GAGGACAGGATCCATGTAATTCCATAAACGGGAGT
Affx-1205095168	CM037938.1	1	12527182	A/G	A/G	F	CTGTGTTAGTCCTGGCAGCATGGGGCTGCATAGTA[A/G]GACTTACAGGAGACATTCCTGTGAATTGACTCTTT
Affx-1205095169	CM037938.1	1	12535069	T/C	C/T	F	CAATATGATTCAGGTCTTATTTGAACACCATTAAA[C/T]GTTATGAGTATTGTAGTCACTCAATCATACAGTAT
Affx-1205092942	CM037938.1	1	12703642	T/G	C/A	R	TGCCTTGTGAAATTTGGTGTGTCGATTCTCAAACT[G/T]GTCTGAGACTCTTGACTGGTAAGATTTTTAGCGTT
Affx-1205092940	CM037938.1	1	12711851	A/C	T/G	R	TCTCTCCTCGTTGCCCAGGACAACCACCCACGACC[A/C]ATCACCTAGCCTGAGGCAGAGATCCGTTTACACCC
Affx-1205092938	CM037938.1	1	12723035	T/C	A/G	R	CTCTCTTCCTATGAGAATGCTGATGCACTGGTACA[C/T]CTTTGTGTGCAAAGCAGTGCTTGGAGTATTTCCTA
Affx-1205092935	CM037938.1	1	12736181	T/C	G/A	R	CTCGCCGACGAATTCTCACCAAGCACCCGGATCTG[C/T]GCCCCCTGTATCGGTGTCTCCTCTTCATGCCAATG
Affx-1205092933	CM037938.1	1	12754943	A/C	T/G	R	CTTGAAAATAAGAAACATCTTTGTAGAAAAAAAAC[A/C]TGTTTTATAGTCTCCAGCTGAAATTAATAGTCCCT
Affx-1205092932	CM037938.1	1	12761089	A/G	C/T	R	TAGGGCTCTTCTTTCAGGCTATATTTCCCTAAGTC[A/G]GAGCATTGCGAACCGTAGGTCGGTATTTTTGAACA
Affx-1205092929	CM037938.1	1	12818058	C/G	C/G	R	GCACATTTCAAACTAAGCGAGTGCAATCCAATGTG[C/G]TTCACGCGAAAGGAGGAAACTATGAATAGGTGAAC
Affx-1205092923	CM037938.1	1	13015167	T/G	C/A	R	CTGAACAAAGAACATCGCTGATAACAGTAGCAGAA[G/T]AATCTAGAGCAGTGTGTGTGTGTGTTCTTGTGCAT
Affx-1205092920	CM037938.1	1	13023825	T/C	G/A	R	ATGTCCTTGTCAGAGATTGCTTGTTGTTATGTGCT[C/T]GTGTCTTTCGTATTGGCGCACGACGGGTTATTTTA
Affx-1205092915	CM037938.1	1	13213001	T/C	A/G	R	CTGGTTTAGCTGTCTCCCTCCTCTGCCCTCAGCTC[C/T]GTTTCCTCTCCCCTCACCCAGGGTAATTGCTCTGT
Affx-1205092913	CM037938.1	1	13219161	A/G	C/T	R	ATCATTACCTCTAAAGGAACCAAAAACACAGCAGC[A/G]GTTGCCTCTGCTGCTCGAGAAGTCTGCATTGAAGC
Affx-1205092910	CM037938.1	1	13230957	A/T	T/A	R	TTTCCAGCTAATGTGTTTCCGATAACTACTGAGGG[A/T]GGTTTTAAAGCAAGGGACAAAGGGGGGTTCACTTT
Affx-1205092906	CM037938.1	1	13294262	C/G	C/G	R	ACAAGCTACTTTAGTTTGCTGTAGTGGTGCCAATT[C/G]CCCTGTTTGATATCAGAGAAGTTAGCATATTGCTC
Affx-1205092904	CM037938.1	1	13330647	T/C	G/A	R	GAAAGAAAGAAAGAAAGAAAGAAAGAAAGAAAGAT[C/T]AGAGAAAAGTGAGAGCTGTGACCTTGGAATGAGAT
Affx-1205092902	CM037938.1	1	13402565	T/G	A/C	R	TAGTGGAATTCGCGCGAGAGAGTAAAGGTTAACCT[G/T]TTAGGGCTAGGGGGCAGTATTGACACGGCCGGATA
Affx-1205092897	CM037938.1	1	13638227	A/C	G/T	R	TTCAATATTGCAACAATAAGGTCGGAGAGACAGAC[A/C]GCAAGGTTTATACAAATCTCTGCTGGTGAAAACCA
Affx-1205092896	CM037938.1	1	13671590	T/C	A/G	R	TGTTTTGCTCTAGGATGCCCACAGGCCTCACAAGA[C/T]TCATCTGACCGTCCCCCGGTGCAAATTTTAAAAAT
Affx-1205092895	CM037938.1	1	13695413	C/G	G/C	R	GCGTGTCGTCCTTACCAGAGGTGTAGCTTCAGCCA[C/G]TGCAGCCGGTGCAGTCACACCAGGGCCCTCGATGT
Affx-1205092894	CM037938.1	1	13738781	A/C	T/G	R	TGCTAAAGATTGCCCTCATATGCATGCGTCACAAC[A/C]CCCCTCCTACACACAGAAGGCGAAAGCATCAGGAG
Affx-1205092891	CM037938.1	1	13926912	A/G	T/C	R	ACAACAAAAAACGCTCCAGTACCATACTGCATAGC[A/G]CTGGTTTCTTCCAGCAGAGAATTTGATCAGATAAT
Affx-87989497	CM037938.1	1	13982843	A/G	G/A	F	TTACACACAAAATTGCATGCACTTGAACTCCCATG[A/G]TAATTGTTGTTGCATGAGATTATATACTCCTTAGT
Affx-1205092888	CM037938.1	1	14196238	A/C	T/G	R	TCCGCACACACACACACGCACACATGCACACACAC[A/C]CTGCGTGTCCGGAGTCCTTTAGCGAAAGCTGGTCA
Affx-1205092883	CM037938.1	1	14466134	T/G	C/A	R	AACAGTTAGTATATTTGGTCATTTTTACATGAACA[G/T]GTTTGGACCCTAATTTCATAAAGGACAGAAATAAT
Affx-1205092882	CM037938.1	1	14482567	A/C	G/T	R	ACATGAACGTCACCCGCCAGACTTGTCTTATTAAT[A/C]AAAGAGGGAATAAAAAATATTTACGTTCGTTCACA
Affx-1205092879	CM037938.1	1	14571788	A/G	C/T	R	AAATTCCATTCTTAGGGCGGAGACAGAAGCATCTC[A/G]TCAGTATCTCTGATATAGCCCACTGTAGGCGTACT
Affx-1205095920	CM037938.1	1	14727766	C/G	C/G	R	CTTCTTATATGTTTTTTTTTCACTTCGTTACGGCA[C/G]CGAAGCGACCACAACTTTTCATTGTGCAAGAGGCT
Affx-1205095918	CM037938.1	1	14733681	T/C	G/A	R	AACACCTGATCCAGATGGTGGAGATGCTCCTCCTC[C/T]GTCTCCCCTGTAACCATGTTGTCATCCAGGTACAC
Affx-1205095916	CM037938.1	1	14740916	T/C	A/G	R	TGAGGGACCTTACAAATAATTGTATGTGTCGGGAA[C/T]GGAGATGGGGTAGTCTTTCAAACAATTCAAAAAGC
Affx-1205095915	CM037938.1	1	14748806	A/G	T/C	R	TAATGATTGTGGTTAGGCCTGCCTATTGCATCTTC[A/G]ACAAAATTGCTTTCGCCCTTAAACACAGAAATTGC
Affx-1205095913	CM037938.1	1	14755183	A/G	C/T	R	AGGTAGACATTAATGATCTAGTGAGGGGGCAGTGT[A/G]TTTTGCTGGATGCAATGTAATTTAAGCCTATTTAG
Affx-1205095910	CM037938.1	1	14766759	T/G	A/C	R	ATGTTTGCAGCATTAAAAATCCGTAAGAACACAGT[G/T]GCCTCCACCATTCTTAAATGGAAGGAGTTTGGAAC
Affx-1205095909	CM037938.1	1	14803738	C/G	G/C	R	ATGGTGGGTATGAAGAACAAAATATTCAATGTTGT[C/G]AGAGGATACCTCCTCCACTGTTTCACCAACCAAAA
Affx-1205095907	CM037938.1	1	14811029	A/G	T/C	R	TGCCGCCCCAATAAAAGCTGTCCCTACGCTGCCAA[A/G]GACAGACAGGGCTGGAGAGACTGGACAACATGCTG
Affx-1205095903	CM037938.1	1	14823711	A/G	C/T	R	AGACTTTCTGTGTTTAAAATTGCTTTAATAATAAA[A/G]AAGAATCAAAGCTTCAAAAGCGCAAAGCTCTACTG
Affx-1205095900	CM037938.1	1	14836729	T/C	A/G	R	TATAATGGTACATTTGACACAGCAGTATTCTCCCT[C/T]TCCTGCCTTTTGTTTGTTTTTGTTTTTTTGCTTGG
Affx-1205095898	CM037938.1	1	14862200	A/C	T/G	R	AAAATTGTCCTCTGCTCACATTTTGGATAATTAAA[A/C]AAATATTTATACGTAAGTAATATTTATAAGTATAA
Affx-1205092447	CM037938.1	1	15060185	A/C	A/C	F	AAAGTGGGTATACCCTAATTTAGCCCAAAAAGTCC[A/C]AAACAATTCTTCCCGGCGAAGGAAAGGCACCTTGT
Affx-1205092453	CM037938.1	1	15068972	A/G	G/A	F	TCCGGAGGGCCTGTTGTCCGTCAATTCTCGGGCCG[A/G]CTCTCTTCTCTGTATACATCAATGATGTCGTTCTT
Affx-87892094	CM037938.1	1	15096097	T/C	A/G	R	CCTGTTTAACATGTTTAACACAATCAGCATCTCTG[C/T]CAGTCATCTTAGCACACATCCTGACAGAAACATTA
Affx-1205092455	CM037938.1	1	15484710	A/T	T/A	F	GAGCTAAAGGGTAGAGCTGGCGTTTTAAGGAGCAG[A/T]ACTCTAACACGGAAGCTTATAGGAAATCACCCTAT
Affx-1205092458	CM037938.1	1	15566408	T/G	T/G	F	ACACACATTACACAGAATACAGCAGCACTTTATTT[G/T]ATCAAACATTAATGACTAGGTTTGTGCTTAAAATG
Affx-1205092462	CM037938.1	1	15579146	T/G	G/T	F	GAGCCTGTTTCATCATAAAGCTTGATGGTTTTTGT[G/T]ACTGCACTTTGAGAAACATTTAAAGTTCTTGACAT
Affx-1205092464	CM037938.1	1	15584807	A/C	A/C	F	AATTTGAATTCCATTTCATTTGTATGTGTTGTTGC[A/C]TTATTAGATTAGATTAAACGTTATTGTCATTGAAC
Affx-1205092469	CM037938.1	1	15777704	T/C	C/T	F	TGGGGAGACCAATTATCACATAAGACTGGCATTAT[C/T]ATTCTTACATTCATGCGAACAAGACTTGAACGATC
Affx-1205092472	CM037938.1	1	15961230	T/G	T/G	F	GTCCAGAGTTTTGATTCAATTAGAAAAATATAAAT[G/T]TATTTGTCGTTCTTCTGGATACAAAAATGAATTCT
Affx-1205092474	CM037938.1	1	16074400	A/G	A/G	F	AAAAGAGAGTGCAAAAGAGAGCATGCGAAGGAAAC[A/G]CAATGTGTTTATGAACTGTATGTATGTATGACTCA
Affx-517056162	CM037938.1	1	16238315	A/C	A/C	F	GGAACAGGGTTGGAGAGCCCTGGGTTAGGGTAAGC[A/C]AAAATGCTCTCATAACCTTTCATGACTGTATCCCA
Affx-1205092476	CM037938.1	1	16245148	A/C	C/A	F	ATTGTATGTAATTATAGGTCATATTTAATATAAAT[A/C]TGGGGCAAATGCTGCACTTGTTTTGTTGCCTTGAT
Affx-1205092477	CM037938.1	1	16254009	C/G	C/G	F	GGACTGATTGGTTTGATACAGCACAAACTTTCTAT[C/G]CTAGCGGCGAGAATGTGATTGCGGCGAAGGTAGGC
Affx-1205092479	CM037938.1	1	16273687	A/C	A/C	F	GTCCTGTTGATAAGATAGTGTCGAATGGCACTTGT[A/C]CAGTTTGTTCTCCAGTGATTGTACGTTCGCCAATA
Affx-1205092481	CM037938.1	1	16298078	C/G	G/C	F	TAATGAAAGTTACATTACAGTAAATGGCAGTTAGA[C/G]AGTGCCCCATGGTGATCTGTGTTAGATATGTTTGA
Affx-1205092482	CM037938.1	1	16345320	A/C	C/A	F	GAAGGTGTGTTAGAGGACCAGTGAAAGCCTTTTGT[A/C]AAAAACCAACAACAATGAACTTTCATGTAAAAATA
Affx-1205092484	CM037938.1	1	16356392	T/G	T/G	F	TAGTGGAATTCTTGACTGACCTCAGTGTGGTTGTT[G/T]AACCACCAGTAGTAGGTGACTGATCCAACGTAACT
Affx-1205092485	CM037938.1	1	16529688	T/C	T/C	F	ACAGACTCCAAAGAGAGGTACTTTGACCGGGTGGA[C/T]GAGAGTGACCCTGAGTACCTCCGCAGCAGGAACAT
Affx-1205092486	CM037938.1	1	16537066	C/G	G/C	F	TGTCGCTGTAAGCTAGCCAGTGTCTACAGACTGGT[C/G]GACCTTTTCAGCTGGGCCCATTTCACCAGCTCATA
Affx-1205092487	CM037938.1	1	16542633	A/C	A/C	F	CTGCCATTCAACGAGAGATTAATCGTTTTCATACA[A/C]ATTTTTTTACTTGAGAAATACTGCACCAAACATCT
Affx-1205092492	CM037938.1	1	16580304	A/C	C/A	F	TCCAGTGTGTCAGAGTGTGCTCTGGGTCGGTAGTA[A/C]ATTCAATCTTTTCCCGTTCGTAAATTAAGAGTGTT
Affx-1205092494	CM037938.1	1	16625451	A/G	G/A	F	GCGAAGGTATTCGTGAACCTGGACGGGAGAACGTT[A/G]ATTAGTGTATTTGGAAAATAATTGCCTCTTTCCAA
Affx-1205092496	CM037938.1	1	16659901	T/C	C/T	F	CATTGGACCAACATTGTAACATGTTATTCATTTCA[C/T]AGGCTTAGGCCTACGTCATGACACTTATTGAAAAT
Affx-1205092498	CM037938.1	1	16666392	C/G	G/C	F	CTCATTTATAAAGGCCTCTCCGCACCTGTTCATGT[C/G]TTAATGCAATTCAGTTTTTGGCCTAATGCAAATTT
Affx-1205092500	CM037938.1	1	16925395	T/C	C/T	F	AATGCATAAATGTACCTTTGGTATGAAAAGGATAG[C/T]CTAACAACACTTAATAACCAGGTAACCAAGTAATT
Affx-1205095739	CM037938.1	1	17236409	C/G	G/C	R	ACATTCATTGATTAGGTACTGATTAGGTTAACTCA[C/G]GTTAAGATAGAGATTAACTTCTAGTTTAATTTATT
Affx-1205095737	CM037938.1	1	17242557	A/T	A/T	R	TTGAATAACATTCAAACCAGTCTTAATTGTAGGTG[A/T]TCACAAATTGAACATGAATGAAGCAGCTCAAATAT
Affx-1205095736	CM037938.1	1	17262874	A/C	T/G	R	CTACCGGGTATGGATGGACTTGGCCAGGAACCTCA[A/C]ACCCCTCATCCAAACACATCAGCTACGACACCTGG
Affx-1205095735	CM037938.1	1	17444665	A/T	A/T	R	TGTGTGATTGACTTCAAGCTGAGCGTGGGAAAGAT[A/T]TGGAACCCCCTCCAGTTTGTCAGTATCTCTCTCTA
Affx-1205095733	CM037938.1	1	17455292	C/G	G/C	R	TACCTGCCTCCTCCTGTGGTCCTTCGCAATAAACA[C/G]CTGCTGGGCCCTGCGCTTTAAACCAGCTCTCTGTC
Affx-1205095731	CM037938.1	1	17461613	T/G	C/A	R	CAGTACTTTTGATAGAAACGGGAGGTTGTAGATGG[G/T]CCTGTCCCCATAGGAGAATCCTCTTCGGGTCCAAG
Affx-1205095727	CM037938.1	1	17469903	T/C	G/A	R	TACCATCCACATGCAACCCACCACCAACTTTCTAA[C/T]GAATACCCCTCCTCAATCAGCATATTGTACATCAA
Affx-1205095726	CM037938.1	1	17481485	A/C	G/T	R	ACTGCAGAGTATAGTAAGTCCAACAGAAAGAATTT[A/C]ATCTAAAAGTCAAAAAGCATTTATGTTATGGATGC
Affx-1205095714	CM037938.1	1	17548650	T/G	C/A	R	AGATGAGCGTACATCAGGAGGCTTTCTGTTTCTGT[G/T]TAGACTCAGCCTGGCAGCTTTATTACTTCCAGGTG
Affx-87917870	CM037938.1	1	17565106	T/G	T/G	F	AGATCTACATTGCTTGACTGCACGTGGAGAAAAGA[G/T]GAGGGTTTTAAGCTAATATTATCCACTGAAACGTA
Affx-1205095709	CM037938.1	1	17580141	A/G	T/C	R	CCTGCAATTCCTCAGAAAAGAGAGAGATGAAAATA[A/G]GATTCCAGCCCACATGCTTGAATTACTTCTACAAA
Affx-1205095707	CM037938.1	1	17586243	T/C	A/G	R	TTAAGCAAAAATTCAGGCAACTTGCTCAACTCGTC[C/T]CAAATGTTCATTCAACAAAAAACATTTTATTTGGC
Affx-88004554	CM037938.1	1	17613153	A/G	T/C	R	ACTACACAACACCAACCATAGTGCCAAGAAGTTCA[A/G]CTTATTTCTGTCTGTATATAAAAGGCCCTGGATCT
Affx-1205095705	CM037938.1	1	17624147	A/G	T/C	R	TGGCCCGTTACCTTCATCAGCACTGCTTCAGACTC[A/G]GAGGAGGCTGCAGCACACAGAGGTAGGCCACACTT
Affx-1205095700	CM037938.1	1	17705466	T/C	G/A	R	TGGTCAGACATGTTCTCCAATCTCATAAAACATTT[C/T]CCAAAAAGTCTGTGTCATTATCCTCACAAGGGGAG
Affx-517056191	CM037938.1	1	17710809	T/C	T/C	F	TAGTGTTAAGATTTCCGTTCACTGGATCTTAGGGG[C/T]TTAGCCCGAACCACGAAAAACAGCCCCGGGCAGGA
Affx-1205095699	CM037938.1	1	17811473	C/G	G/C	R	CGGGAAAGTCGTGTTCTTTGTTGTAATGCTGGTGA[C/G]TTACCGCCGCTCTGATACCAAATAGCTCTTCCCGG
Affx-517056194	CM037938.1	1	17829862	T/G	G/T	F	ATATGCAGGGCGAAATTCACATTCGTTTAAGAAAA[G/T]ATTTTTTAAACAGACAATGTTGTGCCCATTAGTCT
Affx-1205095697	CM037938.1	1	17835840	T/G	A/C	R	CGCAGGTGGGGTATTCCGCTGTGTATATCTGTTTG[G/T]CTTAGTTTGATCTCTATTCTGGGGGGAATGTCAAG
Affx-1205095696	CM037938.1	1	17846680	T/C	A/G	R	GTTGGAAATTTACATTTTTATATTCCAGTCCTGTA[C/T]GTGGCATTATACCATTACAGTATGCTTAAATCATT
Affx-1205095695	CM037938.1	1	17867223	T/C	A/G	R	TGAACCAAAACACAAACTGTTGTCCTGAACAGCCC[C/T]TAGACTCAGACACACACAGGGCTGGTGGCCTACCC
Affx-1205095691	CM037938.1	1	18035320	T/G	C/A	R	CCGCACCCTCCAATCACTCTCCGATAAATACTGGT[G/T]GCCCACCTTGGTGCATGATGTCGCCCACTATGTCA
Affx-1205095690	CM037938.1	1	18345996	A/T	A/T	R	ATTATAATTTCCCATCATAAAAATGTATCTAAAAA[A/T]TTTTTTTACCTATTTGCACAAATTGAACGTGAGAT
Affx-1205095689	CM037938.1	1	18403928	T/G	A/C	R	AAGTAATGGTGCGTCACCTTATCATAAAAATGAAT[G/T]ATTTCATATGTGCTGTATATCTTAAACAAACCCCA
Affx-1205095686	CM037938.1	1	18433335	T/G	A/C	R	GCGTAATCAATGTGTAATTAGCAAGTAAAAAAAAT[G/T]TATGAACGCGTTAAATTATTATGTGACATGCAGTC
Affx-1205095684	CM037938.1	1	18441216	C/G	G/C	R	TAAAAACATAGCTGATCAGAATTCAGAATATGGGC[C/G]ATTCTTACAGAATTCTCCTGTACACAAAGTCAGTA
Affx-1205095680	CM037938.1	1	18457781	T/C	A/G	R	TGGAGGGATTCCAAGCGTAGAGTGGGAGTAGTGCA[C/T]AGCTCCCCCAAATCAAGGGCAGAAAGGTCTCTACC
Affx-98674987	CM037938.1	1	18466599	T/C	A/G	R	AATGGCAAATAGCGCAGAATCTTTGGTGTAGAGTT[C/T]AGTGTGAACCTTAGCCTCCCAGTCCACACACTGAG
Affx-93291683	CM037938.1	1	18482622	T/G	T/G	F	TTTTCTCATACTCGCTATAACGTTGAGCATCTGAC[G/T]TTGTTTCAAAAGTGGAATTTCAACATATTTTTACA
Affx-93395573	CM037938.1	1	18506164	T/G	G/T	F	CTATTCAAATCTGAAATTGTGCCATTCTCAGTTAT[G/T]TATGAAGCAATTGAGAGCTTGGAAAACATTAATTT
Affx-1205095677	CM037938.1	1	18524953	A/C	T/G	R	TTCTTCTGCACCCGGCTAGGCCTCTTCTTAGACTT[A/C]GGCGTAATCACACAAAACAAGCGTTAACTCCGTGC
Affx-1205095676	CM037938.1	1	18541558	T/C	G/A	R	TAGTGTCCTGGAGTAGTTCTCACCGGAGCAGTGTG[C/T]GCGCGGGCCAGGGGTGGCATGGGCATCTCTTCAGG
Affx-87926872	CM037938.1	1	18555117	A/G	T/C	R	ATTTCGACTTGACAGTAAGCTTATACAGATAATGG[A/G]CATATTCAGAGCTGAAACTTAGCTTAGAGAGAACT
Affx-1205095674	CM037938.1	1	18678660	A/C	G/T	R	ATTAAAACATTGCATTTAATAGTTCTACGCTAGTT[A/C]ATTTGTGTGCCAAGCTCTATGACATTCAATTGTGC
Affx-1205095671	CM037938.1	1	18688540	C/G	C/G	R	CATACTGCAATAACAATGGATTGGGAATCTTCATA[C/G]CGTATATGACAGAGTCGGTCCAATTCATCCATAGT
Affx-1205095669	CM037938.1	1	18693880	T/C	G/A	R	GTCCATTAAGACACCACCACAACACAAACAGACAA[C/T]TGATCTGATTCAGTCCATAAAAACACACTGTGAGG
Affx-1205095666	CM037938.1	1	18701421	A/C	G/T	R	TGATGGAATTAAATATGCATTTTAATTATCAAAGG[A/C]TAATTAGTTCTGTTAGTTCTGTGACTGTTGTGGCT
Affx-1205095662	CM037938.1	1	18709176	A/G	T/C	R	CTGGGTAAGTCTTGGTATAGTAAAGCAGTGTGATG[A/G]GAGTGTGTTTGCTGAGCTTTGTTCCCTCCCACACA
Affx-93406096	CM037938.1	1	18719546	A/C	C/A	F	TATGGAGTCTTGGCTATTAAGAACTGTTGAAGTCA[A/C]CACTTACGAGTCGGAGAGAATGTATCTGTCGTTCT
Affx-1205095657	CM037938.1	1	18726922	A/C	T/G	R	GAATCGACTCAATGTAAATGCCAACCTCTAAGTGT[A/C]ATGCCTAACACATCTCGCAGAGCTTAAAAGCACAA
Affx-1205095654	CM037938.1	1	18733926	C/G	C/G	R	ACACTCACACTGACATTCACACTCATTCACACTCA[C/G]TCTTTCAGCCCTTCAACCATACTGATAATCAGTGA
Affx-1205095652	CM037938.1	1	19336500	T/C	G/A	R	CCACTTCTCTGCCAGACTGCACAATATATCTAGTC[C/T]GACCAGTAAGTGCGGTCTAAGCAATTCCCTTATGA
Affx-1205095651	CM037938.1	1	19439743	A/T	A/T	R	GTTACATGGAGAGGACATTAGACATCAACAGAGGA[A/T]GTCATTATATGGAACAAGTCATGTTCCTCCACTGC
Affx-99004850	CM037938.1	1	19486306	T/G	G/T	F	TCCTCATCATCTTCAATGGGGGAGTGGCCCAGGGG[G/T]TGGTGGGCAAAGGAGTCCAGGAAGGAGGAGCTGCT
Affx-1205095650	CM037938.1	1	19487155	T/G	C/A	R	CTTGAGTGGAACAATATCTGTGTGGAGCATATCAT[G/T]TACCCTTGTGTGGAGTGAGATTTCAGTCTGCTCCA
Affx-1205095645	CM037938.1	1	19496510	T/C	A/G	R	ATACCATTCTAGTCATGATAAAACTACGTTAGTGA[C/T]AGGTATTACCTTGCCTTGTTTATTATGTATCTGAT
Affx-1205095642	CM037938.1	1	19501819	T/C	G/A	R	ACCACGGCATTGAAAATACCACACGTGTACCTACA[C/T]ACACAAGCTGAGAGCACTCACCTGTGTGTTGGGGT
Affx-1205095639	CM037938.1	1	19507579	T/C	G/A	R	ACCAGGTTAAGGTCTATGTTCAGGGGCTGAATCTC[C/T]TCATCATCCTCACCCAGCAGATCCTCCTTGCCGGG
Affx-1205095635	CM037938.1	1	19549504	T/G	A/C	R	ACATTCTACCTTTGATGAATAAGACCTGCTTCAGT[G/T]AATTAGACAATGGATTATTCAAATGAATCAAAAGA
Affx-1205095631	CM037938.1	1	19556253	T/G	A/C	R	AAATGTTGTACAGTGTGGAAATTCGTTCAGGAAAT[G/T]TAGAAATGTACAAAATTGATGAAAATGGTCAGAAT
Affx-1205095628	CM037938.1	1	19572800	T/G	A/C	R	TATGTCTCAGTTGTTGTATCTTATGTTCATAAAAT[G/T]TTTACACGTTAAGTTTGCTGAAAATAAGCATAGTT
Affx-1205095624	CM037938.1	1	19584716	T/G	C/A	R	CCTGTCGTCTTCTCTGAGGCTTGGATATTCCATCT[G/T]CTGTTGTCTTTCTGTCGTGGTCTTCCCATTCAACT
Affx-1205095622	CM037938.1	1	19773971	T/C	A/G	R	ACCCGTTTTCCATCAGTTTTACATGAAATCAAAGC[C/T]TTTGAAAAATGGATTCATGCCCTAATATTTTTTAA
Affx-1205095619	CM037938.1	1	19782719	A/C	G/T	R	CTGAATCTGCAAGTCTGATATATTTTATGGCAGAC[A/C]ATTCCAAAGTATAGGGGTCCTAATGGAAAAATCCC
Affx-1205095611	CM037938.1	1	19801085	T/C	A/G	R	TCAGTACCAAACTTAAACGTTTTTCAAGGCACTAG[C/T]ATTTTGTCCCATCCTAAATTGGTTTAGACATGATT
Affx-1205095610	CM037938.1	1	19806329	C/G	C/G	R	ACTGAAATATTGAAAGTGTTTCATGGTGCTCTTTA[C/G]AAAGTGTTTTTCACAGAATACGGCAAAGACTTTGA
Affx-1205095605	CM037938.1	1	19820038	C/G	C/G	R	ATAACTCCATTCATTGATTTCTGAGTGGAGCAACA[C/G]ACACACACCCACAATCACTCACACACGCACAAATG
Affx-1205095601	CM037938.1	1	19841999	A/T	A/T	R	ATTTGATTAAGTCGGTAACCCATTGTATTAAAATA[A/T]TAATGCCCGCATGATTTGCAGGCACTCGACTTCAT
Affx-1205179393	CM037938.1	1	19983136	T/C	G/A	R	TGCTGGATGTCATAGAGCAGATCCTCATGCTCATC[C/T]GTAGCAGAGTGGAAGCTGTAGAGGTCCCCGTCTGA
Affx-1205095600	CM037938.1	1	19983440	T/C	G/A	R	GCCACTGTCTCTTGGTGAACCTAAATCTGACTCCA[C/T]CCCAGATGCAACCCTTCCCTCTGCCTCTGATTGTC
Affx-1205095598	CM037938.1	1	19999968	T/C	G/A	R	CCTGACCTCTGTTGGAAGAACAGGAGTGATATCTA[C/T]ATGCTCTGTCATTATACAAAATATACAAAATATAA
Affx-1205095596	CM037938.1	1	20011684	A/G	T/C	R	GGGTAGACAGACAGACAAACGCAAGCACACACAAT[A/G]TACAGTACCTGTTTGGCCTTGGACTTGGTGATGGT
Affx-1205095594	CM037938.1	1	20030479	A/T	T/A	R	CCCTCAACCTTCTCACACTCTCTCTCCCTCCATAG[A/T]CATCACAGGGCCAGCCTCTCTGCGCCTGCTCTCTA
Affx-1205095592	CM037938.1	1	20064432	A/G	T/C	R	GTGAGAATCCTATGCACTCAAAGTGGTGACGGGTG[A/G]GGGGAAATTTATACAGAGATTTTCAAAATGAGTGA
Affx-88095683	CM037938.1	1	20071446	T/C	A/G	R	TGCAGACGGAATGTCCATCCAAGTGTTGCTGCCCA[C/T]TGGAGTCAGTAAAGCTCAAGTTGCCATTGGCAATT
Affx-1205095591	CM037938.1	1	20100816	T/G	C/A	R	CTGTCCACTTTACCTGACTGAACTGAATAGTTTGT[G/T]TTCTTTCTCCCAGTTTGTTGGCCTATACAGAGCAA
Affx-1205095589	CM037938.1	1	20110715	T/G	A/C	R	TCACGCCACTCGAAGGGAATACCATGTTTCAAAAG[G/T]TTGGTCATTATCTCTTTGCCATGGAGTGAGAGGAA
Affx-1205095588	CM037938.1	1	20147143	A/C	G/T	R	TAGGGATGTGTATGAGAATGGTAGGTAGAAAAAAA[A/C]CCAGCAAAGAGATGAGAAAGCGGCCTGGCATTAAA
Affx-1205095584	CM037938.1	1	20188694	T/G	A/C	R	TAATGACTTTTCAAATAATTTAGCTAACACATTAT[G/T]TTGGCTGATGATTTGTTGTCTACGCTGTCCTTACG
Affx-1205095581	CM037938.1	1	20214557	T/C	A/G	R	CGACATAACTACCGAAAGTTAGCTAATTTATCTAG[C/T]TAACTAAAGTTACACCGAAAGCTAGTTAATTTAGC
Affx-1205095580	CM037938.1	1	20230969	A/C	G/T	R	GCATCGTTCCCATTCGCAAAACAAAGGAATGTTTT[A/C]TAATTTTGCAAAACATGTCAAAAATATTTCTGTAT
Affx-1205179392	CM037938.1	1	20306697	T/C	G/A	R	AAATGTATCCCTTTGGGAATAACAAGAACTAAACA[C/T]AAACATTTAAGACATAATACATGTAGGGACAGGAG
Affx-1205095578	CM037938.1	1	20349428	T/C	A/G	R	AGGTAATGGAGGCTGTGAGGTATAGCCCTGACAGA[C/T]TTATGGTAAGCTAACATAGTGAGTATAATGAGGGT
Affx-1205095576	CM037938.1	1	20360740	T/G	A/C	R	GACCAGGCCCAGATCCCCGTGATTCGCTGGAAAAG[G/T]AAACGGAGGTTTCGCTGAAGGAGATCAGGGTGCCT
Affx-1205095575	CM037938.1	1	20367377	T/C	A/G	R	AAGACACATCAGCAAACATTTTAAAACACAACAGA[C/T]TCATCTCCTCTCGGTCTCATTCACTCCGTTTCTCT
Affx-1205095572	CM037938.1	1	20376355	T/G	A/C	R	ATTGTAGGATGGTTAGCTTAAGCTGAATAGTAAAA[G/T]AAATAGTATAATGCGTCACTATGCAGAGCCACTAT
Affx-1205095566	CM037938.1	1	20398053	C/G	C/G	R	CAAAGAGTTCTCCTACTGGATGTTTTCCCACATTA[C/G]ACTTCTGTGTTTTCTAGTGCTGTAGTTCTCGTTCC
Affx-1205095564	CM037938.1	1	20406137	T/C	A/G	R	CAGATGTCAACCTTGTTTTCCTTTGTTTTAGACCT[C/T]GCTGTATGTTTTCGTTCCGAGCATAGTCATTTGCA
Affx-1205095561	CM037938.1	1	20440110	T/G	A/C	R	TGCATATAATTGGTAGATTTGGATAGAAAACACTC[G/T]GAAGTTTTTAAATCTGTTAAAATGATGTCTGTGAG
Affx-1205095559	CM037938.1	1	20461070	T/G	A/C	R	TTTTGCAATTTCAGGTTACATGTAACTGATCAGAT[G/T]TAATCAGTCTGCCCATATGTAAGGACTTAATATAT
Affx-1205095558	CM037938.1	1	20471480	A/C	G/T	R	AACCTATGGCAATAGCTGAAAACAGAAGTTGGAGT[A/C]ATCCTTTAATAATTGAAGAATTAGAGCAGTTTGCT
Affx-1205095557	CM037938.1	1	20477711	A/C	T/G	R	ACCTGGTACGTACAGTACAGGAATACCGTGGCCCA[A/C]GTCCAAACACCTCATAATTACACCCTATTTTATGA
Affx-99010106	CM037938.1	1	20481819	T/G	G/T	F	TTGACCAACGGCCTTTGACACTCACGCTGCAGCTC[G/T]GTGGTACGGAGGCTCTTCTTCAGTCTCTCCACCTC
Affx-98685772	CM037938.1	1	20502366	T/C	A/G	R	ATGTATTGTGTGTATAGGCTATAAGGTGTAGAGGT[C/T]GCTGTACGCTGTAAGACTGTTTGTAATTATCTTTA
Affx-93324942	CM037938.1	1	20506713	T/G	C/A	R	TCTGAGAAGAAAGTCCAGGTAATTGCAATGACTAT[G/T]CAAGATAATGTACTGTAAATGTTTTTGTATAATGT
Affx-1205095554	CM037938.1	1	20517518	A/C	G/T	R	TAATAAAATGCACATTTACAGTAAACCTGTTGATT[A/C]AATATTTATATATCAAACACAGAGGAGAGGCTGCA
Affx-1205095552	CM037938.1	1	20538192	C/G	G/C	R	ATAATTTCAAAATGGTCTGAGAAGAACAACATTGG[C/G]AGGGCAATTCAAGCATGGACTGATGTATTGGGCTT
Affx-1205095551	CM037938.1	1	20548103	T/C	A/G	R	TTTATTAACCCAACTTTTTGTATAGTGGTGTGGTA[C/T]GAGGTGACACCTTACCCTTTAGATTTTGATTTTAA
Affx-1205095549	CM037938.1	1	20556617	C/G	G/C	R	TCTGTGTTAGATGATACTGCTGGACTCAACAAGTT[C/G]CACACACTCACCTGGCGACTGATCAGAGGTGGTGC
Affx-1205095547	CM037938.1	1	20564540	A/T	T/A	R	TTTGCTATCACAAAAGGGGTCCCGATGCTAAGAAG[A/T]ACCCTGGAATAGAGTACCTTTTTACATTTAAGTCA
Affx-1205095546	CM037938.1	1	20576499	A/G	C/T	R	CTCAAATTATGTTTTTGTAACAATATAAGGCTGGC[A/G]TCTTTCCCTTGCTGGATTCAGATGCTGTTTAGGTT
Affx-1205095545	CM037938.1	1	20585559	C/G	C/G	R	TATGTAGGCTTTAATGGGAGGGCTCTTCAATGAAA[C/G]TTGTACTTCAGAGGAGCACTAGCACTGTATCCACG
Affx-1205095542	CM037938.1	1	20601894	T/G	C/A	R	CAAAATATCAGTCCTGCTTATCTATTTGTCTACTC[G/T]AATCTATAAAAAGGGGCATTCTGTTAGTGCTGTCT
Affx-1205095540	CM037938.1	1	20815310	T/C	A/G	R	ATTCCGAAAACTCTGGGATTGTCCACTTCACCAGG[C/T]CCTCCAACCGAACAATCACCTTCTCTGACACAGCA
Affx-1205095537	CM037938.1	1	20875301	A/C	T/G	R	CCCCTAAATGCAAACACTAGGTTTAAAAGCCTTGT[A/C]TATTTCATGTATTTCTTTGTTGTGTCAGGTGAATG
Affx-1205095536	CM037938.1	1	20882144	T/C	G/A	R	CTCCTGGTTCTCCTCTTTCTCCTCAGATACCTTAG[C/T]GGGAAAACATGCCATAATGTTATTCAATACATATA
Affx-1205095535	CM037938.1	1	20910957	T/G	C/A	R	TCAGAATCATTACTAATGAATAAGGACACAAAATC[G/T]AATTTGCGACAAGGGATCCCTATGTATAATTTATA
Affx-98664351	CM037938.1	1	20925730	T/G	G/T	F	TCTGAAGCGCACTATGAACTCTGAATTGAACCATT[G/T]ATTCTCAGGGCTGTGTCACAACATGGTGTAAATGT
Affx-1205095532	CM037938.1	1	20988565	A/G	T/C	R	CAGCTATGTACTGCAAAACCTCCTCCGCCTTCTCC[A/G]TGTAACCACGGGAATACAGCCAGCGTGGAGACTCC
Affx-1205095531	CM037938.1	1	21004004	A/C	G/T	R	ACTGATAATGAAAAATTCACATTTATGTAAATACA[A/C]TTGTTAATATTTAAGATAGACGTATCATGTATATT
Affx-517056249	CM037938.1	1	21156183	T/G	T/G	F	CTGGCCTTCCGGAACCGGCTGTTGAAGGACTCTGT[G/T]TGCCTGCAAAACTGCACACTGCAGGAGAGGTCACT
Affx-1205095529	CM037938.1	1	21262653	C/G	C/G	R	TTCATAAGGCTATCGCTTAGCTAGCAACATAGTTC[C/G]CTCACTAGCTAACGTTAGCTAGCTCATCTGAAACA
Affx-1205095528	CM037938.1	1	21267608	T/G	A/C	R	ATAGCGTATCTCATTAAAAGCTGTCGTGTTATCCT[G/T]TAACATTAATATCTCCACTACACATTTGAATAACC
Affx-1205095526	CM037938.1	1	21276510	A/T	A/T	R	TCAATGGTGGGGGAGGTTCTAAGGGTTATGCTAGA[A/T]GGTGATAGGTTAGCCAATTAAAACAATGGTTGTTT
Affx-1205095090	CM037938.1	1	22706257	A/G	C/T	R	TCGCTGGAAGCACCTTTGGCAGCATTTACAGCTGA[A/G]ACTCGTTTTGTATAAGATTCTACCAACGTTGCACA
Affx-1205095088	CM037938.1	1	22713319	T/C	G/A	R	GTTTTGACCCTTGCCTGTCCCAACTTTGAGCCCGC[C/T]TGCCTGACTACTCTGCCTGACCCTGAGCCTGCCTG
Affx-1205095087	CM037938.1	1	22721049	T/G	C/A	R	GGGGAAATGAGGAGCGACAGGTCCATTAACTAGTC[G/T]TTTCCTTGAGGAAATATCCCACCTGAGCGAATGTG
Affx-1205095084	CM037938.1	1	22731412	A/G	C/T	R	AGTGCATGTCAGAGCGAATACCAGGCCATGAGGTC[A/G]ATGGAATTGTCTGTAGAGCTCCGAGACAGGATTGT
Affx-1205095082	CM037938.1	1	22739283	T/G	C/A	R	TAGGGAGGATGGAGTTATGGTCAAATTTTCTAAAT[G/T]GAATTGTTTGTGTGTGGTCAAAAGGACCACATCAT
Affx-1205095075	CM037938.1	1	22753855	T/G	A/C	R	GCTAGAGGTTTCGTCGCCTGTCTTTTGGGATTATC[G/T]CAGCCCAAAATGAGTTTCAGTGAAAGATCGACGAG
Affx-1205095074	CM037938.1	1	22760027	T/C	G/A	R	TGAAGAAATTGTCCACGCTGACATTTCTCCACTTG[C/T]CGGCGTAAGGTTCCACAAGCCTCATCACCACATTC
Affx-1205095072	CM037938.1	1	22767825	A/C	G/T	R	GGTTCACAAAAAATGTCATTGACGAGCGCTTGTTT[A/C]AAAAAAAGGCACGATATAGCTAAATAGCCAGCTAG
Affx-1205095069	CM037938.1	1	22782418	A/G	T/C	R	ATTATGTGGGTTTAATGCAGAATAAAACATTTAAT[A/G]AAAGTCCCATGGTGGTAGTGACTGCCCATTGCTGC
Affx-517056283	CM037938.1	1	22793763	T/C	C/T	F	TCCGCCTTGGCTGCCCTCCCAGTTCTCAGAGTAAC[C/T]CTCCGCTGTCCGACTCGGCTCCGCGTGGTAAAGAA
Affx-1205095067	CM037938.1	1	22800872	T/C	A/G	R	TTTGGTCTCCAGTCTAGGGCTACAGAAAAAACACA[C/T]AGGCTACTACTCTTTCTACTGTAGGCTACATAGGT
Affx-1205095063	CM037938.1	1	22814244	C/G	G/C	R	TAGAGGATGTACTAGATGTCTCTGCCAGCTCTGAA[C/G]CGTCCTCTCAACCAACCCCTCATCATCTCTAATGG
Affx-1205095060	CM037938.1	1	22824575	A/G	T/C	R	ACACAATCTATTTTACAACATGTATTCTTTTGTTT[A/G]TTTTTACTCCTATACTTCCGCAACCCCTCCCAGTT
Affx-1205095058	CM037938.1	1	22831057	A/G	T/C	R	CTAGTTAAATACTTTTTTTTATTTTTTATTGCTGT[A/G]AGTTGAGGTGACTCTGAAGGCCTACAGTACTTGGC
Affx-1205094258	CM037938.1	1	23086663	T/G	T/G	F	ATCTACCCTCCACTACACCACAACTAGTAGTAATG[G/T]GCAGTTTGCAAACGATTCATTATTTTTGAACAAGC
Affx-1205094261	CM037938.1	1	23197875	T/C	T/C	F	TTACTGTAGCTACAGCCCTGTGCCTGTCAATATGG[C/T]TGATATGTGCGACTTGACTAGATTTAGTGGTGCTA
Affx-1205094262	CM037938.1	1	23229704	C/G	G/C	F	GATAGAATGACAAGCCACCCAAAATAAATCAGACT[C/G]CGCCAATACTTTCCAATGTCCCCAAAATGAATAGG
Affx-1205094264	CM037938.1	1	23364916	C/G	C/G	F	TCCACCTGCACACAAGAACGACAGTGTTGGAAGTA[C/G]AACTATATCAGCTAAAACACGATCTACAATGTCGT
Affx-1205094265	CM037938.1	1	23435840	T/C	C/T	F	GCGTGTATCAATACCATCACAGCTGGATTTAGCTG[C/T]TACTAGTGCACTGAATCACTTCTGACTTTGTGTTG
Affx-1205094266	CM037938.1	1	23448511	C/G	G/C	F	TTTTCTCTGTGGAATTAGTTTATCTGTAAACTGTG[C/G]ATCGCTGATGCTGTGTGTTGGCCAATGAGAGGCTT
Affx-1205094041	CM037938.1	1	23566429	T/G	T/G	F	AACAGAGAGGGCAAAAGTCTACGGGTGCAGATCCA[G/T]CTACCTGTGACAATGGTCCATATTAAACTACATAC
Affx-1205094042	CM037938.1	1	23601128	T/G	G/T	F	ATTTCCTTTGCAATTTTTGGTAGAAAACCAATAGA[G/T]TCGTGTCATGATGAAAAGACCTTGTGTGGTCATCA
Affx-1205094043	CM037938.1	1	23612994	T/C	C/T	F	TTGTGTGCTGGTCTACCTGGACCACCTCATTGTGT[C/T]TGGGAAAACCTTGGAGGAACATAACGAAAGGCTGA
Affx-1205094044	CM037938.1	1	23627049	T/G	G/T	F	TGTCCCAACGCCCTATTAACCTCTTATTAAGACAC[G/T]TTATGTTGTTGTTTCCTTTATTTGGCCTGTATGTG
Affx-1205094046	CM037938.1	1	23638457	T/G	G/T	F	TCAGTTGATTGGTGAAGCTGACCTTTGTTTTGAAG[G/T]AAGAAAATAAAACAGTCTGTTCTCTGACCGCCCTG
Affx-1205094047	CM037938.1	1	23646545	T/C	C/T	F	GTACAGCTAACCTTGACTGGAACTGTTAGGCAACA[C/T]TTTGAGAGGTGATTCTGAATTGAAGATTTTACAGT
Affx-1205094049	CM037938.1	1	23655467	T/C	T/C	F	CATTTAGTTACAGCTGTATTGGATCCACTCCGGCT[C/T]TCGTTTTCAATCTTGTGCTGCCTTTCTCTAAATTA
Affx-1205094051	CM037938.1	1	23683426	T/G	G/T	F	GGGTGATTTTGCCACCAAATGGTCGTTTTAGCAGT[G/T]CGGGTGTGATTTAAATTGTGCAAATGACATGAAGT
Affx-1205094052	CM037938.1	1	23701247	T/G	T/G	F	TGCAAATGAATGTGTGCTAAATGTTAGGTTTTATT[G/T]AAATGTAATTTGTTGAATTTAATTTCGGACATTTG
Affx-1205094054	CM037938.1	1	23716824	T/C	C/T	F	AGCTGTCCTGCGGAGGTGTGTTTATGTCCAAAGGT[C/T]TGTTTTGATTGTTGAACTTGTTTGTATTATTCTGT
Affx-1205094055	CM037938.1	1	23759960	A/G	G/A	F	GTGGATGGGCAGGAATGTGGGCGGAGATGAAATGC[A/G]GAAGAGTTGGGGTTCTCACTAAAGCTGTGTGGGAA
Affx-1205094058	CM037938.1	1	24058320	T/G	T/G	F	CATCTTATCCTGGGTTATCAGTTTCCTGGTTCATT[G/T]TGTAACTCTTACACTTCAACACTAATACTCAAGGC
Affx-87977127	CM037938.1	1	24109176	A/G	C/T	R	TAGCAGAGGAGAAGGGTGAGGTTAGGGGCCCTAAC[A/G]AGAGCTTACTACAATGCCATTGCATGAATGACTTG
Affx-1205094059	CM037938.1	1	24121019	T/C	C/T	F	GGTTTTTCCAGTTGTTTGGGCACACAAACAAAATT[C/T]GAGGCAAGCCAAAGTCAGTAGCCGAAGTCTACACC
Affx-517056309	CM037938.1	1	24146851	T/C	T/C	F	ACCTGCCGCCCCATCTCATGTTTACTTGGTCAAAG[C/T]CCAGAAAATATACTGTCTATATACTTTCAGTCAAG
Affx-1205094063	CM037938.1	1	24190820	A/G	G/A	F	GCTACAGACCAATTAACCATCTGATAAACAACATA[A/G]GTCCTTCCTGTGTTGCCTTGCCAACCTACCATTTG
Affx-1205094064	CM037938.1	1	24223918	A/C	C/A	F	ACTCTAAATAGTTATTGATTCCAAATATAAGACTG[A/C]TTTTTGATTGGCAATAGCATTTGATCACATAAACA
Affx-1205094065	CM037938.1	1	24240172	T/C	T/C	F	TGCAGCAGGCTGAGGAGCCGTGGAAGGGGCCCTGG[C/T]ACTGGGTGCAGAAGTCAAAGGCACAACTAAAGCGG
Affx-1205094067	CM037938.1	1	24273752	A/T	T/A	F	GTTTAGGTTCCTGGGGGTCTGGTTTGACACTTGAA[A/T]GACATGGGCGGAGCATATTAACAGAGTAGTTGTCA
Affx-1205094071	CM037938.1	1	24292779	A/C	C/A	F	GGGGTTTGTTCACACCCCTCTTGTTGGCAGAGAGA[A/C]ATTTTTGCAGTTATAAAGTGAATTTCCTTCAATTC
Affx-1205094076	CM037938.1	1	24314208	T/C	T/C	F	CTGTGGACTTGTTATTCACCATGCGGTTTATTGTC[C/T]CTCTTGTCGCCACAGATACATACTTCATCCCTGTG
Affx-88124140	CM037938.1	1	24323383	A/T	T/A	F	TTCCTAAATCCACCACAGTTAAAAACCAAAAAATA[A/T]CAGAAGATGGGGAGGAACAGACTGGCTACAGTATA
Affx-1205094078	CM037938.1	1	24323803	T/C	T/C	F	CACAGTTCTAGGGCTTAGCACACTGAGTGGGTGAG[C/T]GGATGGCGGGGGGGGTCAGTGTGACTTGGCGTGCT
Affx-1205094085	CM037938.1	1	24334836	T/G	T/G	F	AGCACAGATGTGCAGACACCAGGAGGAAATTAAAT[G/T]ATTAATCTACAGGTTATAACCTGCTGGAGAATAAC
Affx-1205094087	CM037938.1	1	24342245	A/C	C/A	F	AATAGAGTTGATGACAGCCGTTACACCTGAGGGGG[A/C]GAGAAAACGCATCTGGTGTTTTCTCCTTGCTTCAA
Affx-1205094088	CM037938.1	1	24370806	A/G	A/G	F	TCTTGTCAGCTTAGTAGTCTGTCCCTCCCAGTCCC[A/G]TCGCTTCTCTTTCTCTCGCCTTCTCTCCATCTCCA
Affx-1205094090	CM037938.1	1	24398031	T/G	G/T	F	TAACTGTAAAGAATAGGAAAACTTGCATGTGATTT[G/T]ATTATGTTTCTTTCAACCTCATCTTGTGTAGTAAG
Affx-1205094093	CM037938.1	1	24405565	T/C	C/T	F	AAAAAGGAGACAGTTTTGAAAACGTGTGTAAGCAG[C/T]TGGAAAACTGTAAATGAAACCATTTCATTCTATAC
Affx-1205094095	CM037938.1	1	24412685	A/C	C/A	F	TCTAATATTGGCAACCTTAGCTAGGTTTCCATCCA[A/C]TTGGCGACTGATTTTCATCTGAATATTCTAAAATC
Affx-98989663	CM037938.1	1	24442539	T/G	T/G	F	CATTTGTTGGCAGTTGGCAAAAGTTATTTTAAATT[G/T]AAACTTATTTGAGAAGAAATAGGGAGAAAAATTCC
Affx-1205092167	CM037938.1	1	24668082	T/C	T/C	F	CAGTGTTTCAGGAGTAATGTCTATAAGTGTCAGAG[C/T]GGTGAGTCCTGAGTGAGTTACAGTGGCTGGCTGGT
Affx-1205092169	CM037938.1	1	24678511	A/T	A/T	F	TGTTCTACTGCAGATATAATACACAAGTATATACA[A/T]ATGTGCAGCACAGTGTGTGCCAGTTTTACGCACAT
Affx-1205092170	CM037938.1	1	24689263	C/G	C/G	F	CTTATTTAGCCAAGTAAGTTATGGTGAGCAAAATT[C/G]TCTTTGACAGACAGACTAAATGGTTGTTTCAAGAA
Affx-87952929	CM037938.1	1	24958106	T/C	C/T	F	TGTCAGGGCTCCACATACAGTTGAGGTTTTGGAAA[C/T]CCTCCTGGCAGGGCCGTCTCTAGCCGAGATCTCCT
Affx-1205092176	CM037938.1	1	25056325	C/G	G/C	F	GCTACACAACCTTCAAAGTATCCCCAAAAGTCAAA[C/G]ATTTGTTTTAAAAGACGCACCACTCTTGCAGTGGA
Affx-93453268	CM037938.1	1	25062819	A/C	C/A	F	GTGCCTCTGTGAATGTCATTTGTTCGCAATGGAAG[A/C]GTCATCGACAACACCGTGATAGGCATGGAGGTTGG
Affx-98660569	CM037938.1	1	25063627	T/C	C/T	F	ATGTATAGCTTCATGACTTAGTATTTCACCAAAGG[C/T]TGTGAAATACGCCCAAAAGAGTTTCACATCTAAAC
Affx-1205092181	CM037938.1	1	25229100	C/G	C/G	F	AAGGTCAGGGGTTAAAGGTCGTGGTCTCAGGGGAT[C/G]AGGGCTTGGAAGAACACACATCAAAATAGGATTGA
Affx-1205092182	CM037938.1	1	25241912	T/G	G/T	F	TTGATGTGATAACAATAAATATAATGATAAGTTTA[G/T]AACGTTGATGTGCACCACATTTTTTTGTAATTATC
Affx-1205092185	CM037938.1	1	25267978	C/G	C/G	F	CTAGCACATAATGCCTTAATCCCAAATATTTACCA[C/G]AAAAACAAGCCAATCAAATTCATGGTTACTCAAAG
Affx-87918466	CM037938.1	1	25569962	A/G	A/G	F	ATTAACCACGTAATCTGAGGGGCTGCATACAGTGA[A/G]TTATTTGTAATTTTTCACCCTATACTATTAGGGAA
Affx-1205092189	CM037938.1	1	25625012	A/T	T/A	F	CTCAGTTGAAGCTGACGTTTATCTCAAAGAGTAGC[A/T]TCTCAAAAAACAACAGAAATAATACCACCAAATCA
Affx-1205092190	CM037938.1	1	25640851	T/C	T/C	F	CAATAGAACACAGCATTAGCTATGGTACAACGCAT[C/T]GAATTTCAAGAAAATAGCTTTACAACTGCTAAATG
Affx-1205092192	CM037938.1	1	25725090	T/C	T/C	F	CAAGTCAGTTAAGAACAAATTCTTATTTTCAATGA[C/T]GGCCTAGGAACTAGAGGGTGACCGATTTTATGATT
Affx-1205092193	CM037938.1	1	25741522	T/C	T/C	F	ACATATAACAAACTTAGAACAAAATACATTATGGA[C/T]GTATTTGACAAGTTTGGGGTCAATGCAGGAAGTAA
Affx-1205092198	CM037938.1	1	25829600	A/G	G/A	F	TCAGACAAGGAAATTATATACATAATATCTACCAT[A/G]TGGGTGCCACATATTGCTGATGGAAAGGGTGAACT
Affx-1205092199	CM037938.1	1	25841316	T/G	G/T	F	GTTACAATACATGGTACATTTTAAGTCAAGATTGA[G/T]GATGGGCTAAAGTATTTTAACTTACCGTAATTTCC
Affx-1205092203	CM037938.1	1	25904440	A/C	A/C	F	TGCGATATGACTGTGCTGTCGCCTGTCGATGTCGA[A/C]CCTGGGTTGGTGTCAACACCATTTCACTTCAGTTT
Affx-1205092205	CM037938.1	1	25927233	C/G	C/G	F	TCTGTAGTGCTGACAGTGTCATGAAGGAGAAGTAT[C/G]TTTCTGTTTCTCACCTGCATTGTCATTCATTGTTT
Affx-1205178656	CM037938.1	1	25991799	A/G	A/G	F	CCAACCTAAAGATTAGGGCCGGCTCACTGGGTGAC[A/G]AACTGCCTCTATACAAGCACATTATTAGTAAGAAC
Affx-1205092206	CM037938.1	1	26002929	A/G	G/A	F	AGTCAGGGGGAGGTTAGACTTTAATTAAAAAGATA[A/G]TAGCTGGAATCTCAAATTGAGACTGCTGATATGAT
Affx-1205092208	CM037938.1	1	26087607	T/C	T/C	F	TTTCCACCAGAGTTTCATTTAGCTCTTATAAAACT[C/T]GCTCAGTCAGAACCTAACCCCAAGGCGCTGAGAAA
Affx-1205092209	CM037938.1	1	26092803	A/C	A/C	F	GGTTGAAAAGCCATAAAACATAAGTTCTCAAAAAC[A/C]GGTTATGGTCAATAATAGCAAAGGCATTGAAATCT
Affx-87907521	CM037938.1	1	26100944	A/G	C/T	R	GTATGTATGGGTGCAAATTCTACAAAGAAATATCA[A/G]AAGGACGCTAAAGGCACTTATTTTGTGTAGCCTGA
Affx-1205092210	CM037938.1	1	26110209	T/C	T/C	F	TCGAGGTGCCCCAGATGCACAAATGATGTGTTTTT[C/T]GGTAAGGAATAATTTATACTTATAGCCCCCGCCAA
Affx-99004131	CM037938.1	1	26140800	A/C	A/C	F	ATATTAGATCAAAACAGTCTTACCCAACTTGATAC[A/C]ATCAGTACATTCCTACATTATTGTGTGTAGCCAGA
Affx-1205092211	CM037938.1	1	26145017	C/G	C/G	F	AACTCCCTTCCATCTCAAATTACACAAGTAAACAG[C/G]AAAATGTCCTTTAATAAATAAATAAAAAGCTCACA
Affx-98995921	CM037938.1	1	26188724	T/C	T/C	F	GATTAAAATCTTTTTACAAATGTTATACAGGAGTT[C/T]AAAACGGCTGGCTCCTCAAACACGGACACCAGCAA
Affx-1205092213	CM037938.1	1	26191016	A/G	G/A	F	AGCTGGACAAGAGCGCCTCCATCAGTGTAAGTACC[A/G]AGCACGAGTTACTCTTTGTGTCAGTTTCACAGACA
Affx-1205092214	CM037938.1	1	26204910	A/G	G/A	F	TGTTTTTCCAGGGCCTCTCTCTTTCCTTTCGCGCA[A/G]TCCAGTTCAATGTTCTTACCTTGGAAGCGCCTTCT
Affx-1205092217	CM037938.1	1	26265783	T/C	C/T	F	TACTGAAAAAAGATATAAACACAACATGTAAAGTC[C/T]TGGTCACATGTTTCTTGACCTGAAATAAAAGATCC
Affx-1205092221	CM037938.1	1	26564150	T/G	T/G	F	ACCTCCGAGCACTTTTCATATCATACATGACAAAT[G/T]ATGTTATGTTTCTGCTTGCTTCAGATTGTTTTCAC
Affx-1205092223	CM037938.1	1	26733594	A/C	A/C	F	AATGTGTTTCAAACAACTGTTTCAAGATTTGACTT[A/C]AATTTGTTTTGTTGCTAGGCACTTTGTTGCTAGTT
Affx-1205092224	CM037938.1	1	26773617	C/G	G/C	F	TCTTGTATATTGTTAGGTAAAATATATATTTATGA[C/G]AATGGTTTCAAGGTTTATTCCATTTCACCTGGCAA
Affx-1205092226	CM037938.1	1	26815098	T/C	C/T	F	ACCAAAATCCTATTTTCTAATACGAGGCCCTAATA[C/T]ACACTTTTGTATGTTTTATGTTATTTCAATTTACT
Affx-1205092228	CM037938.1	1	26825513	C/G	G/C	F	ATTAAAGTACATAGCCCAGATGCGACTGAACCATA[C/G]CACTAAAACACAAATTGCCAATTTGTACGGCTTTT
Affx-1205092230	CM037938.1	1	26832003	T/G	G/T	F	GATATACATTATTAGTATGTGGTTGTTACTGCTAT[G/T]CGAGGGAAACGGTTTCTTTAGAGCCTACCGTACCT
Affx-1205092232	CM037938.1	1	26841024	T/G	T/G	F	TTCAGGATTATCTGTAATCATGGTAGCATCCACAT[G/T]ACTGTACAAGTGATTAGAAACGTATTGTATTTCTA
Affx-1205092234	CM037938.1	1	26847573	T/C	C/T	F	TCCTAAGAAAATGCCATTCTCTGACATTTCCACTT[C/T]GCAAATGTGGACATCCTGAATAGCTAATATCACAA
Affx-1205092236	CM037938.1	1	26853564	C/G	G/C	F	AATTGAAATAACAAAGTGATTCCCAGCCCCAGTTT[C/G]GGTAAAAAGCTTAGGGATGGGGCTGGAGAAATGTA
Affx-1205092237	CM037938.1	1	26858671	T/G	G/T	F	GCACTGTTCAATTATTTAGTCATTTAAACAACTTG[G/T]TTTTTTTTATGAACACCCTCCGTTTTGCCATTGCC
Affx-1205092239	CM037938.1	1	26864261	A/C	C/A	F	AATATTTTAAGAACTTCCCACAAGAACACTTTACG[A/C]TTTTCAGAAAAAACAGCAGTGTGCAAAATCACTAA
Affx-1205092242	CM037938.1	1	26981995	A/T	A/T	F	AGTGTTAAAAAGCACTATTGGGTGCTAGAAGGCAA[A/T]ATAAGATCTTTATAACGTCTTCACATCTTACCAGA
Affx-1205092243	CM037938.1	1	27103886	A/G	G/A	F	AATTTCTGGGGATGTGTCCTCTGGATTGGCTGTGC[A/G]TTCTCATCCAGCTGCCAGGCCATCCAAGTGCTAAA
Affx-1205092244	CM037938.1	1	27110572	T/G	G/T	F	TATCTGACAAAAGAGAAGAGGATGTAACGAAGGAG[G/T]AATGTTTATCTAGGATCAGGTCCCCCAGTTCATAT
Affx-1205092245	CM037938.1	1	27200317	A/C	A/C	F	TGTCTAACAATTTGCATAACGCATTACAGGCATCA[A/C]AAGCATAGCTATGTAAATTCCGTGACAGTGAAGCT
Affx-1205092252	CM037938.1	1	27272456	T/C	T/C	F	TTGGGGCTTCCTGCTGTTGGGGCCTCCGGGCTTGG[C/T]ACGCTAGGCTCCACGGCCCTCTCCCTCCCAGCCAA
Affx-1205092253	CM037938.1	1	27286555	A/C	C/A	F	CATATGAGCTATGTACGGGTGCAATGATCTGTAAG[A/C]TTCAGATGCTTAAAGTTGATGCTTAAAATTAGTGA
Affx-1205092255	CM037938.1	1	27297464	T/G	G/T	F	TCGACTCCTCCTTCAGAACACATTTAGCAAACTGG[G/T]TAAATTTTTTTATGGGCATTTCAGTTTTCCCCAAC
Affx-1205096016	CM037938.1	1	27481288	T/G	C/A	R	CGGAATCGTGATGCATAGGCAATTTACTGTGCTTT[G/T]ATTGACGACCGAACACCAAATGTTGACTAGTTTAT
Affx-1205096013	CM037938.1	1	27594775	A/T	T/A	R	CTTAATTTAATAGAAAATGTTGAAACTCAAACCTA[A/T]AATGTGATGTATTTCGTGACCGAATCAACTGTAGA
Affx-1205096011	CM037938.1	1	27741732	C/G	C/G	R	AGGACAGATTAGAGGGGGGTAGTGAAGGCAATTTA[C/G]TAAATTTAGAGTAGAGGCAGTCGGCATGTATTACT
Affx-1205096010	CM037938.1	1	27747192	T/G	C/A	R	CTTTACTTAGGTTATACATTTAACATCAATTAATT[G/T]TATAATTACTTTTTTGATACAAGAGATTATTCAGT
Affx-1205096008	CM037938.1	1	27771660	A/G	C/T	R	GGTTTGACTTTACCCTCTCCAACCAGCCGGGATCT[A/G]AGAATGTAAAGGCCGATGCGTTGTCCCGGGTGCAT
Affx-1205096005	CM037938.1	1	27958978	T/C	G/A	R	TTCTCGTGTGAAGAATGGTGTGAAGAATGGTGCCG[C/T]ATCCCTCCAATAGAGCTACAGACCACTTGTAGAAT
Affx-1205096004	CM037938.1	1	27987959	T/C	A/G	R	AGAATGTCTGTCAAATGTGCAGAGAATTAAACTCA[C/T]GCCTAACTAACATATGTTTCTGTTAACCGGTCCCA
Affx-1205096003	CM037938.1	1	28009971	T/C	A/G	R	ACACACACACACACAAACAAATGCACATGCACACA[C/T]GCAAGCCCACAAACGCATACTCACACAAACACACT
Affx-1205095998	CM037938.1	1	28035641	A/G	C/T	R	ATGGATAAGGGCTGGAAACAATGAAGTTCATTGAT[A/G]CCCACGGACACTGACATTTCCTCGAGAACATGATA
Affx-1205095997	CM037938.1	1	28042816	A/G	C/T	R	AGACAGAGAGTGGCTTGGTGAGAGGAACTACACAC[A/G]CAGATACACACACACACACACACCTGATTTGTCGT
Affx-1205095995	CM037938.1	1	28064933	T/G	C/A	R	GGTCCAATAACAACCCCTTTGTTTTTGTTTTCAAA[G/T]AACTTTATTACCTTTTTTTTCTTATGGTTTGCCTA
Affx-1205095992	CM037938.1	1	28098607	T/G	C/A	R	AGAGCGAGAGAGCGAGAAAAATAAAGAGCAATGGA[G/T]AGGGAGAGTGGACTGTACTGCTGGGACTTAATGAA
Affx-1205095989	CM037938.1	1	28114947	A/G	T/C	R	TCTCCAATAGTAGCAGCCAGTAGATCTCCTTATGC[A/G]GCTCAGTGGTTTCATGCCAAACTTTTACATAAGAG
Affx-1205095985	CM037938.1	1	28247777	T/C	G/A	R	AAAGATAACCCAGAAGGAGCTGCAAAGCTCCACAG[C/T]GGAGATTGAATTATTTGTCCGTAGGACCGCATTAA
Affx-1205095980	CM037938.1	1	28389732	A/G	T/C	R	TGCGACAATGTGCACAATAGTGAAAAGTAGCATAA[A/G]GTCCAACGGTCAACAGTCTTATTTTATACCATAAC
Affx-1205095978	CM037938.1	1	28411335	T/C	A/G	R	AAAATTTGACTGTTTTTACCAACCTAATGGTAATT[C/T]TATTTGAACGATAAATCTCTTGATAAACTGGGTTA
Affx-1205095977	CM037938.1	1	28417822	A/T	A/T	R	CCCAACACCTCAGACTGACAGCTATTGACAAAACA[A/T]CCACCACAGCAAATCTCTAGTTAGCTAGCTATACT
Affx-1205095975	CM037938.1	1	28497802	A/G	C/T	R	CACTCCCTCTCCCCCTTCCTCCCTCTCCTTGATGC[A/G]TAGTCAGACTCAACTCCATTCAAGGAATACTGCGA
Affx-1205095974	CM037938.1	1	28510965	C/G	G/C	R	GGGAAAGACCCGTGGCTAGGTGGTAAAAACAGCTG[C/G]TGGCTGTCGCATATTAGGAAATAAAAAATACACTG
Affx-1205095973	CM037938.1	1	28538722	T/C	G/A	R	ACTGGGAAATGGATAGATACAGTATATTTGAAAGA[C/T]TACAGGGATGAAGCAAGGTTCAACTTCTAATCTGC
Affx-517056722	CM037938.1	1	28574935	T/G	T/G	F	GGACATGACACATCAACTAGATTCAGCCATGTGAT[G/T]ATTTTTTTGTGAGTGAATGGTTGGGGTTCCGGAAC
Affx-1205095972	CM037938.1	1	28600791	A/G	T/C	R	TTTTATTTTTTTATCAAAATAACATTTAGGCTAAT[A/G]AAGTTATTTCAAATGGCATATATTATGCAGTATTA
Affx-1205095970	CM037938.1	1	28627196	A/T	T/A	R	TAGGAGGAGCAACCCATGGTGTAAAAAACAAGTAA[A/T]TTTTTTTTTTTTTACAATGGATAAAAGCAGAGACA
Affx-1205095964	CM037938.1	1	28762415	T/G	A/C	R	ATGTAATTCCATGACATTCAAAGGAATTCAAAACA[G/T]GAAAGGCTTCATCTTTGTTTTGTATGCATCTTTAA
Affx-98680155	CM037938.1	1	29439305	A/G	C/T	R	CGTTCTCCAGTCTCGCTCAGATCGGCGTCGAACCA[A/G]CCACAAAATCTGTTCTCCTGGTTCCAGTTGCTCTC
Affx-99000341	CM037938.1	1	29452706	A/G	T/C	R	GCCAACCATTTCAAAAGAGAAAGCCTTGGGAATGG[A/G]TGGGGAAGGATATAAGCGGCATATCCTATAGGAGC
Affx-1205095957	CM037938.1	1	29463946	A/G	T/C	R	TACATTCACAATGATTCGAATAGTTCAAAAAGTAA[A/G]ATACTATAGAATGAGTAGAAGTGGGTTCTAGCAAG
Affx-1205095955	CM037938.1	1	29471449	T/C	A/G	R	TAAGTGCATCTGATGTTCAGCAGCTTGGAGATGGC[C/T]GACAAACTGAGGTGTCTCCTGAGTTGCTTGCCGCG
Affx-1205095954	CM037938.1	1	29501637	C/G	G/C	R	ACTTCAGGGGGCCCCCCACTGAACTGAATTACAGT[C/G]TTAATCTCGGTCTCGCCTCCGATCCTGGGAGACAA
Affx-1205095949	CM037938.1	1	29532417	A/G	C/T	R	ACGTGAGATCTGGGAAAACAACATCTCCTTACATC[A/G]GTACCAATCAGAAGACAGGATGGAGTTTATTGGCC
Affx-1205095948	CM037938.1	1	29577984	A/T	A/T	R	AATCCAATTATAAGATAATACACCCGTATATATAT[A/T]TTTTTTTCTCCCATTTAACTAGAGACTACTTCAGT
Affx-93368826	CM037938.1	1	29617089	A/C	G/T	R	GGTAGTGTAGTCTTCTACTGGACGTTGACAACAGT[A/C]TCGTGGATAGACTCGGCCACATAGTCGATGTTCTT
Affx-98987224	CM037938.1	1	29618831	A/G	C/T	R	CAGATACTGATAATAGTGCAATAACAACAGAGAAC[A/G]ACCGCTTCGGAACAGACTGATTGGACATTCACATT
Affx-1205095947	CM037938.1	1	29621076	T/C	A/G	R	AAAGAAGGGATATGCAATATTCACAATCCCAAAAA[C/T]GTAGGTTGCGTGTTACCTAGATTTGAACAGGTATT
Affx-1205095946	CM037938.1	1	29727140	A/C	G/T	R	CACGCAGTGCATCCCTGTCGGTTAACACCACCCTC[A/C]CGAACAAGATAGGATGCTTTTTTTCATTTATCATA
Affx-1205095941	CM037938.1	1	29761811	A/C	G/T	R	ATTATGAATGTGCTATGTCAAGTATAACTGTATTT[A/C]CAAATATAAAATGGTTAGTGTCATGGTTGCACGGT
Affx-1205095939	CM037938.1	1	29775824	A/C	G/T	R	ATTGGCCATGTCATCTTAACCCATTTACAGAGCCA[A/C]ACAGTCTGATCCCATGACTACTGCGAGGTTCAGGC
Affx-1205095936	CM037938.1	1	29789499	A/G	T/C	R	GGAGTGAGGCATCATGGGATAGCAGCCCTCCTTCA[A/G]CGTGACCTCTAGGAAGACTCTGCTAGGGTTCGAGG
Affx-1205095935	CM037938.1	1	29853324	A/G	C/T	R	GTAGCATAGCAGCAGGGGAACAATAGGATAGTTGT[A/G]GGTCAAGGATGGAGTGCTGACCATAGGGGCTGACT
Affx-1205095934	CM037938.1	1	29862490	A/G	C/T	R	AAAATGTGCTAACTCGGAGCATCCAACAATGGGGT[A/G]TGGTGATGATGCTGAATACAACAAAAACGCATGGA
Affx-98998123	CM037938.1	1	30050098	A/G	T/C	R	CATTTACAAGCCAAGTAATGTGTTGTCTTAAAAGC[A/G]GTAGAACCACGCTTGGCCAGTGAATTCGTTTTCAT
Affx-1205179454	CM037938.1	1	30051089	T/C	G/A	R	TTTTTGTGTGTGTTGTGTAGTTTGCTAAGCAGGTC[C/T]CTGGGACGCCATTGAGTGACCAACAGACACTGTAC
Affx-1205095933	CM037938.1	1	30064940	T/G	C/A	R	TAACTGTGGTACAACTACCAAAGGAACAGAAATCA[G/T]CAGCTGATCAAACACTCCGAGCATGCTTATTGTCA
Affx-1205095932	CM037938.1	1	30101162	T/C	A/G	R	TGAGATTCCAACCATCCTAGTTTACCCCTTTTTTC[C/T]GCAGTGATTTATATTCTCAAAGTGTGCTGGTTTCT
Affx-1205095930	CM037938.1	1	30108979	T/G	C/A	R	AGAAGTTAGAATTTTTAACGCCTCTCAGAAGCGTT[G/T]ATTGGATTGAGAGTCTCCTGTAACGCCGGTTGTTG
Affx-1205095929	CM037938.1	1	30122851	A/G	C/T	R	TCAGTGGAAGTGTTGTATCAGTTTAAGTGTTTGAC[A/G]GTTATGCCAATGCAAGTTGAGTACCTCCTTGGTCA
Affx-1205095927	CM037938.1	1	30135777	T/C	G/A	R	TGGTAGTTATTATAAGGCCTTCGTTATAGTTAGAC[C/T]TATGTACTGTACTACAGCGAGTGTACAAAACATTA
Affx-88008699	CM037938.1	1	30217487	T/C	G/A	R	AACAGGTCTCATTTCCTCCAACCACTTATCCTTGT[C/T]CTGTTTGCAAAGACAGCTAGGCTAAAACAAATATG
Affx-87962836	CM037938.1	1	30233125	T/G	C/A	R	AATTACGTTTACCTTGCAAAAAGAGGAACGCTTAA[G/T]GATGGGTCCTTAACCTTGCCTTCTTTTAGCTAACT
Affx-87909937	CM037938.1	1	30251619	T/C	T/C	F	GGGGTTGTAGAGAGATACGGTCAAAGGGAATATGG[C/T]AGTGACTGCAGGCGTACCAGCCATGATGCTCGACA
Affx-1205095926	CM037938.1	1	30261377	A/C	T/G	R	GAGGCATGGTTCCTGAGGAATTTGACAATATCATG[A/C]TCTTGAATGCTCACCAAATCAACACATGATAAAAC
Affx-1205095924	CM037938.1	1	30278702	A/T	A/T	R	AGCTTGGTTATAGGCTCCCCATGCTGCTGCCGAAG[A/T]GTTGGAAGGCACCCTGAGTGGAATGGAGATAAGCA
Affx-1205095923	CM037938.1	1	30284308	C/G	C/G	R	TCCAATACATTTTATTCCTTAATTGGCACAAACAA[C/G]GGTATTCTGGGTGCACATTTGTCAAAAATTATTAC
Affx-93293061	CM037938.1	1	30292024	T/C	G/A	R	TTCCCTAGTCTACAAGTCCTCATCATTGATAGAAG[C/T]ATCTCTAGCTACTTGATACCACATCTTCTATAATT
Affx-1205091173	CM037938.1	1	30322451	A/C	A/C	F	TTCCACTCATTTGCTTTTCCCAATAGCACTGACCC[A/C]AAAAAAGCTTTTATGGGTTGCTGGAAATAACACAG
Affx-1205091174	CM037938.1	1	30327323	T/C	C/T	F	TTCTGCGGCAGCTCGCAAGGTGCACTGCAATATGA[C/T]GCAACTTTTAAAGGAAGAACCACTGTACATACCGG
Affx-88045094	CM037938.1	1	30336373	A/G	G/A	F	GCATAGGCCTATAAGACATGACAAACACATATGGG[A/G]AAAAAAGTGCTCGAAACTCACTCAATTGAATAATT
Affx-1205091178	CM037938.1	1	30344599	A/G	G/A	F	ATGGAGGCGCAGGTGGGTTTTGTTGAGTAAACAGC[A/G]TCTAGGGCAGCCAGGTAGAGCTGCTTGATGGAGGA
Affx-1205091180	CM037938.1	1	30355982	C/G	G/C	F	GCATGCATAGCCATGCATTGCAACACAGTGGGAAG[C/G]GTTCTGATGTCGAAACAACCTAAGTGCCTGCAATG
Affx-1205091182	CM037938.1	1	30370282	A/G	G/A	F	AACTAAAAGTGCTGGAGGACAAGCAGGGGCAAATG[A/G]CGACAAAAAAAGTCAAGCGTTTCCATTTTTCTGCG
Affx-1205091184	CM037938.1	1	30401377	A/T	A/T	F	CAAATGCCATCGGAGGGCAAATGTGCAGGCAGCAT[A/T]TGTTTTCAATTGGCAAGATGGATTAGAGCGATGCT
Affx-1205178590	CM037938.1	1	30410828	T/G	T/G	F	CTTACCGCAAGTGCTTTGGACAGTCTTGTACGGAA[G/T]TCGTTGAGAACGATGGTGACAATGTCCTGGTGAGG
Affx-1205091185	CM037938.1	1	30456153	T/C	C/T	F	ACCTCAGTATTGTGCTGACTCAATTCTTTATGCCT[C/T]TCAACATCACCTTGGTTGAGGAACAGTTTGCAACA
Affx-98661748	CM037938.1	1	30462373	T/G	G/T	F	TAAGCACGAGCAGACACTCACAAAATTGCGTTTTC[G/T]CGCAAAAGGGACTGTTGATCTTCTGCGGGTGTTCC
Affx-1205091186	CM037938.1	1	30466959	A/T	A/T	F	AATAGCAATAGACTACCATTGAATTTAAAAAAAAT[A/T]ATTATTCCAAATTGCTATGGGACTTCTTCAATTCA
Affx-1205091187	CM037938.1	1	30477707	A/T	A/T	F	CCTAAATTGTCCATACCAGTCTTGATCACTTCTCC[A/T]TAGAAAGTAAGCTATTTTCCTATTGATTCTCTATA
Affx-1205178591	CM037938.1	1	30537599	T/G	G/T	F	CACTGTATGATGTCTTCCCTAAAGTACCTGATGGT[G/T]TTGACGGTATCAATGCAAATGTACGTACATGATGA
Affx-1205091190	CM037938.1	1	30544798	T/G	G/T	F	ACTCCAGGTCCTGCTTTTACTGATGTTTATTTGAT[G/T]ATGCAAATTTTGTGTCTATTTTTTTACATCATTAT
Affx-98671611	CM037938.1	1	30614137	T/G	C/A	R	TTCATTCCATTATAGGACTTTTTTACCTTCAAGGC[G/T]TGCTTTTCATCCTCATCCTTGCTGTTCATGATGGC
Affx-1205091191	CM037938.1	1	30688438	A/T	A/T	F	ATGATTACTCATCTTGCATGCAGCTACCGTTAGCC[A/T]ATGGTTACTGTTATGGCTAGCAGCATACTGTTATA
Affx-1205091194	CM037938.1	1	30741237	A/G	G/A	F	CTCACATATAGCACCTTAAAAAAAAGTAGTTCTTC[A/G]TTGTATGTTCCTAATGTCTTTAGATTAGCAGTTTG
Affx-1205091195	CM037938.1	1	30756850	A/G	G/A	F	CCTCAGTAACCAGCAGCAAAGTAACTGTGACCACT[A/G]CCAAAGCAGGGACGGTACTCCCGGAGTACCAGGCC
Affx-93297001	CM037938.1	1	30797487	A/C	G/T	R	CACTGGTTACAACAGAAGAGCCTTGTTCATTCTTT[A/C]ACTGTGAATGCTAGAATAGGTTTCAACAATGTCCG
Affx-98661194	CM037938.1	1	30824726	A/G	A/G	F	TTCAAGAAAGGTGGCAAATATATTATATATTAAAT[A/G]AAGAGTTAATAGCTAATAGCTAATAATTAGTTAGA
Affx-87933867	CM037938.1	1	30839367	C/G	G/C	R	CGCCTGCATGTTGATGGTGGTCCTCTTTGTCTTTG[C/G]CCTCTGCTACCTGCCCGTCAGCGTCCTCAACGTCA
Affx-1205178592	CM037938.1	1	30870267	A/G	G/A	F	AACTGCCCACACGCGGCTAACGCAACACTAACCTC[A/G]CGGCTGTAGTGTGCCCACGTTGCACACCCTGGGTA
Affx-87987756	CM037938.1	1	30909202	T/G	T/G	F	GTCAGACTCCCTCCTGAGTCACTCCAATCAACGAC[G/T]CATTCTGAAATCCAAGCATAGTATTGCAACTGAAC
Affx-1205091197	CM037938.1	1	30913375	T/C	C/T	F	AGTAAGTCCATGATTGGAAGAGATTTAATAAAGGT[C/T]GTGAATAAAGGACTTAAATCCACCAGAATAACTTG
Affx-1205091198	CM037938.1	1	30971557	C/G	C/G	F	CTGTAGCTTTCAGCAGCTTATAAGTACAACCTTTT[C/G]ATCTTGACCTCTGGAGACGGAAAAAAAAATATACC
Affx-1205091199	CM037938.1	1	31092319	A/T	A/T	F	TGATCAGTCCTCCAAGTTGATCTCCATCAGTGGAG[A/T]CAGACACCTGAATCTTGTGCTCCTTTCCTCTGAAA
Affx-1205091201	CM037938.1	1	31116963	A/G	G/A	F	ATGAATTGGAACGCCTACTACGAGCAGGCCTAATC[A/G]CCCAACATCAGTGCCGACCTTACTAATGCGCTTGT
Affx-99009868	CM037938.1	1	31167306	T/G	C/A	R	ATCCCTGTGTGCGTGTTCTCTCTTGACAGAAGGTG[G/T]CAGAGTACCAGAGAAACTCTCGGTTTTGCCGGCGG
Affx-1205091203	CM037938.1	1	31180394	C/G	G/C	F	CATGCCAGAATCATGCAGTATCCCTCACTACCAAC[C/G]TATCAGCGGCTATCTGCCAGCTGGAACAGATAATG
Affx-1205091204	CM037938.1	1	31221017	C/G	C/G	F	AAATTGTTCAATAATACACACAAATAACAAAAAAG[C/G]CTGTTAAACAAAATATCAGCTGTAATTAAACACTA
Affx-1205178593	CM037938.1	1	31298104	A/G	A/G	F	GAAAGTCAATTCACATTCAAGGGGAATAAAAGCGA[A/G]AACGATTTCCATATGTGTTCTCTCAATGTTTGGGT
Affx-1205091209	CM037938.1	1	31312002	A/T	A/T	F	TAACAAGTGGAGTCTACACATTGCTTCTTCCAGCC[A/T]AGCAGCTCTTCACGGTGACTGGCTACAGGGATATA
Affx-1205091210	CM037938.1	1	31323770	A/C	C/A	F	GGAGAAGCACAGTTACTCATTGGGCTTGTTGTCTT[A/C]TAGACAATGCACCCAATGCACATCCTGAAAACCCT
Affx-98678306	CM037938.1	1	31332555	T/C	T/C	F	GGCATGCAGGGCAAAAGGAGACTTTGTTGTCTCCG[C/T]GGGTTGTTAGCTTGAGAGAAGAAGTCCTCAAATAC
Affx-88121782	CM037938.1	1	31335093	A/C	G/T	R	GGAGAGCAAGCTAGCTAGTTTTGAGTTTCGGTTTG[A/C]ATGTGGGTGTAGCCTTAAAGTTACATGTCATCAGA
Affx-87903823	CM037938.1	1	31576651	T/C	C/T	F	GTGAGGCCAAAGTAGCTAAATGTGTTGTAAAGAAT[C/T]TGGATATGAATGTTGCCTAAAATAGATGAAATGGC
Affx-87902950	CM037938.1	1	31674617	C/G	C/G	F	AACCTGTCCTTAGGCCCCCCATCCACTGCACATAT[C/G]ACTACACGTATTTGATTGATTGTAGTTCTTGTACA
Affx-1205091217	CM037938.1	1	32032447	T/G	T/G	F	TCCCAAAGACCCAGTTGTACTGTGAAATAAAAATT[G/T]AATAAAAGACATGACACAAAACGCAATACAAAGCA
Affx-1205091218	CM037938.1	1	32214093	A/G	A/G	F	AGTGCTGTAAAAGGCAATATATCTGCACAATCTTC[A/G]CCCTATGGGTGATTCTCTAGTGCGGTGTATAATGC
Affx-1205091223	CM037938.1	1	32223765	T/C	T/C	F	GTATGAATATTTTCTGAAGGCACTGTACATGTGGC[C/T]ACTTGATGAGCAGTATGAAACATGTGACTGCATGT
Affx-1205091226	CM037938.1	1	32230167	A/G	A/G	F	GCAAAGTCCACAAAGTAGCCTGTGATTGGGCTGGC[A/G]CCGGTGTAGATGGGAGCCTTCCACTCCACCACCAC
Affx-1205091228	CM037938.1	1	32235057	A/G	G/A	F	TGAAATTCCCTGTGAACAGTATCATTCAAGGACCA[A/G]AGAGCTTTTTGAAAAATAGAAGAATATGGCTCATA
Affx-1205091232	CM037938.1	1	32252619	C/G	C/G	F	TATCATTAAGTTATTTATTGTTTACAGGAAGGGAA[C/G]GTGCAAATCTTGGGGCAGATCGAGATCTGCTTCAA
Affx-1205091235	CM037938.1	1	32263136	A/G	A/G	F	AATGCCAGGCCCTGGCTGTGACCCCACTCGGAAGG[A/G]GTCTCAGGGAAAAGTGTGCAAAAGAAAATCTGCAT
Affx-87954262	CM037938.1	1	32280393	T/C	T/C	F	AGGCCTAATGCGGGCTGGATTTGGTGTAGCTAGGC[C/T]ACTTGCTCATTTGTTTATTAGGGACTATTATATTT
Affx-1205091238	CM037938.1	1	32283411	T/C	T/C	F	CCATGAAATGAAGGGTAGTTTTCTTGAGGGAGAAT[C/T]TGGTACTAAGTCAGGTAGACTCATCAGACAGATGG
Affx-1205091239	CM037938.1	1	32304258	T/C	T/C	F	GTTATCATAAAGTAGATGGGTTTAATGCTTTATTA[C/T]GTGTTATGCAATGGGTGGGTCTACGGGTGGCATTG
Affx-1205091241	CM037938.1	1	32338397	A/T	A/T	F	AGAGTTTGTCTGTACAAACATGTTTACACAAAAAA[A/T]TTTACGGTGTCACAACAACTCTTGTGTACTTATTT
Affx-87886676	CM037938.1	1	32341099	T/G	G/T	F	TACAAGAGGCTTTAATAAGTATCACTTCTGTCAAT[G/T]GAAACATTGTTAATTTAGTTAGAAAAAATAAATTG
Affx-87886681	CM037938.1	1	32354749	A/G	A/G	F	TTGATCCCTATATGTCTCGATCTCTTCCCTTGTTC[A/G]GTAGCTCAGAAAGCATCTCTGCATGGAACATTTTC
Affx-1205091243	CM037938.1	1	32361351	C/G	G/C	F	CAGCTCTGATCGATTATGCCACGCAGGTCTGTGTA[C/G]AGTATGGCTTGTCAATGCAATAGAATCCTACTCCG
Affx-93376887	CM037938.1	1	32363564	T/C	C/T	F	CTCTATTCTCTGAAAAAATAGTTTCCTCAGCAGGG[C/T]CACAGCATGCACCCCACAGCTTTCATCTCGGTTAC
Affx-87962566	CM037938.1	1	32395219	T/C	C/T	F	GCTCGTGGGTTGGACATCCCAGAGGTAGACCTGGT[C/T]GTGCAGTGCTCACCCCCAAAGGTAGACAAATACTG
Affx-87962569	CM037938.1	1	32398567	T/G	T/G	F	TAACATATGACTGTCATTATTATCACTGGGCTATA[G/T]TCCGTCATTGAGATGTTTACTCTTGATAGCTTTCT
Affx-1205091248	CM037938.1	1	32415789	T/C	C/T	F	TGTTCATTCTGAAATGTTTGTATGTTGTCGATCAT[C/T]CTGTACTCATTAACACACATCTCAAACCTTTGTGT
Affx-1205091249	CM037938.1	1	32424474	A/G	A/G	F	TGAACACATGAATTCTGCTGAATGATTTAGCATAG[A/G]TAGTTAGCTTGCTAGCCTAATGTTAGTTAGCTAAC
Affx-88121768	CM037938.1	1	32437495	A/G	T/C	R	TGGGAAAATAACTACACTTCAGTTACCTAAATCAG[A/G]TTAAATACAATCTTACACAGCCAAGCATCAATAAC
Affx-98677194	CM037938.1	1	32463529	T/C	C/T	F	TGCACGTTGTATCACAGAATGAAGCCGACGTTGAC[C/T]GTCCTCTGCAAAGTGTTACCAGGGAAAAGATTGAT
Affx-1205091252	CM037938.1	1	32465321	T/C	T/C	F	AGAGAGAATACGTCATTTAGAAGGCTTTTTGCATA[C/T]TGTGGCAAATGGGCAATTCCATGCTAATGGAATTA
Affx-98666900	CM037938.1	1	32470325	T/G	T/G	F	TCCTTTGTATACCTGCTCAAAAACAGATAGTCATT[G/T]TATGGGAAAAAAGGTGATGTAAAAATCCAAAGTAG
Affx-93444869	CM037938.1	1	32472060	A/G	A/G	F	TTTCTATTTCTCCAAGCTGCAGGAGGACCAAATCA[A/G]GAAGGTGAGACATTTCTGAGATGTCAAGTGTTGTA
Affx-93333361	CM037938.1	1	32486041	A/C	C/A	F	TTCGGTCCATTGGCAAGATATAACAGCTTTGTAGG[A/C]CTATGTAGCCAAATTTTTATCTATGATTGTATGCT
Affx-1205091253	CM037938.1	1	32493958	T/C	T/C	F	ATAAAAAGGAATTTGTCAATTAAAACACCAGCCAA[C/T]ACTGTTTATAGGGAACCAATGTGGATGTCCTGGCC
Affx-88049160	CM037938.1	1	32494963	T/C	C/T	F	CGTGTCCTTCAGGTCAGCTAACCTCTGCGCCGCTG[C/T]GCTGGCTGCCATCCTCACCCGCATCCGCGAGAACA
Affx-98683187	CM037938.1	1	32498793	C/G	C/G	R	AAGCCTTTTTAAACGATCATGTGTTAGGGAAAATT[C/G]CCATAAGCATAATCAAGTATAATGCATATCTCTTT
Affx-1205091254	CM037938.1	1	32513554	A/G	A/G	F	AGGTTATTCATTCTCTGAAGGTTATTTGTGTGGAT[A/G]TCTGAGATGTGCTGCAGCATGACTCGTAGTGCTAA
Affx-1205091256	CM037938.1	1	32538689	T/C	T/C	F	AATTGTGTGCCGTCCTATGGGACTCCCGTCACGGG[C/T]GGTTGTATTAGCTTCAGTTTTGAAGACAGATCATA
Affx-1205091257	CM037938.1	1	32549644	A/T	T/A	F	GATGCCAAAGGGAATATCAGCTGGTTCACCAAGTT[A/T]GCCAGCTAAAGTTGATAAACATTCCTAAATTAACT
Affx-1205091259	CM037938.1	1	32572220	T/C	C/T	F	GTCTGTCTCTATTTCTGGTAGCTGATTGGGGGGTT[C/T]ATCCTAGCCATCGGTATCTATGCGGAGGTGGAGCG
Affx-87880092	CM037938.1	1	32598958	A/C	A/C	F	AGGTAAGAGTTAACCACCATGACATTTCAGACTGA[A/C]ATCTGATGTCCACCAACAATACACAAGTAATGATT
Affx-87923913	CM037938.1	1	32614323	A/G	C/T	R	TGACATTGGAACAGAGAGTGGAGTGACTCAAAACA[A/G]CAAGCTGGAGTGAGGGCAGTGAGCGAATTTACATT
Affx-98681048	CM037938.1	1	32629859	A/C	A/C	F	ACACCTGCAGAGCAAGACCTTGCATTAGCTGAAGC[A/C]GAAAGCAACAAGGAAAAGTCTCAAGTATTTGGAAT
Affx-1205091260	CM037938.1	1	32656071	A/G	A/G	F	ACGTTAGCAATACTGTGCATAAAACTTACAACCTC[A/G]CTAAAGTACTAGCTAGGCCTACATGTGGAATTACA
Affx-1205091261	CM037938.1	1	32661572	A/G	G/A	F	ATAAGCATGATGAAGTGTATTGCTGGTTAGGGTAA[A/G]TTTCTGAAAACCCTGTGAAATCGTAAAAAAAGAAC
Affx-1205091262	CM037938.1	1	32670616	C/G	C/G	F	CATCTTACCGATCCAGGGAGCAGCTTACTGCAGTG[C/G]TGCTCACGTCTGTGACGTATCCAGCTGCCACACCA
Affx-98680772	CM037938.1	1	32670671	A/G	C/T	R	CGGGCTTGATTGTTGGCGACAGAGTTGTGGTGAGC[A/G]ACCATGATTTGCAGCTAATTGGTGTGGCAGCTGGA
Affx-1205091263	CM037938.1	1	32710197	A/G	G/A	F	TCCGCCCGTTTCCTTGCAGCAAAATAATGTTTTCT[A/G]ACTTTACAGAACATCCTCGGCATTACCATTCTGTA
Affx-87954232	CM037938.1	1	32847607	A/G	G/A	F	AGTGTGTGTGAGGGAGAATGCCATATTACTCTTAC[A/G]AAGTTGTCTGTCTGTAACCCTTCTCTCTGTCGGTC
Affx-1205091264	CM037938.1	1	32967756	T/C	C/T	F	CGCAATATCTTGTCAAATATTATCCCGATATGTAA[C/T]GGTAACCCCCAAAAATGTATCACTCGTTCTCTCTA
Affx-517056780	CM037938.1	1	32984151	A/C	C/A	F	CTACATAGTACACTACTTTTGAGCAGGCCCCCCCC[A/C]AAAAAAACCCTGAACCAAACAAATCTTCATGGTGC
Affx-88002239	CM037938.1	1	33019755	A/G	C/T	R	CTGGACTGTACTGGACAGACCAAACAAATCAACTC[A/G]AGCATCTGGGAGTGTGACGGTGACTATGCGTTAAT
Affx-1205091265	CM037938.1	1	33042680	A/C	C/A	F	TCTTAACTGACTTTCCTCGTTAAATAAAAATAATA[A/C]AAATTTTAAAAAGTAACGTTAATTGTAAACTACAT
Affx-1205091268	CM037938.1	1	33155213	A/C	C/A	F	GGGCGGTATGTAAATAGAAATGGGTCTAGGGTGAC[A/C]GGTAAGGTGGAGTTGATATGATCCTTGACTAGTCT
Affx-1205091273	CM037938.1	1	33188058	A/C	A/C	F	GAGAGAAATAGATAGTTGTCAGGAAATATTTGCCT[A/C]ATTTTCTAAGGGCGCATCATTGATTTTGGCATTGT
Affx-1205091278	CM037938.1	1	33261155	T/C	C/T	F	GTGGACTCCAACACAAACAGCGAATCTGTACATGA[C/T]GTTTTTATAAACCCAACTACTTAGCAGGAGTCCTC
Affx-98681294	CM037938.1	1	33265147	A/G	C/T	R	GCTGAACGTTTCTGGTGAGCCCTCTCCTTGGCCTG[A/G]GCTAGAGACATGCTGAGGGCTAGGCCTGCATCAGA
Affx-98680720	CM037938.1	1	33266030	C/G	G/C	F	CATTCTATCTTTGTGTAAAGTTGAAACATTCCTGA[C/G]TTAACAACCTGTCCAAACCAGTGTTCAATCACACC
Affx-1205091279	CM037938.1	1	33276787	A/G	A/G	F	TCTAGAGACAGTAGCAGGCATCTGGTGATTTACTG[A/G]CTTGGATGTTATTGTTTTCTGTGGACTGGCTGGTT
Affx-98667970	CM037938.1	1	33276906	T/G	T/G	F	TGCGTGTATTTTGTGGGCTGGCTGGTATATGGATA[G/T]TTGCCCGTGTCTGTTGACTGGCTGGTCTTGATGAA
Affx-98662703	CM037938.1	1	33277283	A/G	G/A	F	GTGTGTGCGTCATCTTCGCTGGGGGTAAAGATCTC[A/G]TCCAGTGTGTGTGTGTCCCGGTCTTTGGGCTGACG
Affx-1205091281	CM037938.1	1	33290744	A/G	A/G	F	ACACAAACACACACAATTTCTGAGCGTGTCTTAAC[A/G]AATGCCCAGAGGGGCCAAAAACAAATATCAGACAA
Affx-1205091282	CM037938.1	1	33396894	T/C	T/C	F	TAAAGAAAATTGAGAAATAATAGAAAAGTAAAACA[C/T]GTAATAATAAAAATAACGATACACAATGAGTAATG
Affx-93415280	CM037938.1	1	33406602	A/G	G/A	F	CTAACAGCCCTCCTGTTAAAGTAATAACGCGTCTC[A/G]TCCTTTTAGACATCAAAAAAAGTTTCCAGATTAAT
Affx-1205091284	CM037938.1	1	33412321	A/C	C/A	F	ACGCAAAACATGGGTACAGTATGTGTGCATAAATG[A/C]ATGCAGGTGCGCGCGCGCGCACACACACACACACA
Affx-93420711	CM037938.1	1	33426388	T/G	G/T	F	ACATGGAGGGGAACAGAGGATGCATACGCAGAAAA[G/T]AACCTCATACCTACTGTCAAATATGGTTGTGGATC
Affx-98998836	CM037938.1	1	33459942	T/C	G/A	R	TGTTTTGTAATGTACAATCCAAGGGTGTGTGACAG[C/T]TGAATTTACTTGGTGAGTTATTAACACTACCTATA
Affx-1205091288	CM037938.1	1	33461303	A/G	G/A	F	CAATGAGAGCTGAAGAGAGAAGCCCAATTCGGCTG[A/G]AAATCTGACTCCCTCCAGCAGGTGGCGTTTTTTAG
Affx-1205091289	CM037938.1	1	33479442	A/T	A/T	F	ATTTATTAGTCTCTAAATCATGTTTCATTGACTTT[A/T]GTCTTTCAAATATGTTTTCAATCAAATCAAATGTA
Affx-1205091292	CM037938.1	1	33496090	C/G	C/G	F	CTTCAACTGTTGCCCAGCATGTTAATGTTCAGTTG[C/G]TGCAGCCATATAATCAGATATGACTTCTGTGCACA
Affx-1205091294	CM037938.1	1	33505099	T/G	G/T	F	TGAAGTCAACACTTTGTTGGTTTCTAATGCAGCTG[G/T]AACCATTTAGTCACTTGTTAGTACACTTGTAAAAA
Affx-1205091298	CM037938.1	1	33548544	A/C	A/C	F	GAAAAGGCAGGCTGAGTGGGAGGGGAGATTATATT[A/C]ATGAGTTTGCCTTGACTGACAGCTCTTTGAAACAC
Affx-1205091300	CM037938.1	1	33562581	A/C	A/C	F	ATGAAACAAGGGCCAATTTATGTCTACATAATGTT[A/C]TAACAGTTTTTTTTTTTGGATTTTCTACACACAAA
Affx-1205093622	CM037938.1	1	33923817	C/G	C/G	R	CCACTATTTTCATGCACGGTGCTTGCGTCGTGATC[C/G]TTTACCAATAATGTGGCTGAATGTAAATAGTTGAG
Affx-87930757	CM037938.1	1	33925943	T/C	C/T	F	TCCCTGAAAGCTGGAAAAAAAACAAATTCACCCTC[C/T]CCTCCACCCAAAATAATATTTAAAACAAATTGGAT
Affx-1205093620	CM037938.1	1	33947844	C/G	G/C	R	GGTACATCTTTTATTGCAGTATAACAACAAAACAT[C/G]TGTCAGACCCGCTGGTACTGATTGGTCTGTTCCTC
Affx-1205093619	CM037938.1	1	33954907	A/C	G/T	R	CTGGGTTTAAACAAACATCTTGTATTTTCAGAAAG[A/C]GAAAAGACAGAATAGCAAAGTCTCTTTTTTAATTT
Affx-1205093617	CM037938.1	1	33988301	T/C	G/A	R	CTGTCAAAATTAAAATGCCCTTTTAGTGTAGGAGC[C/T]GTTTGAAAAGACCGCTCGTTTGCAGTTGTCCACTC
Affx-1205093615	CM037938.1	1	34001782	T/G	A/C	R	GGAGAAGGGCGACATTCTTTCTCTCTCTGTGTGTG[G/T]GGGTGGTTTACCCTCTGATTATATGCATGATGTGG
Affx-1205093614	CM037938.1	1	34016877	A/G	T/C	R	CATGTCAAACGATGTATAGCATCAATCTTTAGGAT[A/G]TTTTTATCTTAAATCTTAAGTAATATTCCAACCGG
Affx-1205093612	CM037938.1	1	34042170	C/G	G/C	R	GTTAACTTCTTCCGTGACAACAACAATGTTGATTA[C/G]CATTTGAGAAAACTCCACAATGTCTGGTTCAATGA
Affx-1205093610	CM037938.1	1	34059611	T/G	A/C	R	TCTAGGACCAATCAGAACTGTTAGAATGTTTTTCC[G/T]TTTTAGAAATCGGCGGGGAGATACTCCGATCCAGA
Affx-1205093608	CM037938.1	1	34099406	A/G	T/C	R	GTCTCAGAGACATGTATTTCTGTATTCTGACATGG[A/G]GTAGAGGGCATTTTAGTACGCCATCTGGTAACGGT
Affx-1205093605	CM037938.1	1	34118358	A/C	T/G	R	TGACGACACTGTCTGCATGCACTATACTTATCTAG[A/C]TCCTTTCCTAGCATATCTTTGCTCCATGGTGCACC
Affx-1205093602	CM037938.1	1	34132784	A/C	G/T	R	TATTATTTTAATAACTCTGCACCCAAATAAGACCA[A/C]ATTTTGTTGGTCTGGGCCGGAACAAATCTGAACCA
Affx-1205093601	CM037938.1	1	34137956	A/G	C/T	R	GGGGTTTGGTTTGGAATGGGTCCTTGGCCTTGGAG[A/G]CTAACAGTGAGCTCTAGGGACGTCTACTCGTATAA
Affx-93300531	CM037938.1	1	34140870	A/C	T/G	R	GACCTCCATACAAAAACTCCTCTGCTGGAGAAGGC[A/C]GATTTTGGTCCCAGTTACAATATCCCTCTTGCTTT
Affx-1205093600	CM037938.1	1	34204921	T/G	A/C	R	TCTTTTGTTCCATCCTTCCTCTACAGAAGGCTGTC[G/T]TTATTCCTGTGTTTGTTTTTGGAGCAGGGCTTTAA
Affx-93335579	CM037938.1	1	34236540	T/C	A/G	R	GCGGAATCAACACTGCTTGGTGTTGTTACTCAACT[C/T]AGTTCATTTCACAAACAAACTGTGACTTGCAGGTC
Affx-87982405	CM037938.1	1	34647906	T/C	C/T	F	GGCCAATGTGGGAATCAAACATACAACCCTGTAGT[C/T]GCCAGCATCATGTGTTAACCCACTGAGTTGTTGGA
Affx-1205093593	CM037938.1	1	34787130	A/G	T/C	R	ATGGTGAATTCAGTTATACCCACGTTTTCAGTCTC[A/G]ATTTGCTTTTATCACATGTAGTGATTTTCATTATA
Affx-1205093590	CM037938.1	1	34792980	A/G	C/T	R	GTGTGTAGTTCTCATCTAATATAGTTCTCATCTAT[A/G]TTATTCGTAGTCGTCTGTTTACCACCACAGAACGA
Affx-1205093586	CM037938.1	1	34800607	C/G	C/G	R	CTTTACCCTATACGATTGATGCCTGTGATATTACA[C/G]CGAATTCTGCAAAAGTAAATGTACGCTCAAATCAA
Affx-1205093583	CM037938.1	1	34978612	T/G	A/C	R	ACTGGTGGCAGTGGATTAGGTTGCACAAACTTTTT[G/T]GGGGGAGGGTGACATCCCGACATTAAACGGGGGTG
Affx-87975747	CM037938.1	1	35012972	T/G	A/C	R	CAAATGAGGACGCTTGCTGATGGAGTTTTATTTTC[G/T]GATGAAGAGGGATTCTAATATTGAATCTATTTGTG
Affx-1205093581	CM037938.1	1	35041383	T/C	G/A	R	TTACTAGGCTGTGCAGTAGATTGATGTTTTTCTTC[C/T]CATAACAGTCAAAATGTTGGCACAACGACTTCTGC
Affx-1205093579	CM037938.1	1	35071777	A/G	C/T	R	AGAAACAGTGGGGACCTTACCCTCTGGTATTCAAC[A/G]GCTTCTTGGGTCTCATCCATAATTCTCTCCACATC
Affx-1205093870	CM037938.1	1	35349347	A/G	G/A	F	TAATCTGCTTTTCCTAACAGCCTATTAACCCTATT[A/G]CCTACTTAGGAGGTGCATTAATTATGTTCAGATTA
Affx-1205093872	CM037938.1	1	35373082	T/C	T/C	F	CTGCCCCCTAGTCTATAAGCCCTATAGGTAGAGTA[C/T]GGTTCAGTCCTTCCAGGAGTCCACTGGGCCTCTGG
Affx-1205093874	CM037938.1	1	35453973	A/T	A/T	F	TCTTTTGCTCAAAATAGGTGCAAGGTCCCGTGACA[A/T]ACCACTGGCCACTTTATATTCCTCTATGTTTTGTA
Affx-1205093875	CM037938.1	1	35460656	T/C	T/C	F	TGCGCCTCCCTATGGGACTCCTGGTCACGGCTAGG[C/T]GTCGAATCCCTGGCTGTAGTGCCACTGTAACACTG
Affx-1205093878	CM037938.1	1	35868632	A/T	A/T	F	ACCACAAGATATAAGTCATAGGTCATACTTTTATT[A/T]AGCACAGACATAAATACTTCTTTTGTAATGGACAG
Affx-1205093879	CM037938.1	1	35889497	T/C	T/C	F	GAAACGTCAAGCAAGAGAAAGGTTGTATGTTTAAG[C/T]GCTGTGCACAGGCACACGTGTTTGTGTAAGATCCA
Affx-1205093882	CM037938.1	1	36311210	A/G	G/A	F	CATTCCTAGTGTAACGTTAAAGGTCTGAGAACGCT[A/G]ATCACAGAGAAACGCCTCTGTGTGGCTGTGTTACG
Affx-1205093884	CM037938.1	1	36336218	T/C	C/T	F	GAGTACTCCTGTAAAACACACACACACAGCTTCGT[C/T]CACTATTTTGTACCTTGTTGGCACTTAATGATGAA
Affx-1205096938	CM037938.1	1	36395779	A/C	T/G	R	ATTAATCTTATGCAACACAAAGATAAATAATACAT[A/C]TTTTTTAACTAATCCAATGTTGGTTCGATTTTTTG
Affx-1205096933	CM037938.1	1	36409472	A/G	T/C	R	AACAAGAGAGACTCAGGATTTAGGAGTAAGGCTAT[A/G]TTATCGTTGGATAAGTCAGCTACTCTTTCAGCTAC
Affx-1205096931	CM037938.1	1	36435368	A/C	G/T	R	ATAACATCTGCTAAATAGGTGTATGTGACCAATAC[A/C]ATTTGATTTGCGTGCATGTTCCGAATGCAGTCTGT
Affx-1205096929	CM037938.1	1	36440931	C/G	G/C	R	TTAATGAGTGACTTAAGTCTTCAGTGTGAGGTGAG[C/G]TGTGACCCTGAGCCATGTTTGTCAACTGGGCTGAG
Affx-1205096927	CM037938.1	1	36452469	A/G	C/T	R	TTGATTGGTTAGTTAAATAAGCATTAGTCTAAAGT[A/G]CACTGTTTGGGTGACATTTACTCTGTCATCAAGGC
Affx-1205096926	CM037938.1	1	36485736	A/G	C/T	R	CACTTCCATTCATTCTCATAAAAAAACATCTACTG[A/G]CACAAAGTTGAGTAGGAAACCATGTGGATCCATGC
Affx-1205096925	CM037938.1	1	36563204	A/C	T/G	R	AATCTCTGCAGACACAACGACCGTTTTATTGGACA[A/C]AAATCTATCACATGCTGGCTTGAGATATTGCCTGA
Affx-1205096922	CM037938.1	1	36583692	T/G	A/C	R	CAACATCAGAGACACAGCAGTTGGAACCAAAAATC[G/T]CAAATTTGGACCCCACCGGTCAAATGTCCATTGCT
Affx-1205096920	CM037938.1	1	36616616	T/C	G/A	R	GAACTGGACACCAAATTCGAAGAGCACCATTCGAA[C/T]GGTCGCGTAGCAGGGCCAGAGTATTGTAGACCTTG
Affx-1205096916	CM037938.1	1	36639636	A/G	C/T	R	CACACACACACACACACAGGAAAGGAAAAGGCCCA[A/G]AGAAAAGACAAACCTGGGCAATCTTCACTGAGTTT
Affx-1205096914	CM037938.1	1	36666550	A/C	T/G	R	AGGACATTAAACGGTAGAAATTAGATGTATGCCTA[A/C]AGTATGTTAGGATGATGATTCGCTACTCGGGGTGA
Affx-1205096912	CM037938.1	1	36680227	T/G	C/A	R	CCAAAGCCATTAACAGTCTCTGTTGCTATGGAAAA[G/T]AGGTTGAGAGAAGGAGAGCTGTAAATGATCAACGT
Affx-1205096911	CM037938.1	1	36688796	T/C	G/A	R	TACTACTGACAGACAGGAGGTGTCTGACTGACACA[C/T]ACACAAGGTGTCTGACAGGTGAGGAGAGCGATCCA
Affx-88047031	CM037938.1	1	36728600	A/T	A/T	F	GCGTCTATTTCCTTAATGCCAACAGCTTTTGCTCA[A/T]TTGCATAGTTATGTGTTTAATGTGCAGTTTTATCA
Affx-1205096910	CM037938.1	1	36738438	T/C	G/A	R	ATTGGCATGCTTGTGGACGCAACCGTGAATTAGGT[C/T]GGATTGCGTCCTACCTGACAGGTCGCTCCTACCAG
Affx-1205096909	CM037938.1	1	36868043	T/C	G/A	R	GAATTGTGAGGGATTGGCCTAGTATACACTTTACA[C/T]GTTGGGCCATGACCAATTGAAGTGTTTTTGGATTA
Affx-1205096905	CM037938.1	1	37039162	T/C	G/A	R	TTTGTACTTTTTACTTTCCTGCCAGGTGAAAATAT[C/T]GTTTTGCCATGCATTGACAATGATGGAAACAGTAG
Affx-1205096902	CM037938.1	1	37391168	T/G	A/C	R	ATAAAAATTAGAGGAACTTTTTAACAGTGTAGTAC[G/T]TCATGGCATAAAGGCATTCATGTTGGAGGGGGAAA
Affx-1205096899	CM037938.1	1	37398926	A/C	G/T	R	ATGTGCTTTTGGCACAAACTGTAAAATAAAAAATC[A/C]TGTAATTTTATAGTAAGTTACCAGTTACGGAGTTG
Affx-1205096897	CM037938.1	1	37405799	T/C	G/A	R	GCTTGTTTACTGCACCATCAGGTTTATACAAATAG[C/T]CTGATCGCCCCAAATCTGTTTGTACACAAACAGTT
Affx-1205096894	CM037938.1	1	37414073	C/G	C/G	R	GAGAATAGGGCCTTGACAGTCCAACTCTTCAATAA[C/G]TATACCAGGTCCTTGTTGTATAAGAACATTTGGTC
Affx-1205096892	CM037938.1	1	37423709	A/G	C/T	R	CAACATTGACAATACAGTAGGTCTACATCTACTGT[A/G]CATGTGTTGTAGTACACTTAGTTAACCCAGGGGAT
Affx-1205096889	CM037938.1	1	37451639	T/G	A/C	R	TTCACTGCTTTAAAATAGAAATCAATCTACTAAAT[G/T]AATGTGTGCCTGAGTCCTTGTCCCAAATGACAACC
Affx-1205096887	CM037938.1	1	37458638	A/G	C/T	R	AAATCATATAGTTCTTGACATCATTGAGAGTCATG[A/G]TATCTGTAAATTGTCTGCCAGTCAATGAGTGTACA
Affx-517056846	CM037938.1	1	37600404	T/G	T/G	F	ATAACAACAGTGATGTGATATTGTTGACTAGTTTT[G/T]ACCATTTAGCTGTGGATAAGTGTATAATACCAAAC
Affx-1205096883	CM037938.1	1	37616748	A/T	A/T	R	GATTTTTAAATTATGAGCACAGCAATCATTTACAT[A/T]TTAGTCATTTAGCAGACGCTCTTTTCAGAGTGACT
Affx-1205096881	CM037938.1	1	37639041	T/C	G/A	R	TTCTTTGTCCTGAAGGAGCTTGGCTCGGCGCTGAT[C/T]GACCGAGACAGAGCTATCTGTGAGAAGAATGAGCT
Affx-1205096873	CM037938.1	1	37765053	T/C	A/G	R	GTGCGTTAACGCGTACATCAACCTGTGCAATTACT[C/T]TGTATCCAAAATGGCACCCTATTCCCTATATAGCC
Affx-1205096871	CM037938.1	1	37772734	A/G	C/T	R	CATTAATGTTTTCTCATTTGTTCTGACTGACTGTG[A/G]TGTTTTGATTCCAGGAGCTGTTGGAGAAACTGAAG
Affx-1205096870	CM037938.1	1	37797915	A/C	G/T	R	CTATTGAAGTGCTTGGGTGTGCCGCCTAAGCATTT[A/C]TTTCTGGGTCGCCTAAGTCCAAACAGTATAATAAA
Affx-1205096869	CM037938.1	1	37809052	T/G	C/A	R	ATTTGAATGAAACCTTCCATAATTATTTGTTTATT[G/T]GGATCCCAATTAGCTTTTGCAGAAGTAGCAGCTAG
Affx-517056852	CM037938.1	1	37823401	A/G	A/G	F	CTATGCCCATAAACATGTTTGGTGGACGCGTGCAC[A/G]TATAGGAGGTCCCTTACCAGGCAGAGGGGAATTTT
Affx-1205096868	CM037938.1	1	37898923	A/G	T/C	R	TTTTCCTGTTCAATTATTTATCATCCGTGCATGAT[A/G]GGGAGAAGAACCAATCTAGGATTAGGCCAAAATGC
Affx-1205096866	CM037938.1	1	37911155	T/C	G/A	R	GGAGGGACTTGTGCACATAACAAAATAGATGGCAT[C/T]ATGGGAATGGACAATTATGTGAATATGTTGAAGCA
Affx-1205096862	CM037938.1	1	37943230	A/C	T/G	R	CAATATTGGATTCATATTTAATATACATCTCCCCC[A/C]AAAAATACTAAATTAAATTGTAAAATCCATATAAC
Affx-517056364	CM037938.1	1	38222887	T/G	T/G	F	AGTCTAGCCATAGTGTAGGGTTTTTTATTTGATTT[G/T]TATTTATTTATTTAACCTTTATTTAACTAGGCAAG
Affx-1205096857	CM037938.1	1	38240324	T/C	A/G	R	TTTTATTGTCATGCCAGACACTCAAGATTGCAAAA[C/T]GCTGCCAATAGAGTATAGATCAATAGGTCAAACAA
Affx-1205096854	CM037938.1	1	38302248	T/C	G/A	R	TTGTACAGTAGTTTATGCAGTAGTTTAGTAGTTTA[C/T]AGTCATTTATTGCAATGGTTTATATCCGTCTCGTT
Affx-88121966	CM037938.1	1	38325940	A/C	T/G	R	ATGTACTGGCTCTAATTTAAATGACCTAAACTTGT[A/C]ATTTGCTCTACCACAGGAACAGAACCATAGTTTGC
Affx-1205096853	CM037938.1	1	38325966	A/C	G/T	R	TGTGATGTACTGTAAAGGCTGGGTTGATGTACTGG[A/C]TCTAATTTAAATGACCTAAACTTGTAATTTGCTCT
Affx-1205096852	CM037938.1	1	38333760	C/G	G/C	R	TCTATCTGGTATTATTTAGAACCATTGTTTTATTG[C/G]TGTGTAAATGCTGCAGTCCTTGGTCACCAGTACGG
Affx-88123072	CM037938.1	1	38342610	T/C	G/A	R	AATGCAGAGGGACCAGTAAACAGGGCATTTGCATA[C/T]GGGAGATTGTTTCATTACAGTGTGCCTCCCAACAA
Affx-1205096851	CM037938.1	1	38351120	A/G	C/T	R	CTTCGACTCTCACATGGAGACTGTTTTGTTCCCTC[A/G]CTCTTTTCCTCCCTCTTCCCTCATGTTGCCTTTCT
Affx-88122466	CM037938.1	1	38351583	A/G	T/C	R	TCCAGGAAGCATCCACAACAAAGCAAAGCTGTCTC[A/G]CCGAGTCTCACGGAGACGATAGATAAACAAACGCA
Affx-1205096850	CM037938.1	1	38409810	A/C	G/T	R	ATGTTCATCAGCATATAGTATGTCTCATATATGTT[A/C]TTTTTGTAGATATTTAAGCAATAAGGCCCAAGGTG
Affx-1205096849	CM037938.1	1	38415979	T/C	A/G	R	CCCTGTACCCCAGCACTCGCCGATGTAAATGTCCT[C/T]ACAAGCCCATGCCCATTGCTCCCCGGCCCCACCAC
Affx-1205096848	CM037938.1	1	38426823	A/G	C/T	R	TTTAAAACCAATTTGTAAAAAAGCACTTTTAACTT[A/G]AGGTCAAGTTTCTGTTCATCTATTCAAACTTGTAG
Affx-1205096845	CM037938.1	1	38530708	C/G	C/G	R	ATACCATTAGTGGAAACACAAGGTACAGTAAAGAA[C/G]TACCATTCAGTGCATGGCTCAGTGAGTTCAATCAA
Affx-1205096844	CM037938.1	1	38566828	T/G	C/A	R	CCCTAAATGTCTTCTCTGCTCAAAGGTGATTTTTT[G/T]GGGGGGAGAAAAAACTCAGCAGTTAGAAAGAGAGA
Affx-88080834	CM037938.1	1	38629397	A/T	T/A	R	AGTGACCCAACGCCTGCAATCCAACAGTTGGGTCA[A/T]CCTAACGGCCCCCCTTACTGAAAAAACTGGCTTCT
Affx-88050472	CM037938.1	1	38677732	A/G	G/A	F	CCCTCGTGTGATGCAGAGGGAGGAGGCTGGTAGCT[A/G]GATCATGACAGGCGCCTACCAGCGACTTGGGAAAT
Affx-1205096842	CM037938.1	1	38717454	T/C	G/A	R	TGGGACAGACGTCGAATATCACCTTGGATTTGGAG[C/T]GACTTGTCTGCCTGTCTGTGCATGTCTGTGAGTGT
Affx-1205096840	CM037938.1	1	38729947	T/G	A/C	R	CAACATTAGTGTAATAATATACTCCATCTTCGATT[G/T]GTCTGAAGGAAACAAAGATGGCTGTAGCTCAAAAA
Affx-87998423	CM037938.1	1	38733503	T/G	C/A	R	AGGTAAAAGGTCAAAATCAGTTTAGAGTCCTACAG[G/T]TACCGAAGGGCAGGCAGGAAAGTAGTCCAGAGTCA
Affx-1205096839	CM037938.1	1	38776501	A/C	G/T	R	CAAGGTGACAAGGATGCACATGAAGTGAAGATATG[A/C]ATGTGCTGCAATGACACAACCAGCTCTGAATGGAA
Affx-1205178538	CM037938.1	1	38816898	A/G	T/C	R	TGACTTGACCCTGATGAGAGATACAGTAAGTCACT[A/G]CAGGAGTTGAAATGATACAATGGTTTGTATGGTCT
Affx-1205096838	CM037938.1	1	38904953	C/G	G/C	R	ATCAATCATGTTCCAAACGGAATCTTTTCCAAATT[C/G]TAATATCGCTTAGCAAGGACAAGGAGGAAATTGCA
Affx-1205096836	CM037938.1	1	38974572	A/C	T/G	R	GTTGGCTTGATTGAACATATGTGACGCTAGGACTT[A/C]TTTGAAAGGAAAATAATGACTGAAAGAGAAGGAAT
Affx-87882113	CM037938.1	1	39022394	T/C	A/G	R	TTATGCATGTTAGCACAACCGTGGCTCTGGCTGCC[C/T]GTGGGTTATAATCCTAAATATGGTGCTTCTCTGAG
Affx-1205096832	CM037938.1	1	39210747	A/G	C/T	R	GTCGACCCAGTCAAAACCCACTCCACACCGTACTT[A/G]GCAGAATCAAGTGGTTTAATAAACTCAGCTATGCT
Affx-1205096829	CM037938.1	1	39218877	A/G	T/C	R	CTATTAAACCGATTATATAACCGGCTCAACCAGAT[A/G]ATTCTGGTGCTATCATCTAACCAAACCGCGCTTCC
Affx-1205096828	CM037938.1	1	39226425	T/G	C/A	R	ATGTATCTGTAGATCAGGGGGATTTATTTTGCTTT[G/T]CCTGAATTAGCCTGGGAGAAAAGCCTGTGCTGCTT
Affx-88061985	CM037938.1	1	39334295	T/G	C/A	R	GAAGATATTGTGTGTTTTGTAGGTTTATAACAGGG[G/T]TATTAAAATATTACCCTACAATGTCCAAAGTACAC
Affx-1205096827	CM037938.1	1	39360323	A/T	T/A	R	CTGTTTGGTTGTCTTCAAGATCCCACAGGTAGCTC[A/T]GTTGGTAGCTCATGGGTTGTGTTTTCCATTCCCGG
Affx-87851515	CM037938.1	1	39366281	A/G	C/T	R	AAGGCTTTATCTTTTGATCAATTATTGCTATTTGG[A/G]TAATGTCATTGTCAAGCTAGTGCCAATATAATCGT
Affx-87851513	CM037938.1	1	39389056	T/C	G/A	R	CAGTCGCTCCTATCGCACATCTACTTCCTTGTCTC[C/T]GACAGCCAATCGCTTGGCCGTGATTCCAACAACGT
Affx-517021348	CM037938.1	1	39495491	T/C	T/C	F	TGACCAGCTGGACTGGGGACAATGCGCTGTGCTTG[C/T]AACACGGCTATCCTCACCATAAGGCGTTAGTTCTC
Affx-1205096824	CM037938.1	1	39506173	T/C	A/G	R	TTCTACACATTTCTATATCGAGCCGAGATACATTT[C/T]TACAGTTTTAAAGCAAATTTCCTGCAATTCGCCAA
Affx-93284050	CM037938.1	1	39522122	T/C	T/C	F	GGTGTGGTTTCACTCTAATGGAGGAGCTTTAACTT[C/T]TAACATCGACTTTATAGGATTAATGCAATGTAATG
Affx-1205179646	CM037938.1	1	39604348	T/C	G/A	R	ACGTAAACAGATTTGCCTTAAACGCTTGACTGATA[C/T]GCTTACAGTACAGTATTTCTAAAGGTATTTCCATA
Affx-1205179645	CM037938.1	1	39604359	T/C	G/A	R	GTCCATACAAAACGTAAACAGATTTGCCTTAAACG[C/T]TTGACTGATATGCTTACAGTACAGTATTTCTAAAG
Affx-1205096818	CM037938.1	1	39605278	A/G	T/C	R	TAACAGTTGACGGATATACAGGAGCTCATTGCTTG[A/G]GAAAAAAAATACTTCAATGATTCTTAATTCAGTAG
Affx-93327372	CM037938.1	1	39619855	A/G	G/A	F	TATCTAGATAGGGAGCAAAACACAGTGCCACGTCA[A/G]CCCTGGTGTTTTCTGTCATTTGTCTCAGTGTTTAT
Affx-1205096815	CM037938.1	1	39625312	A/C	G/T	R	CAATGCATTATGGCTATTAAACCCTAATTAAAAAC[A/C]CTGTATTGTTCTTCAAAGAACATTTCAGATTGAAA
Affx-1205096814	CM037938.1	1	39693186	T/G	A/C	R	AGTCCACAATGAAACTGACATTAAATGTGGAGAAT[G/T]ATATATTTGCGATAGAGCTTTGACCATGATTACAA
Affx-1205179644	CM037938.1	1	39695772	A/C	T/G	R	CTAAATTACTCCAGTTTCCTAACACATTTTCTGTT[A/C]ATTTGCTATTTACATATTACATCATCAGGTAATTC
Affx-1205096813	CM037938.1	1	39706607	T/C	A/G	R	GATCCCACACTCTGTAACAACTAGCAAGGCAGCTG[C/T]TGAAGGCCTATTCTCTCCTCTTGGTTTGTATTTAT
Affx-88122834	CM037938.1	1	39739276	T/G	T/G	F	ATTACACTGGCATCCAAGACATCCTTCATGCAAAT[G/T]ACATCCTATCTGATACATACTGCACATACGTCATC
Affx-99006977	CM037938.1	1	39740175	T/C	G/A	R	GATACAAAGAGGAGTCCTAGGGACTGGACAAGAGG[C/T]TTTTGCCATGTTGCTTTTACCCATCCTCTGTTTTC
Affx-1205096810	CM037938.1	1	39804035	A/T	T/A	R	TTGAACAATTTAAGAAATGCCACCACATTCCTGAC[A/T]TTCTAGGTTCTCATCCAGTTAGGATACAGAACCAG
Affx-1205096811	CM037938.1	1	39810935	A/C	A/C	F	CTAACATTATTGCAATCATTTTACATGACAGTATT[A/C]ATTTATCATGTTTTTTTCCCAGTATAACATATTTA
Affx-1205096809	CM037938.1	1	39814354	T/G	A/C	R	ACTACTCACCCAACAGACAGGGCAGGTGTGGATCA[G/T]TGCTGCCTTGGCTGCAGTCTTCTGGTCTGCAACTG
Affx-1205096807	CM037938.1	1	39867981	A/G	C/T	R	TTGGAAGGAGATGTTCAATGAGCAGGTGTCCACGT[A/G]CTTTTGGTTACGTGGTGTAGCTACTCTGTCTAGCT
Affx-1205096806	CM037938.1	1	39873012	A/G	C/T	R	GTTGTCCTGTACCAGGCGGGTGTTGCTCTGCTCCA[A/G]CTCTCTGGAAGACTGGTCAAGCTGCTCGTAGACCT
Affx-1205096804	CM037938.1	1	39940673	T/C	G/A	R	TTATTTTATGTGTGACCTTGTTTGGCCTCTCCATG[C/T]CAACATGTTCACCTGCCCCCTCCCTGATCAAATCA
Affx-1205096801	CM037938.1	1	39985381	A/G	C/T	R	TATATAACCAGACCATAATCATTGATCCAAAAGCA[A/G]ATAATAAACGAGCGTTTCTATTGGAGACGACGCAG
Affx-88059199	CM037938.1	1	39996347	T/G	T/G	F	TGCTTTGTTCTAGTGGCATTCCTTGCTGCAGTCCA[G/T]GGGTAGAAAACACACTCTCATGAAAACAAACAGAA
Affx-1205096798	CM037938.1	1	40171998	T/C	A/G	R	TACTCTGTGAAGTGCGCGTGTGCAATAACTCAATT[C/T]GCTTTTGCACTTCTAAACAGTGCCATTTTTTAAAA
Affx-98987358	CM037938.1	1	40172397	A/C	T/G	R	TTACCATGATATGACTGGGTTGCCACTAGAGGGAG[A/C]GAAGGAAAGGAAAAGAGAAACAGCTAAAGTGGTGA
Affx-1205096795	CM037938.1	1	40178517	A/G	T/C	R	ATAGTATGGACCACAGCTACTCTCCCTCCCCATGT[A/G]AACCACAATCCCGACACTCTGTTTACTCCCGACAC
Affx-1205096794	CM037938.1	1	40187430	A/C	G/T	R	GAGTCCATCATTACTTTAAGACATGAAGGTCAGTC[A/C]ATAAGGAACATTTGAATAACTTTGAACGTTTGCAA
Affx-1205096793	CM037938.1	1	40213664	A/G	T/C	R	TGGTAATATTTTGTGAATGTCTCCCTTCCATTTCT[A/G]TGTTTTCTGTGGTATTCTGTCTTCTGCAGTAGGTA
Affx-1205096792	CM037938.1	1	40220941	T/C	G/A	R	TCGGCAGCGGGCATGAGGAAGAGCTGGCACGAGGA[C/T]ATCACCCAGGACCTGAGGAACCACTTGGTGCACAA
Affx-1205096790	CM037938.1	1	40226296	A/G	C/T	R	TCGCTCACCAGTAAATTGACTTGCCTAGCCAAGTA[A/G]CTAGCTACTTTGCTAACTAGTTAGCTATTTGTAGG
Affx-1205096789	CM037938.1	1	40339817	C/G	G/C	R	TATACAGTATAAAGTCTATAAACATCTAGCCTCAT[C/G]TAACACACAGAAAGATATTCTCTCTCACCTGAAGT
Affx-87988935	CM037938.1	1	40344585	A/G	C/T	R	AACACATCTAATAGTAATGGGGCGAGTTGATCTGC[A/G]AATTATTTTGAATAATCGATTGGGAAGCCATCAGG
Affx-1205096787	CM037938.1	1	40345829	A/C	T/G	R	AACAAAAGCAGCATACATATACAAATTAAATAAAA[A/C]GTACAATTGGAAATAATAAATATACGCACATATGT
Affx-1205096784	CM037938.1	1	40393000	C/G	C/G	R	TGGACTGGGCTCTGTGACTGAGGGAGAGCGACAGA[C/G]ACATGACATTATCCATCTTATTCTAAATCTCCTTC
Affx-98669296	CM037938.1	1	40398904	A/G	T/C	R	TGTGTTTGCATTCAGACTGATGTCACAGGCGGTAG[A/G]TACTGTAGCTGGTCTCTGGTGTAGTGGGGTCTCTT
Affx-1205096783	CM037938.1	1	40403155	A/G	C/T	R	AATTCACTTCCAACCAGGGAGGAAAAAAAGGATAA[A/G]ATAAAGACAGAGTTAACACAAATAGAGGCCTTGTT
Affx-1205096782	CM037938.1	1	40426302	T/G	C/A	R	CTGTCCCGCCCCCTTAGCGCCTTGTTTTTCCATTG[G/T]TTTTTTTCCCCAAGCCTGGCTGATCTAGCCAATTA
Affx-517056404	CM037938.1	1	40442631	A/C	C/A	F	ATAGTGCATACGTTTCATCAGTGAGAAAGAATTAC[A/C]AAAAAAAATAAACTGCTACTGCTAAGTGTTGCACA
Affx-1205096780	CM037938.1	1	40485720	A/G	T/C	R	AGACGTTTCTGAAGTGGTTGATGTTGACTACCTCC[A/G]TGGGGTTGAGCTCAGACTCAGGCTTGTTCCAGAGC
Affx-1205096775	CM037938.1	1	40544902	T/G	C/A	R	TTTTTGGGCGTCCGAGAGGAATTTCATCAACTCAC[G/T]GTGTGCAGATTGAAGACAGAAACAGACTTGCAAGG
Affx-1205096774	CM037938.1	1	40563242	A/G	T/C	R	ACGGTCCTTCACTCTCCTGTCTAGTGATTTGATCT[A/G]AACGAACTGTGCCTTGAGTATGTCGTCAGAATCAA
Affx-1205096773	CM037938.1	1	40575462	A/C	G/T	R	ACCCGTTCTCTCCATGTATTCTACTGAGTCTATCG[A/C]CAAAATTATAAGTAAAGGTACACCTTATTTAAAGG
Affx-1205096772	CM037938.1	1	40601188	A/G	T/C	R	GGTCGGACGAGGGGAAGAAGAGATCCAGGGATTAG[A/G]GGCTAATCCAGGCCACAACCAATCCCCAGAGAAGT
Affx-1205096770	CM037938.1	1	40645329	C/G	G/C	R	ATAATTTTCATATGGGTTGAAGTATGGACAGTGGA[C/G]ACGAATGACGTCATATTTAAACATTTCGGCCATAA
Affx-1205096765	CM037938.1	1	40718216	T/C	G/A	R	AGGAGATGTTTGGGCCCGGGGGGGTCATGGTGGGA[C/T]GGGGACCAGGGGCCACACCCAGGGGGTAGTCCTCT
Affx-1205096763	CM037938.1	1	40724517	A/G	T/C	R	ACCAAGAGAAGAGTTCCTGTAAAGTCCTGAATTGT[A/G]TGTAGTAGAGGATATTGAATGGACCAGGCTAAGTC
Affx-1205096761	CM037938.1	1	40759008	T/G	A/C	R	TGTTGACTAATTGAGGAACACAATCTCCATTTTTA[G/T]ATCTTTCCTATTCTATGACTGTCTGTCATAACCAG
Affx-1205096759	CM037938.1	1	40793951	C/G	C/G	R	ACTGCCTGCAAAGCGAAACAACGTCGGCGCTGCAG[C/G]TCACATGACCAGACACACTGTTGTCATATGACATG
Affx-1205096758	CM037938.1	1	40828748	A/G	C/T	R	CTAAGATAGAACACTCTAAAAAAGTGTGACTAAGT[A/G]GCTCAAATGTTAAGGGCACTTCGCAGCATACTCAA
Affx-1205096757	CM037938.1	1	40834193	A/G	T/C	R	CAGTCCAGTTGATGGCGATAATGCACCGTAAATTT[A/G]GTTGCTAACTGCCATATAAAAAAAATCCACAGAAG
Affx-1205096756	CM037938.1	1	40842267	A/T	A/T	R	GCTTCTCAAATGAATGTCAAAAGTAGAAATATTTT[A/T]AACTCTTTTCCTAACGTAAACTAAATATCCTAACC
Affx-1205096754	CM037938.1	1	41037424	T/C	G/A	R	CCAGGGCCGTTGGAAAGGTTGATTGAAATATAATA[C/T]AAGTTTCTCCTCCCACAGGGTTAAGTGAAAACATA
Affx-1205096753	CM037938.1	1	41043205	T/G	C/A	R	ACCGCAGAGCAGCTTGCTAGCTAGCTAAAAGCTAG[G/T]CTATGCTGAAGATACTGTAGCTAACGACATACCCA
Affx-87974716	CM037938.1	1	41076203	A/T	T/A	R	GATTCAAAGTGTGCTGCAGTACAGTAGAACTACAT[A/T]AAACAGTTTGCTTGCATGTGAAATGTTATGTGTGG
Affx-1205096748	CM037938.1	1	41169184	T/G	A/C	R	AGCTAGCTGCGATAAACCGGTGTAAAAGGTTTAGA[G/T]CTTGCGGTAGGAATCCGGAGATGTGGTAGAGAAAA
Affx-88124081	CM037938.1	1	41339342	C/G	C/G	F	TGGCTGTTGTGTGGTCTAATGGCCCCAAGGTGGTG[C/G]TGTTGGCTCAGTTTTCATAAGACGAGAGGGGAGTG
Affx-1205096743	CM037938.1	1	41353710	T/C	A/G	R	GGTTGCTAGTGTAATCTGTGTCTGTCTTGTCTGTA[C/T]ACTCTCTGCAAAGACGAGCCCACACTCAACCCAAA
Affx-1205096742	CM037938.1	1	41475180	A/T	A/T	R	AAGGGAAATATAGTTTTATTTCTAACAAAGATATC[A/T]AAGTATTTTTCAACATGTTGTGTATCCCTAGAAAT
Affx-1205096741	CM037938.1	1	41494693	A/G	C/T	R	TCCTGTCCCTTGTGGTCTGTATGGGGGCCGTCAAC[A/G]GCAGGACCCGAACCCCACTGGCCCCACTTTGCATT
Affx-1205096739	CM037938.1	1	41545009	A/C	G/T	R	TTGACCACTTTAAAAGGCCTCTTATGCATGCCATT[A/C]ATTCACAGCAGGCACACATGGATGGCATGACAAGC
Affx-1205096737	CM037938.1	1	41585032	A/C	G/T	R	AGTTGACCTCTTTCTAATGCCAAATTCTATCTCAC[A/C]TTCCTTCTTACAGCTCAGCACCACTAAAACGGTGG
Affx-1205096736	CM037938.1	1	41595664	T/C	G/A	R	TCTGACTCTCATTCCCCTGTCTCTCTGACTCTCAT[C/T]CCCCTGTCTTTCTTCAGACAGCCCCGCTGAAGACT
Affx-1205096734	CM037938.1	1	41646692	C/G	C/G	R	CATCACCCCCAGAAACTCTGTCTGTCTCTGGGTCT[C/G]ATTCCCCAACAACACCAACTGGCTCTCCTGGCAGG
Affx-1205096733	CM037938.1	1	41660423	T/C	G/A	R	GCGGTGAAGACTGCAGAGCTTGAGCCTCATCATGA[C/T]GATAAAGATGATTCTAGCCCAGTGGGAATTAGATT
Affx-1205096732	CM037938.1	1	41672326	A/C	G/T	R	ACCCATAGATAGGCTAGAAATGTTCTAACAATTAT[A/C]ATTTTTTAAGCTTGCATTCAATTGTCACTCCCTGT
Affx-1205096731	CM037938.1	1	41714980	T/G	C/A	R	TGTGATTATCGAATTGTGGACTAATGAAATTCTAG[G/T]TATCAGAGATTGTAGTAGTGGTTGTAGCGACTGTA
Affx-1205096730	CM037938.1	1	41728654	C/G	G/C	R	TGGAGGGTTGCTGGGATCTTTTGTACACTACAGTG[C/G]CTCCTCTCCATGATTAGAATGGACTCATTAGTGTG
Affx-1205096729	CM037938.1	1	41770665	T/G	C/A	R	GGGGAAAGGACTTACATTTAAATCTCTGTACTGAC[G/T]TCTGCCTACGTCTGAATCAGGCCCTGATAACAACA
Affx-98987626	CM037938.1	1	41899465	A/G	G/A	F	TCGTGTCCTTCTGGTCATTACCTCTATCCTGACAG[A/G]GCTCCTCTAGAGGACCTTAATGCTGTAGGTGGGAT
Affx-98994951	CM037938.1	1	41899889	T/C	T/C	F	CTAAGTGAACAATGTTACTTTTAAGTTTTCAACCA[C/T]ACAGTAAGTAGAGCAGCAGTAGTAACAACCTGATG
Affx-1205096727	CM037938.1	1	41913262	A/C	T/G	R	ACAATGTCTAATCCAATGTTTGATGGACCAATCTG[A/C]GACATCCACTTGTTGTTGCTGAGTCAACGTTTTGT
Affx-1205096722	CM037938.1	1	42158792	T/G	A/C	R	ATGGGTTTTGAGGAGGTGACGAGGAGTATGCAAAT[G/T]AGATTCTCCCATAGACAGGGAGGCAGGAAGAGGTC
Affx-87924218	CM037938.1	1	42171211	A/G	C/T	R	TCATGGGAGATATGTTTAATGAATTAGCTGTGTTA[A/G]TGGTGTTCTGTCAGAGAACAGGAATACAATCCAGA
Affx-1205096718	CM037938.1	1	42297799	A/G	C/T	R	TAGCCCTGGAAACGCTCAACCTTATTTCTGTCCAT[A/G]TCCATCCTTCCGCCTCATCCATATACTGAGCGTGC
Affx-1205096717	CM037938.1	1	42336174	A/T	A/T	R	CAGAGAGAAAAAGATGTAGATTCACCAGCAGAGTG[A/T]TTATTTCGCCTTCGCAGAAGGCAGGAATCGTGGTC
Affx-1205096714	CM037938.1	1	42418837	T/C	A/G	R	TATTGTTAAGAATTAGTTGTGGTGCATTCTAGAAC[C/T]AGCTGCCACTGGCACCACCTGCCACTAGCACCACC
Affx-1205096712	CM037938.1	1	42427789	T/G	A/C	R	AAAGTAGATCACAGCAGATCACAGTTGATCAAAAC[G/T]AAATACAGTCTGATACATGACTACTAAGAGTGTAT
Affx-98671851	CM037938.1	1	42465792	A/G	A/G	F	AGAAAGCATGGATTCTACTCCGCTTCAGCAAACCA[A/G]CTCCATTGTAGCTAGCTCCATTGTACCCGAGCCAG
Affx-87953276	CM037938.1	1	42490106	A/G	T/C	R	CCACACGGGATGATGGTCACGTCACTCAACGGGAT[A/G]GGTGGGACTTCCTGCCACGGCCCTGTGGTCGTCAG
Affx-1205096706	CM037938.1	1	42514383	T/G	A/C	R	TGAGCTATATTGTATGCTCAAGAAAGGAGGAAAAT[G/T]GTATTATTTTATACTAATACAGTTGCTCAGAGATA
Affx-1205096705	CM037938.1	1	42533283	A/T	A/T	R	GAGTGAGGCTAGAAGCAGTAATCCATACAAAAAAC[A/T]AAAAACTTCACAATTATTTTAATCATAAGTACAGT
Affx-98994193	CM037938.1	1	42593539	A/G	C/T	R	CCGATGAGGACTTATATATGGACTGGATACACCGA[A/G]AATCAGCAATGTTTGAGTTACCTGTCCGTGTATCA
Affx-1205095204	CM037938.1	1	42725306	T/C	C/T	F	TCATTTTCTATGTGCTTAGACTATAAAAGTTAGAT[C/T]GCCTGTTTTATCATTCTACTCCCAATGTGTTTGGA
Affx-1205095206	CM037938.1	1	42756374	A/C	A/C	F	CCAGAGAGCAGCACTTACCTAGCCTGGCCAAGAAA[A/C]ACAACCCCTGTAGCCTCCAGCATCTCCTTAATACT
Affx-87951229	CM037938.1	1	42759299	C/G	G/C	R	ATGACCAAAATGAGAATAACTATTTTTTTTCTCAT[C/G]CTTAAAATAGCCTTTTCAGGCCTCCTACCATGTTG
Affx-1205095208	CM037938.1	1	42782761	A/G	G/A	F	GACGTAATGACGCCACATAAAATTTTGCGCTATAC[A/G]CTATAACACAGAATTCCGAAACTAGCCCACAATGT
Affx-93441224	CM037938.1	1	42787377	T/G	C/A	R	ACGGAGCTCCTAGAAAGTGATGACCGTTATATGAA[G/T]TAGGAATTTTGGCAACACCTCAATTCTACACAATT
Affx-1205095210	CM037938.1	1	42793342	T/C	T/C	F	GTCCTTATGCTTCCAAAACCATCCCACAAGCGATG[C/T]GTGTTAATGTTCAGACCTGAGCGTCACGGCTATTA
Affx-1205095212	CM037938.1	1	42818621	A/C	A/C	F	TCCAAACATATTGTTTTGTCAAGGTGAAATAGATA[A/C]ATGCTTAGACCTACACTCTTAGAAAAAAGGTTTCC
Affx-1205095213	CM037938.1	1	42914555	T/C	C/T	F	CTTATCTCATACATCTTCCCCAGATCCTTATCCAG[C/T]ATCTGACACAATTAATTATTTTAGTTCTGGGTTTC
Affx-1205095215	CM037938.1	1	42928421	T/C	T/C	F	CAAAAAATATATAGGGGTGTGGATCATCATCTCCT[C/T]TGCAAAGAGTTGATCAGGCTGTTGTCCCACTCCTC
Affx-88108593	CM037938.1	1	42933190	A/G	G/A	F	ACAGCACATCATCACCATAACAGTTTACGGAGCTC[A/G]GCTGTGATCACACTACAGCCCATCTAGAAAGAAAG
Affx-88018820	CM037938.1	1	43239985	A/C	A/C	F	GTCCAAAAACACCAGAGACCCTTTTATAAAATCGT[A/C]CAATAAATCTTATATTCCAACAAATTCGTATTCAC
Affx-1205095218	CM037938.1	1	43366532	C/G	G/C	F	CTGTCCTTCCAGGTTCTGAAGATCTTCGTCCATCT[C/G]TGTGGCCATGGATCACCTCACTTTCTGACGGAACT
Affx-93415705	CM037938.1	1	43382849	T/G	A/C	R	TGCCCCATGGCAAAATGTGTTGAATTATAGGAAAT[G/T]AGTTACAGTATAAATTGCCAAATCTTCTCTCCGCC
Affx-1205095224	CM037938.1	1	43443248	T/G	G/T	F	CAATATTAAAGTCCCTTTTTAACCAGGTTAAACAT[G/T]GGTTAATATTAGACTAGAGGAAGGCTACAAATTCA
Affx-1205095226	CM037938.1	1	43459779	A/G	A/G	F	CCAATGCAATAGATCCTGTCTTTAGTAGTAAAGCA[A/G]CATGGCGTGCTTGCTATCTGGCTCCGTCTTTGATA
Affx-1205095227	CM037938.1	1	43586646	T/C	C/T	F	TGTAAAATTTCTTCTGCATTGATCACTGGTGTTTT[C/T]CAGTTCTATTTACTGGCAATTACTATTATAATACT
Affx-1205095228	CM037938.1	1	43599764	T/C	C/T	F	AATAGATACTGTACTTTACTGTCCATTGGTTGGAA[C/T]GTAATTTTGTCTTTTGCCTTTCCCAACATCCCCCA
Affx-1205179336	CM037938.1	1	43693124	T/C	C/T	F	ACGCTACGTTCTTGACTCCGTTAAACAGTCACAAA[C/T]GACTCTCAGGCATTACTTAATGTAACACTGATATC
Affx-1205179337	CM037938.1	1	43693146	A/G	G/A	F	AAACAGTCACAAACGACTCTCAGGCATTACTTAAT[A/G]TAACACTGATATCAGATATTCACCTCTGATGATTT
Affx-1205095230	CM037938.1	1	43701630	C/G	C/G	F	TTATTGGCCAATTATAATGAATGACTTAATCTATA[C/G]TTAAGTTGTTAGCATGTGATGGGGAATAACAGGTG
Affx-93392243	CM037938.1	1	43701867	T/C	A/G	R	TGCTGTAAGATGTCTGTGGAATACGACAAGTTCAT[C/T]GAGTCACAGAGGAAGTGAGTGTTCAGTCACACTTT
Affx-1205095232	CM037938.1	1	43711603	C/G	G/C	F	ATTCTCTGACAGGCTGTTGAAACAACTCACATGCA[C/G]GCACCCACACACACACACGTCTTTCAAAGTTGCTA
Affx-1205095234	CM037938.1	1	43827743	T/G	T/G	F	GAGGGAGGAGGGTCTCCAACAACTGGACAGAGAGA[G/T]TTATCATTAACAGCAGACTTGTACATTTACTCAGT
Affx-1205095236	CM037938.1	1	43834186	T/C	T/C	F	GAAGTAACTGAGGTCTGGACACATCATTCTGGTCA[C/T]ACTGAGGACAAAAAATAAGCATATGAGACATTCAT
Affx-1205179338	CM037938.1	1	43911835	A/C	A/C	F	ATCATTGTAAGTGCGTCCTTGACGGAGGTGATATC[A/C]TGTATCTCCCAGTCTCTGTGCTGTAAGATCCTCTG
Affx-1205095238	CM037938.1	1	43925535	T/G	G/T	F	GGTATTTAACATATTACGGGAGGATGTTTATCAAT[G/T]ATTTTTATATATACACTAAATGACTGACGGGAGCG
Affx-1205095241	CM037938.1	1	43935531	T/C	T/C	F	TTCAGAGAGTTACAGCTGCATCAAGGGTAGGTGCT[C/T]TGCTACAGATTCAATGCTGTGGAATCTGTTTACTT
Affx-1205095245	CM037938.1	1	43949272	A/G	A/G	F	AGGACTGACCTGAAGCTCGGCCAATCACAGGTCAC[A/G]TAGGCTGAGTCAAACCCTCCTAGAACTATAAAATA
Affx-1205095247	CM037938.1	1	43954542	T/C	C/T	F	AAATATTAACGAACAACTTCATTTCCAGGACATTT[C/T]CACAGTGACGGTATTTGTTTATGGACACTCCCCAG
Affx-87929675	CM037938.1	1	43955493	T/C	A/G	R	TATATATATAAAGAAATGTCCAGTTCAACGTGATT[C/T]ATCAGACAAACATCTCAGCTATGACAAAGTCCTTA
Affx-93278220	CM037938.1	1	43964458	T/C	A/G	R	CGGCAAGGCCTGGGCAGAGTAACATGCCAAATCTT[C/T]ACTGGTTCTCAGCAAAGAGTGGAGCAAGAGTTTGA
Affx-1205179339	CM037938.1	1	43965564	A/C	A/C	F	AGCAGTCACCAAAAACGATCCATTTCAAATAGAGC[A/C]GCAATCATTGATTAGCTCTTTTCATGTCAGACTTA
Affx-93362068	CM037938.1	1	43970513	A/C	T/G	R	AATTCTGGTCACACATGCTGGCAGTACTCCTCATA[A/C]GGAAACGTTAAGATTACAGTTAAAGTTGGTTTGTT
Affx-1205095253	CM037938.1	1	44230535	A/G	A/G	F	TTTCTGACAAGAGACCACTTACATATGGTCAAGTT[A/G]ATACATTTTTTAAAAGTTAGGGAATAACATATACT
Affx-1205179340	CM037938.1	1	44236150	T/C	T/C	F	GCAGCATTACTAGGCCGCACCGGAATTGGCCTGTG[C/T]TAACTAGTAGCCTACTCGGCTAGATAATGCTGGCG
Affx-1205095258	CM037938.1	1	44337034	C/G	C/G	F	AAGATATGTATAGTTCCTATATCGCATCCCCTTTA[C/G]CATACACTGTTCTCTTTTCTAGGAATGGGGTCTAT
Affx-1205095259	CM037938.1	1	44393208	A/T	A/T	F	AATTGCACAAGAACAATACATTTATGTATTTTTTT[A/T]ATGAATTGTTTTGTCTTTATTCAAACCGCCCGCCA
Affx-1205095261	CM037938.1	1	44406597	T/C	T/C	F	GACATTATTCTCATTACAAATATTTTCCCTTTTCC[C/T]GATGAGACTTGAGAAATGAATATACAATTACATTG
Affx-1205095266	CM037938.1	1	44691854	T/C	C/T	F	AACTCACTTCAGTACCTGACGTGAATTTGACCTCG[C/T]AAAAGTGTAGCACATTGTTATATCAAGGGAAAGAA
Affx-1205095267	CM037938.1	1	44699506	T/C	C/T	F	CAATAACACTACAATCAAAATAGGATGGCAATGTA[C/T]GCTCTGGATGTCACCTATACACCTGATGGCAGTAT
Affx-1205095270	CM037938.1	1	44731520	T/C	T/C	F	AAAACGGTGGAGCGTGCTTGCACTCTTCGTGATTT[C/T]TGCTGTATGACACTTGTTATTTGCCATATGCCAAG
Affx-1205095271	CM037938.1	1	44736802	T/C	T/C	F	TAGGTTATCAACAAGTTTTGTGTGAGAAATAGTTT[C/T]CCCAGAGAATGTGAGGAATGCTACCCCAAATGCAT
Affx-1205095273	CM037938.1	1	44791902	T/G	G/T	F	GTCGGTAGTTGTGTACTGTTTGTTGGAGACTGTTT[G/T]TTGTTCTATGGAAGATCAGTATATCTTTTGAAACA
Affx-1205095275	CM037938.1	1	44799227	T/G	G/T	F	TTTTCAAACAGCTCTTACACTAAAATGGCAAAATT[G/T]TACAGTATTGTTTAAGAGGAAGGGTGAGGAGGGGT
Affx-517056483	CM037938.1	1	45017013	T/C	C/T	F	AACATCATGGCCACCATCACTTAGAGAAGAAATCA[C/T]GGACACCATCACTTAGAGAAAAAATCATGGACACC
Affx-1205095279	CM037938.1	1	45024251	T/C	T/C	F	GTTTGGCCGGGGGGCTTTACTTTGCTCATCGCGCT[C/T]TAGTGACTCCTTTTGGCCGGCCCTGGTACCCGCAG
Affx-1205095280	CM037938.1	1	45029822	C/G	C/G	F	CATCACTCCTTCCGTCCATTGCTATAACAGTCATA[C/G]CAGATCAATGTAGCACCCTCTACATCGTACTGTCA
Affx-1205095281	CM037938.1	1	45035512	A/T	T/A	F	TAGTCACCTCAACTTGCTCAATTTCCACATTATTC[A/T]TTTCAATATGTATTTGTGGTTTAGGGTTTAGTGAA
Affx-1205095284	CM037938.1	1	45056026	T/G	G/T	F	CCAGCCATTGTAATCAGAGGTGACCTGAAAAAAAA[G/T]AAATTCTGGATGGATTGTCCTCGGGTTTTTGCCTG
Affx-1205095285	CM037938.1	1	45066882	T/C	C/T	F	GGCTGGCTGGCATGCCGTCTCTCCCTTCCCCTAAT[C/T]CCCTGTTGGGAAATTGTTGTAAAAAAAGTTGTTGG
Affx-1205095286	CM037938.1	1	45075107	C/G	C/G	F	ATGCTTTTGTTATTTATTATATGTCCTTTTTTATT[C/G]GTTATCCTCAGAAATCCAAATATATCTCGTGAGAG
Affx-1205095288	CM037938.1	1	45084584	A/C	A/C	F	AGAAATCAAATAAACAAAATATTGTTTTCAAATAA[A/C]TTGCATATATTCAAACAATGTCAATATTAGTTGTT
Affx-1205095292	CM037938.1	1	45100089	A/C	C/A	F	CCTTTGTTCTCTATCTTCCCTCCTTCCTTCCCTCC[A/C]TCCACACAATGGTTGGGGACTCTGATTGAACTCTG
Affx-1205095294	CM037938.1	1	45125636	T/G	T/G	F	GGCACTTAGCACAGTGTGTTTGTTTAGGTGTGAAA[G/T]TATAGGCTCACAAGCAGCTCTAGGATGGCTCAGTA
Affx-1205095295	CM037938.1	1	45131925	T/G	T/G	F	TCTGCAGTCTAGCCAGGCTTTCAACAATGCTAAGT[G/T]GCTTGGTTGGCCCCTCACTGAGGTTGGAAAGGGCC
Affx-1205095298	CM037938.1	1	45227137	T/C	C/T	F	CAGCTAAAATGAAGCCACTTCCGTTCAGAATGTGG[C/T]GCCTGCTTCCACCGTATTCCACCCACCCATTCACT
Affx-1205095300	CM037938.1	1	45388785	A/G	A/G	F	CTCACACGCTTCTCACAGGAGTACAGGTGAGTGCT[A/G]CCACTATATACTGTAATTACCTCCATAGATCCAAA
Affx-1205095305	CM037938.1	1	45406482	C/G	C/G	F	CAAACTATAATATTTCTTATGGAAAGAAGTATGTT[C/G]AATAGGAAACTTAGATTTTATAGATTTTAGCAGGT
Affx-1205095310	CM037938.1	1	45425508	T/C	T/C	F	CCTAGTATTTCCCTCCCTAGTACTCCCAAACACTC[C/T]CTTCCCTAGAACTCTCCTCCCTAGTACTCCCCACC
Affx-1205095313	CM037938.1	1	45614945	T/C	T/C	F	GTGGGATTGAGTTCACAGTGAGACATTTCTCAAGG[C/T]GTGTGAACAATGGGGGAGGGATGGGGGATTTACCA
Affx-1205095314	CM037938.1	1	45627658	T/G	T/G	F	GAGAGAGGCGGGCATGGGCCCAAATGGGAATTGCA[G/T]AACTGCGGCAGTAGAACAGAGTACTGTAGTGGAAG
Affx-98661074	CM037938.1	1	45629564	T/C	A/G	R	GGTCCCAGGTCAATGTGGAATGACATGATGGACTC[C/T]GCATGCTTCATCCCGCCACCCCGAGGATGTGACGG
Affx-1205095315	CM037938.1	1	45729555	T/C	T/C	F	TTGTATTGATCTTTTGGTGGTTTACAGCAACATAG[C/T]GTCTAATTATTTCATCAATACAAACATATTTATCA
Affx-1205095318	CM037938.1	1	45737457	A/C	A/C	F	ACCCATACAACAAAATGTTATACTGTATATTATAT[A/C]ATTTATACAAAATATACAGACATTTTTCACAAAAA
Affx-1205095320	CM037938.1	1	45760877	A/C	A/C	F	AATCAAATCAGAAGAACACTGTACTGTATACAATA[A/C]CCTCCTCCTTCTCATCCCACCATCACATTATCATG
Affx-1205095325	CM037938.1	1	45781350	A/G	A/G	F	CTCCAGCCCTGTGCACCACACCACGAGGGTCTGTT[A/G]TAAACTACTACAAACTAGGAATGTCTGAGGTGTGC
Affx-517056503	CM037938.1	1	45830057	A/G	A/G	F	AAAAACACCCCAGAACACACATCTCCACATGCAAG[A/G]AATGTTATGATCATAAACAGCCCTCTCTAACCCTT
Affx-1205179341	CM037938.1	1	45877668	A/G	A/G	F	TCAAATTAAATACTTAGGCCAACAACCACAAGGAC[A/G]CATAAAGGCAAACAAACTTGCAAGGAATTAAGAAA
Affx-88031197	CM037938.1	1	45918278	T/G	C/A	R	CCATTACCTTCTCTATAGCGTAGGACTTAGTGAGA[G/T]GAGATATCTAACCCCATTGCCTCTCCTCTACCCCC
Affx-1205095326	CM037938.1	1	45990776	A/C	C/A	F	ATGTACACACACAGATACACACACACACCTCATTA[A/C]ACCCCCACCCCCACATCAGCTTGGTAAAGTAAAAT
Affx-93389303	CM037938.1	1	46221684	T/C	C/T	F	CTCAAAGTAGTCTATTAGGTATTCTATTGGTGCCC[C/T]TCTCTCTGTTCTGAATATAGAAGAATCCTTTTGCA
Affx-517056512	CM037938.1	1	46239967	A/G	G/A	F	GTTATCGGCCAGCGTTGATGTCCAAGATGGAGCAA[A/G]ATTTCAGGGTTTCATTATTTCATTTGTATGTCGGA
Affx-1205095330	CM037938.1	1	46253592	T/C	C/T	F	CCTATTTGAATAACGTATTTCAGCCAAAGTGTGCA[C/T]AGTTTAATAAAGCCTACTTGTAAACTATGTCTATC
Affx-1205095331	CM037938.1	1	46264688	T/G	G/T	F	ACACCTGCCGACACCTGCCGACCATGTCAGCGTCC[G/T]GCCCTCCAAAAGGAGTCGCTAGGGTTCGATGAGAC
Affx-1205095333	CM037938.1	1	46282023	A/C	A/C	F	CGCTAAAAACCACTCCGCGTTCACAGGAAAAAAAA[A/C]CTGCCACTCCAAATTCGATCCATTCATTAAAATCA
Affx-1205095334	CM037938.1	1	46291592	T/C	C/T	F	ATACCTGGTATGTGACTGTCTCTCTGAATCTCTTT[C/T]TTTCTGGCATACTGATGTTTTTCGTCCAGCTCCAC
Affx-1205095335	CM037938.1	1	46342505	A/T	A/T	F	GTTTGACATACTTCGAAGTACGGTAATGGAATATT[A/T]TGACATTTATTGTCACTAAATGCGCTCGACCGTCA
Affx-1205095336	CM037938.1	1	46419356	A/G	A/G	F	CCACTGTTCGGTTCTGGATCTATTTGGTTTAGCTG[A/G]ACTCTCACTGTCAGTCCAGGGTTTGAGACCACGCA
Affx-1205095338	CM037938.1	1	46456990	C/G	G/C	F	ATCGTCAAATCCCACTGCTCCAACCCACACAATAT[C/G]ACATTAAAATGAATCAACGACACAACCCAAACAAG
Affx-87932730	CM037938.1	1	46457527	A/G	C/T	R	GGGGGATGGCTGGAGGGTGGTTGGCGAGTAGATAG[A/G]TGTTCACTAGGGGCTCAGTCAGTCAGTCAAAAAAC
Affx-1205095339	CM037938.1	1	46484376	A/C	C/A	F	ACCCAAAAGCACAGTCAAGCTGCAATATAATGGAC[A/C]GCCAGTGCTGACAAACTGCATTATAATGAAACACC
Affx-88097701	CM037938.1	1	46539117	A/C	C/A	F	CATCCAATAGTATATTCCATCCCAGAGTGTTCTCC[A/C]TCCAATACATAGCATACTCCATCCCATGGTATACT
Affx-1205095340	CM037938.1	1	46568128	T/G	T/G	F	CCACACGTATAGTCTCTAGCCCCAAGGTACTGTCC[G/T]GATGCACAAATTCCTTCTTCCAATACTGAATGTTT
Affx-1205095342	CM037938.1	1	46612532	A/G	A/G	F	GCATCAAAATGTTAATATAAAAACTGCTTAGACTT[A/G]CATACTGTATATCCTTACTCCATTCTGCTCTGTAG
Affx-1205095343	CM037938.1	1	46655412	C/G	C/G	F	AGGATTTGGAAACATGTTCACAAACAAACTAAAGT[C/G]TTTAGTCAGGTAGTGTAAAGGCACACAAATGCACG
Affx-1205095345	CM037938.1	1	46863527	T/C	T/C	F	ACTCTAGATCTGTTTGTGCCTCAGAGTAGTCAGTA[C/T]GGACATATACAATAGCATCTCTTTGCTTGATCAGC
Affx-1205095346	CM037938.1	1	46871396	A/G	A/G	F	TAGATATAAAACGTATCGGGGCTCCTCGGCCATTG[A/G]ACATAAACAATAGACAACAAGTTGGAAATCGCAAA
Affx-1205095347	CM037938.1	1	46885912	A/T	T/A	F	AGGTTTAACATAACGATCAAAAAACGACGAAAAAA[A/T]ATATAACATATAATATAAAATCCCAGTGATGGGGC
Affx-1205095348	CM037938.1	1	46893862	T/C	T/C	F	GAAGACAATGTGTTTATTTGTTAGCACCAAAGATT[C/T]GATGGTTGTTAGCTAATTATGACAGGAAAGGATTG
Affx-98671519	CM037938.1	1	46897028	T/G	C/A	R	ATGGAAGGAATAGGACTTCTGATGAAGGCCATTGA[G/T]GAAGGATGAGAGGTCAAGTTGTTAATTGTTAAATA
Affx-88058812	CM037938.1	1	46899114	A/G	G/A	F	AAGTAGAGACAAAGAAAGCCATGAGAAAACTTAAG[A/G]ATGAAGGATCTGATGGGCTTTTTGTGTGAAAAATA
Affx-1205095349	CM037938.1	1	46922225	A/C	A/C	F	AGCAGCTAGAATTTCCCTTGCCCGAGGACATGGAA[A/C]AGCGCGTGAACAGCGATGGCAGGGGCGCGCTAAAC
Affx-87982905	CM037938.1	1	46997829	A/G	G/A	F	AACATAGCTACTAGAACTAACATGTTGGTCAACCC[A/G]CTGCAACCATGCATTACAGTCAGAAAGCAGTTTAG
Affx-1205095357	CM037938.1	1	47053844	A/C	A/C	F	GAGAGAAACACAGACATGGAGGAAAAATCTGTTTG[A/C]TTGCTTTTATTTATGACAGACTTACATGGTTTAGC
Affx-87963376	CM037938.1	1	47055633	A/T	T/A	F	CCTCAGACATGACATTTCATTCATATTTTCATAAA[A/T]TATTAGCCTGAGTCAGGGAATTAAAATAGGCCATT
Affx-1205095361	CM037938.1	1	47175372	A/G	A/G	F	AGGCTGTAACACAACAAAATGTGGAATAAGTCAAT[A/G]GGTGGAGCTATCTGGAACTACTTGGAACTATAGGG
Affx-1205095363	CM037938.1	1	47264329	A/C	C/A	F	ACAGAAAAGAGCTCCAACTTCTTAATCATAGCCTA[A/C]ATTTTTTCCCGCATATTGTATATAGTTGCAGAGAG
Affx-517056529	CM037938.1	1	47523658	T/C	T/C	F	AATGGTGTCAGCCTGAAGCAGAGAGGGCACACACA[C/T]GTCTGATGGTCACCACATAAAGATGGAGCTGACAG
Affx-1205095365	CM037938.1	1	47569610	A/G	A/G	F	GAACTCTACTCCACACCAAGTAGGAGAATGGCACC[A/G]AAGGAGATGGCTGTTTTACGATCCCGTAACCAAAT
Affx-1205095366	CM037938.1	1	47637746	A/T	A/T	F	GCTCTGAGAATGGAAAATATAGGTTATTTAGAGTT[A/T]AAAAAAAAAATAACCTCCTTCAAACTTTAACTGAA
Affx-93451059	CM037938.1	1	47660368	T/C	G/A	R	ACAATGTCTACACTGTATTTCTGATCAATTTGATG[C/T]TATTTTAATGGACTATTTGTCTTGCTTTTCTTTCA
Affx-88122449	CM037938.1	1	47662010	C/G	G/C	R	AGCACTACAAGAGCTGAATTAAGACATGCTGACAG[C/G]AGAGCCAGCCCATTCACCACAACCAACCATCCAAT
Affx-88123321	CM037938.1	1	47662049	T/C	A/G	R	GTCTTATAAAAGCCCCTGTGGTTATTAGTGCAGTA[C/T]ACCAGCACTACAAGAGCTGAATTAAGACATGCTGA
Affx-93417899	CM037938.1	1	47667434	T/C	A/G	R	GAAACAACAGCCTCTCTCTAGTTTATTTATTGAAG[C/T]ACAATGGACTCTGATGTTTCTGTTTTACTTTCGTA
Affx-88122469	CM037938.1	1	47710139	A/G	A/G	F	GTACAATAACAGCACTGGATCTGCATGGAAAGGCT[A/G]CAGGAACTATTATGACCCTGTGCCAACTCCCTCCA
Affx-1205095373	CM037938.1	1	47781436	C/G	C/G	F	GTTGTCATTGTTGCAGCTGCCTTAAGTAATTGCTC[C/G]TCTGGGATAAATAAAGTTGTTTTAATTTAATTAAT
Affx-1205095375	CM037938.1	1	47791388	A/C	A/C	F	ATTAGAAACAGAAAAAGCTCATTTTTAACCTGGTT[A/C]ATTCCAAAGCTGACATATTTTGCATACCGTACCCT
Affx-88042244	CM037938.1	1	47861096	T/C	G/A	R	GCCAACACGGCCAGTGATGAATATTCAGCCCAGGC[C/T]GTATTAGTCCCTGATGATCTCTTGTCTTTCAGCCC
Affx-1205095382	CM037938.1	1	47980272	A/C	C/A	F	TCATAACAGGTTAAACAATTGAATGTCCCTCCTGT[A/C]GACGCCGAGCTGTTTCCACACATTGTGGTCCCACA
Affx-1205095384	CM037938.1	1	48031038	T/C	T/C	F	GAAAAGGGAATTCAAAAAGTATTCAGACCCCATGT[C/T]GAGAGAACACAGCTCATCCTATATAATAACTAGTG
Affx-99009541	CM037938.1	1	48111277	A/G	G/A	F	TTCACAACACAAAATCAAGGTAGCCAAGTCTATTA[A/G]GCTTCTACAAACAAGGGTTTACCAAGTAATCTGAT
Affx-1205095385	CM037938.1	1	48111745	A/G	G/A	F	TTAGGTTCTTCGGGGTGACAGGGGGAGACTTCGAA[A/G]GCAGGTTACAGGGCTCCCCGGTTTCAAAGTGAGCA
Affx-1205095386	CM037938.1	1	48119480	A/G	G/A	F	CCGGCCTCAGCACAATACCCTCTATAGAGAAATGA[A/G]GAGGAAAAAGGACATGCCAGTTTAGATGCAGAGGA
Affx-1205095387	CM037938.1	1	48204221	T/G	G/T	F	AGTTGTGTGTGTGTGATACTAATAGACATGAAAAT[G/T]AACTACATTTGACCTGTAATGGAAAGATTAGTCAG
Affx-99005162	CM037938.1	1	48260359	A/G	G/A	F	AACAAGTTCAACCAGGTGGAGAGTGACAAGCTGAG[A/G]ATGGACCGCGGAGTCCCTGACACCAGACACGACCA
Affx-87880568	CM037938.1	1	48295426	T/G	C/A	R	CTGCCAAGTTCAGCTCTCCTACAGTCCTCTCATTT[G/T]CATGTGATATCCGGAGCCCTGTAACCCAGCAGCGG
Affx-1205095389	CM037938.1	1	48477608	A/G	G/A	F	GCTTTCATATTAATTCGAATTTCCTGTTATTTTTC[A/G]AAGATTTCTCACAAAAACAAGCATCTCTCTGTAAA
Affx-1205095391	CM037938.1	1	48570969	C/G	C/G	F	ACCACTTTCCGGGTGCACTGTTTTTCTCAACATTC[C/G]TAATTTAAGCACTTTGCTTCGCTTTACAATTGAAG
Affx-1205095393	CM037938.1	1	48618314	T/C	T/C	F	AAATGTGTACATGCTTTTCTCCTCAGAGGAAACAG[C/T]TGGCACTGTTTCCGCATGCTAACATTTTAGTGTGT
Affx-1205095398	CM037938.1	1	48760719	T/C	T/C	F	CGCTGTCAGCTGAGTGTATGACATCATCTCTGAGA[C/T]GGAAATGTCCTTATATGGATGTCAACAGGGGCTCT
Affx-1205095400	CM037938.1	1	48790518	T/G	G/T	F	GGAATGGTCCACAATGTCCTCTACCAACTAAAAAA[G/T]AATCCTAAAGCTTATGAATACACTTTTACTTTTAC
Affx-1205095408	CM037938.1	1	48806542	A/C	A/C	F	TTTCGTGATTTACATAAATTCACTGAAAACCCACA[A/C]TAACACAAAGTTATATTTACAGTATTGCACTTTTA
Affx-1205095411	CM037938.1	1	48940662	T/C	C/T	F	AGCTGCCAACAGGGGCTGGTAAAAAGCCCACTGGT[C/T]ATTGTCTGAGCAATCTGAGAGGGGTTGTTTAATTA
Affx-1205095412	CM037938.1	1	48957196	A/G	G/A	F	GTGGCACTTTATAGAGGCACTGTTGATATTTTTAA[A/G]CAGCATATCAAACACGAATGTTTTGAAAACTTTAG
Affx-1205095416	CM037938.1	1	48969817	C/G	C/G	F	TAAAATATAAATATATATCATCCCACACAAAATGA[C/G]ATCTCTATTGGTTGTTGGTGAAGCTCGTGAATAGA
Affx-87987746	CM037938.1	1	49059468	T/C	T/C	F	GCTGCTGTGTTGCCCATGAGGCAATAAAGCTTCCA[C/T]GTAATTAGCTAGGTAGGTACACATAATCAATAGGG
Affx-1205095418	CM037938.1	1	49072978	A/C	A/C	F	TCCGGTCCTGGAGGGACGAAACATTTCTGGGTTTA[A/C]ATTTTTTTATGGTTCTTCAAAGAACCGTTCCATTT
Affx-1205095419	CM037938.1	1	49139346	T/G	T/G	F	TCTATTTATGTTGGTAAACATATGTTGGTAAAACA[G/T]CAATAAGGCCCCTTTGCATCTTCCCTAAGAACAGC
Affx-1205095422	CM037938.1	1	49149954	A/G	A/G	F	CCTTTTTTTCTATATTTAGAACTTAGGTCTGCTTT[A/G]TTTGCCTATGCAGTCTCTCGGGAAACCCAACTACC
Affx-1205095424	CM037938.1	1	49158330	T/G	T/G	F	AAGTTGACAGAACTCTGGGAAGCAATGGAGTGGTG[G/T]GTGGGTGGGTAGACAGAGATATTGGGGACTGACAA
Affx-1205095426	CM037938.1	1	49167511	T/C	T/C	F	CCAGTGACCTCTTATCCCCTTGTAACCATGGAAAC[C/T]AATTAGACTTCAGCCAAGTCGTGCGTAAGTGCATA
Affx-1205095428	CM037938.1	1	49173763	C/G	G/C	F	CATATTTATCCTGAGTCCCAGAAAACATGCCCATA[C/G]GGGGCACAGGGACACGTACCCCCTCAGATTAAAAA
Affx-1205095430	CM037938.1	1	49182607	T/G	G/T	F	ATGTCACTTCAAGCCCAACTAGTTATATCATTGAC[G/T]AAAACGATTACCATTTATTGACTTAAATCGTTGTG
Affx-1205095433	CM037938.1	1	49196581	T/G	T/G	F	CGACATCTTGGTCTACTTCTCTGCTATTCAAATTT[G/T]GAATCGGAACAGAATTATCTTCTACATGACAAACG
Affx-1205095436	CM037938.1	1	49203115	A/T	A/T	F	CCTAAGCTAGTGTTGGCTGGTTAGTTAGCTAAATC[A/T]GTTTTTGTTGTAATTGGGTGATTCTCACAATCTTA
Affx-1205095439	CM037938.1	1	49208965	A/T	A/T	F	TCAGTTCTCTAGTCTTTGGTTCATACAGCTTTCTG[A/T]TTATTGAATCTCCTGTGCAGTTTCCATCCACACAC
Affx-1205095442	CM037938.1	1	49215636	A/T	T/A	F	ACAGTTTTGCCTTGTGTGTTCTGCCTGAAAAGAAG[A/T]GGCTGTGATTTAGCCAAGTTTTTCCCGCATACTGT
Affx-98991985	CM037938.1	1	49222501	A/G	A/G	F	CCATTATGCAAGAACATAGATTTAGGTTCCATTAC[A/G]ATCTTAAATGGGCCTTTTGGAGGCGTCGCAATCAA
Affx-1205095446	CM037938.1	1	49225812	A/C	C/A	F	TTTCAAATTCATCCATGTCTGTTCTAGAGGGGTCA[A/C]ATGTTTTCTGTTTCTCAACTGTCTTTGAGTAGCTT
Affx-1205095447	CM037938.1	1	49260153	T/G	G/T	F	GCATCAGACCTTCCTAATTCTCACTTGAAACATTG[G/T]TTGTGTGATTAATAGGCTAAATTAAACATTCTGTT
Affx-1205095449	CM037938.1	1	49265075	A/G	G/A	F	AGTAAGGGTTATTGGACAAGGCCTCGCTGGGCCCA[A/G]TCAGGCTGGACTTCACAGACAAGTCCAGGACACAG
Affx-1205095452	CM037938.1	1	49270556	T/G	T/G	F	CTTTTGTGAAAGTATTCCACTCTTTCATGTGAATA[G/T]TTCAGGGGGTATTTTTATTCCACAAGGAATTAATT
Affx-87981098	CM037938.1	1	49669581	T/C	C/T	F	ACTAGAAAGACAACACTTACTTTATTGAAATCACT[C/T]TACGAGAACAACCTGCAGGTGGCCTTGTCTGAGAC
Affx-1205095454	CM037938.1	1	49687935	A/C	C/A	F	TCAATTAGATAGGGGGATGAGCTCCCAAAATGGAC[A/C]AATTAACGCAAAACTACACAATAGAGCATGATGCA
Affx-1205095458	CM037938.1	1	49768027	T/G	T/G	F	GCTCTGCCTTAGCATTTTAAAAAGTCAGGAAAAAT[G/T]TATGAGTAAAATTTCCTTTAGGAATGTACCAGAGT
Affx-1205095467	CM037938.1	1	49944817	C/G	C/G	F	CCATGTAGTGTAGTACATAACACGCTAATCTCCAT[C/G]TAGCGTAGTACATACCACTCTCATCACCATTTAGT
Affx-1205095469	CM037938.1	1	49974181	A/T	T/A	F	ACACTTGGCACTCAGGCCAAATAGTAATATTCCAA[A/T]TTTTTTACATTACAGCCTTATTCTAAAATTGATTT
Affx-1205095470	CM037938.1	1	49981211	T/C	C/T	F	ATCATTCGAAAAGGAATTGCAATTTATTTTTACGC[C/T]CACGTGTCGTTGTTGTCTTCTCTGTTGGAATCTGC
Affx-517056570	CM037938.1	1	50014665	T/C	C/T	F	TGGAGGAAAGAACGTCATCTGTTTCATACATTTAG[C/T]TGCCAACATCAGATCAGTTATTCCATGATAACTAG
Affx-1205095471	CM037938.1	1	50020312	A/G	A/G	F	GTAATAAGACAAACATTTAGATTTTCGTTTAACCT[A/G]TCTCTTAGAATGGGGCTAATTTCACAAAATCACCA
Affx-1205095472	CM037938.1	1	50025860	A/C	C/A	F	GTTCCTGGAGAACCAGAACATGATCCCTTAACATT[A/C]CTGCTGTCAATGACACAAGAGGATGTGTTTGCCGT
Affx-1205091805	CM037938.1	1	50387364	A/C	A/C	F	ATCCAATCATGGGGCGACCTTCACCCCTCTCAAAC[A/C]GTGCGTTCTGACAGGAGGATTAATCTGTAAAGAAA
Affx-1205091806	CM037938.1	1	50497123	T/G	T/G	F	GCATGAGTGGACGAGAGTAGATGTGCTTGTTTTGA[G/T]ATCAAAGTGAAAGTTGCATGTAGCCACTTGTGCAC
Affx-1205091807	CM037938.1	1	50618061	A/C	C/A	F	ACCATCGTCTCAAACAGGAAAGCCACACTAGCTCG[A/C]CATCAATCAGTTACCATAACCATGACACGCCAAAA
Affx-1205091809	CM037938.1	1	50742952	A/G	G/A	F	GGTATCTGTACTGATGTACTGGTATCTGTACTCAT[A/G]ACAGGGAGACATAGTGGAGTGGTAATGCGCGTGCA
Affx-1205091810	CM037938.1	1	50758291	T/G	G/T	F	GAACCCGCTCAACCGAGGACAAATAACGAGCGACA[G/T]ATTGGCCGCCAGTTGAAGGCAGTAATCACCTTTTC
Affx-1205091812	CM037938.1	1	50879882	T/G	G/T	F	GTTACTCATGTCTCTGAAGTGATTTTTTTAGGTTT[G/T]TAATAGGGTAGACTACATAATGGGGTAAACTACTC
Affx-1205091813	CM037938.1	1	50906433	A/G	A/G	F	AAATTGGAGGTTGTAGGTAGATGATTAGGACTGGA[A/G]AGAGAGTAGATTGTAAGTAGCTGATTTTGACTGGA
Affx-1205091814	CM037938.1	1	50915060	T/C	T/C	F	GGAGACGCAGTGTGAAGCTGTCGAGGGTAAATAAA[C/T]ATGTCCTTCATCTATTACAGTGCATTTGGAAAGTA
Affx-1205091816	CM037938.1	1	50928568	A/G	A/G	F	ACCTCTCCCTTCCCTCAGCCCTGGAAGCCGAGCCC[A/G]GTGGATGTAAGAAGACACCACACCCTGCAGGCTGC
Affx-1205091817	CM037938.1	1	50943777	T/G	T/G	F	ACCAGGCCAGACATGTTGGGGGGAATGGATGGGAG[G/T]TTGAGTGAATGGGGTGGGAGGTTGGGGGAATTGAT
Affx-1205091818	CM037938.1	1	50949678	C/G	C/G	F	TGGGTCCTTAGGAAAACGAAATAATGGCATTCTTC[C/G]CAGAAGTTTCCGGTGGTAGCAAAACACAGCCAGCC
Affx-1205091820	CM037938.1	1	50962064	C/G	G/C	F	TAATATGAATGGTTACAATGAAGACTCAATGTCGG[C/G]CTTTACCATCTATGCATTGTTCTCTAATACATAAT
Affx-1205091822	CM037938.1	1	50978265	T/C	C/T	F	CTGCATATCTCCCCACTACATATTTCAATATCTCT[C/T]TACTCTACATCATTACACCTGTCGTCTCTACACCT
Affx-1205091824	CM037938.1	1	50995271	A/T	A/T	F	AATAACCGCCCAAGCCTTAACACAGCTGGCTGATT[A/T]GTTAAACGCTAATGTTGTCTAATTTCAGAATTTAG
Affx-1205091826	CM037938.1	1	51059387	C/G	C/G	F	TCACCACCCACAGATCAGATAATATTATTGTCCTA[C/G]TTTATTACCTCAAATGCAGAATATTTTCTTCTGAT
Affx-1205091827	CM037938.1	1	51079842	C/G	G/C	F	TACTTGGTTAATCTCAGCTCAGTAGTGTGAAAAGG[C/G]CATTTTGAGAATTCCCCTCCTATTGTACTCTTCCC
Affx-1205091829	CM037938.1	1	51138109	A/C	C/A	F	GAAAAATAAAACAACAACTAAGTCACGTGGATGTG[A/C]GTCATAAGACACCTGTTCTCAGACTGGCCAGGGAT
Affx-1205091830	CM037938.1	1	51144925	A/G	A/G	F	GCAGTTTAGCCTACAAATTCAGGGACATTTGTAAC[A/G]TAGTAATATGGTGTATTTTGTCATTATGTATCAGC
Affx-1205091834	CM037938.1	1	51173355	A/C	C/A	F	CAATCTTAATCCTGTATTGAGGCTTTGCCTGTTTG[A/C]TGGTTCATCTGTGGGAATAGCGAGATTTCTTACAA
Affx-88008463	CM037938.1	1	51175866	T/C	A/G	R	AAGGATGAATGGAATGCTCTAAAATGTACAAACTC[C/T]GCCTAACCGAGGCACTGTGTCAAGCAAAACAAACT
Affx-1205091836	CM037938.1	1	51195963	A/C	C/A	F	ACTTGAGCCCTTGGATGCGCCTCTGTCCTGACAGC[A/C]TGGTCGACTCGCCTACACTGACAGTTGTGTTGCAC
Affx-1205091838	CM037938.1	1	51292806	A/C	A/C	F	CGTATTTGTATTTATATTGGGGAAGGTATTCCCAA[A/C]CTGGGGTATGCATACCACCAGGGGTACGCGCAATG
Affx-1205091839	CM037938.1	1	51477839	A/G	A/G	F	ACCTCTGACCTTTGTAACTACTTCCCTCTTACCCC[A/G]AAGCCCTCATGTTGTCTCTTTGTCTCTGTCTCTCC
Affx-1205091840	CM037938.1	1	51490444	A/C	C/A	F	TTGTTTCTGAAATGGACTGTGCGTAAAGAGCAATT[A/C]CATTTTTCTCAATTTGACTTTCAATATGTTTCACT
Affx-1205091841	CM037938.1	1	51499813	A/C	A/C	F	ATATCTAGGAGTTTAAGTACCGTCAGCGTTAATGT[A/C]AGGTGATGTACAGAGCAGAATGTCAGTTATGCATT
Affx-1205091843	CM037938.1	1	51529677	A/G	G/A	F	AAGCCTCCTGAGCATCTTTCAACCTGAGGCAAACA[A/G]GACAGCACTCATGAGTATCTTTAAGTTTAGTTGTG
Affx-1205091846	CM037938.1	1	51635578	T/C	C/T	F	ATAAGACAGGAGGCAGCATTGGACGTTCAGATGCA[C/T]AGCATTGAGTAATGTTTTTATGATTTCTCTCTGAA
Affx-98661922	CM037938.1	1	51751659	A/G	T/C	R	CTTAAGGCGGTTTGGATTTAGTTTTTAACATTAGC[A/G]TTGTACTTGGACATATTTCTAGTATCATATTGGGC
Affx-1205091850	CM037938.1	1	51756955	A/G	G/A	F	TACACCTCACACTCATTTACATCTGGGAGGAGAGA[A/G]AGGGGGGGGGAGACACGCACGTCAGTCACATGATC
Affx-1205091853	CM037938.1	1	51782348	C/G	G/C	F	ATAGGTAATTGGGTGCCATTTGGGACACAGTCACA[C/G]ACTCCTTGGATAACAATGACTGAATGGACCAGCTT
Affx-1205091854	CM037938.1	1	51795992	A/C	C/A	F	TCTCCAGACTGAGGTATACTATGGGTCTCCACTAC[A/C]AGCCTGGCTCGGCTCACTATGTCTGAGATCTGGAT
Affx-1205091861	CM037938.1	1	51976737	A/G	G/A	F	GTGAACAGGGGTAGATTCAAACCAAGTACAAAAAC[A/G]ACCAAAACTAGAAAGAATGGCACATGGCCCTACAT
Affx-1205091863	CM037938.1	1	52113803	A/T	T/A	F	TTGCCATTGGTTACCAATGTAGTCTAATTTCGGGC[A/T]TTTTTCCCGTGGACCAAATAAATACATTTTGCTGC
Affx-1205091865	CM037938.1	1	52311597	T/G	G/T	F	GACAGCGAAAGAGAGCACGAAAGAGGATTTTTTTT[G/T]GAAAAAGAGAATGTATTTGACTGAAACCCCGCTGA
Affx-98991105	CM037938.1	1	52488859	A/C	C/A	F	AGCCTGAGGAAGGTGGAGCAGGAGATGGATAGTCT[A/C]ACCTTCAGGAACCAGCAGTTGGCTAAGAGGGTAGA
Affx-1205091868	CM037938.1	1	52501294	T/G	G/T	F	AAGCAGATGTTATAATGGGTGCACCGAGATAGATA[G/T]ATATCTATCTTCAGAAATGTTCGATTGAGTTCAAG
Affx-1205091874	CM037938.1	1	52592237	T/G	G/T	F	TAGCAACACTAACTGTAGGAGAGGTCTCTTAGACA[G/T]AATGCTCACTAGGGGGGATTGTGAGGTTATGTATT
Affx-1205155774	CM037938.1	1	52641324	A/G	G/A	F	GACCATCTGAACTCCGCAATAGCAAACTGGCCAGT[A/G]TGACCTAGGACTAGATTCAATCAGATTGACATAGC
Affx-1205155775	CM037938.1	1	52811509	C/G	C/G	F	AAATAAAGGAAACACCATAATCATGTCTTAATAAC[C/G]TGTTGGGGATACCCCTTCCCGTTCGGATCCCGTTA
Affx-1205155776	CM037938.1	1	52870201	T/G	G/T	F	TATCAATGCTTGACTAAGTGAAAATAAGCATTCAG[G/T]ATTAAGTGTTGCTAGGTAGCCTAGTGGTTAGAGTG
Affx-1205155778	CM037938.1	1	53066475	T/G	T/G	F	CCCATCTACAGATGCAATCCATTAATTTTTAAGGG[G/T]ACAGAATGAAAACCATTTTCATAATAAAAATATAA
Affx-1205155779	CM037938.1	1	53224449	A/G	A/G	F	GGTGAGACAGAATAGAAAATAATGGAGGGACACAA[A/G]TCAAATAAGTCACTGGTGGAAGATAAAATGTAGGT
Affx-1205155780	CM037938.1	1	53229447	A/T	A/T	F	GAAAGGTTGTGATGTGAATTAAATGACCGCCTATT[A/T]TCTTGTTATTATGTCTGTGAATGTCAGCCAGCCAG
Affx-1205155783	CM037938.1	1	53242496	A/T	A/T	F	TACTACTTACAGTATATTGTACCACAGAATGAAGC[A/T]AAATATTGGGCATTATATTCTAAGTGGATTACTAC
Affx-1205155784	CM037938.1	1	53323676	A/T	T/A	F	GTGTAGGGGTGCCTGGAGAAATGGGTATATTTTGC[A/T]AAATGTTCCCAAACGGCCCACCCAGTGAAGGAAAG
Affx-1205155788	CM037938.1	1	53463791	T/G	T/G	F	ATGCAGGTTGTGTGTGAATACAAATTTCAACTGTT[G/T]GATAGTCTAACGCTGCCTAGATTTCAATAGGAAGT
Affx-1205155790	CM037938.1	1	53470645	A/C	C/A	F	CTCTTCCTCCCATGTCCCCCTCTACCTCTCCTCCA[A/C]CTCCAACCTTCCCATCAACCTCTCCACCATCTTCT
Affx-1205155793	CM037938.1	1	53481519	A/C	A/C	F	CTGTGCTCAGTTGGTCCAGGATTAAAAAACTAAAC[A/C]GCCTAAAGGCTCAGATCTGTGCTCAGTTGGTCCAG
Affx-1205155795	CM037938.1	1	53493161	T/G	T/G	F	ATACACCAATAAACAGAGTCTTGATCACTCAGAGA[G/T]GATGTGTACTGACAGATGCATTAAGAAAACACAAA
Affx-1205155798	CM037938.1	1	53505529	C/G	C/G	F	ATGAAAACTGTCTTCAGAACATGTCTAGATGCTGC[C/G]CTAGAGTTTAAAGTAGGGAGGGGGGACATAAAGAA
Affx-1205155800	CM037938.1	1	53515405	A/C	A/C	F	CTAGTGCTAAAGCTATCTGCTCCTGATAGCTAACA[A/C]CAGATCTACTCTTTGTAACTACTGTAGCTAGCTAC
Affx-517056641	CM037938.1	1	53530374	A/C	C/A	F	ACAGATAAAAAAATAAAAAACATAAAATAATGTAT[A/C]TTTTGTCTCTCTGCTTCTTAAGATTCGTTCAATTC
Affx-1205155804	CM037938.1	1	53755621	T/G	G/T	F	TCCTCATATGTCATCTGTCGCTATCGCAAAAAAAT[G/T]TATTGTATGAAATGTATGCATTCACTACTGTAAGT
Affx-1205097259	CM037938.1	1	53837663	T/C	G/A	R	TGTCTCTCACTATAGAACTGTCTCTCACTATGGAA[C/T]TGTCTCTCACTATAGAACTTTTTCCTACCACTGTA
Affx-1205097257	CM037938.1	1	53984589	A/C	G/T	R	CCTCAGTCCGGGGTGTAGCCAGCTCTCTCAGACAG[A/C]CATCCATCTCTACCTTCCGCCCTCCAGATCTTGTT
Affx-517027595	CM037938.1	1	54006375	A/C	C/A	F	ACACTTTATTATTTTATAGAGCCATAGTATTTGTT[A/C]TTTTATAAAGCCATAGTATTTATTCCTTTATAAAG
Affx-1205097253	CM037938.1	1	54140768	A/C	G/T	R	TGGAAGTGCTGCAAACTGTTTAGTTGAGAATTGTT[A/C]GTTACACCATATACAAAATGGCAGCTGTGGGTCTG
Affx-1205097251	CM037938.1	1	54188005	A/T	A/T	R	GCAGAAGGGAGAGATTATAGGATAGAAGAGGAGAG[A/T]GTAGTGGGAGAAAGACAGCAAATATTGCGATGGCT
Affx-1205097248	CM037938.1	1	54226296	T/G	C/A	R	CTACTTTTGACCAGAGCCCATTCGGACGCAACCAT[G/T]GTCTCCAGAACGGCGCAGTGACAGTTAGTATACAG
Affx-1205097244	CM037938.1	1	54264741	A/T	A/T	R	CAATGTCCTTTGCTGTTGTTCTGGGATTGATTTGC[A/T]CTATTCGCACCAATGTGCGTTCATCTCTTGGAGAC
Affx-1205097240	CM037938.1	1	54331551	A/T	T/A	R	ATCTTAGCTGTAAGTAACAAAAAGTTACATGTTCC[A/T]TACTCCTCTCCCTTCCGTCCTCTACTCCTCTCCCT
Affx-1205097238	CM037938.1	1	54347407	T/C	A/G	R	CATCTTTGTCCCTGTGTAAATGTGCATTTCTGGTC[C/T]CCATATCAAGCCTTTGGTCCATGTGTAAACGTGCA
Affx-1205097232	CM037938.1	1	54419518	A/C	G/T	R	GGGACGGAACCAATGATTAATGAAAGAGTGACATC[A/C]CTACCCCTCAGGAACTGATCACACCAGCACAAATG
Affx-1205097231	CM037938.1	1	54431813	T/G	A/C	R	TGAACCAAAAACAGATCTGGCTTATTAATATATAT[G/T]GGCCAAATAATGATGATCCACACTTTTTCGAAAAT
Affx-88103719	CM037938.1	1	54517810	C/G	G/C	F	TGGACCATTCCAACTGTTTGTATTACAGAAATAGT[C/G]TTTCATTATCCAACCTTGAATGTCACAGTACTACA
Affx-1205093075	CM037938.1	1	54522094	A/T	T/A	R	TGGAGTGGTAGTTATGTATAAAATTAGGTATCAGG[A/T]TATATGATTGAGGACCTTATTACTATTACCATGTT
Affx-1205093072	CM037938.1	1	54639586	A/G	C/T	R	GGTTGACAGCCCAAGGCAGTAACTGATACCCGCAA[A/G]CGCTGATGTTAAAGATGTACAAACATTAAATAGAA
Affx-87932231	CM037938.1	1	54642007	A/G	G/A	F	GACCAGAGATAGGGGGGAAACCTGCAGGCATCTTC[A/G]TCAAGCATTCCACTTCCCCACAGACACACAAAGGA
Affx-1205093069	CM037938.1	1	54657770	A/G	C/T	R	AGAGGAAGGAACACACTGGTGCTATGGAAAAGTAG[A/G]GGAGAGGAAGGAACACACTGGAGCTATGGAAAGGT
Affx-1205093065	CM037938.1	1	54672594	A/T	A/T	R	TAGATTTGAGATTTTATCAGTTTCGAAAAATCTGA[A/T]ATGATGTATGTGCTGCAAAGAAATACAATAGGCAG
Affx-1205093063	CM037938.1	1	54682362	A/G	T/C	R	CCGACCTACAGCTTCCACGACCCGGCTACAGCACT[A/G]TTTGATATTAGCCTACATGAGATTTAATAACCTTT
Affx-1205093061	CM037938.1	1	54687552	A/C	T/G	R	TCACATTGAATTAATCTTTTCAATTTTTTTCTACA[A/C]TATTATAACCTTAATATACACTGCTCCAAAAAATA
Affx-1205093060	CM037938.1	1	54694379	T/G	A/C	R	GACTTCAGCAAGTGCATGGTGGGTAATAGAGTTCA[G/T]AAAAATAAGCTCTTGTAGGCCTCCTACACTGGGGT
Affx-93386094	CM037938.1	1	54712199	T/G	A/C	R	GAGGGTGTTTGAGCTCAACGGCTGAGGTTATATTG[G/T]TCTCAGATAAATCTTTTGACACTTATGACACTGAG
Affx-1205093057	CM037938.1	1	54718766	A/G	C/T	R	CAGATACTTTTTTCAGATCAGCAAAAAAACTTTGC[A/G]TTCCATTTATTTGTTAAAGAACACTTAAAGCAAGG
Affx-1205093053	CM037938.1	1	54731392	T/C	A/G	R	AGTAACGTTAACCATGGACACGGATAGTAACGCCG[C/T]GCAAACTATCAATTGCTGTGTCATTAAGACAGACT
Affx-87968019	CM037938.1	1	55093547	A/C	T/G	R	TTGACACATTGGAATGTATTAACCAAAGAACAGGG[A/C]AAACTGGCCCTAAAAAGAGGGTGGCAGAATACCTG
Affx-1205096286	CM037938.1	1	55101370	T/C	T/C	F	GACTCTAGAGGGTTAACAACTGTGTTGTTATGAAA[C/T]GTAACCCACCCATAACATGTCTCTAAAATACAATC
Affx-1205179542	CM037938.1	1	55207560	T/G	T/G	F	CAAGTATGAGAAGAAGGGTGGAAGGTGCTTCAGCA[G/T]TCTTACTCTTGCCAATACATGAATATACTGCACCT
Affx-1205096290	CM037938.1	1	55786604	A/C	C/A	F	CCCTAATGACTGAAGAGCCTGTGGGCGTAGTTTCT[A/C]CATACTCTGCTCTCTTATCTGAGGTTTCCACTACT
Affx-1205096293	CM037938.1	1	55796307	A/G	G/A	F	TCCACATCACATCACGCTAATCCCTCCCCAATAAA[A/G]TAAAACCATAAAGCAATACCAGGATTGCCTTTAGC
Affx-1205096296	CM037938.1	1	55810228	A/G	G/A	F	TTATGGTACATGTGTATGGGAAGAAAGCCTGTCTT[A/G]TAAAATACAATGAAAGTTAAAAACGCAGTGACAGA
Affx-1205096297	CM037938.1	1	55863733	T/C	C/T	F	AAATGTATTCATTTAACTGGGAATCCTTTCTTTGG[C/T]CTGGTAGAATAAAAGGCTTCAGATAAACGTTATCT
Affx-1205096301	CM037938.1	1	56004499	A/G	G/A	F	CCCTGGTCACCCTGAGGGAGAAATAGAACACACAC[A/G]TACAATAAGGATTAGGCATGCACACGCACACACAC
Affx-1205096304	CM037938.1	1	56075465	A/G	A/G	F	TTGATGCGACTGGCAATTTAAACAAGTTTTCAACA[A/G]CACTTTTGCAAAGTAATTCATTTGTAGTGGTGAGA
Affx-1205096162	CM037938.1	1	56110464	T/C	T/C	F	ATTGACACGTCCAGTAAGTTTCAGTGTTTTTGGAA[C/T]GGAAGAGATGAATTTAGTTGCCATACTTCCGAGAA
Affx-1205096305	CM037938.1	1	56391891	C/G	C/G	F	GCGCTTTGCAGTTTTTATTAGTCCTGAGTTTGATA[C/G]CATTGGTGATTAATGTCATCTAAAAAAATCTGTTG
Affx-1205096308	CM037938.1	1	56439462	A/T	T/A	F	CAAGACGCGTAAAAGTTTTTGAAATGGTTTCAAAT[A/T]GTATTTGTACACAGCTCTGGATGAATGTCTCCACA
Affx-1205096312	CM037938.1	1	56630477	A/T	T/A	F	AACCTCAATGACACGAACAGACTGGCAAAGCATGG[A/T]GGGTTTCCCAAATGGCAACCTATTCCCTATATAGT
Affx-1205096314	CM037938.1	1	56653608	T/G	T/G	F	AATATATACACATTTACAACTGTGGGTGGTAAGAG[G/T]CTGTTGGGGAACATCCATAGGTGGAGCAGCATGGG
Affx-1205096317	CM037938.1	1	56696721	T/C	C/T	F	AAAAGCACTCAGACAACATCTACCATCACAATCAT[C/T]CAAGGACTTCTCTAGTTGTTCTCCTGTTATTAGAA
Affx-1205096320	CM037938.1	1	56715776	A/G	A/G	F	ACTGGGATTTCTAACCTGGGTTTCCTGTATGCGGC[A/G]AGACTTTGATAGCCTGCTTAGCTAAAGCATTAGCT
Affx-1205096322	CM037938.1	1	56728889	A/T	A/T	F	AGATAAAATCCAATTTAAGATGAGGAAAAATCCTT[A/T]TTGAAAAAAAGGCTAAGAAGCTATGTGCAACTGTT
Affx-1205096327	CM037938.1	1	57299618	A/C	C/A	F	TGCCCCTCCATTCTAGTTCTGTTTCAACTGCCGTG[A/C]TCCACAAACTTGTGAAGAGAGTAATAGGCAAAAGA
Affx-1205096330	CM037938.1	1	57316794	A/T	T/A	F	TTCGGCGCATGTGACAAATAAAATTTGATCTGACC[A/T]AATATTCTTTCCGGCATAATGTCGCTGCAGATATA
Affx-1205096331	CM037938.1	1	57330790	T/C	T/C	F	GAGTTTATTGGTACAATTTCAATGAATTGTTTGTG[C/T]GCTCTGATAGTTGCAGGTATGACTGGAGAATGCAC
Affx-1205152922	CM037938.1	1	57552935	T/C	A/G	R	GCTTTGTCCTATGTCTGAATCAGACTCAACCTTAC[C/T]GTGGTACCTACCTGTAGCTTTGTCCTATGGTCTGA
Affx-1205152920	CM037938.1	1	57562025	A/T	T/A	R	CACCTATTATACGACAGGTCCCATAAATGGATGGA[A/T]TGTGAAGATGTTCACTAGACTGAAACAAAAACAGA
Affx-1205152916	CM037938.1	1	57584770	A/C	G/T	R	TAGCAGCCAGTGCTTGGCTTGGTGGCAGTAGCAGC[A/C]AGATACATACATTGTGTTGACATTCCATATTGTTC
Affx-1205152913	CM037938.1	1	57621354	T/G	C/A	R	CCATACCTGTTGGTTGTTCACTGTACGGTGACACT[G/T]GTGACATTGGTGATGTGGTGAGCAGGGATCCCCGA
Affx-1205152907	CM037938.1	1	57676503	A/T	A/T	R	ATCTTAAAAAGTTAGGAGCACCACATCATTTTTAA[A/T]TGGTAGCACTGGTTCTTCTATCTTAAAAAGTTAGG
Affx-1205152900	CM037938.1	1	57755112	A/C	T/G	R	AGAGCTCTCTTCCTCTTCATAATATTGTTACAGTA[A/C]AGAGCTACAGGCATTTGGATATGATGGTGCTTTAG
Affx-1205152898	CM037938.1	1	57787708	A/C	G/T	R	TTAGGGTCAGCAGGAATTAATGATGACATGATCAT[A/C]AGCTGTAAGGTCAGTGTCCTGCTTTATGGACCTCC
Affx-1205093820	CM037938.1	1	58244346	A/T	A/T	R	TGTGTGCTACGTATTTCACATCGTTATATCTTTGT[A/T]GATTTTTTGGGAAGTTTCACAATCAATAAAATGTG
Affx-1205093809	CM037938.1	1	58383912	T/C	A/G	R	CGTTGAGGCCCCAGGTTTGTGATGCCGCCGTCAGA[C/T]GCTCTTTCAAAGTAACCACAAAACAGGGAATACAA
Affx-1205093806	CM037938.1	1	58412007	C/G	C/G	R	GACTTCAACTGTAAACCAATGTCTCTTCCGTAGAT[C/G]TAACTTCTAGTGAAGTAGGAAACACATTGTTGTGC
Affx-1205093804	CM037938.1	1	58454342	A/T	T/A	R	TAATCAATAAGATAACAAGAACCAGGGGGACCTGA[A/T]TCTAGATCAGCACTCCTTTGTCTGACGTGCTTTTG
Affx-1205093800	CM037938.1	1	58506149	A/C	T/G	R	TTAAATACATTAATATAATGTATCACCTTCTGCAG[A/C]TGAATTGTGTTAATTATATAATAATGATTTAATAA
Affx-1205093796	CM037938.1	1	58620368	A/T	A/T	R	TGACATGAATAGTCTTAACATTATCTATAAGCTAG[A/T]TGGCTAGTGGTAACTAGCTGACCTAAATAACAGTT
Affx-1205093795	CM037938.1	1	58627041	C/G	C/G	R	GGGGCCAAAGACAGATGAAATACTCATTTAAACTA[C/G]ACCGTGGTCAAGGTAATCAAAAACACACGCTTCCT
Affx-1205093792	CM037938.1	1	58654011	A/G	T/C	R	GGTGCTCTTATGTCTAGTCTACACTTAGTGTAGCC[A/G]TTAGCGATGATGCTAATGATAACCATCTGCTGGTA
Affx-1205093791	CM037938.1	1	58679717	T/G	C/A	R	AATAACACCCTACACCTGATACGACTATAATATTG[G/T]TTTTTTAAAAGGTAGGCTAATTTAACAGATATCTG
Affx-1205093790	CM037938.1	1	58686805	A/T	A/T	R	CTTGTATCCATTACTCTGTCTGTGAACATGAGAGG[A/T]TCCATTTCTCCAGCCCATCCCTCGGCTGTTTACCA
Affx-1205096567	CM037938.1	1	59635947	T/C	G/A	R	CCCCCCAAAATATTAGAAATAACAAGAAAACACTG[C/T]ATACTGTTGTAAGTGTTTTATTAAGAGATTGAGAC
Affx-1205096564	CM037938.1	1	59687412	C/G	C/G	R	TTCACCCATCCAGAGCAGCAAGCAATTTACAAAAA[C/G]TACTTTACCTTAAAGCTACATACTCACTGTACGCT
Affx-1205096561	CM037938.1	1	59698573	A/T	T/A	R	TTCCAAAAAGTAATTCCATTAAATGTAAAAAAAAA[A/T]TTAAATCCACAGGAGCCTCAGTGTTTCACCACCAC
Affx-1205096558	CM037938.1	1	59711390	C/G	G/C	R	AATAACCACTAGTAAATAAAAACAAATAAAAACTT[C/G]TCAGTCTTGTCCGGTGTACAATAACCAATCACAGC
Affx-1205096556	CM037938.1	1	59722254	T/G	C/A	R	TTATGTAAAAATGGAATTTAAATATTATGTTTATA[G/T]TTATAGGACCTATTTGCTCAATTGAATAGTAATGT
Affx-1205096554	CM037938.1	1	59730621	T/C	A/G	R	TACTCATTGTTGAGGAGACACATTTTTTTACTAAT[C/T]TGACCTATTCGATCTTCTGTGCAATTTACAGAGAA
Affx-1205096551	CM037938.1	1	59742639	T/G	A/C	R	AAAGTCCCTCTATATATATACTCTCAACAATTTTT[G/T]GGGTAAACCTAACCAACGTTTCAGCAACGCAGTAC
Affx-1205096548	CM037938.1	1	59759460	C/G	G/C	R	GTCAAAAGTAGTGCCCTGTATGTGGAAACGGGGAG[C/G]ATATGGGAAGCTCTCGCGGTAAGTGGAACAGAAGG
Affx-1205096545	CM037938.1	1	59787542	T/G	C/A	R	ATTAAAGCTCTCATACGTCTTAGAACGAGTTCCAG[G/T]GAAATAAGAGCACCTCAATCCAAACTCCCCCCTCC
Affx-1205096544	CM037938.1	1	59804506	T/C	A/G	R	ATCCAGGCCCTGGAGAAGGCACAGTTACGCCGAAA[C/T]GTTGGTGATTTACCTAATAAATTACACAGAGTTTA
Affx-1205096543	CM037938.1	1	59818078	T/C	A/G	R	ATTGAAGAGTAACATCAACCGCTAAAAAAGGCCTT[C/T]AGAACCGTTCATTTGAACAGTACATGATGACTGAA
Affx-1205096541	CM037938.1	1	59882870	C/G	G/C	R	ACACTGCACTGGGTTATCACATGTATTACAGAATA[C/G]TTTCTATTCTATTCTATTATATTGCATTCTACTGT
Affx-1205096540	CM037938.1	1	59917292	T/G	A/C	R	GCTTAGTGGGACACACCCTTGTGGGACACACCCTT[G/T]TGGGGCCCCTGTGTTGAGGATCAGCGTAGTGGAGG
Affx-1205094257	CM037938.1	1	60145709	A/G	T/C	R	ACTGAGCAGGCCCATTGGGGCAAATCTCTGATGAC[A/G]TCTCCCTCTTGTACAGTTAGAAGCACATGTAGTGA
Affx-1205094256	CM037938.1	1	60160396	A/T	A/T	R	TACTTTCCATTTAATGAACTTCAGACAATAAATAT[A/T]TTTTTTTTTTACAAAACTCATTGTCATTGTTGCTT
Affx-1205094253	CM037938.1	1	60205623	T/G	C/A	R	AGCAGTAACATGTGAAGCAGCGATTACAGTGATGT[G/T]GACTAGTGACAGCAGTAACATGTGAAGCAGAGATT
Affx-1205094250	CM037938.1	1	60227528	A/G	C/T	R	TGATTCCGGGAATAAACTTTAATAAATATTCTCAC[A/G]GAAAAATAACAAGAACGGAGTGCAGGGTGTGCAAA
Affx-1205094249	CM037938.1	1	60239017	A/T	T/A	R	CAGCAGCTTTTGAAATGAGAGAGAAGGTGAGTTGT[A/T]GCCCCACAGCCGTTATCCACATAGAAATGCATTAA
Affx-93383327	CM037938.1	1	60316095	A/C	G/T	R	ATACTAGATGCATTTCTGACAATAACAGTTGATGG[A/C]CAGATTATTAGATGATAGTTCTCTATGGTGTCGCT
Affx-1205094248	CM037938.1	1	60317720	T/G	C/A	R	GCCACAAGGACAACAGTGGCTCAGCATCTGCCATG[G/T]CGTGCCTTTAAATTCCCCAGAGGGGAGAAATCATG
Affx-517057038	CM037938.1	1	60330117	A/G	C/T	R	CTTCGTTATGTGGCCAATGTGTTTCCACACAAAGG[A/G]TACATCTGGAATTATGGAGCCATCCCACAGGCACG
Affx-1205094245	CM037938.1	1	60341237	A/G	C/T	R	ACCGGACATGAGAGGTCCAGAGGTGTCCAGCGGAA[A/G]CAATGAGATTGACCTATCTCTCTGTCGAAGAGTTG
Affx-1205094243	CM037938.1	1	60373758	T/C	G/A	R	TCAGACCATAGAAAAGGAGAACTGTGGAGGGCTTC[C/T]CTCCCTCAACACCAGCGCTCCCTCCCTCCCTTCCA
Affx-1205094242	CM037938.1	1	60382220	T/G	C/A	R	GTCGACCGATAAATCTGAATGGCCGATTAATTAGG[G/T]CTGATTTCAAGCTGTCATAACAATTGGTAATCGGC
Affx-1205094239	CM037938.1	1	60484791	A/C	T/G	R	AACAACAAAATCATGGCCTTTTCTCATTGTTATTT[A/C]ATTTTTAATTTAAATTTAACCTTTATTTAATTAGG
Affx-1205094238	CM037938.1	1	60570568	T/G	C/A	R	AGGTATCATTAGTTACTGTAGGTATCATTAGCTAC[G/T]GTAGGTATCATTAGTTACGGTAGGTATCATTAGTT
Affx-1205094237	CM037938.1	1	60590986	T/C	A/G	R	GTGCAGATCTTTACATAGTGCAGATCTTTACATAG[C/T]GCATAATCTTTACATAGCATAGATCTTTACATAGC
Affx-1205094236	CM037938.1	1	60602339	A/C	T/G	R	GATAATTATTTCAACATTCAACAATGTTACTTTCA[A/C]AATGATTGGAAAACGTTTGACTGTGTGTTTTTCTC
Affx-1205094233	CM037938.1	1	60646459	A/G	C/T	R	ATAGGCCTCAGATCAAAAGTAACGCACTGTATAGT[A/G]AATACGGTGTGGTTTAGTAAGTAGACAAATTCTCT
Affx-1205152811	CM037938.1	1	60845097	T/C	G/A	R	AAAACAGTTATAGACAAGGACATTATATACAAATA[C/T]AAAAAATAATAAGTTGTATATTAGAAAGACACCAA
Affx-1205152810	CM037938.1	1	60883494	A/C	G/T	R	CTCAATTGGACTCCACCCTGCCTAATGAAAGAATT[A/C]ATTGTGTATAATACAGTCCTATCATTCCATATCTG
Affx-1205152809	CM037938.1	1	60914446	A/C	G/T	R	AGAACATTACAGAACATTACAGAACTTTACAGAAC[A/C]TTATATTACTTTACAGAACATTATATTACTTTACA
Affx-1205152559	CM037938.1	1	61622580	A/G	T/C	R	TGGAACTTTATGACAAAAATCATTCAACTTTTTTT[A/G]TCAATTCTGCAACATAGGGCGTTTTTAACCAGAGA
Affx-1205152556	CM037938.1	1	61768938	A/G	C/T	R	GGTTCTTATTCACTTCAACTAAGACTTCCTGATTC[A/G]CTCTGATTTTATTGGCCTTTAGAGCGCTGTTGTCA
Affx-1205152554	CM037938.1	1	61778510	T/C	G/A	R	AACAACCACATTATCACAATCATTTGGTTGTTGGT[C/T]GGGTCCGTCATCCTTTTGGTTATAGGCCTACCACT
Affx-1205152552	CM037938.1	1	61794835	T/C	A/G	R	GGGAGGAAGCGGTACTCGCTAAGCAAGCAGTGGGA[C/T]GTCCTTTACAAATCTGGAGATTTACAATAAATAGC
Affx-1205152551	CM037938.1	1	61805625	A/G	C/T	R	ATAAAACATTTTAAATCAATGCCACTTGATTGCAC[A/G]TTTAAAATCTAACAAAACACATGTAAGATTCAGAG
Affx-1205152549	CM037938.1	1	61820384	A/G	T/C	R	TCCAGTGTGCCCTGGACAAAGAGAAGCAGTCAGAC[A/G]AATCAACCCTTCACTAAGCTCCGCCCCCCTTGGTT
Affx-1205152547	CM037938.1	1	61853705	A/T	A/T	R	CATTACCTGTCAGTCCTTTCATCTAGAGCGCTGTA[A/T]ATAAGTTTAAGAGGGATTATATTTCCCTAGCCCCA
Affx-1205152546	CM037938.1	1	61859752	T/G	A/C	R	ATATATTAAATAATGTAATACTATAATTTAAAATA[G/T]AAAATAGAATGACGAAGCTGTAAAACATTATCCTA
Affx-1205152544	CM037938.1	1	61875513	T/G	A/C	R	ATGAGTTGAATAGAAGGAATGGAAGGAGTTGAATA[G/T]AAGGAGTTGAATGGAAGGTGTTGAATAGAAGGTGT
Affx-1205152541	CM037938.1	1	61888512	A/C	T/G	R	TAAATCCTTTCTGGAGGTTGGAATTTGGTCTCCAT[A/C]AATGATCTCCTGCCGGACTTTGATGAGGCTCTGTC
Affx-1205152540	CM037938.1	1	61898715	A/G	T/C	R	TAATATGCATAAATATTGAAGGAATATTTGAATTT[A/G]CAGTATACAAACTTAACATGATGAACAGGAATGTA
Affx-1205152536	CM037938.1	1	61936482	T/C	G/A	R	AACTGCTGCTGCACCAGGCGCTCAGTCTGCTGTGC[C/T]TGGCTCTGCAGGGGTAAACGGGAATAGGGGACGAC
Affx-1205097264	CM037938.1	1	62095582	A/C	C/A	F	GTCTAGTACTTTCTGGACCAATCACATGAAGCGTT[A/C]ATTTAGGTCAACAGCCCAGAGACTTGCTTCACACA
Affx-1205097265	CM037938.1	1	62100796	T/C	T/C	F	TCGTTATAGACTAGATCTTTCGGCAGTTGTTGGTC[C/T]TCGCATTCACGGGTACATAATTCCTAGCTGCAGAC
Affx-1205097266	CM037938.1	1	62109389	T/G	T/G	F	TGGCTGTTTTCATACCACTGCAATTCATTCAAAAC[G/T]TGATGAAAACATACTACTACACAACGTACTATAAC
Affx-1205097270	CM037938.1	1	62130081	T/C	C/T	F	TAGTGACAGATGTAGTTAGCAAATATCTGACCTTG[C/T]TATGCCTGGTGAAGAGAGAACAACTGTTAACTAAC
Affx-1205097273	CM037938.1	1	62208218	A/T	T/A	F	TGCCTCAACAAGGTAAGCTGGGGAAAAAACAACAA[A/T]CAATTAATGAAAACCAATTCAGTTATATAAAGCCT
Affx-1205097277	CM037938.1	1	62229012	A/G	G/A	F	TGCGGTGCGGTACAGTGGCTTGGCTCAGGTGTCTC[A/G]GCCTCAATGTTTCTCTCCATATAGACTGAGTGTGG
Affx-1205097281	CM037938.1	1	62236434	A/G	A/G	F	TGGAGAAACAAATAATGTCATTCCTTCTCTTCTGC[A/G]GCACAGAGCTTTGAGATACCACAAAATCAATACTA
Affx-1205097283	CM037938.1	1	62242661	A/C	C/A	F	TGAGACATTTGGCTTGCTTAGATTTCCCTTTATGC[A/C]GTGTGGGGAAATGTAAATAAATACTTAATAGAGGT
Affx-1205097288	CM037938.1	1	62272565	A/G	A/G	F	GCTACAATGATTACGGATAATCTTGAAAGATTCGT[A/G]AATAATGATGTGTAAAAAAGTTAGACAAACAAATA
Affx-1205097291	CM037938.1	1	62361453	A/G	A/G	F	GTTAGAATCTTCCACATTCCTTTCAGGGATACAGC[A/G]GTAATGTTGAACTGATGTTAATATCTTACACAGAT
Affx-93280445	CM037938.1	1	62381241	T/G	G/T	F	GAAACAAAAGGAAAAGGTTACAGGTACTCAACTCC[G/T]ACTAAAAAACTTGACATTTAGATCCTGACAGACCC
Affx-1205097297	CM037938.1	1	62386975	T/C	C/T	F	TAGAAGTTTACTGTAATGCTTAACATACATGAATA[C/T]TGAGTGGAATAAGAATTGTTATACTGAGTGGAATA
Affx-1205097299	CM037938.1	1	62394057	A/C	A/C	F	AGAGTCAAACACGGCACAACACATTGAAAACAACC[A/C]TGCATTCTCTGGGAGCAGGCATAGGTTACGTCCCA
Affx-1205097302	CM037938.1	1	62406904	T/C	C/T	F	TGCTATCTTACCCAGCTGGTGATGCTGAGATGAGA[C/T]AAAATGTCAACATTACAGGGTTGAAATTGATTTTC
Affx-1205097305	CM037938.1	1	62455481	A/C	A/C	F	GGAGATAATTTTCTATCCTCTTACTACTGAAACTT[A/C]ACCATGATCCATATCCCCCTGCATCTTCACAGCGT
Affx-1205154825	CM037938.1	1	63223969	C/G	C/G	R	CAATGGCAAAATACAAGCAATAATGTGTTCTGTGT[C/G]TTCTTGATGCTCCCGTACCTGTGGGTCTGTCATCC
Affx-1205154823	CM037938.1	1	63237943	T/C	G/A	R	TCCTATAGGAATGTGTGTTTTGGAGTAAATGGGAA[C/T]TTCACTCCAAATAAATGGGACCTTCACCCCAAAAG
Affx-1205154822	CM037938.1	1	63258804	A/T	T/A	R	GACTTGCCTAGTTAAATAAAGATTAAAAAAAAAAA[A/T]AAATGGAATAGAAAAGGAGAATAGGACTTGAATAT
Affx-1205154819	CM037938.1	1	63361765	C/G	G/C	R	ACACAGACCAAACTCATGTCTGAAAACTTCCAAGG[C/G]TGCGTCCCAAATCGCACTTTATTCCACGATATAGT
Affx-1205159786	CM037938.1	1	63377987	A/C	G/T	R	CACCCATGTTCTGTACCACACATACCATGTACCAC[A/C]CATGTCCTCTACCACCAATGGCATGTACCACCTAT
Affx-1205159785	CM037938.1	1	63387731	A/G	T/C	R	ATCAGATCTTCTGCGAGTAATTGGACGGGGGGGGG[A/G]AAAAAATCAAATTAGTCTGCCTGTGTAAACGTAGC
Affx-1205094992	CM037938.1	1	64008081	A/G	C/T	R	ATGGAATTTCAGCAGAACTTGTATTCGTAGAATAC[A/G]TTGAATGTCCCAGATTGCATCATATCCCCTTTTTT
Affx-1205095005	CM037938.1	1	64586869	A/G	T/C	R	CCAAATCCCAGCAGAGATAATTTGCTGTACGTTTA[A/G]GTCCGGTGAGAACTCTGGCTGTCTGTGTTAAAGAG
Affx-93302615	CM037938.1	1	64591531	A/G	A/G	F	GTGGGAAGAGTGGAGCACTAAAGGAAAAGTGGAGC[A/G]CTGTGGGAAGAGTGGAGCACTGTGGGAAGAGTGGA
Affx-1205154548	CM037938.1	1	64602181	T/C	G/A	R	TTCATGGGAGTGGGTAAACATTTCAAACATAGCGT[C/T]GCCGTGTCCTCAACTGCTTGTATAAAATCTGTATA
Affx-1205095000	CM037938.1	1	64621634	A/G	C/T	R	TGATTACTATTAAATAGAGTTACAACTCTGTCTTC[A/G]CGTTTGCAAACAAACATATTCGATTCATGTCTGTC
Affx-1205155007	CM037938.1	1	65368714	A/G	C/T	R	ACATGTTTTCATTTCGTTATTATGGGGTATTGTGT[A/G]TAGATGGGGGAGATGTTTTGTTATTTAATCCATTT
Affx-1205155005	CM037938.1	1	65472539	A/C	T/G	R	ACAAAGAAACCCGAGTACACGGCTTGTAAAAAAAA[A/C]AACCCACAAATGCTGCGTTTCAATCAAATAGTCTA
Affx-99000406	CM037938.1	1	65477732	A/G	C/T	R	CGCTGTAAGATGTTACGCGTTGTGGCAGTGCTTTG[A/G]TTCTGGGGTTATGTTCTGTGGTTGAGTTGTGTTCT
Affx-1205155002	CM037938.1	1	65494852	A/T	T/A	R	TATTGTTGCTCCTTAACTATTTGTAATATTTATAT[A/T]TTTTTTTAATTTTCTTAAAACTGCATTGTTGGTTA
Affx-1205155000	CM037938.1	1	65510652	T/G	A/C	R	TTGCATCATATGATGCAATGATAATAATAAAAAAT[G/T]GTTAAATCTTTCCTTTAAGTTATTATTGCTCTAGA
Affx-1205154997	CM037938.1	1	65531303	A/G	T/C	R	AGAGAGGAAGGGAGGGAGAGAAAGAGAGAGGAAGG[A/G]AGGTTTCTAGGCTGCACTTCCACCATGCAACCCAC
Affx-1205154995	CM037938.1	1	65600789	T/G	C/A	R	AGTGATTTACGTAGGGACATCTTCACATAGGAGAC[G/T]ACTTGCTTAGGCTTACTGAAATTGAAATCTGGGAA
Affx-1205154993	CM037938.1	1	65606229	A/G	C/T	R	ACGTTAACAGATTGTTCAACGTCTATGATCACGCC[A/G]TCATACATCACTGCAATGAGCCATCACACTGATGA
Affx-1205093866	CM037938.1	1	66298646	T/G	C/A	R	CCACTATGACCATGTGACTTTCACTTACATGTGCC[G/T]ACACACACACAGAGCCGCCCTCCAACAGAAGCAGA
Affx-1205093865	CM037938.1	1	66310907	T/G	A/C	R	TCCCGTTTGGCCTGGTGTGCTGCAGCTGCAGAGTA[G/T]CTCCGGGGCGTTTTTTGACCCTTCTGAGGGGCCAG
Affx-1205091134	CM037938.1	1	66626762	A/G	G/A	F	TCTGAGAAGATGCGATTCTTCGATCCACAACTGAA[A/G]GAGAAGGCGGATCAGGAGCTCTTCAACGAGCCAGA
Affx-98663660	CM037938.1	1	66641413	A/G	C/T	R	GAAGGGGAAAATGAGCCAGTGAGGTGTGCTGCGAC[A/G]CCCTCACACACTTGCTAAAAATAAAACCAGGCACC
Affx-1205091135	CM037938.1	1	66723667	A/C	C/A	F	CACAGTATAAAGTACTTACCTTCTCCAACTTCTCT[A/C]TTAAGTTATATTCCACCATTTCTTTCATTTCTGGC
Affx-1205091136	CM037938.1	1	66822400	T/G	T/G	F	CGGGCGTCAGTAAACGTAGACAAAAAAAGTCAGAA[G/T]TAGTCCAGAACACTCTAGATAACATGTAAACAGCC
Affx-1205091138	CM037938.1	1	66886973	C/G	G/C	F	AAAAAATTGTATCACATTTTAGTCCTGTGTAACTT[C/G]ACATATTTTGTTACGTAACTCAAATAATTTGTGGA
Affx-87879789	CM037938.1	1	66919989	A/C	G/T	R	ACGCATTTCAGGAAAACATGTTCCATATGGTTGGC[A/C]CCAGCCGGATATTTGAAAGACAGGTATATAATGGA
Affx-1205091141	CM037938.1	1	66945940	A/T	A/T	F	AAATCCCCTATGAGAAAAATGAAATGGTGGGAAAC[A/T]ATTTGAACAAGTTCCCTGTTTGACCTCTAGGTTTT
Affx-93425908	CM037938.1	1	67002953	T/C	G/A	R	GAAATTCGATTTTTCTACAATATCAACTGAGATGA[C/T]TCAAACGTTTGTCGGTAACTGTGCTCAGTGGCATT
Affx-93366367	CM037938.1	1	67013048	T/C	G/A	R	CCCCTGTGCAAATCTGCAATATCGCAACAAAGAAA[C/T]TAGCAAATTAGATCAATAGTATACGAGAATAGAAA
Affx-87898789	CM037938.1	1	67200467	T/C	T/C	F	TCTTAATTATCTGTACAGACCAATGATTACGACGG[C/T]GATTCTGACCTAACCATAAATGAATATGTTGTGCA
Affx-1205091145	CM037938.1	1	67264071	C/G	C/G	F	CAAAAAAATCTAAGCTAATGGCAGATTTCTTGATT[C/G]AGATGTTTTTTTGCACATGCTCAATGTACACTTAC
Affx-517056980	CM037938.1	1	67623380	T/G	A/C	R	TTACTGACTTGCCTAGTTAAATAAATGTCAAAAAT[G/T]TAAACCGTTTGTTTCTAAATTGAGCGGTAACAGTA
Affx-1205178589	CM037938.1	1	67697532	A/G	G/A	F	AAAAATGTAAAGCATCAATAGAGGACCAAGATGGA[A/G]TCCTACTACACCGGTTCTGATGCTCGTCGGATGTG
Affx-88025453	CM037938.1	1	67715231	T/G	C/A	R	ATTATCAATTTGCTACTGTATAGATTAAAAAAAAT[G/T]GATTCCAACAATAGCTTGTAGACCAGGTATTCCCA
Affx-1205091151	CM037938.1	1	67744335	T/G	G/T	F	TGACATTGGCGGGCTTCATATGGGTGGGCTTGGGG[G/T]ATTTCTGAGTGATGGTGTAGGTTTTGGGGGAGGAT
Affx-1205091153	CM037938.1	1	67791795	T/C	C/T	F	TGTCTGATTTGACTCTCCGAGGGGAAATTACATTC[C/T]ATTTACATACCATTCATAATAAAATAATTAGACGG
Affx-88006419	CM037938.1	1	67794500	T/C	C/T	F	CCTGTGCACTATTACTGCCTTTTTGGTATTTAACT[C/T]GAGATCGAACCACTGACCGGCATTCTGAAGAGGCA
Affx-1205091155	CM037938.1	1	67827384	T/G	T/G	F	CTCAAGTCATGATTACCCGATCACCCAATTACAAT[G/T]AAATCCTCTTCATACTCCATCGTTTCTCTTAATTT
Affx-1205091156	CM037938.1	1	67841267	T/G	T/G	F	GGCGACCATCTCTGTCGTCGCCATGCTGAAAAAAT[G/T]TAATAAATAAATATAAAACAAATAATAAAATATAA
Affx-1205091159	CM037938.1	1	67899054	C/G	C/G	F	TACACACAGTCTAGAATAGGCTACCTCAAACATTC[C/G]TCTTATTCTCGATCAACCTTTTTCTTAACATATTT
Affx-1205091161	CM037938.1	1	68007530	C/G	G/C	F	GTGATAACTGCAGTGACCAAAACAAGAACAGATTT[C/G]AGCTCTGGTATTGTAGCTGGAGGACCATGCACAAG
Affx-1205091162	CM037938.1	1	68033873	T/G	G/T	F	AGGAGCGATACCCTGGCCTGGAGCTGATGGAAAAA[G/T]AAACCGTGCTTGCCCAAAGTGTCACGCCCTGACCT
Affx-1205091167	CM037938.1	1	68346863	T/G	G/T	F	TGACAAGAATGTCGTCGAGGTAAACCGCTACCTTG[G/T]GTATCCCCTGCAGAACTCCCTCCATGGTTCTTTGG
Affx-1205091377	CM037938.1	1	68532578	A/T	A/T	R	AAAACAACACTACAACAGACACAATGGTCTTGTGG[A/T]ATTCATTCGCACTCTGTTGTTCATAAATGTAGCTA
Affx-1205091375	CM037938.1	1	68745888	A/G	C/T	R	TTCTGTCAGCTTGTGTGGCTTCCCAATTCGCGGCT[A/G]AGCCGTTGTTGCTCTTAGATGTTTCCACTTCATAA
Affx-1205091372	CM037938.1	1	68944752	C/G	C/G	R	GGATGGATATAGGTCTGGAAAAGTTTTGTTCTAGA[C/G]TGTCACCCCCTTTGAAAAGGGGGATGACTGCGGAA
Affx-1205091363	CM037938.1	1	69334768	T/C	A/G	R	AACACCTCGACGTTGCTATCAAAATAAGCTGGTGA[C/T]AATAATGTCAACATGAAGCATAAAATAAATTGGAT
Affx-1205091360	CM037938.1	1	69390667	A/C	T/G	R	GTACAGAGGGAGGGAGGGAGGCTGCCCTGCCTGCC[A/C]ATCTGCACCCAGTCAATTGTAGGTTGTAGAGCCGT
Affx-1205091358	CM037938.1	1	69480445	T/G	A/C	R	CATGTTTATTTCGACATCATAAAGAAAAACTTTTG[G/T]AAATAATAGCAACACTGCCATGTTGATCGGAGCCT
Affx-1205091357	CM037938.1	1	69497002	T/G	C/A	R	ACACAACAACAGAAATTCTAGTAGAAACGTTTTTT[G/T]GGGGGGGGAAGTAAGTTTCAGTATAGCGTGCATCA
Affx-1205091356	CM037938.1	1	69518665	A/C	G/T	R	TTTGAGACAAGTTCAGGTACCTCCCAGTTTCACCC[A/C]AAAAAAATGTAACGTTTTCTAATGCACACAACCCA
Affx-517057057	CM037938.1	1	69606783	T/G	G/T	F	CTTTTACCTTATCATAAATAGACATAATTGCAAAT[G/T]ATTAAATCCTAAAGCTATTTAGTTACGAATTGAAC
Affx-1205091352	CM037938.1	1	69630151	T/C	G/A	R	CGATGAAAGCCATGTAAATACTGTCTAATATCTGA[C/T]TGCCGTAAGCTACCAGTGTCTACAGCTGCAGCCTG
Affx-1205091351	CM037938.1	1	69776303	A/G	C/T	R	CTAAGGGGGTCGGAGGGAAACCAGAGCTGAACAAT[A/G]CACTCTTTACGCTCGGTGGGAAACTCTAGACCTTC
Affx-1205091349	CM037938.1	1	69828255	A/C	T/G	R	TATAATAAACAAATGTCTTTACAGTGCTTCATATT[A/C]GTTTCTAGGGCAAAACATCTGCTTATGGTGCTCCT
Affx-1205091347	CM037938.1	1	69836807	T/C	G/A	R	AGAGTGGACATTTAGCAAAAAATTCTAATTTACTG[C/T]AGTCAAAGGTGAAACATCAGGGTAATTCTTTCATA
Affx-1205091344	CM037938.1	1	69843448	T/G	C/A	R	AATCTTCCCAGTCACTTGTCTGTGATAAATTTTCC[G/T]AACTGAAACACTGACAGGGAGACACACACACTATC
Affx-1205091343	CM037938.1	1	69854800	C/G	G/C	R	AACAGACACTGCTCAGTGAGGCTCTGCTCTGTGAG[C/G]CTGGTAATGTCTGGTCTGGCTGCCTCTGCTGTCTC
Affx-1205091337	CM037938.1	1	69948937	A/G	C/T	R	AGAAAATGGAGAGAGGGATGGAAGAGAGAGGAGAG[A/G]GAGGAATTTCAATGGCGTATTGCTAGGAGTTGCAG
Affx-1205091336	CM037938.1	1	69955690	T/G	A/C	R	TGATTTAGTGGTAATGCTGTAGCAGAACCAAAGAC[G/T]TTTTACATTTCCCATGGGAATCCACCAAAAGGTAT
Affx-1205091335	CM037938.1	1	69968938	A/G	C/T	R	AATGAGGCCTCCGTTTACATCCTATTTCATGAACC[A/G]TAACAAACATTTTAGTTAAGCTTTTAATCTTGATA
Affx-1205091333	CM037938.1	1	69996713	C/G	C/G	R	ATTAATTATTCAGGCCTACTGTAAACTGTAAAATA[C/G]TATCCTATTAGGGGCCCCATACAGGTCTCTCACAT
Affx-1205091332	CM037938.1	1	70001693	A/T	A/T	R	CATGTAGATTATTTTTTTAATGTTTAAAAAAAATA[A/T]ATATATTAATATAATGACAGTAAAGCAGTTATACT
Affx-1205091330	CM037938.1	1	70011675	A/G	C/T	R	ATAGTAGCCTACTCTGACAACAATTCTGTGAATTG[A/G]ATGTGGTGGCAGACAGGTTGGTGTTTTAAAACAGC
Affx-1205091327	CM037938.1	1	70038568	T/C	G/A	R	CTGAAGAACCAGCTACAAGCGATAGAGGTAACTTC[C/T]TCAGTTTCAAAGGTCAAACAATGCTAAAAAAAAAT
Affx-1205091325	CM037938.1	1	70062566	T/G	C/A	R	ATTTCCCATCCTATAGAGAGAGAACAAGAAAAATT[G/T]GATTTTGTTATCTGCTCTTCTTTCAGTGAATGCCT
Affx-1205091322	CM037938.1	1	70075044	T/G	C/A	R	TTAACCAGTAAAACCAGAAATAGAGTACAACTATT[G/T]GGTGGAATGTGCTTTGTGGTTCCCGAACAGGCAAG
Affx-1205091320	CM037938.1	1	70092433	T/C	G/A	R	TTACAACTTTTAAACATCTCCAAACATTCCAATAG[C/T]GCGCAGTTGCATGTGCTTTAGACCATTTTACTGAC
Affx-517057065	CM037938.1	1	70151308	A/G	A/G	F	GTAGATAGATCAACACTCCAGTTGATATAACATTG[A/G]CGATCTGACGTTGTTTCAAAGGTACAAATTCTAAA
Affx-1205091317	CM037938.1	1	70220873	T/G	C/A	R	TGCCGGTGTTTTCCTTAATGCCTGTCAAAATAAAT[G/T]TATTCGCCACATTTCTATCATCACCACCGCAGGAT
Affx-1205091315	CM037938.1	1	70297883	A/C	G/T	R	TTTTTTATTAATAAATTTGCAAACGCAAAAAAATA[A/C]AATATTTGCACTGTGGTTTTGGGGTATTATTAGAT
Affx-517057069	CM037938.1	1	70305967	T/G	T/G	F	CAATACATTGGGGCTTTGACATTCAGAGAGGAACG[G/T]CCTGGTGGTGGCGGCAACGCACTGTTTACCGGCAT
Affx-1205091314	CM037938.1	1	70316854	T/G	A/C	R	ATACACCCATTGAGATTTTATGTTGGCAAAAACTG[G/T]TAGTGGTAGTGTACGCGGTAGCTGACTAATGCTAG
Affx-1205091313	CM037938.1	1	70326440	A/T	T/A	R	CCTCCACCTGCTTCCCCGGCAGGTTTTTGTATCTC[A/T]CCCATACTTGCTTCCAAGTCCAGTCTATTCTTTCT
Affx-1205091312	CM037938.1	1	70347863	T/G	A/C	R	ACTATTTAACACAGCCACAAAGTAATAATTATGGC[G/T]AAACCCTGTCCATTTCCATAATTTCTCTTCTTAAA
Affx-1205093307	CM037938.1	1	70459233	T/G	T/G	F	TGGGAATTTGATGGCGTTGTAATACGTATAAAAAT[G/T]TCTGTGTTACCTCAAGAAGAACTATATTCAACAAA
Affx-1205093308	CM037938.1	1	70554036	A/G	G/A	F	GACTCAGTAGAGGTGTACCCCAAGGCTCAGTATTG[A/G]CCCCCCTTCTTTTCTCTATATTAATAAATGAATTG
Affx-1205093309	CM037938.1	1	70568144	T/C	T/C	F	CGGAACAATATATTTGGCGATCCAAAAACATTCTT[C/T]GAATGTTTGTGGGACGTTATCATCCTAATGTTAGC
Affx-1205093311	CM037938.1	1	70594506	T/C	T/C	F	AGTCTCAAATGACACCCTACTCTCTTTATAGAGCT[C/T]GCCTAAAAGACTGAAATTAGTTAGCTCTTCTCCGT
Affx-1205093312	CM037938.1	1	70609795	A/C	C/A	F	AGAGAAACGTGTGCTCATTTTGTAGGCTATTACAA[A/C]AGTGTTCCACAAATGGCCATGTTTCCCTGTCCTAG
Affx-1205178858	CM037938.1	1	70632824	T/C	T/C	F	TTCTTGTTTTTGTTTTGGGTGATAGGTAGATACCC[C/T]GTTGAGAACATGGAACAGCAGCTATGACTGTTTGA
Affx-1205093316	CM037938.1	1	70643794	T/G	G/T	F	GGGGAATCACTGAATGGTCCTGGAGTTGTGTGAAC[G/T]CTTCCACACTTACTTCAAGTGAGTCGCTCTAGATA
Affx-1205093317	CM037938.1	1	70654534	A/G	A/G	F	ATGTTTCAACTTCTCCCTTCATTTTGTTATACAGT[A/G]TTGGGATGGCGACTTGGGAAAAATATGTGCGAGAT
Affx-1205093318	CM037938.1	1	70672569	A/G	G/A	F	ATTGGAGTCATTATCAAAGTATTGTTGAATTAATC[A/G]TCCAACCCCTATGAATAAATTAAATAATGGTGCAA
Affx-1205093320	CM037938.1	1	70682601	A/C	A/C	F	AGTTGCATTGGAGGAAGAGGGCCAAGGTCCCCTCC[A/C]TTCGGACCTTTCGATGCATTTTGAGGATGTGCAGA
Affx-1205093325	CM037938.1	1	70712095	A/G	G/A	F	CGACCCTCCCACTGTCTGCCGAATTCTCTCTTTAC[A/G]CTCCTTTTCCTTGATAGGATGACGGTGGGCGGAAT
Affx-99000369	CM037938.1	1	70715184	A/G	A/G	F	CTGTTGCTGTTCTGACCCTTTGGGATTCGCGTCAC[A/G]TTGTCGATGCAGGCTTCAAACCAGGCACCGATGCT
Affx-1205093327	CM037938.1	1	70730306	A/T	A/T	F	ATTCCACTTCTCGAAACTTTGAGAGACGTAACAGT[A/T]CCCAGTTTGACCTTTACCCAGCTTGAAACATATGG
Affx-1205093328	CM037938.1	1	70747513	A/G	G/A	F	GGTTAGCTAGCTACGTCCTATTGAAATACAGGGCT[A/G]CCAGCAACATGAAAGTGCAAACTGAAACCTGCAAC
Affx-1205093329	CM037938.1	1	70759306	T/C	T/C	F	AAAAAAAGAACGTTCTGACCATTGACATCCCAGTA[C/T]ATCCAGTCTGAGTCTCTTACCACAGGTCTGAGCTC
Affx-99008600	CM037938.1	1	70852923	T/C	C/T	F	ACTATACCGTACTGAAAGCAGAGATGGAATATAGC[C/T]AAGCACGTCAATGCTGTGTACAGTCGTCGTGACTG
Affx-1205096245	CM037938.1	1	70956901	A/G	C/T	R	CTGACGTTTCCTAAAGGCCATGTTCTTGACCGAGC[A/G]GTAAACCAAACGCAAACAATAGAGACCTTCTCAAA
Affx-1205096240	CM037938.1	1	71120270	A/C	T/G	R	TGTGGGTCTACTCTCGACAGTTTATAAGGTCTAGA[A/C]AGACTCAGTAGCCGGCCAGTCTGGCTTTGTTTTTA
Affx-1205096238	CM037938.1	1	71139045	C/G	G/C	R	TTCTTACCAGCCAAAACATTTATTTCGTTTTTCCA[C/G]GTTCCTGATTTCCCCTAGTGTTTTTCGGTTTTCAC
Affx-1205096237	CM037938.1	1	71170988	T/G	C/A	R	TTGATCATCAAAGTACAGATAATGTGCTACAAAAA[G/T]TATGCATATAATATGCTGGTAAGACATCCAGCATA
Affx-1205096235	CM037938.1	1	71317844	A/G	T/C	R	GGCAAAATTGGTTTGACTTTGGATAGCCTATATAC[A/G]GGGCTTGTTAGGTGCCGTCAATAAATTACAAAATA
Affx-1205096231	CM037938.1	1	71346351	A/C	T/G	R	CGCCGCAAAGCGTATAAAAGAGGGGCAAAGTACGG[A/C]TTTTTTAAACTGATTTGACTCATGATTCTTCGACT
Affx-1205096228	CM037938.1	1	71354042	C/G	G/C	R	TTGATTTAAGCCCTTAGAAAATATTCTTGAAAATT[C/G]ATAGAATGTGGTGACATTGTGACTTGCGTTTCCTA
Affx-1205096227	CM037938.1	1	71358935	A/T	T/A	R	GTCAACTTGACACAATTCTATATGACTTTTGTAAA[A/T]AGCCTAAAGTTAAGGCTATCATAAAAACGAATGTA
Affx-1205096224	CM037938.1	1	71403181	A/C	G/T	R	TTAAATAAGAAGGCCAAACCCAGTTATATAATCTC[A/C]CACCAATACCAAGTATTTCCATCTTAATCAGTAGG
Affx-1205096221	CM037938.1	1	71419721	T/C	A/G	R	ATAACCCAGAATGTCACATGCTCTGTGACATGTTC[C/T]TCATACAGGACGAAGTACATACAGGATCTTTCGCA
Affx-1205096219	CM037938.1	1	71424835	T/C	G/A	R	CGATTTCTTAATTACTCAACTTGCCACAGTCTTAC[C/T]ATTTCCATACTCTAAATGGGCATTTGGGCATAGGA
Affx-98683427	CM037938.1	1	71567307	A/G	G/A	F	AATTATACTTACTTGATGTGTTTGTCGTACATAAT[A/G]GGTAGGAACTCGTCGACGGGCAGCATCTTGGAGAG
Affx-93343475	CM037938.1	1	71626680	A/G	T/C	R	CTGCTTCAATCCTTGAATGTATGTATTGAGACCAA[A/G]AAAGATGCATTTAGCTTGCTGCAATGATGTAACCA
Affx-1205095894	CM037938.1	1	71800554	A/T	A/T	R	TTCTGCTCTCAAGAGCTCATCGTGTGCTTCTACTG[A/T]GTTTATAATGTTTCTAACGCACATATATACATGTT
Affx-1205095156	CM037938.1	1	72104180	T/C	G/A	R	TGTGTTTACACAGGCATTCCAGTTCTGATCTTTTT[C/T]CCACTAATTGGTCTTTTGACCAATCACATCATATA
Affx-1205095155	CM037938.1	1	72120459	A/G	C/T	R	CACTGCTCCTAGCATTCCAAGGGTTCAGGTTCTTA[A/G]AGGGCGGCAGAGGAGTAGGGGTGGGGACCAACCAG
Affx-1205094904	CM037938.1	1	72272043	T/G	A/C	R	GTGGACTGGTCAATGTTAATCTCTACTCAAAAATG[G/T]CACCAAATCACCTGTCTCAATTCTTTCAACACGTT
Affx-1205094902	CM037938.1	1	72279493	A/T	A/T	R	GTACAGGGAGCACCAAGATACTTGCGCGCAGCTTT[A/T]GCTAGTATGGGGAAACGGTGCTTGTTACTTCTCTA
Affx-1205094898	CM037938.1	1	72290426	T/G	C/A	R	TGTGTTGAGGAGTTTATCACTTTATTTTCTAATTT[G/T]GATTATTCTAACATACACCGAACCATGCCGGGTTC
Affx-1205094893	CM037938.1	1	72299170	T/G	A/C	R	TGCAACGTTCCCATTTCTTATGTTCTGAGAACATG[G/T]TAACCACGATCTGGGTGAGTTCAATTTAACAGCAC
Affx-93309180	CM037938.1	1	72313026	A/C	G/T	R	TTGGCAAAAATGGAGCCCGGATAGCGAGGCCAAGA[A/C]ATTCAGTGAACCTATTAGTTTGAAATGAAATAATT
Affx-1205094890	CM037938.1	1	72320992	A/G	C/T	R	TTTGCATGGTCTGCGTATGTATGCACACTTGATGA[A/G]TGAAAACACAATTTAGCTGAAGTCAAATGGCCCAA
Affx-1205094889	CM037938.1	1	72327951	A/C	G/T	R	TAGAATTCACTTTTATGTCATTGTGTTGGGACAGC[A/C]TGTTGGACCTAAGATTGTGTGAAATATAAAGATAA
Affx-1205094887	CM037938.1	1	72355244	C/G	C/G	R	TCGTCGGTCCTTGTCATAGATGGGCTTTTGCAGCA[C/G]ATGACCACACCGGGTTCAACTCTGATCAGCTAAAA
Affx-87970784	CM037938.1	1	72470906	T/C	T/C	F	GAATTTTCCATGACTATTATTGTGGTATGATAATG[C/T]CATTTGCATCTATCTATTTCATTGTTGACTCACTT
Affx-1205094885	CM037938.1	1	72525406	T/C	G/A	R	GGTCCACCACCGAAAAGGACATCCAGCCAACTTGG[C/T]TACTTAGGTAATGAACCACGTGCATTGAATCCACT
Affx-1205094884	CM037938.1	1	72532363	A/C	G/T	R	AGACTGCTCTCTGGTGGTGATTATAGGAACTGCGC[A/C]AATCTACACTGAATATATGGGAGATTCTCTTTTGG
Affx-1205094882	CM037938.1	1	72537824	A/G	C/T	R	CAAGGCTCACAAGGCAGGGCATGGCTTTGGTTAGC[A/G]TTGAGTGACAGAGTGGTGGAATAGAACCAGAAACT
Affx-1205094877	CM037938.1	1	72555020	T/C	A/G	R	AAGAGTGCGTCTGTCTGCAATCGCTCTGCCCCCTG[C/T]GGAGTGATCCAACTCTGTAATAAAGAGCTTATGAC
Affx-1205092805	CM037938.1	1	72598675	A/G	C/T	R	TGGCATTCTCAGTGTTTTACTTTGCAATGGGAGGG[A/G]TTTGACGTTATACTGATGCTGAGGCATCCTTTTTT
Affx-1205092802	CM037938.1	1	72613920	A/G	T/C	R	TAAAGAGGTTGGATTATGCTGACCATTCCCATCTG[A/G]GTCTGACGCTGCTGCTAACCGCTCCTACGTAGTTG
Affx-1205092798	CM037938.1	1	72661289	C/G	G/C	R	CTTTATTATTATATCTTTAGCTCATTTATCAAAGA[C/G]TGTCACTCTGGTTTACACAGCTGTGTCCCTCTTGG
Affx-1205092796	CM037938.1	1	72679035	T/C	G/A	R	GCTTACACAACCTATGGTAGCCTACAAAAACACAA[C/T]CATTAGTCTAAGCATTTCCCACTCGAAATGTACAA
Affx-1205092793	CM037938.1	1	72696493	C/G	G/C	R	CAAGCGGCAAATATGTTCAATTTTAGCTATGGTAT[C/G]AAAGGGATAATTAACTCAGGGCTCTATGCCTTCTC
Affx-1205092791	CM037938.1	1	72774606	A/C	G/T	R	CTTGTGTCCTATGTTAAAGTGGAATGTACATTTGA[A/C]CTTTTGGAATTACTGTAGAGTTTGTCAACATGCCA
Affx-1205092790	CM037938.1	1	72781547	T/C	G/A	R	TGATAACTGGTGGTTTGATTAATAATATAGGAAAG[C/T]TTTCCAGCTTACCTCCATGGTTTTCTTGAACTGTG
Affx-1205092788	CM037938.1	1	72821505	A/C	G/T	R	AGACAATAATACTAATCTTGCCTCGCCGTATTGTT[A/C]TTTTTCCTAAGGAGTGTGGCAGTCGGTAGAGATGA
Affx-1205092785	CM037938.1	1	72841108	T/C	A/G	R	GGAGAAGAGCTGCAACGGCTTGATTTGCCACTTGG[C/T]TTATAAACCCTCTGCTTTACTAAAGCTGCCTGCCA
Affx-1205092783	CM037938.1	1	72850271	T/C	A/G	R	AGGTCTGGTGGTATTTGGGTAGAAAACAGCCAATA[C/T]AGTGAGAAGGTGAGACAGAGAGAGCAAGGGGGATA
Affx-1205092781	CM037938.1	1	72883894	A/G	C/T	R	GGAAGCATGCGGACGCCTTTAGACAGGCGTGCACT[A/G]TGCATTGACTTTATATGGAGGCTGTTTAGAGCCTA
Affx-1205092778	CM037938.1	1	72907147	T/C	G/A	R	GCGAACGAAATGAGGTACATACCTATGGTTAAGCT[C/T]TTTACGAAGGCAAAAGTTGTACAACATTGCACAGG
Affx-1205092777	CM037938.1	1	72930816	C/G	G/C	R	AGCGAGTGACAATGATTTTATGCCTTTAACGAGTT[C/G]ACTTATTTGTCTTAAACTAAATATTGAGAGATTTG
Affx-1205092775	CM037938.1	1	73018817	T/C	A/G	R	TTAGTTGATCAAAGCCTTGAGTATAAACCTATTTT[C/T]GACACAATGGGATGGATAGCCTCAATGCATCAATA
Affx-1205092772	CM037938.1	1	73126261	T/G	C/A	R	TTTGTCTGACAGTAATCTTCTTAAATTGGCCAAAC[G/T]AAAACAGCCAGTGTTCTGCTCTCTGTGTGCTGGGA
Affx-1205092770	CM037938.1	1	73222289	A/T	A/T	R	ATAGGAGAAAGCCCTACCTATAGCCGTTTGCTTAG[A/T]AATTCTAGGGACAATTAGGAGGCCTGCGTCTTGTG
Affx-1205092769	CM037938.1	1	73330561	A/C	T/G	R	TCTTGTTGCTCCCCTCCTACAGGCTGAAATGAAAA[A/C]AGGTCGCACCCGTGCTTAGGTCTATCCAACGCTGA
Affx-1205092768	CM037938.1	1	73492421	T/G	A/C	R	AGATCAACTCAGATGGGAATAGTGAAAAACCAACA[G/T]TGTGCTTACTGCTACAGCCATCAAAGACAGCTTGG
Affx-1205092767	CM037938.1	1	73515958	A/T	A/T	R	AGCACCTCACACCTGCACCAAACTAAATAAGAAAG[A/T]TAAAGATAATCTAGGACATACTACATACACATGTA
Affx-1205092764	CM037938.1	1	73609638	C/G	G/C	R	CGATACTCCAAAAAAATCACCTAAAAGCTAACTCA[C/G]TCAGTGCATAAACATGTAACGTTTCCAGAAATTGT
Affx-1205092762	CM037938.1	1	73967490	C/G	C/G	R	TGGCTTTGAATGATGTCGATTCTAGAATGCAGATT[C/G]GAATATCATTGACTGGGTATCTTGAAGGTCTGTTG
Affx-1205092760	CM037938.1	1	74035795	T/G	A/C	R	AAAAAATCCCGCTGCCAAATGTGAGTCAAATGGTC[G/T]CAAATGCGACCGTTTTGGGCACAGTATCGAACCCT
Affx-1205092755	CM037938.1	1	74105981	C/G	G/C	R	ATAAAGACATACATATATTCATGTGTTTATCATTG[C/G]TTATAGCAGCTACGGCACAGTAGTGTCTATCTGAT
Affx-1205092751	CM037938.1	1	74136520	C/G	C/G	R	TGGACAGTTCATACCAGTGTCAGCTAAGGTATTGG[C/G]AGGAGAGGTGAGATAGGTTGACAGGTGAAAAGGAC
Affx-1205092748	CM037938.1	1	74165862	A/G	T/C	R	AGTCCATGGCTCCGATGCAGCACTGACCCTGCAAG[A/G]CTGCTCGCTAGGCTACCTCCCTCCCTCCTGACTGT
Affx-1205092744	CM037938.1	1	74201989	A/C	T/G	R	CTGCAAATACTCTAATGTTTATTAAACGCAAATTT[A/C]TTTCATTGTGGTCTTTGTCTGTCGTGTCTTGGATA
Affx-1205092743	CM037938.1	1	74208298	A/G	T/C	R	AAGAAGTCCGAGGCCTCACAGAAGGTAAATAACTA[A/G]GGTGGGGTTTGTGTTCAGAGTTTTTCAGTAGGGCA
Affx-1205092742	CM037938.1	1	74410329	T/C	A/G	R	TTCATAATTTCCCTAAAACAGTGTTTCTTTAAAAC[C/T]CATGCAGCAGGTTTCTCTCACACATTTCACAGACT
Affx-1205092741	CM037938.1	1	74426378	C/G	C/G	R	AAATTCCCTAAAACAGTGTTTCTTTAAAACCCATG[C/G]AGCAGGTTTCTCTCGCGCATTTCACAGACTTAGTT
Affx-93280740	CM037938.1	1	74631271	T/C	A/G	R	GGAGGAGCAGAGCTTGCAGTTGTCTGGGCAGGCCT[C/T]GCAGCTCTTCTCCTGGGTATGGTAATGTCCTTCCG
Affx-1205092740	CM037938.1	1	74653702	T/G	C/A	R	TCCTAGACAAAGTGGCATTCAACAACAGTGGAAAT[G/T]AATGCTCGTTTCGAAATGGAATGTCACTTTGTTCG
Affx-1205092739	CM037938.1	1	74686361	T/G	A/C	R	ATAATAAACATGGCAATTTAAACTTATATTCAAAT[G/T]AGATATTGCCAAGAAAACAATGTTTATTGTTGTGC
Affx-1205092738	CM037938.1	1	74691819	T/C	G/A	R	GTGAGTCTCCTCTCTTCCACATTTACTTTTGGTCA[C/T]GGTAGTCTCTACCCTGTTTGAATGTCTCTTAGGTT
Affx-1205092735	CM037938.1	1	74709747	A/T	A/T	R	ATTTGGAACCAAAAAGAGTTTTATTTGACTTGAAA[A/T]TTTTTTTTGATGGTCCTAGAGGGTTCTACATATCA
Affx-1205092733	CM037938.1	1	74748048	C/G	C/G	R	TTATAACAGGAAACATGCATATGTAGTCATTTCAG[C/G]AATAGCGCCCGCAGATATTTAGTATAAAATGTGTG
Affx-1205092730	CM037938.1	1	74768582	C/G	C/G	R	AAGAGTTGTAGCTCAGGCCCCTGCGGCTGTCAGAG[C/G]CTGTCAGACTGTGCCAGCCAGTGAATCAATAGATA
Affx-1205092727	CM037938.1	1	74778036	T/C	A/G	R	GCTGTACTTTGATGTCCAAACTTGTGAAACATAGA[C/T]GTATGATTTGTTAGGATTTGGTCTTGTCTGGACCA
Affx-1205092726	CM037938.1	1	74786220	T/G	A/C	R	CGTATTATATTAAGTTCCGAATTTGTAAAATGTAC[G/T]ATATGTTACGAATTCGCATAACCTATTATGCTAAG
Affx-1205092723	CM037938.1	1	74799201	C/G	G/C	R	GCAATGCCTCTAAACTGTCTTTGCACTAGATTTGA[C/G]ATTTGTTCAATTTTGAAAATCTGAAATGATGTATG
Affx-99003584	CM037938.1	1	74801055	A/G	G/A	F	ATGATCACGGTGGGCTCGTAATCTGCAGGCAGGGG[A/G]CGCAACGACACCATACCGCACAGCGTGTTGTTGGA
Affx-93350163	CM037938.1	1	74819958	A/G	C/T	R	TTTTCTGTCCAGAAGCACATTTCAAGTGTTTGCTG[A/G]GAGTGGTGTTCGTCACGTAATTGTCACCACTTCCA
Affx-1205094036	CM037938.1	1	75222634	T/C	A/G	R	ACTGGTATAGAAAAGAGCTCTTCTTAGGCACCTCG[C/T]CTGTAGAAATAACTCAAAAGAATGAAAGGGCTCCG
Affx-93454615	CM037938.1	1	75246502	T/G	A/C	R	TAACACCAGAAAGACCTCTGATGCCACGCCAGTTC[G/T]TAATATCTTTAAACTTGATGCGCCCTGAGTTTGCG
Affx-1205094034	CM037938.1	1	75278183	T/G	C/A	R	CTACATTTATTACTTTTTGGCTCTGTGATGCGAGC[G/T]AACCATTTAAAGTAGATTAGTTTGTATATTGTGCA
Affx-1205094032	CM037938.1	1	75287203	T/G	C/A	R	AAAGGTTCCATGTAGAAAAGTTGAGTTTATGTCTA[G/T]CCTATACATTTTTGGGGTGACCATGATGCGAGATA
Affx-1205094029	CM037938.1	1	75302847	T/C	A/G	R	AAGGTCAAAGCTGAGGAGTTAGGTAAGATAAAGTA[C/T]TGTATGTAACATGTGTAGCTAAGGCAGTGGGTAAG
Affx-1205179000	CM037938.1	1	75337277	A/G	C/T	R	TAGAGGGAGAGAGAATCGTGCAGCCTTATGTGTTT[A/G]TCTGCCTTTTAGTCTGCCTGGGTACATAGGTAAAG
Affx-1205178999	CM037938.1	1	75373497	A/C	T/G	R	TTTTGCTCCAGTGCACTGGCGTGCGCGAATATCCC[A/C]CAATTTACACCGAAGCGCTTCCACGTCACCAAACC
Affx-1205094026	CM037938.1	1	75389849	A/T	A/T	R	TGCAGTACTGTACAGTAAGAGGAACACGTAACAAC[A/T]CTTTACTGGGGACTTATTCTATATTTCAATAATAA
Affx-1205094025	CM037938.1	1	75405782	T/C	A/G	R	ATGAAAATGAAGCTATTTTATGTCGAATGTGTTGC[C/T]CTGATGTATTTTCTGGAAAGGAAAACTATAGTTGC
Affx-1205094022	CM037938.1	1	75418475	T/G	A/C	R	CTCGTGATAGCAGCTAAGCCTCCACAGTTGGGAAG[G/T]AGCGAGTGAGTGTCAGAGCCAAGACTAGTTACTGT
Affx-99001006	CM037938.1	1	75473644	T/G	G/T	F	ATCCTTGCACAAGAACACAGCAGCAAATATAGAGG[G/T]TCAGTAGGAATTGCCGTGTGTCTTTCACATTTCAA
Affx-1205094205	CM037938.1	1	75510774	A/G	T/C	R	TCTCTATCCACACTGATTGGTGAAGTCATTTAAAT[A/G]TCGAGGTAAATGGAAAAATAAATATCTATATATTT
Affx-1205094204	CM037938.1	1	75550276	A/G	C/T	R	ACACATTTTGAGGACTTAGCTACATTCATCTGAAA[A/G]TCAGTGAGGTATGGTGTCACTATTTAATCTGAGAC
Affx-1205094203	CM037938.1	1	75623717	A/C	G/T	R	AATGCCTTGATTCCATCTGAAATACACAGCGAACT[A/C]ATTTAATACTTTACCCCCCAGATTGGTAAAATGAG
Affx-88085666	CM037938.1	1	75748170	A/G	C/T	R	TCTGTGTGTTTTCCAGTTCTGACATTCAGGTTGCT[A/G]GACCCTGGTGGGCCCCTCCCTGCAGGCCCTAACGT
Affx-1205094202	CM037938.1	1	75797953	A/T	T/A	R	GATAAACAGCAAAGACATTTTTTTCACAGGCCGTT[A/T]TGCTCATATTTGCCAAGGGTGCCAATATTAGTGGA
Affx-1205094201	CM037938.1	1	75857496	C/G	G/C	R	CTCTGGATATTACAGTAGACTGTCCAAGCTGGCTG[C/G]CTGATTGGGTTAACCAGCCTTTGCCGATGGCTGGA
Affx-1205094197	CM037938.1	1	75910309	C/G	G/C	R	CTGTTGCCTTTGCTTGAGCAGCAGTTCTGAAATGC[C/G]GTCAAAGCAATAATGCTAAGTGCTTGTACTAACGT
Affx-1205094195	CM037938.1	1	75924566	A/C	T/G	R	CTGGAGTGGTATTATACAACTGTACTTGGAAGGTC[A/C]TAGATCTTGTTTGTCGATACAAGCTGTTTAATACT
Affx-1205094194	CM037938.1	1	75942592	A/G	C/T	R	ATTTTTGCAAGTATCGACTGGCGCCTCAATGTTGC[A/G]AGCAAATTGCGCGACTAGTAATCAATACTCAACTC
Affx-1205094193	CM037938.1	1	75950691	A/C	T/G	R	TTTTTCAACTTAGGCACACACATGCTCCTTGTGCA[A/C]ATTATTTTTTTTTAAAAGTCAGCCTCGGTGCTGCT
Affx-1205094190	CM037938.1	1	76037826	A/G	C/T	R	GGAAGGTAGTCTCGGAAACCCGATCCTAGGCAACC[A/G]TGACTAGGGTCTGGTTTCAACGACGGACTCTTTTG
Affx-1205094189	CM037938.1	1	76043706	A/G	C/T	R	TCCTGTCCAGCACCCAGCAGAACCAGGAGGAATTG[A/G]CCACGGCCAAACAGCAGCTGGCCAGTGAGGTGGAC
Affx-1205094188	CM037938.1	1	76060158	A/C	T/G	R	TTTGATTATGCTCTGTATTTTGTTGTCAATGTATT[A/C]ATGTAAATGGTTCCATGATTTAATAGCAGACAATG
Affx-1205094187	CM037938.1	1	76068040	A/G	C/T	R	CCTTAAAAGGGTCTCATTAAAATAAATAAAACGAC[A/G]GCAGCATGAACATACATTGCAGACAGTACAGTGAG
Affx-1205094184	CM037938.1	1	76101434	T/G	A/C	R	CAAATTTATCAAGTAGCTATATTGAGGAGAGACTA[G/T]GAAAAAGATTTTCAGCTAACCAATCGGATGAGAGT
Affx-1205094181	CM037938.1	1	76109764	T/G	A/C	R	AATAGCCTGTGTTAGAATAACATTGACTGTGAGTT[G/T]GAGAGAGAGTGGCTAAGCACCCTCCACAAAACTAA
Affx-1205094179	CM037938.1	1	76132986	T/C	A/G	R	AAGAACAACAGTGGTTCAGGTCACGTTTCTTTTTT[C/T]TTTTGCGAAGACAGGCTTGTAGCATACGTAGGTTT
Affx-1205097191	CM037938.1	1	76197421	A/G	A/G	F	TTGTTCCAGCCCAGCTGTAACAATCCTGAATCAAC[A/G]AATCCAGGGTTAAATTATTATTTGCAGCAGGTGTG
Affx-1205097195	CM037938.1	1	76218960	A/C	C/A	F	AAGCTTTCCTTGCCATGATCTCTTCAGGCCATATT[A/C]TCCCCCTTCCTTCACTATGGACTCATTTACATTTG
Affx-1205097197	CM037938.1	1	76288805	A/G	G/A	F	TCTGCCAGACAGACCCTCATCCTTGCATCCCTCCC[A/G]GGCCTCCTATCCTCTCTAAGGCAGAGTTTCTGGAG
Affx-1205179702	CM037938.1	1	76357480	A/G	G/A	F	TAATCAGGGAGGTAGAGGAGAAGCTGTCGGGTGAT[A/G]ACACCGCATTCCTGCAAAGCTACAAGACCGCGAAG
Affx-93316772	CM037938.1	1	76394578	A/C	C/A	F	TGGCCCAGCGTTCAGCATTCCTTGCGTGTACAATT[A/C]GTTAAAAACCGTCTTTGTTCAGCTGTCCTTTGTTT
Affx-99006083	CM037938.1	1	76464598	T/C	C/T	F	ATGTTGAGATTACAGAAGACAGGGACAGCGAAAGA[C/T]GTGTCCTGAGAAAAGATACTACTGGACAGTGTCAG
Affx-88079577	CM037938.1	1	76556596	T/C	G/A	R	AAAGACTCCTTCCTTCCCATCCCAGGTGGCTCAAA[C/T]GTGTTTTGATGATAGCTTTTAGCATCCAACCAAAC
Affx-1205092442	CM037938.1	1	76559350	T/C	G/A	R	GACAATCTGTATGTCTGCATCCCCTGTGGGAAAGG[C/T]TTCCCCAGCTCCGAGCAGCTTAACGCCCACGTCGA
Affx-98657848	CM037938.1	1	76582425	T/C	G/A	R	GACATATCACCAACACTCTAAAATAACTTCCTCTA[C/T]TTGTCTCAATCAATCAATCAATATGTACCTGTAAA
Affx-98686042	CM037938.1	1	76583889	A/C	T/G	R	TGTGTAGAGTGATTCATGAAACAGTGACTAGACCT[A/C]GACAGATCTATATAGACCTCTCTTTTATAAGACAG
Affx-1205092440	CM037938.1	1	76588662	T/C	A/G	R	GGCGAACAGTGATATCTCACCAAGGAGCTATAGGA[C/T]GTCAGGTAGCCTAGCGGTTAGAGCGTTTGGGCCAG
Affx-1205092439	CM037938.1	1	76698485	C/G	G/C	R	CAAGGCTACGATACAAAGCCTATTAATGATAATCA[C/G]TTATTATTAGAACGATGATCATAATAACAATATGA
Affx-1205092438	CM037938.1	1	76731037	T/C	G/A	R	TGTCCAAAGAAAAACATTACTGCATGCCTGAAGTT[C/T]GCAAAAGAGCATCTGGATGTTTCACAGCGCTACTG
Affx-1205092435	CM037938.1	1	76764366	A/C	T/G	R	CATCTTCCCACCCTTGAGTTGTCTCAAAGGCAGGA[A/C]GGCAGGCGACAAGCTTAGGTGCAAGATAAGGCCAT
Affx-1205092433	CM037938.1	1	76810207	A/G	C/T	R	GCTGAGTCGCAGTTAAAGTAGGAGCAGAAATCGAG[A/G]TTGAAGTCGAGGTTAGTAGCTGTCGATTCATAGTT
Affx-1205092432	CM037938.1	1	76834067	A/G	C/T	R	ATAATCCAGACGTAGTGGTCACTCACTCCCGGCAA[A/G]CTCTCCAAATATAGGGTGGTCCTATACATGGGGTG
Affx-1205092431	CM037938.1	1	76839639	A/G	T/C	R	TGTCAACAAAAACTATATAGCATCAAAACATGGTT[A/G]AAACTAGAATTTTGCTATCATGGATGATCAGTCCT
Affx-1205092430	CM037938.1	1	76847838	A/T	T/A	R	CAGGCCAGTAGTTCTCTGCTGAAGCCATGTTTCTG[A/T]GGAGGACAGGGAGAGAGAGAAATAACACATCAAAT
Affx-1205092428	CM037938.1	1	76871795	A/T	T/A	R	AGCGAGCCTGGGGCAGTGGGTCTGTAGATTATTTT[A/T]TTTTTTTTAAACTGTAGGCAATAACTTGACAAATA
Affx-1205092427	CM037938.1	1	76876999	T/G	C/A	R	GAACACTGAAGCAAAAATGACCTTGTTTAGGAAAC[G/T]TTCTGTAGTGTAGCAACACTAAGTACATTCATTCG
Affx-1205092422	CM037938.1	1	76909584	A/G	T/C	R	GAAGCCCAAATGGGATGAGTTCAAACAGCAGAAAA[A/G]GGAGCTGAAACAGAACCGGCAGCAGACTGAAAAAA
Affx-1205092416	CM037938.1	1	77106574	T/G	C/A	R	AATCACTTGGAAGTACCACTGTCACGTTAGTGAGA[G/T]GACTTTGCTTCCTCCCTCTCTGTCATCTTTCCTGT
Affx-1205092415	CM037938.1	1	77130394	T/G	A/C	R	TCAGATGGATTCCAAGAGGCTATTCCAATGCATTT[G/T]ATTTAAAAAGCTAAAGAAGGGTTCCATGCAATACA
Affx-1205092413	CM037938.1	1	77207224	A/T	A/T	R	GACTTGCCTAGTTAAATAAAGGTAAAATAAAAAAT[A/T]GCTCAGAACATGCTCTACTCCTATACAGTCTATTG
Affx-1205092412	CM037938.1	1	77321891	T/G	C/A	R	ACCTGATTTAAACAGGGCTTTAGTGTCATATTAAT[G/T]ACATTATACATACATATGGAAACATTTCAGAAGTT
Affx-87901182	CM037938.1	1	77344450	T/C	C/T	F	GGAGCAGTAACATGAAATCCATGGATGAGAAAAAG[C/T]AGACAGTAATTACATAGAAACAATGAATGACTTTT
Affx-1205092411	CM037938.1	1	77380878	T/G	A/C	R	AACACAACAAAATTGGGGAGAAAAAAAAAAGTTTA[G/T]AAAAAGCGAGACATGCTGCTCACAATATTCTAGAC
Affx-1205092410	CM037938.1	1	77470754	T/G	A/C	R	GCGGGATGTGTCTAATTGGCTGCTACATCCTGTCC[G/T]TTTACACTTAGAATTAGAAGCAACATGTTTGGGAT
Affx-1205092409	CM037938.1	1	77551164	A/C	T/G	R	GGAGGATGATGACGTTAATGATGAGTATTGTGATG[A/C]CGAGGACGACAATGACGATAGTATTTCTGACTGTG
Affx-1205092408	CM037938.1	1	77562931	A/G	C/T	R	CGGATGAAGCCATTGTGTTATAGCTTCGTTCTGAA[A/G]GTAGGTAAGGAGTCAAGCGCAGGAGAGCAGAGATG
Affx-1205092407	CM037938.1	1	77568811	T/C	A/G	R	GGAGCCCTGTACGTCTTGACAGTCAGTCAGGATTA[C/T]AAATGAGGGCAATTCGTTGTGAAAATGGACTGCGG
Affx-88124110	CM037938.1	1	77636183	C/G	C/G	F	ACGCGACCCCACTCCTCCTGTGTCTTAGTCGCAAA[C/G]TGCTTAGTGAAGATCTGCCTCAACACTGGCCAATC
Affx-1205092405	CM037938.1	1	77637329	T/C	G/A	R	GCAAACAACACTCACACCATTCTTTTTCATGCAAC[C/T]GTCTTGCAGCTGTGAAAATCCATTTTAAAAACTGG
Affx-1205092403	CM037938.1	1	77667038	A/G	C/T	R	AACACAGCTGTGAGGGATCAGACTGACTGCCAATA[A/G]ATACTTACCACAGTAGGAGGTAATTCCTTCTCTTG
Affx-1205178694	CM037938.1	1	77716319	T/G	A/C	R	CACTGTGAGCACTGACCAGTGTTAGAATTTTTTTT[G/T]GTTTATGGTATTCACATTTCTATTAAGTGGTCTTA
Affx-1205178693	CM037938.1	1	77744134	A/G	C/T	R	TTTATTGTGTGACGATTACTTTTTTATTTAGCTTG[A/G]TGTGTTAATATTGTTTAGTGGTGTATCATTGTTTA
Affx-1205178692	CM037938.1	1	77744160	T/G	A/C	R	TCTTTGTAAAATGTTGCTGCAGTGGATTTATTGTG[G/T]GACGATTACTTTTTTATTTAGCTTGGTGTGTTAAT
Affx-1205092402	CM037938.1	1	77756501	A/G	T/C	R	GATTCTCCATCTGTAAAGGCTAGGGAGATAAATGT[A/G]AATGTTTTATGTAAATCCATACGACAAATGTAGTT
Affx-98988767	CM037938.1	1	77759637	A/C	C/A	F	CTAACCAGCCTCCCCTTCCTGGCTTTGGGGACCGT[A/C]TGAGTCAGGATCAAAGGCAGTGTTGTGGTGATGTC
Affx-1205092401	CM037938.1	1	77769428	T/C	G/A	R	TAGACACCACAAAAAGTCCCCAGTATAAAGCCTGA[C/T]GCAAAACCGATCTATTGGAATCTTCAATGCGGTTA
Affx-88066611	CM037938.1	1	77825839	A/C	G/T	R	GCAACGGGCAGCTAATGGCTTTTTCATTGTAATCC[A/C]CCCAAACGGAGCAAAGCACGTTGGGCCTGGAGAGC
Affx-1205092400	CM037938.1	1	77963956	T/C	G/A	R	AAACGATGAAACAAGCACCTAGACCACCATGCGAC[C/T]AGGATAACAAGGAGGGGTCGGTCTGCAAAGCCATG
Affx-93289773	CM037938.1	1	78028068	T/G	T/G	F	TAGTGGCCTGATTAAATAAGCATTTGGACGTTAGA[G/T]GAAAATGTCTGAATGTATTTATCAAATCAAATGTT
Affx-88032003	CM037938.1	1	78033326	A/C	G/T	R	TGGCCAAGCATTCCACATCCCAAACACACACTTCT[A/C]CAGATCGTCCAGACCTACGAGCCAATGAAGGTACA
Affx-98668166	CM037938.1	1	78054053	T/C	G/A	R	GTCATACAGATTGTGAAAATCCTCAACCTCTACAC[C/T]CCGCTCAACGAGTTTGAGGAAAGAGTCACTGTGTC
Affx-1205092395	CM037938.1	1	78057204	T/G	C/A	R	GGTACCAGAATGCTACAAGTTAGGCGTTTGGGAAG[G/T]TTCAGTCAGCTTTAGGCTTATTGTAACCATCCCCT
Affx-1205092394	CM037938.1	1	78065801	A/C	G/T	R	GAAGATGATTGCATATGATTTTGAGCATTACTGTT[A/C]CATATGCAAATAGTTAGATGTTAAAAGTTTCCTTG
Affx-1205092393	CM037938.1	1	78080718	A/C	G/T	R	GAGAGAGAACGTCATTAGATCGCTACCACAATGAT[A/C]CAATCATCAGAACGATTCTAGTGGACACTTCAACT
Affx-87855318	CM037938.1	1	78086209	T/C	T/C	F	AGATAATTGTCAGACTCAAGTTACGAATCCCCCCC[C/T]GCTGTATGTCTTATTATTTGGGCTTTCTACTGTAG
Affx-1205092390	CM037938.1	1	78092495	T/C	G/A	R	TTTTATTTACCTGCTTAGATGGGTTCTAGTGAAAA[C/T]GTTATCATGTTTTACTTTTTCTATGCCCTGAAAGT
Affx-1205092388	CM037938.1	1	78101705	A/G	C/T	R	CATCATATTATTTCAAGTTATCCCTTTGGAGCGCA[A/G]TATCACGTTGTCGAAAAAGATGCCTAAATTGGCCA
Affx-1205092385	CM037938.1	1	78115435	A/C	T/G	R	CAGCGAGAGGTTGAAAATGTCAGTGAAGACACTTT[A/C]CATTTTCGCTGGCATGCTCTAAGTACTCGTCCTGG
Affx-1205092384	CM037938.1	1	78128138	A/G	C/T	R	ACCTTGAAGATTTGTGTACGCCACTGGAATGACTC[A/G]GTTCAGGAAGAAACCTAGCCCAATGAAAGACACTA
Affx-1205092383	CM037938.1	1	78134710	A/C	T/G	R	ATACTTTCGTAATTCAGACAACGTACACAAAAGCT[A/C]ATCTCTAAAAATCATACACCCACACGCCTAACCCT
Affx-1205092382	CM037938.1	1	78145027	A/C	G/T	R	TTACAAGTTCCAGTGTCACATAGAAGACAGCTCTC[A/C]TCTCCAGGAGTAGAGCCTCTGGGCAGCCCTATTTC
Affx-1205092380	CM037938.1	1	78152123	A/C	T/G	R	ACCAACCAGTCTATGGGCAAACCCAACAACTATCC[A/C]GACCAGAAACTACTGAGGCTGACTGTAAACCAACA
Affx-98664373	CM037938.1	1	78162033	A/G	G/A	F	AATTTAGAGTAGTGATCAAACATGCACATTGGACT[A/G]CAACTATAGAATTCTCCACTTGCAGAGGACTTATG
Affx-93419582	CM037938.1	1	78162848	A/C	A/C	F	AATGAAATCAGTGTTCTTTCTTATTGCACATGTTC[A/C]GGCAGGCCCTGCTCTCCACTTAAAGATGTTTGCTC
Affx-98675981	CM037938.1	1	78162894	A/G	A/G	F	GCTCTCCACTTAAAGATGTTTGCTCCAGTTTCATT[A/G]TTCTCCAGTTTTACCGGAATGAGGACAAGCAGACA
Affx-1205178691	CM037938.1	1	78212589	T/G	C/A	R	CTGAGTCTCAAATAGCTGCATGTATTTGGTTTCTT[G/T]GAGCTGCTTAGAGTAAATAAGTATGATCAAACTGA
Affx-1205092376	CM037938.1	1	78264264	T/G	A/C	R	TGGGCAGTGTGCCTCTTTTCTGGGCCGTGACCTCT[G/T]ACCCCACCACCCTCCAAACCACTTACGGTATTGTG
Affx-1205092375	CM037938.1	1	78282921	A/G	C/T	R	TTTTTATTTCACTTTTTATCCCAGCATTGCCGCGC[A/G]ACGTGGAATAGGCTATATAGGATTTGTAGTTCTTT
Affx-1205092371	CM037938.1	1	78320100	A/G	C/T	R	GCGCTCAGAGACAACACTAGTTCACCTTACTGCAG[A/G]GATCATCAACTAGGTTCAGCCGTGGGCCGATTTTT
Affx-98681725	CM037938.1	1	78322938	A/G	G/A	F	GGAGTCTCTTGGATATAATTTATTCGGTTGAAAGC[A/G]AAGCATGCAGTATATGTGGCCTACATGCAGGGGAG
Affx-1205092369	CM037938.1	1	78338904	T/C	A/G	R	GTGTTGTGACAAAACTGCACATTTTAGTGGCCTTT[C/T]ATTGTCCACCTTTATTGTCCACCTGTGTAATGATT
Affx-1205092368	CM037938.1	1	78350631	C/G	C/G	R	GCTACTTCATAGGCCTATATACAGTATATGCAATT[C/G]AAATATGTGGACTTGGCCTAGGCCTACTTCACATA
Affx-1205092367	CM037938.1	1	78360005	T/G	C/A	R	GAAACATACGTGTACATATTACATCATCGTATCCA[G/T]GGATCGATGCGGGCATAAAAGAAACTGTTTGTTTG
Affx-87935545	CM037938.1	1	78373797	T/C	C/T	F	AGAGGGCATGCATTTTCTCCCTCCCCTGCATGATT[C/T]GTCTATCGTAATGAGCTTGTGACAAGTATTAAATG
Affx-93377254	CM037938.1	1	78377444	A/G	A/G	F	TTATTCATCAGACTATTTGAGTCATCTAACGTCAT[A/G]CGTATTTACATCATATTCATAGTTGTGCAAGATAA
Affx-1205092365	CM037938.1	1	78407811	A/T	T/A	R	TTTATCACAAGGAAGTATTTGGTGTCTTGAAAAAA[A/T]GTGTAATCACATTATCAGTCTTTTGTCACTTTGGT
Affx-1205092364	CM037938.1	1	78443635	A/C	G/T	R	TAACAGCTAGCTACAGTAGTAGGCTCGCTTAAAAT[A/C]AAAAAATGACGTGCCCGTGTGGTTAAGTTGTAGCT
Affx-1205092362	CM037938.1	1	78465041	T/C	A/G	R	TCACACACACGTCTGCACTATTTCCCACTGTCATG[C/T]GCTGTGTTTTCTCTGCTCTCCTCCGCCCCCGGGCC
Affx-1205092361	CM037938.1	1	78472910	A/G	T/C	R	CCCTTCGAGGACCGGCCCAGTTTCCCCAGGGCTGC[A/G]CGGCAGTTCCTGCTCAAGTGGTCCTTCTACAGGTC
Affx-1205092359	CM037938.1	1	78489404	A/T	T/A	R	GTACAACATGTACGTTGTATATTCGCAAATTGTTT[A/T]AAAAAAAAAACTCTGATGCTCGCGGTCTTGTCAAA
Affx-1205092356	CM037938.1	1	78536527	A/T	A/T	R	ACACAGCAGAACAACTAGTGTTAGTCTTCTAAGCT[A/T]TTTGAGTTCACCACAGAAGTTTGTTCAGCTTTGAC
Affx-1205092355	CM037938.1	1	78546537	C/G	G/C	R	TAAGGAGAAATGTCTGTATTTTTTTTATTTGTAAA[C/G]TATATGGTCTAATTCAAGCAAACCATGTCAAGTGA
Affx-1205092354	CM037938.1	1	78693401	A/C	G/T	R	CAAAGGGGTTGAATACTTATTGACTCAAGACATTT[A/C]AGTGTTTCATTTTTTAGTAAATTTGTAAAAATTTG
Affx-1205092353	CM037938.1	1	78709820	T/C	A/G	R	CGGCTTACCCTGTGTCAGCCTAAAAACCTGGGAAC[C/T]GCAAAGCTTTGTGTGTCACCAGTGAATTATCGGTT
Affx-1205092352	CM037938.1	1	78722260	A/T	T/A	R	TAGATGTAAGAGACATGAGAGAAGTGTGTTTCAAA[A/T]GTTCAGCATGAAACTATCTATAGCATGCCTCAGGG
Affx-1205092351	CM037938.1	1	78733095	T/C	G/A	R	CTCATCAACATTTCTACTTCTATATTACTAGTGAA[C/T]GCCCATCAATACTTCTACTTCTACATTACTAGTGT
Affx-1205092348	CM037938.1	1	78759946	A/C	G/T	R	GGACGAAGCGGGAAAGGGCATATTGTCCAGCCATT[A/C]CACACGGTGGCAATCTGAGTGGAATGGATGGTGAT
Affx-1205092347	CM037938.1	1	78773426	A/T	A/T	R	GGGGAGAGAGAGAGATGGGGGAGAGAGAGAGAGGG[A/T]TAGAGAGACGCTACACCGCTACAGCAAACTGGAAG
Affx-88034381	CM037938.1	1	78848306	A/G	A/G	F	ACAGTGGGATTAAGTCAAACTAAGAAATCCTTTTC[A/G]ACATGAATACAATTAACTTTAAACTGAATAAGTAT
Affx-1205092346	CM037938.1	1	78864790	A/T	A/T	R	GGACACATTTTAACAACTTCCACTTAAAATGTAAC[A/T]AAAACACATTAACTTGAGGAACAGTGCAGGGGCCA
Affx-1205178690	CM037938.1	1	78870266	A/C	T/G	R	CGGCCCACAATGCTCTGCTTCAAAATGTCTGATAT[A/C]ATTTTTAGATGTGAAGTAGACTGACGTGATCTTTG
Affx-1205092345	CM037938.1	1	78873922	A/T	A/T	R	TCAATAAGCAACATTGTAAATAACCTGTACAGATG[A/T]AGTATCTTAATTTGAGCCAGTTTGCAACAGCAGGA
Affx-1205092344	CM037938.1	1	78887452	T/C	G/A	R	TTGAAGGGTGAGGGACAGGGGATGATGTATGACAG[C/T]GTGGCAGCTCAGCGGTGCGTTGGTGATCCCCACAA
Affx-1205092343	CM037938.1	1	78894679	T/G	A/C	R	AGATCTGATAACATTCATTATAAAACATATGTGTT[G/T]TCTTGCCTAGTGCTTAGGGTCGTTGTCCTGTTGGA
Affx-1205092342	CM037938.1	1	78983412	T/G	A/C	R	AGCAAGGTGTTTCGGAATGAACACGACTTTGAAAT[G/T]AATCAAATCACGAAAGTAACATTTCACTGACTCTC
Affx-1205092340	CM037938.1	1	79001728	A/T	T/A	R	ACTTCCCCTGAATAGTCTGTTTGTTTGCAGCAGTA[A/T]GGACAACAGGACCACCCTCCTCTTCCTGAGGCGAT
Affx-1205178689	CM037938.1	1	79069492	A/C	T/G	R	ACAGTACGACTGTTATGAGGGTATGACTCTCTTTT[A/C]CAGCAATAAGGTTGAGCTATAAATCCATTCCTTTA
Affx-1205092339	CM037938.1	1	79076266	T/C	G/A	R	GGAGTTCTTCAAAATATTATATAGTTGAGAAGTCA[C/T]CACTAATTATTAGGATGGTAAAAATGTAATTCACA
Affx-1205092338	CM037938.1	1	79086073	T/C	A/G	R	ACTGACCAAGGCACAGACAGGCATGGACTGACGCA[C/T]GACTGACCATCCACTGACATACTGAACAAACACAG
Affx-87861658	CM037938.1	1	79136895	T/G	T/G	F	CTGTTTTAGATTCAGTAGTTACTATATCAGCTAAC[G/T]GTTCATTACTGCGAAGTTTGTTGGCCAGTAAACGA
Affx-1205092335	CM037938.1	1	79179664	T/G	A/C	R	CCAGGACTCAGCCAGCAGAGACTTCCTGTCAATCA[G/T]TCTGCTGGGAGGTTACTTGGAGTTCAGCTTCGACT
Affx-1205178688	CM037938.1	1	79182203	A/G	T/C	R	CCACACCCATTCCTGCCAACCACACCCTTACCACC[A/G]ACCCAGTTGCCCTCACCTCGTCTCCAGGCCTGGAT
Affx-1205092333	CM037938.1	1	79185206	T/C	G/A	R	TATATTGAATACGTTATATTTCCAAGTTATTCTTT[C/T]GACAATTTTTCTCTGAAAATCCTTTATTTTTACCC
Affx-1205092329	CM037938.1	1	79193658	T/C	A/G	R	TAACGGTAGGTCACAGGCAAACAATAAGATATCCT[C/T]GTGATCTGTGGAGTTCCGGCTTTCGGTGTGTATCA
Affx-1205093489	CM037938.1	1	79326236	A/G	G/A	F	CTCTGGTAAAAGCTGGTACCAAGAGGATGCATGAC[A/G]AGACACACAGTACTGACTGCCCTCCACATGCGCCC
Affx-1205093493	CM037938.1	1	79347001	A/C	C/A	F	GCGCAGGAAATGGCAGTTACAGGTGTTCAAAAACG[A/C]AAACATCTCTGACATCTCTGGGCACCCCCCAAGCC
Affx-1205093500	CM037938.1	1	79362800	A/C	A/C	F	ATCATTCTTTTGACTGCAGTTTTGTATGGAAAAAT[A/C]ATTTGTAATGTATTTTACAGACAGTGCCATTTCTT
Affx-1205093502	CM037938.1	1	79386687	A/T	A/T	F	AGTGGTCACATCTCCTTCCCATCTGAGGTTTAGCA[A/T]TAAAAGAGAGACATCATGGCAAATTAACAACTTAC
Affx-1205093507	CM037938.1	1	79398288	A/C	A/C	F	TGGTGATATCACATTAGTTGACTTTTACATTTGAT[A/C]ATTTTAATTCAATGATTTCGAGAAATGAAAATATT
Affx-1205093509	CM037938.1	1	79404107	C/G	C/G	F	TTCCATTAATTGTCCAAACCATAGTCTTCGACACT[C/G]CAAGGTTAATCCGTATGAGATCATGCATCAATATT
Affx-1205093513	CM037938.1	1	79411935	A/G	A/G	F	TTTACACTTCTTACCTTATTGTATGCCTCTTTCAC[A/G]CATACTTGCACGCTCTGCCATTTTAACTCTAAACA
Affx-1205093516	CM037938.1	1	79421340	A/C	C/A	F	ATTCCCCCGCCCAAACTGCAGCGGCACCATACAAC[A/C]TTTTCTGTAACAACAGACACGGGCAGCAGAAGAGC
Affx-1205093517	CM037938.1	1	79434516	A/G	A/G	F	TTTTGACAGGGCCTTGATAAAGTCTGACTTGTAGG[A/G]TGCTGCAAGCAATGCCGCCTGGAGTGGACAGGGAG
Affx-1205093519	CM037938.1	1	79440447	T/G	G/T	F	TACTCTTTGATAAAATTATCAATAAAGAAAAAAAA[G/T]AATGGAACATGAAAATCGGAAGGATATATGACAGA
Affx-1205093522	CM037938.1	1	79447800	A/C	C/A	F	AAAAAAAAAGCCCAAATGCCAACGTAATTCAAGAA[A/C]CACCCATATTTTCCCCCGTAGACTATATCATGTAG
Affx-87931176	CM037938.1	1	79453305	T/C	C/T	F	AAGAACAGCAGCAGCAAAGTGGTGCATGCAGCCAG[C/T]CATACCATGCGGAGAGGAGAGGCAGTGAGGTACAG
Affx-1205093525	CM037938.1	1	79453365	A/G	G/A	F	GTGAGGTACAGCAGCAGTTGAAGGATAGAGTATGA[A/G]GTGGTGGTACAGGAGGAGCGGAAGTGAAAAAGCAG
Affx-1205093528	CM037938.1	1	79460550	T/C	C/T	F	CGTCTTTAGTATTATGCCCAAAAAATATGAAAGGG[C/T]GTGCACACATAGGTCCCGCACACACTATCAAAAAA
Affx-1205093530	CM037938.1	1	79467438	A/G	A/G	F	ATGCTAGTATCTACTGTAGCTACAACGACGAGGTC[A/G]GAGAATTTGATAAGGTAAAATGCTAACTGTCTAGC
Affx-1205093531	CM037938.1	1	79492112	A/T	A/T	F	GTCTAGCTATATTAGAGGACATAACACAGATACAA[A/T]AGAGAACTACCAATGGGTAAAACAAAAATGAATGA
Affx-1205093534	CM037938.1	1	79498042	T/C	C/T	F	ATAGAAAGATTTGTATATCTACAGGTGTCAAAACA[C/T]TACTTACCGGGTCATTCCACGAAAAGAGTGTCTTT
Affx-1205093536	CM037938.1	1	79838724	C/G	C/G	F	AATAAAATAAATTCTGTCAAGTAGTAACATTTACT[C/G]TAGTCATGTTCCTGCGTTACAAAGTGTTCTCCAGC
Affx-1205093539	CM037938.1	1	79853578	T/G	G/T	F	CTATTTGCCATGACTGAAATGTGATCATAACATTA[G/T]TTTGGATGGAAGGAGTTCAATTACGTTAGTTTCTA
Affx-87915134	CM037938.1	1	79878665	T/C	C/T	F	TTGGTCCCTTTTGTATTGGCATTGAGTATTCATTT[C/T]GGAAGCAGTTTATCGTTTAAGAACCAAACGGAAGC
Affx-1205093540	CM037938.1	1	79879086	T/C	T/C	F	ATTTTGACAGGAGGTAAGCAGAGGACTTTTGTCTA[C/T]AACAGACCCACGTTTGGAAAGTTGTTTAATAAGTT
Affx-1205093541	CM037938.1	1	79900566	A/G	G/A	F	TTAAATCTCTGAGTGTGTATTTGAATCAAACAGCA[A/G]AGAGACTGAAGTTTTGCATATTTGATGCCAACTGT
Affx-1205093547	CM037938.1	1	79915634	C/G	G/C	F	CAAATATTATCCAATTAACAACGTTGAAATGACGT[C/G]GTGTGCCCAGTGGGATGCTCATCCATTTCATGAGA
Affx-93373503	CM037938.1	1	79924332	T/G	G/T	F	CCCAAAAGCCTCTACCGGTAGCCTATTGAAGAGAT[G/T]TTCGTCTGTAACGTTCTCCTTGAAAATAAAACAAG
Affx-1205093550	CM037938.1	1	80006062	C/G	C/G	F	TATATGACTGGGTTACATTACAGAGGACTGCAGAG[C/G]AAGTGATATGAATGCAGCTCATGTAATAAAGCGTT
Affx-87918131	CM037938.1	1	80054642	C/G	G/C	F	GGGATGCATTTTTTTCATTGTTTTTGACGGTAGGA[C/G]ACTCTGGTAGACCAAAATTATGATCAAAATAGCCA
Affx-93415328	CM037938.1	1	80055522	T/C	T/C	F	CGGACTTTGATGTGTGGACTTACTCACCTACACAT[C/T]ATTGCTTTACTCAATATGAATAACATGAATCCTGG
Affx-1205093554	CM037938.1	1	80092337	T/G	G/T	F	GCATTTATATTTTTGTTCTGTGTAGATATGTATTA[G/T]ATTTCCAGTAAATTCATACACTGTCACAGAAACAT
Affx-87862585	CM037938.1	1	80117831	T/C	C/T	F	GGCTATCGATAAAAGGGCCAAGGTATGTCCGATAT[C/T]GCGCGGATGCTCTCTGCTTCTGTCTGTACAGAGAG
Affx-1205093557	CM037938.1	1	80130805	T/G	G/T	F	AAAATGACCCAGGCCTGGATTTGAATACGAGGCCT[G/T]TATAGTTGTATAATGATTGTTGTAGTGAGTGCTGT
Affx-1205093560	CM037938.1	1	80164810	T/G	T/G	F	CATGGTAGTAGGCTATAAGTGCAAATGTTCCATTT[G/T]CAGAAAACATGTAGGTCTATGGTCTAGGCTACATG
Affx-98673638	CM037938.1	1	80167939	T/C	C/T	F	AGATGGCCATTCTTTGCTCTGTAAATCATGGTCTC[C/T]TGGCCACTCTTGAAGTCAACAAACCCCTCTCTGCC
Affx-1205093562	CM037938.1	1	80176644	T/C	C/T	F	TTTTCATATGTCCTGTTCCACTGTGTCCTGTTTTC[C/T]TTGTAGTTATCTGCATCTGTCAGGTATGACGCCGT
Affx-1205093563	CM037938.1	1	80185852	T/C	T/C	F	GTTTACACAGTTGTTTACATTTCATGTAGCTAGGC[C/T]ATCTCTAATATCTAGCTAGCACAGTGACGTAACGT
Affx-1205093564	CM037938.1	1	80197387	A/T	A/T	F	TTACCTGATGCTCTTGAACCCATGGATTTATGAAA[A/T]TATGCTATTCAAACTAAATACTGAACCATACAAAG
Affx-88083951	CM037938.1	1	80201455	T/C	C/T	F	TTTTGATAGTCTTAAGGAGAAACTCCTGCACCGGC[C/T]TAACGATCAAACATGGTAAACAGTCCTGCAAGCCT
Affx-1205093565	CM037938.1	1	80255840	T/C	C/T	F	GTAGTATGTCCTTTACCCTAACGCTTTATTTTATT[C/T]GTTTCTCCTTCACAATTCAACCCTTGGTCTTTGCC
Affx-93323912	CM037938.1	1	80289539	A/C	C/A	F	CATTTTTCACTCCTGAAAATAAGGTTTACTTTGTA[A/C]CAATCCCCCGATCAGTGCCCTTAAAATGTGCGTTA
Affx-1205093571	CM037938.1	1	80307006	A/T	T/A	F	TGAGGCGTATACACGCTCGTAAAAAAATAAATAAA[A/T]AAATAAATCACTAATTTTGGCTTCAATGTTCAGAC
Affx-1205093572	CM037938.1	1	80331575	A/T	T/A	F	AGCAAAATTAGAAGATCATCTATTAAAATAAAAAA[A/T]GTTATTTTTTGTACCTCTATGATACGACCAAAAAT
Affx-1205093573	CM037938.1	1	80357957	C/G	C/G	F	TCTCCCTGCTTGGTGTTTCGGCAAATGCATGTTAA[C/G]TCTTCGGCCATTGTTGGAACGAGGAATCGTTAAAA
Affx-99005962	CM037938.1	1	80370696	A/G	G/A	F	TCTCTATCCTCAGTGCATCATTTCAACCTTGGGCG[A/G]CGAGTCCCAGGCTTTGACTATGGCCCAGATGCTTT
Affx-1205093575	CM037938.1	1	80389670	T/C	T/C	F	TCCTCGTCCATCCTGGACCCGTCTTCTGGAAGCTC[C/T]GCTATGTCCTCCAGCTCATCGTCCACAGGCGTGGA
Affx-93272580	CM037938.1	1	80398626	A/G	G/A	F	CCCATCACAATTTGCAAGTTACAATTTGCAAGAAC[A/G]TGGTAAAGGGGCTGTATGAAAGGAGGTTATATAAA
Affx-1205093577	CM037938.1	1	80407004	A/G	G/A	F	TTTTAGTCAACTTTAGAGGAGCTGGGTTTTCCAGG[A/G]AGGGTTCAATATGCATTGCACAATTGCTGCGTAAT
Affx-98666801	CM037938.1	1	80412959	A/T	A/T	R	CATGTAGCGAGGGGAGTCAAAAGAAAGTACACCAC[A/T]ATATCAAAGTCAATCATTTACAGTCATTCATCAAA
Affx-1205097155	CM037938.1	1	80525333	A/G	G/A	F	ACAACAGCGTTCCAAAACAAGGACTCATTTGTAAA[A/G]GTGGTAAATGACCTTTTAATGGCGTCAGACCAAAG
Affx-1205097157	CM037938.1	1	80536046	A/C	C/A	F	GTTGATATGAAGTTAGGGTTGAGGCTAGGTTTAGG[A/C]TTGAGCTGGGAGTTGATATGAAGTTAGGGTTAGAG
Affx-98989637	CM037938.1	1	80675112	T/G	T/G	F	GTGAAAGTGGGAACAGCATGTGCTGCAGAGCTACA[G/T]TTTATGACTCTAACAATCATTTCCCACCAACAAGA
Affx-98670216	CM037938.1	1	80684590	T/G	T/G	F	TACTCTACTATACCTGCCAATCTCTGAGCAAAGTT[G/T]AGAATCCGCAGAAACCGCCGCGTTCTTGAAGGTGT
Affx-1205097162	CM037938.1	1	80698492	A/C	A/C	F	CAGAACAGCAGTGGGTCTGTGTCCGACCTGGAACT[A/C]TCACCAGTGACCTTCTGCCTTGCTTCTTAGCCACG
Affx-1205097163	CM037938.1	1	80748364	A/G	A/G	F	CAGCTGCATGTGTGTGAACAAGGGTCATCCCTGTC[A/G]CACCCCTCAGGACTACAGGCTCTCTGCTGACCCTA
Affx-93363081	CM037938.1	1	80774913	A/C	A/C	F	CCTTTTTAAATGGGTGATCTCCGTAGTTGTAATAG[A/C]CTATTTAAGACAATGGAGCACCACAATGTCACTAC
Affx-98997964	CM037938.1	1	80801587	T/C	T/C	F	AGTTCGATTTTTCTTAGTATTAATGTTTTGATTTT[C/T]TTGCGATGAGTATGATATGAAGGTTAAATCCAGCG
Affx-99000078	CM037938.1	1	80860490	T/C	T/C	F	AGCAAATGGTCCTGTTGCTACATTACCTAAATCAG[C/T]CCTGTAGAGAATAACAATGTGGTGAGCTTTCACAG
Affx-93440072	CM037938.1	1	80861435	T/C	C/T	F	GCCTATATTTCTAGTTTAACCTCATCCTATAAAAT[C/T]ACATACAAATGTTTACTTACCGTAGAGACAGTAAA
Affx-87916793	CM037938.1	1	80879867	A/G	G/A	F	TCAGCGTCCTAGCACTCTCAGACACTCCAGGTAAG[A/G]AAGTGTCCTTTTCTATTGTGTAAAAGCACACTCCA
Affx-1205097169	CM037938.1	1	80945536	A/T	A/T	F	GTTATAGCCTGGACTCATTATTGGGACGCTTGTCG[A/T]GAGAAATTATAGTTATTACTGGTGCATACATTTGT
Affx-93357279	CM037938.1	1	80983367	A/G	G/A	F	ACAAAAACACTTGTTGATGAGACAATGACAGCTCC[A/G]TTGTGGATAAGCACTTCTCTGACTTGCACTATCGG
Affx-93269440	CM037938.1	1	80983972	T/C	C/T	F	AAGATATTGAGACATTTCTGAAGTTGAACAGTTGG[C/T]CTACTTACTCGTTAACATCTCATCACAATATGGTA
Affx-87993602	CM037938.1	1	80996848	A/G	T/C	R	ACCAAACAGAGGCCCAGCCGGGGTGCGCCGGGCAC[A/G]CTATCTCCTTCTGGTTCTCCTCGGCAACAGAGATA
Affx-93385050	CM037938.1	1	81017815	A/G	A/G	F	ATAATAATAATATGAAGCTTGTGAAAATGTGAAAA[A/G]GGCGGCCCTTGTGAAAAAAGGAAGGCAACGCTCTG
Affx-1205097170	CM037938.1	1	81064733	T/C	C/T	F	AGATGTTTGGGGGGGTTGCTGAATTTTTTTTTGCC[C/T]GTGTTACAGACGGCTATATCGGTCCGCTAATACAG
Affx-1205097173	CM037938.1	1	81131976	A/T	T/A	F	TGTTAGTCAAATATTTGCCTTTAGATTAGAACTGC[A/T]GAAGTTATTTTCTGAAGGGATCGTTTTATATGAAG
Affx-93323153	CM037938.1	1	81150600	T/C	T/C	F	GTAGACCACTTCCACAGTATTATGACATGTTCTCG[C/T]GTGAACATTCGGCGCTAGCCAACGGTATCAGGCAG
Affx-98998805	CM037938.1	1	81174955	A/G	A/G	F	GTGGAGGAGATGGTGGAGGTGATTGCATGGTGCAG[A/G]TAGGAAAGACATGCCAGTGTTCTGTAAACTCCTCA
Affx-1205097223	CM037938.1	1	81337815	T/C	G/A	R	GCCCTGCCCCCTGGTCTACATCGCCCCTCATCTCA[C/T]ATAGGAGCCTTATAGAAGCCTCTGGGCTCATGTCT
Affx-1205097220	CM037938.1	1	81410130	A/G	C/T	R	CAAGGAAACTTGTCTTCATTACTACTCTATTAAGC[A/G]TATCTGCCTAATTACATGTGTGTGATAAACCTTTA
Affx-88012134	CM037938.1	1	81419742	T/C	T/C	F	TTTGATAATAGTGGGAAGCTGGTGTGTAGTCGATC[C/T]ACTGGTTACCAGCTTCTCACCCTGGAGAAAGACCA
Affx-1205097219	CM037938.1	1	81422481	A/G	C/T	R	CTTCTAATCTTGCAATAACTTATCGTATGTAATTG[A/G]TGTGGCTGTTATTCAGCTGTGCATCGTAGCTAAAC
Affx-88123992	CM037938.1	1	81427869	A/T	T/A	F	CAAATGTTGGCATGGAAATGCAAGCTTTTGTAAAC[A/T]AATTTGAAATCAGAGTTTGTAATTGCGATATGTTT
Affx-1205097218	CM037938.1	1	81437021	A/C	T/G	R	CAGTCACACTTTCATATCGCTAGTTATTTTAAATA[A/C]AATTGTTTTAATGGCATTGTAAGAAGTTAATTGTC
Affx-1205097216	CM037938.1	1	81447316	T/C	A/G	R	ATTTATTGATGTTCAGTCAGGGACAGCACATAGGC[C/T]ACTCTCAGTAGGTTCAGTTAACCCTCAACTTTAAG
Affx-93441990	CM037938.1	1	81474282	A/G	A/G	F	ATGCCTCCTTTTGTTAACTAGCTGCTACACCAACT[A/G]GCGAGACTGCACCAAAAACATTTCCCCTATAGAGA
Affx-99006357	CM037938.1	1	81474808	T/C	C/T	F	GGAAAGTGTTCTTGCTGGTTTTTGTTTTACTTGCA[C/T]TGCAGTTCCCCTCCACTCGTCCATGTTTTATGCCC
Affx-98999518	CM037938.1	1	81475150	A/G	G/A	F	GTACAAAGTTCAAAGTAATGGAACAGGCATTATTA[A/G]GACAGACTGCTTGATAGTTTGCACTACAGAGGAAG
Affx-1205097214	CM037938.1	1	81475351	A/C	T/G	R	GAAGGAACTAGCTAATATATCAGACTGAAAAAAAA[A/C]CCCACATTAAATATATTAGACATATACACACAAGG
Affx-93427290	CM037938.1	1	81476882	A/G	G/A	F	GGAATGTCCACCTTGTGATTGTACCACTTTCTGGT[A/G]TGCTATCACTTTTTCTTTCTAGACAACTATGTCAC
Affx-1205097213	CM037938.1	1	81490788	C/G	G/C	R	AAACCATAGGAATATATACATTGTTAGTTCAAGAG[C/G]AATGTAATAGAAGATGATATAGCAACTTACGGTAT
Affx-1205097211	CM037938.1	1	81498817	A/T	T/A	R	GGAGATTTGAATTATTTAAGCCAGCTGTATGGATT[A/T]AAGCAAGTTAATAATTTCACTCTGGCTCTTGAAGA
Affx-87932658	CM037938.1	1	81532622	A/C	T/G	R	AGGGGGAAAAGTTAACAGCTCAATGAAACATAACT[A/C]ATTTGATAGATTGTTTCTAAACATGTACAGCCTCT
Affx-87988570	CM037938.1	1	81546084	T/C	T/C	F	ACACTGTGGTGGACCTGATCCTGGACCAGGCCGTA[C/T]ACTGGCAACTCCTTGCCGTCCTCGTCACCTTCAAT
Affx-1205097209	CM037938.1	1	81554420	A/G	C/T	R	GTTATTTCTGGTTGTTTACCAAAGTTAGTGGGCTA[A/G]CTCATTAATCCTGCTTTATAATATACCCCCTGATT
Affx-98666665	CM037938.1	1	81580566	A/G	G/A	F	CAGGTACAGACATGGCACATGTCAAGGGTTATCTA[A/G]GGGTTTCCCAATGTCCATTCTGTCACTCGTGGGAA
Affx-1205092645	CM037938.1	1	81594438	A/C	T/G	R	GCATTGATGTTCCTAAATACAAGTTCCAAGTTGCA[A/C]AGCAAAATATTTAGGCACAAAAGCAAGTAAAATGG
Affx-1205092643	CM037938.1	1	81625937	T/G	A/C	R	TGCACTGCTGACTCTGACCCCTCTCCACAATCCAC[G/T]GTAATGCCTCATTAGAGATACGAGGGATTTTTTAA
Affx-1205092641	CM037938.1	1	81660539	A/G	C/T	R	TTGTCTCAGACAGTCCATCAAAGATGCACACAAAA[A/G]AAGAGTACCTAAAATATATTCATGTTTAAGACTCA
Affx-98669575	CM037938.1	1	81671614	T/C	G/A	R	CCAATGTACTTGAGATTGTTCTGGATGATCACGTC[C/T]GTGACGGCGTCGAACACAAACTGGATGTTGCTGGT
Affx-1205092639	CM037938.1	1	81685241	A/T	T/A	R	TCAAATTAATTTGTGTTGGGGTCTGTTTAAGCTTC[A/T]ATATGAGGTCCTGAACCTAGAATGAAAGTGCATCC
Affx-93444488	CM037938.1	1	81690324	T/G	T/G	F	TGTGGCTCTTTTCTATGCTTTCAAATACAATTGAT[G/T]AATCTTTTCTCTCTCTGTGCCCAAGGCTCCAGAGG
Affx-1205092636	CM037938.1	1	81695850	A/G	T/C	R	TGGTCAGAGTGAAGTATTCTCTCGTTTGTGTCTTG[A/G]AGTAGCTAGCAAGCTAGCCAACGTTAGCTTGGGTG
Affx-1205092633	CM037938.1	1	81702647	C/G	C/G	R	CCCAGTCGTGAGTCTCCAGGCACTGTCCTGTTGTG[C/G]AGCTTGTTAACATCATAGGGAAAACATACAGTAAC
Affx-1205092632	CM037938.1	1	81709253	A/T	A/T	R	GTCTATCAAACTATGGCACACGACCAGTAGAAATT[A/T]GAGTTATTTGGAAGTGTGACATACATACACACTGA
Affx-1205092628	CM037938.1	1	81717887	T/G	A/C	R	GAAACATGATTTTGAACACTTGACATTTGAAAAAC[G/T]GTATTTCTTTCCCACCTGGTTTCTGTGGCTAAGCT
Affx-99009263	CM037938.1	1	81722071	T/C	C/T	F	TGCAGCTGCTATTATCATGGCAACTTCTCCCTCAA[C/T]GCTGCCTTCGAGGTCAAGCTGCACTGGATGGCCGT
Affx-98684197	CM037938.1	1	81724158	A/C	G/T	R	TGTCTCTCTTTCTCAGTTTCACCTCTCCATCTCGT[A/C]TTCATGGAGCACTAGCGTTCATTTTCTCCTGGCAG
Affx-1205092627	CM037938.1	1	81740495	A/T	A/T	R	CATTTCAATGAAACTACATGTACGTTGAACCAATG[A/T]GGAATAGATGTTACTTTGATGTCTGTGCCCAGTGG
Affx-1205092626	CM037938.1	1	81760635	C/G	G/C	R	TTGTTTACGTGTGTCGGTCTGTTTTTCAAAATGTT[C/G]TAGATTATTTTGGAAGTTCCTGAAAAACAGAACCA
Affx-1205092624	CM037938.1	1	81818713	T/C	A/G	R	CAGAAATTGTAGTTCAATTAGGCTACATCATTTGT[C/T]ATTTATATTAGGATATAGAATTTGAATTTAATATT
Affx-1205092623	CM037938.1	1	81823581	T/C	A/G	R	CAGTGAGTCCACAGACAGACCATTGGCAACCACAT[C/T]CGTAGCTTGAAGCACCACAGTACGGCGACATGTAA
Affx-1205092622	CM037938.1	1	81830850	A/G	C/T	R	CTTCCTCATGCCAATGGAGCTGGCTGTAGGCCTAT[A/G]CAGTACTATACACAGACTGTACAAAACATTAAGGA
Affx-1205092619	CM037938.1	1	81860779	A/T	T/A	R	CCAAAATGGGTCTAAATAAAAATTTACAAGCAATA[A/T]TTTTTTTTATGTATTGTTTTTGACCGGAAGAGGCA
Affx-1205092616	CM037938.1	1	81869350	T/C	A/G	R	TCGATACGACACTAAAAGAGATGTGAAATCATAAG[C/T]AAAGCCACTCTCTCTTTCACCTCCTCCATCCTCTT
Affx-1205092613	CM037938.1	1	81876486	C/G	C/G	R	CGATCCTGCCTGGTTCCCTCAGAACTGTTTCAAAC[C/G]CTGTCAGAACCTCCTAGTACTGGGAGAGGAGAGCC
Affx-1205092611	CM037938.1	1	81885320	T/G	C/A	R	TGATTTAATCGCTTCAGTTTGTGTTGGGATAGAAA[G/T]GGTTAACACTGAAGAGAGATTCAATCAGAATTTTC
Affx-1205092609	CM037938.1	1	81896739	A/T	T/A	R	CAATTGGTGTATGCATTCTAATTTGCCAAAATGTA[A/T]TTTTTTTTCTCTCTCTAAGGTTAGATGTCTTTTAA
Affx-1205092607	CM037938.1	1	81903407	A/C	G/T	R	GGACATCAGCTACTTATGCTAGGTCTTTTCAGAGC[A/C]GACCATCCTACACATCATGCAGCACTGGCCATTTA
Affx-1205092604	CM037938.1	1	81926828	T/C	G/A	R	TATGCCATTGAATGACCACAGCACAGGGCTTGTGA[C/T]GTTATGCAAATATTTCTGGGAAAAGTGGGAGAACA
Affx-1205092596	CM037938.1	1	81964993	A/C	G/T	R	GGATCTTTCAGTGCTAGAATCAGTTATTTTAAAAT[A/C]AATTTTCAGAAGTTCCGAGCTAGCCCTCGTCATTT
Affx-1205092594	CM037938.1	1	81972692	T/C	G/A	R	AGCATTTCTAACGTGATTTAAAAATAGTATAGAAT[C/T]TTGCAATATATGTACACATTCAACCTCTATGTAAC
Affx-1205092590	CM037938.1	1	82029876	A/G	T/C	R	ATGGTGACTAGATTAGGGTCCTAATGCTGAAACGC[A/G]ATAGAGACTACTACAGTTAATAGTCTCCTTCATTC
Affx-1205092589	CM037938.1	1	82073018	T/C	A/G	R	AAACCTAATGTCTCCATCATAATCCATTCAAAAGT[C/T]ATTGAAGTTTTTACCCTTGAAGTACAGACAGAATT
Affx-1205092586	CM037938.1	1	82097403	T/C	G/A	R	TAGACTTTATCAGAGTGGTTTTGGAGTGAATATTC[C/T]GTAAGTAGCCTACGCTTATTCTTATTTTTTGGCCA
Affx-1205092582	CM037938.1	1	82872674	A/T	A/T	R	CGCAAGCGGGCTGCAATAAAAAAAAAAGTTCCACT[A/T]ACCAGTTGATGACCATTTGAAACTTAACTTCTTGT
Affx-1205092580	CM037938.1	1	82976045	C/G	C/G	R	TGCGATGAATAACACAATTACTGGGTAAAACAGCG[C/G]CAAATTAATTTGATTGAACTGAAGGGGTGTATTAT
Affx-1205092578	CM037938.1	1	83060209	T/C	A/G	R	CTGGAATATGTAGAGGTTGTTGGTGGTTGCCACGG[C/T]GATGATGTTGTCCTGAGGGTGCCAGGCAGTGTGGA
Affx-98682851	CM037938.1	1	83062747	T/G	T/G	F	AATTTTACAGTTTAAATCACAATGCCTCCAATCAT[G/T]TTTGACAATAATTACAAATATAATACAGCTGTTGT
Affx-1205092575	CM037938.1	1	83176878	C/G	C/G	R	TCAATTTCTCTTAAGTTGTCATTTCTTTTGCTATT[C/G]AATAAAGCCATATTTGTAACTAAATAACTGAAACA
Affx-1205092571	CM037938.1	1	83394323	T/C	A/G	R	GTATCTGAGAAACTTTCGGCCTCCTGGGCCTTTCA[C/T]GTACGACTGTGTGTAGGGTTTACAGAGAATGGTAC
Affx-1205092568	CM037938.1	1	83447913	A/G	C/T	R	ATACGATTGAATTATCTGTGACATACAGTACGGTT[A/G]ACACTGTTTGCCTGGTGGACATGTTTCATTTAAAG
Affx-1205092566	CM037938.1	1	83466221	T/G	A/C	R	CCACATTTTTTTGTTTTTCGAAGTGAGAGTAAAAT[G/T]GATTTAATTGTCACTTTTTGTCAACGATCTACACA
Affx-517057294	CM037938.1	1	83491193	A/C	C/A	F	AAGTGTCCCTGGTCGTGATGGGTGAGACAGACGTT[A/C]CATTTCAACTTTGGGCTAACGTGTCAACATGCTGC
Affx-1205092559	CM037938.1	1	83520454	T/G	A/C	R	AAAACTTAATTCAATGAGATTTAACCAGGTTAGAT[G/T]AATAATTAATAACATTGAGTAAAGTAGACAACAGT
Affx-1205092558	CM037938.1	1	83530165	T/G	C/A	R	GTGAATGTGCCCTTCATATCCTCACTGGTCCAAAT[G/T]AATAGGCTTTCTGCCTGATAACTCTTCAAAGCAAT
Affx-1205092555	CM037938.1	1	83549031	A/C	T/G	R	ACCATGTGTTCTCTTGAAACGTGTGTGAATTTCTA[A/C]ATTTTCCTCTCTTGCTAAGCATTCAAAATGTAACG
Affx-1205092554	CM037938.1	1	83602692	T/G	C/A	R	TGAGAGCTGATTCCCATGAATACGACTGGCACATG[G/T]GCTTGATGAGATCAGAGAGACTCTCCTGTCAGCAT
Affx-87973071	CM037938.1	1	83649418	T/C	C/T	F	GGACTGAGACAGTTCTGTTGACTGTGCATGAGGGT[C/T]CCCTGTAAAGGTGCACTAGGTTAGTAATACCATCT
Affx-87959550	CM037938.1	1	83716144	T/C	G/A	R	AAAGCTGATGCATTGTGTGGCTGCAGAGGACCATC[C/T]GACCCTTATCACTAGTGACATGAGAACCTACTAAA
Affx-1205092552	CM037938.1	1	83739422	A/C	G/T	R	TGCCGTACCGTTACATACAGTATTGCAGCGCTTTC[A/C]ACGAAACGAATAAAAGCTATACAGCTTGTGATGGC
Affx-1205092551	CM037938.1	1	83750777	A/G	C/T	R	TTCTGAAGGCACTGTATCGCGATATTATATAAACT[A/G]TAGACTATATTATACAAGTGTCGATTTGCATTTTT
Affx-1205092549	CM037938.1	1	83795037	T/C	G/A	R	GGCATTTATAAAATTGTACCGAAACTTCCTGTTTC[C/T]GTCACAGCTGTCATGATCGAAAACATTTTTGTATG
Affx-88077917	CM037938.1	1	83931686	A/G	A/G	F	TTTCAATGTCACTGCTCCAATATTTACAGCTTTAA[A/G]TGAAGAGGGAGAAAAAGTGAAAAAGCAGGCTCCAG
Affx-1205092328	CM037938.1	1	84156139	A/T	T/A	R	AGCTCACTATGTTTCCATGCCTTGATCAATTTGAA[A/T]TAAATGAAATCCCATGATCAAGGGAAATGTACTCT
Affx-1205092325	CM037938.1	1	84240875	T/G	A/C	R	ATTATTTCAGTAAAACTATCGTGCCCTTTCTGATG[G/T]AGCCCACACTGAAGGTATGGTAAACAAAAATATAA
Affx-517057309	CM037938.1	1	84306984	T/C	T/C	F	CTGGTGCGCTGGAGGGTGCTGAAGGAGAAATGCAT[C/T]CCTGCTCTGCTGCAGGAGGAGCTGGACAAAAAGGT
Affx-517057311	CM037938.1	1	84376523	A/C	C/A	F	GGTAGGTAGTGTGGTAGATAGTGTGGTACAATGGT[A/C]GTTTTGATAACGCCATGTGAAATCTACCACACTAG
Affx-1205092319	CM037938.1	1	84604492	A/T	T/A	R	ATTCTTAGGATGTAATGGTTGGACAATTTCTCTTA[A/T]TTTCTCAAAAATATTAACTCAGCTTTAATTGGACA
Affx-1205092317	CM037938.1	1	84616375	C/G	G/C	R	GGGGACCTAAGACAGGCCCAAGCTCTTAAAAAACA[C/G]GGTTTGATTTCCTTCTGGATCATTCAAGATTAACA
Affx-1205092309	CM037938.1	1	84697893	A/C	G/T	R	CCAGCACAGTTTAGTTTGGTTTGGCACGATTGTGT[A/C]TAAAAGGTATAAGGTTTCCTGAACACCACCCTAAC
Affx-1205092308	CM037938.1	1	84703803	A/C	G/T	R	AATAAGTGTGTTACATTCTGACATTTTTTAACATT[A/C]TTTTTAAAATTCACAGGAAAGGGAAATCAAGCAAA
Affx-1205092307	CM037938.1	1	84732789	A/G	T/C	R	GTAACTGGCAAGCCTGCTTCCCAGATTGGGATAGG[A/G]CCCTAAGTCAATACCTCACAGTGTGCAAAATGTCC
Affx-87909814	CM037938.1	1	84785856	T/C	T/C	F	TTAATTGAGATATATATCGTGAACTGCCCGTAAGT[C/T]TGAAAAAAAATAGAGATATGATTTTTAGGCCATAT
Affx-1205092305	CM037938.1	1	84968688	A/G	T/C	R	TTAAGGATATGCATTGATACTGGAACCATGAAGGT[A/G]TCCTTTTTGCATTTAATTTGTCTTTCTTACTAAGA
Affx-1205092303	CM037938.1	1	85115415	T/G	C/A	R	TGATTTCCTTTAATTAACTCGACACTGTCTAGCTA[G/T]AATTATTTTCCGCATTCTCTAAATTCAATCCAAGT
Affx-1205092302	CM037938.1	1	85154956	A/T	A/T	R	CAAGCTTTAGCAATTATAAGAATCATGTCCTCTGT[A/T]TCTCAAAACTCGTGTATTTTCTTATTAAAGAAAGT
Affx-1205092301	CM037938.1	1	85163126	T/C	G/A	R	GTCCTGTTCACAAAGATAAATATTGAAGTTGTTTA[C/T]GAATGCCGGTTCTAGTTTAGTTGTTTCAAAACCTC
Affx-1205092299	CM037938.1	1	85183294	T/G	C/A	R	CTTAACCACCTGAACTTGTCCAATAAGAATGCTCC[G/T]TTTTGAGGAAATCAGAGATACTTTGCAGTGTATCC
Affx-88008723	CM037938.1	1	85214856	T/C	G/A	R	CTGCTCAACTTCAACCCTGGGGTCAAGCAACTGGT[C/T]GCTGCCCCCACCAGCCTGGCCCTGGACGGAGAGAG
Affx-1205092298	CM037938.1	1	85266923	A/C	T/G	R	CTGGTTATATTGACTTCCTTTTATCACTGAATTCT[A/C]CGACTTTGAATTCTTACTTTGCATATTAACGGAAC
Affx-1205092296	CM037938.1	1	85289110	T/G	A/C	R	ATGTTTATCTGGTATGGTGAGACAGAATCTGTAGA[G/T]ATGTTTTTCACCGTCTTTCAAGAATTCTGAGAATA
Affx-1205178668	CM037938.1	1	85411176	A/C	G/T	R	TTAAGTAATCTCAAACTCATTCCAGGCCTGCTAGG[A/C]AAAGGTATCATGGTTGAGGTGAGCATTAAAATCCT
Affx-1205092294	CM037938.1	1	85447830	T/C	A/G	R	CGTGATAATATCATGTCGTGAGGTCCCTGAAAATT[C/T]CCAGCCCTACTCTGTATAGTATGCAACCCATAGCT
Affx-1205092293	CM037938.1	1	85454532	A/T	A/T	R	AACACCGTATTGACTACAGGTGTATGGGATTTCAC[A/T]GTTTTTCTTAGTAAAAAAAGTGACTGCAAATATAT
Affx-1205092292	CM037938.1	1	85466266	T/G	A/C	R	AAACAGAGGGACATTGTTGCTAAGTGATGTAACAG[G/T]CGCACACAGTGCATTCGGAAAGTATTCAGACCCCT
Affx-1205092291	CM037938.1	1	85486750	T/G	A/C	R	GGTTAAATAAAGGTGAAATAAAAAAATAAAAAAAT[G/T]TAACTTGACCCAGTCCACAGAAGGGAATCATTAGA
Affx-1205092289	CM037938.1	1	85511068	T/C	A/G	R	GTCAAAGGTTAGCTAAGAGAAAAGAGGCAGGGCGT[C/T]AGTAGGAGATAACCGACTGCCAAGCAGTCATAGGG
Affx-1205092287	CM037938.1	1	85525848	T/C	G/A	R	GTTATTTCATAGTTTTGATGTCGTCACTATTATTG[C/T]AATACACTACGGGTCAAACATTCTTTATTTTTACT
Affx-1205092285	CM037938.1	1	85546637	A/T	T/A	R	AGGCAACATGCAAAGAGCTCGGTAGACTAGCACTA[A/T]AATACATGATCTGAAACACATATTCAATCACCCTC
Affx-1205092284	CM037938.1	1	85749837	T/G	C/A	R	GGCATTTGTGATTGTGAGCTGTTTCTCTTTGAAAA[G/T]AATTACATGTCGCCAGCATGTAGGCAATATAAAGG
Affx-1205092279	CM037938.1	1	85775000	T/G	C/A	R	GCCTGCTTTAAGCTAATTAGTTTAGACTAATTTGA[G/T]TGTTGGCTGTCAGAATGTAACAATACATCATATAA
Affx-1205092278	CM037938.1	1	85850441	C/G	C/G	R	GAGTTGCTTTTTTGGAGAGAATTCTGAGAATTGGC[C/G]AAATCATTTTTTAAACAAATTGGATGAGGAGAAAT
Affx-87933680	CM037938.1	1	85854234	T/C	C/T	F	CATACTCACTACTGTACACTAGTTGGCTGTTGACA[C/T]AGTTCATTTGGAGAGATTTCAGATGGAGATCCATC
Affx-1205092277	CM037938.1	1	85898823	T/C	G/A	R	AAGTTTTTTAATAATACACTCAGCACAAAAATAAA[C/T]GTCCTCTCACTGTCAACTATGTTAATTTTCAGCAA
Affx-1205092274	CM037938.1	1	85913637	A/C	T/G	R	GCTGTGTGGGTGTTGTTGTGAGAATCTAAATAGGA[A/C]GTTTTTGAATAAAGAAATAAATGCTAAATCACACT
Affx-1205092272	CM037938.1	1	85924332	T/C	G/A	R	AAGTACTGTAGCAGTGTAACGTCAATTAGTCGTAA[C/T]TACTACACCGCTGAATGATCCTCTGCCAAGGAACA
Affx-1205178667	CM037938.1	1	85937496	T/C	G/A	R	AGGCAGAAAAGGTTGGAACTGGGAAGACTGGAAAA[C/T]GGGAACTAGAGAAATAGGAGTATGGAACAACACAC
Affx-1205092271	CM037938.1	1	86087373	C/G	C/G	R	GATTTGGACCGCATACCATGGTTGAAGGATTGACC[C/G]TAGTATGGGGTCTACATGGATTATAATTGAAAGCA
Affx-1205092270	CM037938.1	1	86309991	A/G	T/C	R	TGCAAATAGGCCAGAATGGTGTGCACTGAGCAGGT[A/G]CCCGCGCCACTACCAAATTAAACAGTGAGACAGGA
Affx-1205092268	CM037938.1	1	86425862	A/T	T/A	R	AAAACTTGCCTCTTGATTTCATTGCTGTTCTGGAC[A/T]GTTTCAATATTACCCAACATGTCAATTTTACCACT
Affx-1205092266	CM037938.1	1	86431658	A/T	A/T	R	TCTGGATAAGAGCGTCTGCTAAATGACTTAAATGT[A/T]AATGTAGGCTAAAAGTTCTGATCTGTTGTTTCAGC
Affx-1205092262	CM037938.1	1	86514702	A/C	T/G	R	TGACATCAGCTGATGTAAGAAGGGCTTTATAAATA[A/C]ATGTGATTGATTGACGTGCCACTCCTCCTGTTTCT
Affx-1205092261	CM037938.1	1	86525482	A/G	T/C	R	AATAGACATTTGGATGACAACTAAAACACAAATCA[A/G]ACATTGTTTTTCCAATGGAATTTGGTTGTGCTTTT
Affx-1205092258	CM037938.1	1	86592324	T/C	A/G	R	GGGACCCTTATTAAGGTAAGCGGCATAATTAGCTA[C/T]CCTAACTTCCAGAACATTTTAGCCAAAAACCTTGT
Affx-87874648	CM037938.1	1	86944091	A/G	G/A	F	ATGTACATGCCAGTGACCACTACTATCAATGAGGA[A/G]GAGCGGTGTGAGCATGTAAATTATCATTCAACCCA
Affx-1205093863	CM037938.1	1	86948675	T/C	A/G	R	AGCTGCCCCTGGGCCAGTGCTGACTGGCAGCAGGC[C/T]GAGGCCGATGAGTCAGACTTTCTCCTGGAGGTGGC
Affx-1205093862	CM037938.1	1	86955745	T/G	C/A	R	TGTGTTCATATGAGACAATGTTATGTGAATATTAA[G/T]TAGAGAAGGGATCTTTTCCATATCATTACACTCAA
Affx-1205093861	CM037938.1	1	87104609	A/G	C/T	R	GCCAACCTGGCACAATTAGCTATGATGCTGAGGAC[A/G]ACCAGCTGAGCACATTAAATCCTGTAAAAGATTCT
Affx-1205093860	CM037938.1	1	87109989	A/C	T/G	R	AGATGTAAACTTTTAGACCATCAAATAGACTTGCA[A/C]ATTTACCCAAATCGTTGGTAGGTTCAATCAAACCC
Affx-1205093859	CM037938.1	1	87115264	A/G	T/C	R	TATTTAGAATGACTTATTTCTGTTTTTAGAGGAAG[A/G]GAAACCAAAACCTTTTTTTTCGAAAATCAAGGGTT
Affx-1205093855	CM037938.1	1	87125313	A/G	C/T	R	GGAAAAAAGTGTTAATTACAGAAATTATTATAGTT[A/G]AAATGCAGCCACTGTCATTGGCCTACTTGAGTTGC
Affx-1205093853	CM037938.1	1	87130296	C/G	G/C	R	TGCACCCGTTTCAAAGGAAGGCTGCTGTTTCTTGA[C/G]AGTTGTATTAGTAATTCTGACTTGTTTTGTTTCGT
Affx-1205093851	CM037938.1	1	87137431	T/G	C/A	R	GCAAAGATGATTTAAGGGCCGTCTTTGTGGTTATA[G/T]GCACATAGGGTGTTTTTGTCAGTTTTCTAAATGTT
Affx-87976945	CM037938.1	1	87361939	A/G	C/T	R	AGATCTATCCAGGCTGCCAACCTTAATTCAGCTCA[A/G]CGGACATCAACGTTTATGCTTGGCCAGTAGTCATC
Affx-1205093849	CM037938.1	1	87377820	A/G	C/T	R	TGGTGATGACTTGGCTCAGAGAGACAGACTATTTA[A/G]CACTGTGAAGAAGTGCTTGTAAAGCCACTGAGAGA
Affx-1205093846	CM037938.1	1	87384899	A/G	C/T	R	AGTAGTAGCTATTAAGTGGTTATATATTTGTGAAA[A/G]CGAAAGCATTTCCTACCCCATAAAACCCAGGCTTG
Affx-1205093841	CM037938.1	1	87413688	C/G	G/C	R	TCCTGAGGCTGGAGCTGCGCGTTGGGGAGGGAGTA[C/G]TGTCACGTGTGCTCCCTCTCCGGCCTCTAGGTCAG
Affx-87936865	CM037938.1	1	87421014	T/C	A/G	R	GTCTTACTTTGTCATAGAATAAACTAAGGCACTGG[C/T]ATAGTTACATAGTGTTGTCTGTCTTGAGCAATAGT
Affx-1205093840	CM037938.1	1	87427379	T/G	A/C	R	ACAGCAAAAATGTTCTCTTTTCCCCATGGCAAAAT[G/T]AGCAGAATTGCCTGAAATGTGGTATAAAATTGGAA
Affx-1205093838	CM037938.1	1	87612275	A/T	A/T	R	GTCTTCAGGACCAGAGTTGGTGAAGCTTGCGCCAT[A/T]CTCCTACGTATGACTGTGTTTTATATGTACTGCAT
Affx-1205093836	CM037938.1	1	87651855	A/C	T/G	R	AGCAATAATGTTATCTCCATAAGATACATGCATCA[A/C]TGACTTTACTTGTATTATTATTATTGCCTCAAAGA
Affx-93445837	CM037938.1	1	87653965	A/G	C/T	R	CCTGAGGACATTGAGCGGATGGTCAACGACGCAGA[A/G]CGCTTTGCCGATGAGGACAAGAAGTTGAAGGAGCG
Affx-1205093834	CM037938.1	1	87657641	C/G	C/G	R	AAAAAAAAAGAAATTCCGGGAGCCTGTTTTTGGGC[C/G]ACTTTCCTGGTGGCTAACTAACGTTAGCTAGTTAT
Affx-1205093829	CM037938.1	1	87675271	A/G	C/T	R	CAGGGGTGCAGTTCTGTGGAGAGAGAGGAGGAGAG[A/G]GAGAGGAAATTGCTTTGAGTGAAACTAAAAAACAT
Affx-1205093827	CM037938.1	1	87681377	A/G	T/C	R	CAGATCCTGACCCCACTCTCTGAGGGTGTCTCAGG[A/G]CGAGTTGGGATATGGAAAAAAAACACATTTCCAAT
Affx-1205093823	CM037938.1	1	87700745	A/T	T/A	R	TGCCACTCTGTCTCCTACAGTTGTAGTCTGCTTTT[A/T]AGCGTTTATGCTAACTAGCCCCTCCTTTGATAGTG
Affx-88110501	CM037938.1	1	87744201	A/C	A/C	F	AATGGGACCGGCTCAATGGGCCTATCTACTAGCAT[A/C]AAACACAACTATCATTGTGATTATATCAGTGTCTC
Affx-98999530	CM037938.1	1	87748777	T/C	C/T	F	TCTCGGATATGCTGGGTGACAATCTTCTCCATCTC[C/T]TCCCTCAGCATGGGGTACTGAGCCAGCTGTGGGTA
Affx-1205093821	CM037938.1	1	87789728	A/G	C/T	R	TAAACACAATAAACAGGCAAAAAATAAAAAAAAGA[A/G]TCACGTGTACAAAAAAATGTCATTTGACACATGAA
Affx-1205095049	CM037938.1	1	87824758	C/G	G/C	R	TGTACGGTTTCGAGCTGGCAGGGTTTGGCCAAAAG[C/G]TCTGGACCAGGTCCTCAAACTCCGGCACCATTGTG
Affx-1205095048	CM037938.1	1	87851470	A/G	C/T	R	TGTGCTGTTCAGAGAAAAGTTTTTCAGTGAAAAGG[A/G]TACAAATTGGTCATGTTCCTCAAACTTCAATATCA
Affx-1205095047	CM037938.1	1	87868229	A/G	C/T	R	AGAGGAAAAGGTAGAAATGAAGCAAGAGAAAGAGG[A/G]AGCGAATTGGTGGCAAATGAGGCATGAAGCGCTGA
Affx-1205095046	CM037938.1	1	87876451	T/G	C/A	R	AGAATATGAAATGTCAGGAAAATAGTAAAGAGAAT[G/T]ATCTATTTCAGCTTTTATTTCTTTAATCACATTCC
Affx-1205095044	CM037938.1	1	87896086	C/G	C/G	R	TTCCTGTGTCCAAGATAACCTCATCATCCTTCCTT[C/G]CAGGACCAACTCAAATCAGACAGCTGTAATAGGCA
Affx-93352646	CM037938.1	1	87917723	A/G	A/G	F	CATGTATTGGTCTGTAAACCTCACACGGCCATAAT[A/G]TGTAGACTACAATATTACAATTGACCAAACCACAC
Affx-87927228	CM037938.1	1	87934857	A/C	C/A	F	ATATGAAGGTGTTCCGCAGGGGTCGATACTAGGAC[A/C]TGTTCTTTACACTATTTATTCAAATGCTATTGGTC
Affx-1205095043	CM037938.1	1	87952120	T/G	C/A	R	TCGATTAAATTGATTAATTGAAAGTTTGTTGAAAA[G/T]AATAAAAAAAACTCGGAAAAGCATTTTCATTCTCA
Affx-1205095042	CM037938.1	1	87964583	A/G	C/T	R	AAAATAATCTAATTGGGAAACCTCTAAATAAAAAC[A/G]CACTACTTACAAGCATGATAAGAGCAAGGTTTCAC
Affx-1205095040	CM037938.1	1	87976328	T/C	A/G	R	AGAAGTTGCCATACTCAATGCCATACTCAACCTCT[C/T]GATCCGCTTCACTACAGCCCTGTCGATATGGATAG
Affx-1205095037	CM037938.1	1	87986198	A/G	T/C	R	AACTAAAAAGGCAAGCGGGCAGAGATCAGCTTTGG[A/G]GCGGCTACGGCATAATCAAACAAAGGTGGACAGAC
Affx-1205095036	CM037938.1	1	87991457	T/G	A/C	R	AAATTGTGAATAACTCTCCAGGGTTAGTGAGAAGG[G/T]TGTGCTTGAAAGGATGCACATAACTCTGCAATGTT
Affx-1205095032	CM037938.1	1	88002897	T/C	G/A	R	GTGAGGAAGCAGCACCTGTGCTAATCTCCTCATTG[C/T]ACGCTGGAATGCTAGAGGCTGAGATGGGGAATGCA
Affx-87959977	CM037938.1	1	88015005	A/G	T/C	R	AGCAGCTGTGATTTGACTATGGTATTAAAGGCAGC[A/G]ATATGAACTGAGATCTTTAATCAAGACCAGGCCAA
Affx-1205092951	CM037938.1	1	88105454	T/G	T/G	F	GGAGCCTGACGAGTCGGATGGTGGGGACTTCGAAG[G/T]TGCTGCTAAAGTTATGGACGATGATTCTGTAAGAA
Affx-1205092954	CM037938.1	1	88185754	T/C	T/C	F	ATTAGCCTACAATATTATGTAAAAAGAAAACGTTG[C/T]ATCCCAATGCCATACACATTTCCTTTTTCCTATAT
Affx-1205092956	CM037938.1	1	88196484	T/G	G/T	F	TTAACATTGACCATATACAATTAACTGTAGAAATC[G/T]ATCATAAGAATATCAGAAATCCCTTCAATAAACTC
Affx-88023332	CM037938.1	1	88293334	A/G	T/C	R	TCCCACAGTCATCTACATCCTTCTGCATGAACTCA[A/G]TTGCGTAAGATGAACAGAATATTGATTGATTTCAC
Affx-87993609	CM037938.1	1	88445697	T/C	T/C	F	ATTTCTCCTGTCTCATTCGGTATCCTGTGTGAATT[C/T]ATGCTCCCTCTAATTCTCTCTCTCTCTTTTTCTCT
Affx-88003654	CM037938.1	1	88512333	A/C	A/C	F	ATATTTTTCTGACCCAGTTTTACAATCAATTGCGG[A/C]ACAGCCATTCAAGTATCTAATAACACCCTCCGCGT
Affx-87863255	CM037938.1	1	88704359	A/G	C/T	R	ATGAGATCCAACCCATTGGAACAGATAAGTCTCTT[A/G]GTGCCGATGAACAAGGTGAGCTGATGTTTTTTCAA
Affx-98993273	CM037938.1	1	88711397	T/C	T/C	F	AACCCCATGTACAGATATATCTCATGTGTAGATAG[C/T]CCCAACTAGAAGCTGCGAGTCAAGTCTTGCAATGC
Affx-1205092960	CM037938.1	1	88811878	A/G	G/A	F	TTATTCTCTCCCTCTCTCTCTTTCACACATGCAAC[A/G]CACACTTACAGACAAATAGTTAATCCGATCTATCC
Affx-1205092961	CM037938.1	1	88816836	A/C	C/A	F	CAGTTTTATACAATACACATGTCCCTTTTTGCATT[A/C]TAGGGTATGTTTTTCAGGATTCTCTGTGTTAAATT
Affx-1205092962	CM037938.1	1	88829717	A/G	G/A	F	AAAATCCTATAACATTGGTTTTGGGAAATGATATC[A/G]AATGATCCAATCTGCACTTTCTGCAGAAAAAATCC
Affx-98987379	CM037938.1	1	88845112	T/G	T/G	F	AGTCCCTCCCTATCGGGCTGACGTACCGGATGGGA[G/T]TCTTCACTGTCCAGAGGCAACTGCTGTTCAGGTCT
Affx-1205092965	CM037938.1	1	88881585	T/G	T/G	F	TATTCTATTCAATTAGTCTGAAATCAAATAACGAC[G/T]TTGACAGATCAATGTCTTTTTTTTTTTATTGAATG
Affx-1205092968	CM037938.1	1	88909653	T/C	C/T	F	TGTTGTCTTTTCCTCAGTAAAGAAGTGATGAGTAC[C/T]AGAAGAGCAGAATATAGCTCTAGTAATTGTAGTGG
Affx-1205092972	CM037938.1	1	88933920	A/T	A/T	F	ATCTGTTGAGGAACCAAGACAACAACAAAAAAATC[A/T]AAAATCTTGGGATGTATTCAATAAACATTGCAGAA
Affx-1205092973	CM037938.1	1	88937514	T/G	G/T	F	AACGCGCCACTACCAGTGCTTCTTCGACTTGAAAC[G/T]AGGAGTGAACGTAACATTTCTATGTTGTGAGGTGG
Affx-93352132	CM037938.1	1	88940116	T/C	T/C	F	TAGCTAGTTTGACCATATTGTCAATGTTAAACAAG[C/T]TAGCAAACTTTATTATAAGCAATGTTAAAATGTTA
Affx-1205092976	CM037938.1	1	88949672	T/C	C/T	F	CTTTAGTTAGTAGACACAGGCTTACTTTGCACACC[C/T]TCACAAATACTCCCAGACCCCACGCTCTTGTCATG
Affx-1205092977	CM037938.1	1	88959619	A/T	A/T	F	TCTTAATTTAGAAACACTGACGTGATCGTGCCAAA[A/T]TGACACTGTCAAGTCATGAAAAACTACTTTTACTT
Affx-1205092979	CM037938.1	1	88992474	T/G	T/G	F	CTAAATCTGTTATTAAACAATAGGTTTAAAACAAT[G/T]AAATGTAATGACAGAAAGCTAACTTCAACTTATTC
Affx-93298509	CM037938.1	1	89019527	A/G	G/A	F	CTCCTTCTCTCGCATTGTTACTCTTTCTGTTGTGC[A/G]CTTTCTCTCCCGCACAGACAGAATTGCAAACAGAC
Affx-1205092988	CM037938.1	1	89033199	C/G	C/G	F	CTGTCTATGGGAAGACCACCTCACAGAATAAAGTG[C/G]CATGACCTATCAACAAGTTTGACTTGCCTTACTCA
Affx-1205092993	CM037938.1	1	89050354	A/C	C/A	F	CAAACCTTTGACTGGTTCTGTATATAAAAAACTCT[A/C]AGCATGCATCACATTTGTGTTGTGTGACTGGCTCT
Affx-1205092995	CM037938.1	1	89055205	T/C	C/T	F	TGCAACTAGAAATGAGGGATAACATAAGCAATATA[C/T]AGAGTTACCACAGCTGCTCTTCTATGTTTTTGCCT
Affx-1205092999	CM037938.1	1	89082722	T/G	G/T	F	TACGTTTTTTATCCAGCCGTGTCAATACTGCCCCC[G/T]AGCCCTAAACACAATTATAATGACATTTTGACATT
Affx-1205093000	CM037938.1	1	89101199	T/C	T/C	F	TCTATGCAGTGATAAAGGCTAGTTATTCTTAGGCT[C/T]ACATGATTAGTGCATGAATATGCATAAAAAACACA
Affx-93397987	CM037938.1	1	89158819	A/G	G/A	F	TCCTGCAGCAGGCGGAACTTGATTTGGACCTGGAC[A/G]AGCCAATCGATGAGAATAGCACGCATGTTGCCTGT
Affx-1205093001	CM037938.1	1	89177695	C/G	G/C	F	AGTCCTAAGTGTGTGAAATGTATCCCTCACTACAT[C/G]ATGCATTGCGTTATTTACAGTATATGTAACTCAAC
Affx-1205093002	CM037938.1	1	89201820	A/T	T/A	F	CCCCCCCAATGAGGCACTGAACACCCATATGAATT[A/T]GATACGCACCAGGTTCTGCAAGCTCTGCTTTAGGC
Affx-1205093005	CM037938.1	1	89207855	C/G	C/G	F	GTTTGATCCCCTCAAATACAGCTAGCTAACGTTAG[C/G]TAGCATAATTTAACCCCTCATTTATTTTGAAAAAA
Affx-1205093006	CM037938.1	1	89219206	A/G	G/A	F	GGCCTCCCTGATGCTGACCGTCTGGAACACAACAA[A/G]GATGCATCACCACCACCAGTCTATTTAACTAGGCA
Affx-1205178785	CM037938.1	1	89222432	A/C	C/A	F	GGGAATCCATGTTGGCATTTCTGAATAATCTAAAA[A/C]AAACTTACAGTTCAATCTCAACCGATCCTTTGTTG
Affx-1205093008	CM037938.1	1	89234609	A/C	A/C	F	AGCAAGCAAGAACTTGAACATTATCCAATTAGCAT[A/C]TCTCTTGCCTTCACAAATTCACTCTGGCTATCTAC
Affx-1205093009	CM037938.1	1	89246430	T/G	T/G	F	ACAGACACTACTACAGGCACTACTACAGACACTAC[G/T]ACAGGCACTACTCTGTATAGAAGAGAGGACAGTCT
Affx-1205093010	CM037938.1	1	89259717	C/G	C/G	F	CGTTCAGGGTGAAACCCAGTCAGAGTGTCTCAGCT[C/G]TGGGCAGCCTAGTTCAGGCGAGTTACAGGATGAGC
Affx-1205093012	CM037938.1	1	89264626	T/C	T/C	F	TCTGAAAATGCTGTCCACATTAAGAGGATTTACTT[C/T]CATTTTATTTAATTACTTGCATTTATTTATTAACC
Affx-1205093018	CM037938.1	1	89276050	A/C	A/C	F	AAAAACAAATCTAAATAAAATGTAATATACACCAT[A/C]CCAAATCCATTACTTATTTTATGCAGGTATGAAGA
Affx-87886549	CM037938.1	1	89287196	T/C	C/T	F	AACTCTACCAAAATAACCACTGACACATTTACCAA[C/T]TTCACTCACTGAAACTACTACACACATCATGAAAC
Affx-1205093022	CM037938.1	1	89289975	A/T	T/A	F	CAACCCAGCAAATTGAGTGAGTTAGAGAGCCCCGA[A/T]AGGGACGACAGTATTAGGATGTACCAATTCAAGAT
Affx-1205093024	CM037938.1	1	89296906	A/G	A/G	F	CAATATAAAAAAGATCACTTGGATCAGGAGGACAG[A/G]TAGGCCTACCTGTTTGGACCCCAGGAAGAGTAGCG
Affx-1205093027	CM037938.1	1	89309167	T/C	C/T	F	AGTGATGTCAATATTAAAAGAATCAATCACATGGA[C/T]GTGCATACAAACAGAGCTCTGCTAGAGAAGCAATG
Affx-1205093028	CM037938.1	1	89322313	T/G	T/G	F	GACCGACATCTTCAGGTGGTGACAAGTTGGCAAAA[G/T]AAATTGGTGACAAGAAGACAACACAGTCTTTTCGC
Affx-1205093029	CM037938.1	1	89349706	A/T	A/T	F	GCAGCTGAACATTTTGTCTTGTGATATTTAGTTTA[A/T]TTTTTTTTTTTAATTAAATAACATTGAGCAATATA
Affx-98676639	CM037938.1	1	89376310	A/C	A/C	F	ATACTGGAGAAAGCCTACTAAAACCACGTAGAATT[A/C]ATTTTTTACCTTTCTAGGCTCATGCACAACTCCTA
Affx-1205093031	CM037938.1	1	89378766	A/G	A/G	F	AGAAGCCTCCTGAGAAGGTATGTCTGGACTGAATG[A/G]GTCCTGTTAGATATACATCAGGTGTTTGAAACCAT
Affx-1205093032	CM037938.1	1	89439798	C/G	C/G	F	GTGCGTAATCGCAAATTGTGTCAAGGACGGGCCAC[C/G]GGTCACCAACTTCATCTGGCATCAACTTCATTGTT
Affx-1205093033	CM037938.1	1	89445875	T/G	G/T	F	AAAAGTTTTGCTTCTACAGAATTTCTACTGTGATT[G/T]CATCAGACGTTTTCCAATCATGATTATTTAAACCA
Affx-1205093035	CM037938.1	1	89453470	T/C	C/T	F	TCTGTTATATTAGGATAAGCAGCAGCAGTACATTT[C/T]TCTGAGGGAAGGAAACAGGGGAGAACGCCCCCTCT
Affx-1205093036	CM037938.1	1	89462357	A/C	A/C	F	ATGTGCTTTCCCTTAATGCTAGCACACTGATAACC[A/C]AGGGTACCTATCGCTGGAGGCTCACAGACAGCTAT
Affx-1205093037	CM037938.1	1	89467310	A/G	G/A	F	AAACTCAATAACTCCGTTAGCAGAACACAAATAAA[A/G]AAAGTGATATTTACTCCATAACCTACAATTTGTTA
Affx-1205093039	CM037938.1	1	89514021	T/C	C/T	F	GTTGCCAAGGGGAGGGGGCTCTGTTATTTTCTTGC[C/T]TTTGAAGAGTCCATTAGAAGTTCATGAGATGGGGG
Affx-1205093043	CM037938.1	1	89677126	A/G	A/G	F	TGCTGACAACACAGGGAAATGTAGTCACCCACCTG[A/G]CAGGCAACACCCACCTCACTAATCTTCTGCGCTTG
Affx-1205093045	CM037938.1	1	89682215	A/G	G/A	F	CCGAGTAGTAAGGCGGAGGACATAGCAAACCCCGA[A/G]CAATGCATTATTAGTCGAGACCCATGGTACACAAT
Affx-1205093046	CM037938.1	1	89758301	T/G	T/G	F	TATTCCAAAACAGCAAATGTTTATTTTGATAGCAA[G/T]AACTTTATTTTGATACCCCTCCACCCCACCCCACA
Affx-1205093047	CM037938.1	1	89769126	C/G	G/C	F	CAAGGTAAGATATGCTTCGAAAAATGACAAAACAT[C/G]CTAGTTTTAAACAATTAAGTTTATGGTTTTAAATT
Affx-1205093048	CM037938.1	1	89774874	T/C	T/C	F	CTAGTAACCATGTGAAGTGCTGCTCACCACGGAAA[C/T]GGCCTCCTCTGTGACCAACTTCAGCACATCAATGA
Affx-1205093049	CM037938.1	1	89784966	A/C	C/A	F	GTCATCTATGAAAACCACATCTATAATTTCATATT[A/C]ATAAAGTCTGATTAAATAAATGTTTTACGAGACAA
Affx-1205093050	CM037938.1	1	89921559	A/G	G/A	F	ATTTCTTAATAAATATATGGCACTTTAAGCATTGT[A/G]CTACTCTATATTACTTGTGAAACAGTAGTGTACAA
Affx-1205093051	CM037938.1	1	89935395	T/G	T/G	F	CCTGTTATTGCAACAAAGGGATGAGGACAAATCAC[G/T]ATTTGAAAGAAAACATCAAATCATCAAATCCTTCA
Affx-98682119	CM037938.1	1	89992904	T/C	T/C	F	ACCAGAAAATACAGAATAAAAACACGATAACAGTA[C/T]AACATGACAATTGAAATTGATTGGTAAAACATGTG
Affx-87899425	CM037938.1	1	90001895	A/C	C/A	F	TTAGTGTTATGCACACTATATTAGTGTTATGCACA[A/C]TATTCCAACTATGCTTCGAGTAGAATTTATTTAAC
Affx-1205095171	CM037938.1	1	90130690	A/G	T/C	R	AATCCATTCAAATGTAGTTTGGTTTTCCTTGTGCA[A/G]CCTCCATATTAAACCCTCTGATTAAGCAATACACC
Affx-1205094316	CM037938.1	1	90218629	T/C	T/C	F	TTTGGCTGAGCGAAGACTTTGGCCACCCTGAAGAC[C/T]ATTAGTGCATTTTTGACGTTGACCAGGTCTGTGCG
Affx-88002022	CM037938.1	1	90234244	T/C	G/A	R	ACTGATGTAATTTCATAATAGAGATGGGGGAAAAG[C/T]GTATTATACAATAAATACTAATGCTCTACCATGAT
Affx-1205179061	CM037938.1	1	90375193	A/G	A/G	F	ATTTTAATTCACTGCTCTATCTTCCTGGTGTGTTG[A/G]CAGCACTAATTCTCCCTCTCACGTAAAAAAATGCC
Affx-88006808	CM037938.1	1	90389379	A/C	C/A	F	TTCACGTCTATGATTATGTCATAGCACAATCAAAC[A/C]CATTGTGAGGGAGGGCTGATACTGTTGAACATCTT
Affx-87930392	CM037938.1	1	90426642	A/C	A/C	F	AATATATTTTTTACGTTCAAATTCCTCTCCTGTGA[A/C]GCAGTGACGTCTGTCATACCATCAGCTTTCTTAAA
Affx-1205094319	CM037938.1	1	90490218	T/G	T/G	F	TAATTTGGTCATGTGTGTGACTTAATGGAAAGGAA[G/T]AGACCTTACACCTATTAATATGTGTATACTCCATG
Affx-1205094322	CM037938.1	1	90498508	T/G	T/G	F	CTCCATAAAACATCAAACCAGATGAGAGTGCAATA[G/T]ACATACATTTACGGTAGACCCACACAGTACTTAAT
Affx-1205094325	CM037938.1	1	90553552	A/G	A/G	F	ATTTCACACGTGGTATGCTCTTTATAATATGGCGA[A/G]ACATACTTCAAAAAAGTAGGATTACATTTTACCAA
Affx-1205094326	CM037938.1	1	90566158	T/G	G/T	F	ATGCTATCATACAGTTAATCTAGGACCTTTAAAAT[G/T]GTCTCTCAAAGATAAAGAGGAATAATTGTTGAATC
Affx-1205094327	CM037938.1	1	90576667	A/G	A/G	F	GAGAGCTCGGCTGAGTCGCGCAGGATGTCGTCCAC[A/G]CGCAGTCCATACGGCGCCACCACCACGTTGGCTCC
Affx-1205094329	CM037938.1	1	90586054	A/G	G/A	F	GCTAACTGATTCTTATAATCGTCGTCATCGGTATC[A/G]TTATCGTCATCATCATCATCCTCATCCACAGCAAC
Affx-1205094331	CM037938.1	1	90591308	T/C	T/C	F	AGGGAATAGGGTGCTATTTGGGATGCAGACTGAGT[C/T]TTTTACCTACCTGGTCATATTTGGATGCCTTCAGG
Affx-1205094336	CM037938.1	1	90610781	T/C	T/C	F	GACATGCACTAAGGAGTGTCTGTGTGTGTGTTTCT[C/T]CAGACTAAATCAATTTATCTCGAGCCCGTGGCTTC
Affx-93278060	CM037938.1	1	90618966	T/C	A/G	R	TCAGTAATACCACCTGTTCTTTCAGTCAAATTCAG[C/T]AATACAAATGTCTTGTCTATTTTCTATAGAATCTC
Affx-88101696	CM037938.1	1	90628348	A/C	G/T	R	ACGGTAGCTTCCCAACCTCCAGCCCTATATCATTC[A/C]CCCATAATGCTTTGTGAGACGCCTGGACGTCACAT
Affx-1205094342	CM037938.1	1	90628443	A/G	G/A	F	GGTCCTGTTGAGCGCCTAAGCGAGGCACTTACCCC[A/G]CCCAGGCACTCCAATATCTAGAGATATAAAAAGCA
Affx-1205094345	CM037938.1	1	90634956	T/C	T/C	F	TGCAACATATAAACAGCACATTTAACAAGGATATG[C/T]ATAACATTTGGGTTATGTTTAAAAGGTAACATAAA
Affx-87935502	CM037938.1	1	90842173	C/G	G/C	F	GTCACATTAAAGAGCAGTAAGCATGATGTGTAATG[C/G]CATGGAAACAATAGAAGAACTGGAAGTTTTGTAAC
Affx-98663175	CM037938.1	1	91078330	A/G	C/T	R	TAGTTAGTGCATCTTCGGTTTCATGAGGCCAAAAG[A/G]ACGTCATTAGCAAGCTAGATAAATGGTTCGCCAAT
Affx-99009684	CM037938.1	1	91078398	T/G	C/A	R	GTTGAAATATATGGCAAACTTAAAAGGAGGACACA[G/T]CATCTTGACATGACGCTCTGCTACCCTGTTAATAG
Affx-1205094664	CM037938.1	1	91084859	A/T	T/A	R	ATTGAATATTGCCAAATGCATTAATAACATTTTTT[A/T]GCCTATTCAATGCAAGCCTTGCTGTTAATAGATCG
Affx-1205094661	CM037938.1	1	91092630	A/C	G/T	R	AGATTCACTACATGGAACAGCAGACAGTCCCCCCC[A/C]CAAAAAAACTAAAGGAAATTTGTTCTTAAGTATCT
Affx-87872369	CM037938.1	1	91096822	A/T	T/A	R	CTCATTCGGCCACGTTGCCCGAAGCACTCAGTTTC[A/T]GCTTTACTTACTCTTAACTTTCTGGGTGGTGGTGG
Affx-1205094660	CM037938.1	1	91098736	C/G	G/C	R	TCTCTCTGTCAGCTGCGTCTATATTGAATTACTAT[C/G]CGTGTGTTCATGCGCACGTCCCTGGGTGTATGTAA
Affx-1205094658	CM037938.1	1	91106813	T/C	G/A	R	GTAGTAGTAGGCCAACCGATAACACCATGACGGAA[C/T]GCGATTGAAGTGATGATGCACCGCCGAGAACAGCT
Affx-1205091110	CM037938.1	1	91422582	T/C	T/C	F	CACCTGGCTGGCATGTAGGCCTACACTCCTCTAGG[C/T]ACGTAGCATTGGGGAGGAGCGCTGTATGCATCGAT
Affx-1205091111	CM037938.1	1	91427797	T/C	C/T	F	TCTTTTATTTTTCCCTTAATGGCAGTCTGTCCTGT[C/T]CCACCCCTAGCCAAGGGCACCCTGAGTGAGGACAC
Affx-1205091112	CM037938.1	1	91434914	A/G	A/G	F	GTCTACTGGTAAGTGAAGCAAGCTAGCTAGGAAAC[A/G]GATAGATCTGACCACACACGCATTGCTTGCTAATG
Affx-1205091113	CM037938.1	1	91457399	A/G	A/G	F	CTATACCTCTGGAAGCCCATCCCCTCAAGTGTTCT[A/G]CAAAGTCCTTTCACAGGGGTCAATACACTCTGCTG
Affx-1205091114	CM037938.1	1	91475245	C/G	G/C	F	AGATAATCATTACATTCACACTTATAGCAATACTT[C/G]TAATCATGAGACACAAAAAGCATGTTTTCTCCAGT
Affx-1205091119	CM037938.1	1	91537012	A/G	A/G	F	ACATTTTAATTTTATTAACCAGAGCTGTAGTGCAC[A/G]AGGCTCGAAGCAGAGCAGCAGCTCATGTGAGTGAC
Affx-1205091120	CM037938.1	1	91544294	A/C	A/C	F	GGGGACTTTGACTGCTTGAAACGACCTGGACACTT[A/C]AGGCCTACGTGCAACCTCGCCAAGGAGCTGTAGGT
Affx-1205091122	CM037938.1	1	91574162	T/C	T/C	F	TGAGCTCACTGTTCACTCTTTTTCATGGCTGTTGT[C/T]TTTTATTCCAGGTACCATGATGGTAAACCAGTGAA
Affx-87962946	CM037938.1	1	91593778	T/C	C/T	F	CATTTCTGTTGACCCATTTTCATCTATAGGGACAT[C/T]ATTCATGACTGTTGAGTTCAGGCCTGTAGGATATA
Affx-1205091126	CM037938.1	1	91598100	T/G	G/T	F	CGTTAAACTCACTTCCGTCTTTGGATTCAAATAAA[G/T]AAGGCATTTTTTTTGTACATTTCTGCTGTTTAGTG
Affx-88048068	CM037938.1	1	91956545	A/G	C/T	R	ACCTACAGTGTGTGTGTTATTGCTGGTGTTGAGGC[A/G]TAGTCGATGCTGGATATGCTAATCGTTAAGCTAAC
Affx-87999826	CM037938.1	1	92002874	T/C	T/C	F	GTATCTAAAAATATATTTTAAATGTATTTTGTTCC[C/T]GTATGAGTTAAGTACGCCAAAGAATATTCGCATGG
Affx-1205094232	CM037938.1	1	92028795	T/G	A/C	R	CTTGGGGAGAGGTTAGCATGGAGCTTGGCAGAGGA[G/T]GTGGGATTAAGTTTAGTGCAGATCATTAGGTTCTT
Affx-1205094231	CM037938.1	1	92035808	T/C	A/G	R	CACGACGGATGTCTGGAACACTGCATCCACGAAGA[C/T]GGAAGAACAGGCTAGAATCCCCGCTGGGAATACAC
Affx-1205094228	CM037938.1	1	92087696	T/G	C/A	R	TGGCTGGACAAGTGGAAGTGGTAGCTCATTTATTC[G/T]TTTGCTACTCTCACTGATCAAACATTTAGCATGCA
Affx-1205094227	CM037938.1	1	92105872	T/G	A/C	R	ACTGTCAAGTGTTGTTTTTGTTAGAGCATGTTAAA[G/T]AATTTTCCAACACATTTTATAAAGGATAAATTTAA
Affx-1205094226	CM037938.1	1	92111237	A/G	C/T	R	GCACCTCTTGGGTTATGGTTAATTATCAACCTGGT[A/G]CCAAAACCTCCTCTCTGATGCATGGAGAGGTGTAC
Affx-1205094221	CM037938.1	1	92183558	T/C	A/G	R	AACTGCAATCTTTTTTTGTAAGGTATGGGTTAATG[C/T]GACATTGTTGTCAGTTAGCCATTTTGACAACTAGC
Affx-1205094220	CM037938.1	1	92189128	C/G	G/C	R	AATCATCTCCTAGAGAGATATCAAATATTGAGGCG[C/G]CATATTCTAATGCATATCCTATAATAATGCACAAA
Affx-99004981	CM037938.1	1	92194666	A/C	C/A	F	TTCTACCATTTCACTCCAAGGTCAGACTTCCAGCC[A/C]GCACTCTAGTCACAAGACAACATTGAGGAATTGCC
Affx-93370395	CM037938.1	1	92194849	T/C	G/A	R	GCACTAAAATGGTTGGTTTCACTATGGTGGCTCTC[C/T]TGCAAATGATGAAAAAACGCAACATGACCCAGAAT
Affx-88101656	CM037938.1	1	92204882	A/C	T/G	R	CTCCCAGCAGATGTATGCGTGTTGGGCTTCTTTGG[A/C]GTGTGTGAGTATTTTACTGCATTTTAGAGAGAAAA
Affx-1205094214	CM037938.1	1	92324499	T/C	G/A	R	CATTTGACTTTCCCCAGATGTTGGTGCGTACGCAG[C/T]ATAACTGTGTGTGCGTGTCTGTGGGAGCATCCCAA
Affx-87858059	CM037938.1	1	92333687	A/C	G/T	R	ATTACAGAGTAATTCAGAGGGGAAGAGATGATGAA[A/C]GGAATCAGTCCAATCCAATGACAGGGTGATTAATC
Affx-1205094213	CM037938.1	1	92593189	A/C	T/G	R	TATTTCATGATATCATTCTCTATCACTCTCTCATT[A/C]TCCTCTTTGATGCGCCCTCTTCCTCAGCCTGTCAT
Affx-88123193	CM037938.1	1	92598744	T/G	T/G	F	ATCAGTTCTGAAGCACACTGCTCTGCACTAACAGC[G/T]GTTTCAATCTTTCAATGCCCTCTTATTCACTGCAT
Affx-1205094211	CM037938.1	1	92599528	C/G	G/C	R	TATGTACTGTAGTATGGAATAGGGTGCCATTTGGG[C/G]CACACCAAAGGGAAATTGTAGTTCTTGCGAGAACA
Affx-87948101	CM037938.1	1	92670254	T/G	A/C	R	TTGGAGCTCTCTGGAAGCTATTAGCTAGTGGGGAA[G/T]GCTGGGATGTGATGGAAGGGAACCACTGACCCCAC
Affx-1205093153	CM037938.1	1	92768570	T/G	A/C	R	TCTTTTTATTTTCATATTTTTCTCCCAGCTCCTGT[G/T]GTAAATGGAGTCCTGGTTTCTTCCCTCTTGAATAC
Affx-87991138	CM037938.1	1	92930035	T/C	G/A	R	ATTAGGTTTTAATATGCAGTGGCCCCAGAGCGGGA[C/T]GCAGTCTTTTCATGGAGTCGATAAGTCATTGATCT
Affx-1205093150	CM037938.1	1	93020599	T/C	G/A	R	AAGCACTCAATGGATACATGCCTGACATGGACCTT[C/T]TCCAAGTCTCAGAAACGTATGCCAACTTTTCTCCA
Affx-1205093148	CM037938.1	1	93039733	C/G	C/G	R	TAGACAGACCATCATATAGTTGATCATACTTACAG[C/G]CTAGCACAGGGGTGGGCAACATATCCATTCAATCT
Affx-1205093146	CM037938.1	1	93047928	A/G	T/C	R	AGGACTTTGCTTACTGAAGGCTATTTACTTGTTTC[A/G]AGGCTGCAAAAGCCAGAGGAGTATGAATGAGAGCT
Affx-87975419	CM037938.1	1	93055368	C/G	C/G	F	TATGCACATGCATGGCAATTGAGGCTACCAGACAT[C/G]ACTAGTACACTAAAATAAACTATGCTAAAAGCCTT
Affx-88122534	CM037938.1	1	93085587	A/G	G/A	F	GCTTTTAACGACTCTCACACAGTGGAATGAGACAC[A/G]TCAGGGGTGCAGTTGATCTTTAAAAAGACGTCAAT
Affx-1205093142	CM037938.1	1	93147246	T/C	G/A	R	TTTTAAATAAAGTGGTAAATTGCTGTGATTTCACA[C/T]TTCACATTGAATTGCCCGAAGCTATATTAGTTGTC
Affx-87863236	CM037938.1	1	93208508	C/G	G/C	F	TATTTGTATTGTAGATACTAGCATGTATACCTCGA[C/G]AGTCTACTGGGCCTGTATATTGTGTGTAAACCTTT
Affx-1205093139	CM037938.1	1	93231496	T/C	G/A	R	GGAAGCGACACCTCAGTCAAGATCAGTAGGCAAAA[C/T]GGCCACATGCATGGCACAGCAAGAGGATACTCAGG
Affx-99001199	CM037938.1	1	93232965	T/G	G/T	F	GAGCCTGGCGTAGCAGCATGTGACGGATCTGAAAG[G/T]TCCTTGCGAGCTTGTCCATAAGCGCCTTCTGTTTT
Affx-87880002	CM037938.1	1	93296545	T/G	G/T	F	ACCAACGGTTGATGACCTCATCCATGATCTGAATG[G/T]ACCAGTTGTGTTCTCCAAGCTAAATCTTAATGCTG
Affx-88011024	CM037938.1	1	93406379	C/G	G/C	F	ATTGACAGTGCGGCAGTAAAAAAAAAAAAAATGAA[C/G]AGTGAAAAAATACAAGTGAACGGGTAAAATGAACA
Affx-1205093138	CM037938.1	1	93448079	T/G	A/C	R	ATATTGTTTTACGCATCTTTTACATTGGCCTAATT[G/T]AAGTTTTATGGATAAAGTCAAACAATAAGAATACA
Affx-1205093137	CM037938.1	1	93453744	A/T	T/A	R	TCCGTGAACAGGACATTATGGACTTCTAGTCAGGG[A/T]GTGGTTTTTGCCTAGGGAACAAGAGGAACAAGGAG
Affx-87938754	CM037938.1	1	93471524	A/T	A/T	F	TCTCTCAGATGTGAAGTTTGTCATGCGGTTGATGC[A/T]AGAAAACATAGGCAGACTGTAAAATAAGGTGAATG
Affx-1205093133	CM037938.1	1	93492923	T/G	C/A	R	ACCTCTCTTTCCTCCTTTCCTCTTTCTCTCTAATA[G/T]ACTCTTTCCTTTGATATCCCCTCTTCTCTTATGTG
Affx-517037074	CM037938.1	1	93499791	T/C	C/T	F	TTACCACTGTAGCCCCTAACCATGTCACTGGGAGC[C/T]AGGAGGGGGGCTGGGGCTAGAGCTGGCCTAGGAGG
Affx-1205093132	CM037938.1	1	93505468	T/G	A/C	R	CACCGGTTTGCGTGTGTCAAGAACTGCAACGCTGC[G/T]GAATAAATGTTAGACACTCTACAAGGTGTCGAAAG
Affx-1205093131	CM037938.1	1	93511822	T/C	A/G	R	ACTCTAACCTGAGGGGAGCACAAGTTTCTTTTTTT[C/T]CCCCTTCAAAAGTAAAAAATTGGCACTTTACAGTT
Affx-1205093128	CM037938.1	1	93557869	T/C	G/A	R	ACCTCCCAATCTAGTCCTCCCTCACTTCCACGCTA[C/T]ACGCCTCATTGGAATTCACAAAATGGGGGACCGAT
Affx-1205178804	CM037938.1	1	93626835	C/G	G/C	R	CGAGACACTCCACTGCCATGTGATACAGCCAGCAG[C/G]TCTGCCTTATGCATGGCTCTCTTACAGACCTATGC
Affx-88009173	CM037938.1	1	93839361	T/C	T/C	F	TTTGTAATTCCTAATTACTTTCACTCGCAACATGG[C/T]TGCTGAATTGCTAGTGGTCAGAGGGTGTGACCCTG
Affx-1205093126	CM037938.1	1	93916905	A/G	C/T	R	ATAAATAGGCCTCCCTGATGGTTGTCTTTTCCTTC[A/G]TTGCCCATAGAGATAGAGAGTGATTTCCTGTGTGA
Affx-1205093125	CM037938.1	1	93923944	A/C	T/G	R	AGTGCAGTACATAAAGCCCCTCAAAAACACCAATA[A/C]CCACACAACACATAAGCATGCACAGTCGCACAAAC
Affx-1205093124	CM037938.1	1	93933524	T/C	G/A	R	AAAGAAACCCTACTCCCTCCCTTAATGTTTACTAC[C/T]GGGTGTTGTTACAGAGCCTGGGTTGGGTTCCCTGC
Affx-1205093123	CM037938.1	1	93943390	T/C	G/A	R	GTGCAAGTAGGCTTAGATTAGGCCTACTATTGAAA[C/T]AGATAAATGAGTCAGAAATGCATAATTTTCAGATC
Affx-93449051	CM037938.1	1	93944903	T/C	G/A	R	TTGACGTTGTCTTTCAACAATGTTTTTAATTTAAT[C/T]GCAATCCACACACGTCTCCAAGGCAGCGCCGCAGT
Affx-1205093122	CM037938.1	1	94061390	C/G	G/C	R	AGAGAGTGAAATGGAAAATAAAAGAGAGGGAGGAA[C/G]AAAGGAAAGGGGAATGAGAGAGTAAGAGTCTTTAT
Affx-87935276	CM037938.1	1	94088084	T/C	T/C	F	CATTTCCTGCTTAGTGGTGTTGCCTGCTTTGTCAT[C/T]TCCTTCGGGTGATTGAGAGCTCCAATGATGACCCT
Affx-1205093121	CM037938.1	1	94094234	A/C	T/G	R	TAGGCATAGCCTATGTAATGTATTTAGAATCACTG[A/C]AGCAAAGCAAATTGGATAGGCCTAATAAAGATTCT
Affx-1205093120	CM037938.1	1	94099709	C/G	G/C	R	AAGTTGGATTTAGTTTCTTTGTGTGACTTAGAGCA[C/G]ATCCTTTCTGAGACTGAGGACAGTAAGTAGGTAGT
Affx-1205093119	CM037938.1	1	94112301	T/C	G/A	R	ATAACATGCATATTTCTTCCCTTCAGCATACGTTT[C/T]AATAGAGGAAGGGCAACCATATGTTGTGATTGCAA
Affx-1205093118	CM037938.1	1	94119690	A/T	T/A	R	ACGACTATGACAGTAGTCGGCACACTACAATTCTT[A/T]TCAAAAACATGCCAGCAGTTAGTTCATGCAGTTTT
Affx-1205093117	CM037938.1	1	94139720	T/G	A/C	R	TGCCTCTGAACCACCTTACCCCTGGGTTCCCCTGA[G/T]CATAGATCTAGGATGGTACACAATCCCAATTGAAC
Affx-1205093116	CM037938.1	1	94144903	T/C	A/G	R	TGGAATGGATCTGGAGGATCCATCTAAATAGTTCC[C/T]TTCTGGGGGGATGGATCGGACCATTGTGAAGCAGA
Affx-87857807	CM037938.1	1	94152376	A/C	C/A	F	CTTTCCAAGAGGTGTAGGCTATGTGCCTGTAGACC[A/C]TTTTCCAGTATACAACACACTGATGTCATGGAAAG
Affx-1205093113	CM037938.1	1	94180752	T/C	A/G	R	GAGTCTCGATTTGGAGAGGAGCACCAGTCAAGATG[C/T]CGAGAAGAGAGAAGGAAGCTGAGCAGCAGAGATGA
Affx-87866134	CM037938.1	1	94191600	T/G	C/A	R	CAATAAAACACATCTTACAGTATGACATTTTGTCA[G/T]GGCTTATAAATTAAACCGGCCAACTAGTAGTGTTG
Affx-1205093111	CM037938.1	1	94195686	T/C	G/A	R	AGACCCATGACAGTCATATCAGATCCAACCCAGAC[C/T]AGTGACAATATTTAGTATTCTGGATCCAGGCCCGC
Affx-1205093110	CM037938.1	1	94201949	T/C	G/A	R	TGCAAATTGTACACATGACGAGTGCACTGAGAGTG[C/T]GTGACTGTCACTTACACGCTTGGCGGAGGCCAATA
Affx-1205093107	CM037938.1	1	94220703	T/G	A/C	R	GGTTTGAAATGATCTCACTATTTGAATAATATCAT[G/T]AATTTTTTGGATATCCGGATATTCGAAATACATGT
Affx-1205093106	CM037938.1	1	94227671	T/G	A/C	R	ATAAAGCACAACTCGCACGTGTGTCTATACTTGAC[G/T]TTTGACTATTTTAATAAATGCTGGCACTATAGAGC
Affx-1205093105	CM037938.1	1	94233970	T/C	A/G	R	CTTATTTATAATGACAGCTCTGGGGAATGACTCAT[C/T]ACCATACTGTAGGTAGGAGAAGACAGGACAGACAC
Affx-1205093104	CM037938.1	1	94241333	T/C	G/A	R	AGTTTATGTCTCATTGATTCCAGAGGCTTTTTTTT[C/T]CGCAAGGGGCGAGAGAGTTTTATACCACAGTGGGG
Affx-1205093103	CM037938.1	1	94249214	A/G	C/T	R	GAGACAATAGACATTGGATAACTGGACATTCCGTA[A/G]AGACTCCGGTACAGGCAGTAACATGCAGACATCTC
Affx-93369076	CM037938.1	1	94257413	T/G	C/A	R	CTAGCCTAGTGATGAAGGTCAAGAGCCCACTCAGT[G/T]GACTGGGCTTATGAGCGCTCTAAGCTTCCAACACC
Affx-1205093097	CM037938.1	1	94325788	A/C	G/T	R	TAAATGTTCTTTAGCTATTCCTGGTATTTCACAAG[A/C]AGAGGAATGGCCTATTGCGGAGAGGCTTGCGTAGC
Affx-1205093096	CM037938.1	1	94333376	A/C	T/G	R	TACAGGGAAATGGCTGATTTCCTCAGAACCTTATC[A/C]GAGTATGTGATCTCCTCTTATATGAAACCCCAGTT
Affx-1205093093	CM037938.1	1	94371161	C/G	C/G	R	TCTAAACACTTTAAAAGGATAGTTCAGTTATTAAT[C/G]TGTGCTGAAAGTGCTATATATTGAACAACTTGACT
Affx-1205093090	CM037938.1	1	94379001	T/C	G/A	R	GTGACACGGAACTGCATAGATGAACACGTCAACAA[C/T]GTGTCATATGTCATAGGAGAATCTCCTGGAGAATT
Affx-1205093087	CM037938.1	1	94386395	A/G	C/T	R	ATTTACCAATGTTACATACCGTATCTCAAAGATAC[A/G]AAACTGTGCTACAAGAAGTCAACATTTTTTATTTG
Affx-1205093084	CM037938.1	1	94396449	T/C	A/G	R	AAATTGAGTCATAAAACAACAAGAATGCATTGGGG[C/T]GGTGTATGATTCATATTCTGACCACTGGATCAACT
Affx-1205093080	CM037938.1	1	94406621	A/C	G/T	R	CTGATATTATGACAGTTTACCAAACCAGCACTAAC[A/C]CAAATGATTCAACTGATTGACTGATGATTAAGCTG
Affx-1205093077	CM037938.1	1	94421452	A/G	C/T	R	TTTGTGTGGTCCCTGATAAGGGGGAGAAAATAATT[A/G]AGGGGGGAGACTGCGCTAAAATAACAGGACTAGTT
Affx-87957709	CM037938.1	1	94468085	T/C	G/A	R	TTCTCAGAAAGGATAAACTCCTTTCCCCTTTGTCC[C/T]ATCCTTCCCATCCCGAATAAATTAGTGTAGGAGGG
Affx-88014189	CM037938.1	1	94560552	T/G	G/T	F	AGTCAATAAAAACTGATACAGAGATTATATTGGGA[G/T]TTATGAGGTGTTGCAGCAGATTATATTTTCAACAC
Affx-1205095123	CM037938.1	1	94583982	T/C	T/C	F	ATGAAACAATTGCCTGTTTTCTTAATTACCTTTCA[C/T]ATTAACGTCAGTCATTAATCGAAAAAGTGCTACTT
Affx-1205095125	CM037938.1	1	94591482	A/T	T/A	F	TGATGCTGTACAGGCAAAATTGTTCGAGAATTTTT[A/T]GAATTGTTGGTTCTAGAATTACAATTGAGGAGTCT
Affx-1205095126	CM037938.1	1	94602485	C/G	G/C	F	CAGTTCCGAGTGGGGAAAACATTGAGAAATGTGAA[C/G]TATAAGGGCATCTGTGATACAGAAGACTAAAATAC
Affx-1205095128	CM037938.1	1	94611531	A/C	C/A	F	TATTCTTAATTTCTTAACTAATTCATTAACATTAT[A/C]ATTTTTTTAAATATAGCTTTTCCTCAATCCAGATA
Affx-1205095129	CM037938.1	1	94634766	A/C	C/A	F	TCCACTCTATGGCTTTAGTCTTGAGCAATATCTGC[A/C]AAGAGCAACATTCTGTGAATGATATTGATTTCTGC
Affx-1205095130	CM037938.1	1	94643242	T/G	G/T	F	TGTCGTTGTTTTTGTGTGGCTAACGTTCTATGTTT[G/T]GTATCGGAGTGGAATAGTGTGTCCACACGGAAAGG
Affx-1205095132	CM037938.1	1	94652139	A/T	A/T	F	GATTTCATTTTGCTGTAGGCACAATTATAAAAAAA[A/T]TTACAGTCGTGCTATTTTCTACTGACTAATCCACG
Affx-1205093666	CM037938.1	1	94737144	T/G	A/C	R	TAGCAATTGTTATTGTTTAACTCAACATTAACTGT[G/T]TGAAATATTTATTTAGTTGATCCAAAGGACGAATT
Affx-1205093665	CM037938.1	1	94742856	T/G	C/A	R	TGGTTGCTTTCCTCAGCGGGAAAAGACACTGAAGG[G/T]TTAGGTGTCAATCACTCACAACTTATATAGACAGT
Affx-93383072	CM037938.1	1	94758065	T/G	T/G	F	ATAAGGTCACAAAACCAATGTCGCCCAAACATGAC[G/T]GCTGTCACAATTGTGTTATCTCATCCAACTGCAAG
Affx-87872272	CM037938.1	1	94834832	T/C	C/T	F	ACCTAGATTAAGTGTATTCCCTGATTCCGCAAATC[C/T]TATCAGAAGTTATTTCTCTGCCTCCCTTGTTGAGA
Affx-98680551	CM037938.1	1	94952739	T/C	C/T	F	TTTGTTGGGTGCGTTCAATGTTTGTCTGAAATCAG[C/T]ATAAAAGATCAACAAAAAAGGCAAACATCGACTTT
Affx-1205093660	CM037938.1	1	94956739	A/C	G/T	R	CTTCAACCACTTACACTTTCAATTCCTCCTTAGCT[A/C]ATTTTGTTTGTGCAAAACTGCACTGGCACCAGACA
Affx-87890003	CM037938.1	1	94974881	T/C	C/T	F	AGCTAAAATTCTTCAACAAAGCGCGAGTCGTGTAG[C/T]ACGGGCCCTTCGACGTTTTGATCGCAGTGGCTAGC
Affx-1205093659	CM037938.1	1	95004224	T/G	C/A	R	ACCTGGGTTTCATTGGCGATGCGTGGAGGCACCTC[G/T]ATACCAATCTTTGTTAGCTCCCGGTCCTTGTAGTG
Affx-1205093656	CM037938.1	1	95026225	T/C	A/G	R	TCTCCATGTCTGTCTGCCTGCCCCACAGGCTTGCC[C/T]GGAAAGAACCAATGAGAACAGGCACAATGGATTCT
Affx-1205093655	CM037938.1	1	95036223	T/C	G/A	R	CCGCTGTGTCTTTAATCCCTGTGTCATTATAGACC[C/T]GTTTTGCCTCAGAGCTGAATCAGATCAATTAAATG
Affx-1205093653	CM037938.1	1	95045965	T/C	G/A	R	TAAAGTGAACAGGTAGAACTCACACAAACTGTGTA[C/T]ATTTGCAAAATCATCTTTTCCAGATCATTGCAAAG
Affx-88117248	CM037938.1	1	95052349	T/C	T/C	F	GGTAGCTAGTAGTGCTGCCTGCCTGATGCCAATTA[C/T]CGCTGTTGTTTTACTGTAAGTGATGCCTAACAGGC
Affx-1205178915	CM037938.1	1	95072145	T/G	A/C	R	ACCTATGTCAGGTCTAAGAGGGCCATCCTACTTTC[G/T]GATAGAGCAAGCAGTGATGAGTGCCAAACCTGTCC
Affx-1205093652	CM037938.1	1	95087317	A/T	A/T	R	AGTCCCTCAGTCTCCTCTCATTGCACTGCACAGAC[A/T]GGAATGGTCTTGTGGGGTTTTATGTCCATTTAGCC
Affx-1205093651	CM037938.1	1	95097119	A/G	C/T	R	TCAGTCACATACTAATTTCTCTCTGTTACAATGTG[A/G]GATGTACTTATGCTTGATCCAGTAATGTAGTACGG
Affx-1205093648	CM037938.1	1	95123000	A/G	T/C	R	GGACAGACTTCCTGTATAGATTTAATGGCGTTTAA[A/G]ACAACCGTGAACTCGTCAGTAATCTTCAGGTCGCA
Affx-98999744	CM037938.1	1	95144413	T/G	G/T	F	ACTGGTTAATACACTGTGCAGAATGGAACTCAAAG[G/T]ACTCTGTTTATTCACTGTGTGTGCAGTGGGATTGT
Affx-1205093645	CM037938.1	1	95150390	A/T	T/A	R	TTCCAGGAATTCCTGATTCCCCAGACTGACCTTAA[A/T]CTATTTGTGGGGGGGGCTGTTACAATAACGACCTG
Affx-1205093644	CM037938.1	1	95156293	A/T	A/T	R	CCATAGCAAAAATCTATTGACTTATACTTGGCAAT[A/T]CTTCAGACTTTGGGTCTTCTACTTTTTACCAACTC
Affx-87934485	CM037938.1	1	95247160	A/G	C/T	R	CCTAATAGTCATCTACTGGGTTATGGTTTATGCTA[A/G]TCATACAACTCTGCAGATAGCTCTGAATATGGATA
Affx-88062595	CM037938.1	1	95285061	A/C	G/T	R	ACCTGTGGGTGTAAAGAGAGTGGGCAATAATTACA[A/C]ATTGTTGGTCCTCGTTTGCCAAAAACTCTTCATGT
Affx-98679971	CM037938.1	1	95345096	T/C	A/G	R	AAACAACTTTGGCCCATGCAATCAGAAAAGCAGCT[C/T]CTTGCACTGTCTGAAACAACGGAAATGTATATCTC
Affx-1205093641	CM037938.1	1	95353303	A/T	T/A	R	GCTGCCAAAGGTGCTTCCATTAAGTGTTAACTATG[A/T]GGTGTGAATACAAACAAGACATCTTGTTTATTTTT
Affx-1205093639	CM037938.1	1	95361159	A/C	G/T	R	CGCCATTTTGTATAGGGATTTTCTGTAACACCCAG[A/C]ATGGAAACATAGTGATCACATCTGGCATACAAACT
Affx-1205093637	CM037938.1	1	95400028	A/G	T/C	R	CTCTTCAAATTTAGAATTTCTAACTAAATCTTTAC[A/G]CATTAGCCCTTTAACAGCCTGCCAAGAACTGTGAT
Affx-98680626	CM037938.1	1	95440562	A/G	C/T	R	TAGACTACTGCGACTCCGGGACTGTCAGGAGAACC[A/G]TACGGTCATCTCAGAACGTTGCAATGGTGTTCTTC
Affx-1205093636	CM037938.1	1	95441226	T/C	G/A	R	CCCAAATACTCCACTCCCACCGTTACCTTATCTGA[C/T]ATCAGCACCATCAGGTCCAGGGATAGAGGGGCATT
Affx-1205093634	CM037938.1	1	95481906	A/C	T/G	R	TCCGTTTCAGAAATAATGATCTGAGCTCTCATTCC[A/C]CCTGGTGGTTAAATAGATGAACTGACCACGCATGG
Affx-93290122	CM037938.1	1	95572742	T/C	T/C	F	AGTGACAGCGAGGGTCCAGCCAGCATCAGGAACAG[C/T]CCAGAGAACCGGCTGCTGATTAAGAGGATGATGAT
Affx-1205093629	CM037938.1	1	95586585	T/C	A/G	R	TACTGTGCATGTTTTTTTATGTCTGTGAACTCCAG[C/T]ATTAATTCAAATATTTTCAATTTATTTTGTATTTT
Affx-1205093628	CM037938.1	1	95612119	A/T	A/T	R	CATAAAAGTGTCACATTCGATAATCTAACTAAACA[A/T]TGTATTTTAAAAATATATCATACTAATTAAATTTT
Affx-1205093627	CM037938.1	1	95791397	A/G	C/T	R	GTGATGATTCTAAACCGTTTGAGCCGTTGAATTAC[A/G]CGTTCCACATGAACCCTCACGTTAGTTATCCGTCT
Affx-1205093626	CM037938.1	1	95804553	T/G	C/A	R	TTGCAACAAAACTCAGGCAAAAGTTCAGGCATATT[G/T]AAAGTACAATTCTAAAAAGTGTATATTTTCCATAG
Affx-1205093624	CM037938.1	1	95853653	T/C	G/A	R	AGGCAGGTCAGTTATTCCTACAACACCAGCCACAG[C/T]GCTGGAGAGAAACTGTTGAGACTTGTGTTGTTGCG
Affx-1205093718	CM037938.1	1	96031514	A/C	C/A	F	TGTGAAGTAACATGTTATAGATTTCTCATTTCTAA[A/C]TTGATATGTGCTTTACTTGGACAGAATGTTACAGG
Affx-1205093719	CM037938.1	1	96077877	A/C	A/C	F	ACAGTCCCCTTTGCGCAGTAAAGTGTTCTTTTGTC[A/C]GTTTTTTTGTACTGTTTTTATTGCTAGTTTGAGTT
Affx-1205093720	CM037938.1	1	96102367	T/G	G/T	F	AATACCATACAAAATGTAAACGTGCTTAAACGTTG[G/T]TTTTTTTGCCTTTTACTGTCGTCTTACTGTTATTG
Affx-517057438	CM037938.1	1	96203191	A/G	G/A	F	CGCGTGCGCACACCTGTTGGCATCTGATTTGGGGG[A/G]AAAATAAATGAAAAAATTGCCATCTATTTTTTCTA
Affx-1205093723	CM037938.1	1	96468486	A/T	A/T	F	ACCTCACGTAGACATAGTAAGCATCTGAAAGTGAT[A/T]TGGGGTTTTGCGTAGCACAATAGTTCTTTGGAGTG
Affx-1205093725	CM037938.1	1	96481742	A/G	G/A	F	GTGGCATTGGATCTGGTTTCTGCCCCTGCATCCCA[A/G]GCGTTCGTGGAGAGAATACTTTCAGTCTGTGGACA
Affx-1205093727	CM037938.1	1	96651213	A/C	A/C	F	CACTGAGGCCCTAGGTGTCTCATTCTTACAGGAAA[A/C]ACAAGCTTCAAAACATTATTGTTAACATTGTTTTT
Affx-1205093728	CM037938.1	1	96736644	T/G	G/T	F	GTTGTTCCACTCGTTTCTTGTCGCGTATTTTATTT[G/T]GGGCTAGAAAAACTAGCTAACGCTACAACCCACAT
Affx-87902395	CM037938.1	1	96772799	A/T	A/T	F	CATTACCAATCATACTTCTAGCCATGTAGAACCTA[A/T]GGTTAATTTAGAAGACAACGCACAAAGAGATGCCT
Affx-1205093729	CM037938.1	1	96819702	T/C	T/C	F	AAACCTATTCGTGCAGTAGTGACTATGTAGAGACT[C/T]GTAGGGATTGTGTTGTGAATGTGTAGTTTATGCAC
Affx-1205093730	CM037938.1	1	96847708	C/G	C/G	F	TAATTTAACTTAACTGAATTGAATTTAAATGAACT[C/G]AACTCAACTCAACTGTATTGATTAAAATGTTGGAA
Affx-1205093731	CM037938.1	1	96874165	A/G	G/A	F	TTATCAAACCATTTCCACTAATGTCATTTTCAAAC[A/G]AAGAGAAAAAAATCACAGCTAGCTGAATGGAGATA
Affx-1205093732	CM037938.1	1	96904765	A/G	G/A	F	TTTACGGTAAATGACGCTTGTGCGTGTGACATTCC[A/G]ACTCTGATGAGATCCGGCTGTTCATTCAGCAGCAC
Affx-93358129	CM037938.1	1	96925187	T/C	G/A	R	CTGGAAAGGCGGTACGGCCTGACCAGACACACCCC[C/T]GACTGTAGAGAGGAAGAAGAGTCTACTGACACCTT
Affx-1205093733	CM037938.1	1	96953659	A/G	G/A	F	GGTTGGAGCTAGGGTTAAGGTTGGTGCTAGGGTTA[A/G]GTTTGGAGCTAGGGTTATGCTTAGAGCTAGGGTTA
Affx-1205093748	CM037938.1	1	97143251	A/C	G/T	R	ATGTTGTTTTTTTAAAGCTCTGAGCGAGAACAGTG[A/C]CCTTCATGGAGTTAGTCCTGGGATGTGCAGTCTGC
Affx-1205093746	CM037938.1	1	97150052	A/G	C/T	R	TGAACATGACACTACCAGCACCCATTGTTCTAGCT[A/G]AGCTAGCCTTGGTACCTGACTGTTCTTGCATTCAA
Affx-98990101	CM037938.1	1	97155249	A/G	C/T	R	ACCAAGAGATCCAGAGGCATCGGTCTACTCAGGCT[A/G]CTCCTCTCCTGGGCTCATGTCGTGGACAAACCCCT
Affx-1205093745	CM037938.1	1	97159601	A/G	T/C	R	CTTTCCCTGAAACGGTTTCTGTCTGCCATGTGCCC[A/G]GTACAGTTGAAACCGGGATTCATCCGAGAAGAGCA
Affx-1205093744	CM037938.1	1	97183412	A/C	T/G	R	TAAAGCTCTAGGTCTTACCTCAGAACCCTAGCTGG[A/C]CTCTAGCCTGCCAGAGAAGAATACGACGGGGTATG
Affx-1205093740	CM037938.1	1	97214342	T/C	A/G	R	TGCTTATACCTTTCCACATCTTGTAGATTTACAAA[C/T]ATCGAAGGGTTAGAGCTGGGACCGGGGAGAAGGCA
Affx-1205093738	CM037938.1	1	97219308	T/C	A/G	R	TTCCTCTCTCATCCAGTCGAATTACCATGTTTCTG[C/T]GCAGAACGAGGTTGAATATTTTCTTAATGAAAACT
Affx-93434028	CM037938.1	1	97355363	T/C	G/A	R	GAGAGCATCACAGATGAGGAGCTGCGCAGCATGAT[C/T]GATGAGTTCGATACAGACGGAGATGGAGAGAGTGA
Affx-93451720	CM037938.1	1	97381039	T/C	G/A	R	AGTTAGTATACAGCGCAATAAAAATACACTCTTGA[C/T]GTAACACAGCAATACAAACAAGTCCTGTCTCATAT
Affx-98677673	CM037938.1	1	97411066	T/G	C/A	R	ATTATAGTAGATTTGCACCTTAGATTGCAGTTGGT[G/T]TCCAAGCCTGTTTTTGTATTTAAGGGAAGTAGTTT
Affx-1205093205	CM037938.1	1	97532592	C/G	C/G	R	GTGTGTGCATTATGTGCTTGTCTGTTGGTACTGAC[C/G]CCCCCTCTCCCCTCTCCTCTCCCACAGCAAACCCT
Affx-93319600	CM037938.1	1	97564055	A/G	G/A	F	ATAGACATAGAGTAGTATCCTGGATATGGACCCTG[A/G]CCAGCTGGACTTTCCTCATTCTAATCAGGGATGTG
Affx-1205178816	CM037938.1	1	97580814	A/G	T/C	R	AGTAGATCAATGTAGAAAAGTAAAAGAACAACATT[A/G]GTCTAAATGGATTCAAGGCTGCAGTTTGGACCTGT
Affx-1205093202	CM037938.1	1	97675965	A/C	G/T	R	CTACAGTAGAGTACATCAAAATACTGCTATAGTAC[A/C]TCAAATACTATTGGTATAGTACGTCAGGATACTAG
Affx-1205093200	CM037938.1	1	97683172	C/G	G/C	R	ATGTCATACTAACTGGATTTGCTTATAGAATAATA[C/G]GAAATGCTCTGAGACCAGGTTGGAGTGACAGAGTG
Affx-1205178815	CM037938.1	1	97684362	A/C	T/G	R	TACAGGTAGAAGATGGTTGTGTGTGTGTTACCTGT[A/C]GAGCAGGCTGGTCTATGGAGGACACCACCTCAGCA
Affx-87927934	CM037938.1	1	97858264	A/G	T/C	R	ACACAGCGCTATGGAGGAACAGGTGTGATGGTGAT[A/G]ATTAGAGTTGATGTGTCTCCCCAGCTCTGCAGCTG
Affx-1205093751	CM037938.1	1	97960590	A/G	T/C	R	GCATGTGACATTAAAACTTGAAACTTGAGCTCCGT[A/G]AGACATTCATAGCGATGGGGGCAGACTTTTTGATC
Affx-93332703	CM037938.1	1	98059618	A/G	T/C	R	CCACAATCCCTGGTTTTCAGGTTATGCTATAAAAT[A/G]CACTTGTAATTCACTAGCAACACACATATCAACTT
Affx-93453169	CM037938.1	1	98064378	T/G	A/C	R	TTGAGATAACTGAGATGCAATAATATTTTTTGCCA[G/T]GGTTGTGGTCAATTGTATTTTAATTTCAGTCAATT
Affx-1205093191	CM037938.1	1	98080931	A/T	T/A	R	CCCTAGCATATATACGTACCCCTAACCCTTTCTAC[A/T]CCCCCATAAATCTGTCCACTCATATTTTCTCTCCC
Affx-88092268	CM037938.1	1	98098523	T/C	G/A	R	TTTAACAACTCAAATACTGGTTTGTTCACAATCCA[C/T]ACCGGCGAAGATGACATCAGGCTGATTCACAAAGT
Affx-98996987	CM037938.1	1	98132399	A/C	G/T	R	GCTCTACCGCTGTCTCGGCTCTCTAACGCCTACAC[A/C]CACACCCACGGTACACACACACAAAAATAAACATG
Affx-1205093188	CM037938.1	1	98133306	A/T	T/A	R	CACACAGCCAGGTAGTAAACCAGCCAATCAAATGC[A/T]TGTTTTGTTTTCCCCTTTTCAACACTGTGTGGCAC
Affx-1205093185	CM037938.1	1	98139246	T/C	A/G	R	AGTGTGTCCTGTGACAGTCTAGAGCTACAGCGTCG[C/T]TACCCCCATCTCCCTCTCCCCCCATCCGTCTGCCA
Affx-98661298	CM037938.1	1	98139270	T/C	A/G	R	AATCTCCACCCCTTTGTCTCCCCCAGTGTGTCCTG[C/T]GACAGTCTAGAGCTACAGCGTCGTTACCCCCATCT
Affx-1205093182	CM037938.1	1	98149536	C/G	G/C	R	GGCTTCAAAACCCACTCAGCGTTATCTGAGAGACA[C/G]AGAGAGATGCTAGGTCAAACAGTCTACATCAATTA
Affx-1205093179	CM037938.1	1	98157991	T/G	C/A	R	GATGATCGAGTTGGAGTCATGCATATCCGGCAATA[G/T]GTGTCAGTCAATTGGTAATATTCATTTTTGTCTTC
Affx-1205093173	CM037938.1	1	98171441	T/G	C/A	R	GAATACACAGATAATATAATACTTATTAGAGAATT[G/T]TTAAACCATTCTCCTACTTGTTTTTTAATGTGTCT
Affx-93393784	CM037938.1	1	98174262	A/G	C/T	R	TGGAACGGCAGCCTGTGTCTCAGAGTTGAGGTCAT[A/G]GCCTGCCAACTGACCAGTGAGTACAGTACAATGCA
Affx-93457505	CM037938.1	1	98179629	A/G	T/C	R	CATCCTCACTCACCAATAGGATGTTAGTGGAACAG[A/G]TGAGTAGACCAAGAGAGAACAGACCTTTTACTGGG
Affx-1205093168	CM037938.1	1	98188008	A/G	T/C	R	TTGGACTCTGACCTGGTTTATGAACTCTCGCTTGT[A/G]CCCAACCTACCTTTTGCTATAATAAATATCGGAGC
Affx-1205093166	CM037938.1	1	98206587	T/C	G/A	R	GCACTCTTTATTTGGGCAGAAGCACAACAAATGGA[C/T]GCAACAGCGTCAAACCTCCAGCCAAAATGCAAAAA
Affx-98677884	CM037938.1	1	98213438	C/G	C/G	R	GTGTTGCGTGTTTAGTGAGAATGTATTTAGCAAGT[C/G]TGTTGGTGTGTGACAGTGTGTGTTGATGTGTTTAG
Affx-1205093161	CM037938.1	1	98222932	T/C	A/G	R	TGGGAGCAACAACAGTGAACCAACATTTCCAAACC[C/T]CTCCTTCTTCCCCTCAGCTCCAGAGGTGATTGGCC
Affx-1205093158	CM037938.1	1	98230125	A/T	A/T	R	GATGAATCGGTCCAGTTGGATATGTTTGGTCTTAC[A/T]GCTGATAGTTTTTATTTCTTTGTTTTCTTTCTTCC
Affx-88085239	CM037938.1	1	98516776	A/G	G/A	F	TGACAGAAATGGGGAGTTTCACCAACTGTCTTCAC[A/G]TGAGATGTCACTCTACAGATGTCACTCTACAGATG
Affx-1205096121	CM037938.1	1	98538075	T/C	A/G	R	AATAAGCAGAGTGCTCAATGAGTAACATGAAACAG[C/T]TATTCATATTCAGCCAAAGAGAGCGATGTCTTTGC
Affx-1205096120	CM037938.1	1	98589895	C/G	C/G	R	AGGCATTCTGTGGACAAATGCCTCAATTCCTCCTG[C/G]GCTAGAACAGGAGCAGTAACCTGAGAGGATTGATC
Affx-1205096118	CM037938.1	1	98642835	T/C	G/A	R	AGCAAACGATTTTATGAGATTGTGATGATTATAAA[C/T]TTTAATACTAACATCACAAATCTGAGGTAAAAAGG
Affx-1205096114	CM037938.1	1	98713084	A/G	T/C	R	GTTCAAACTCTTGCTTTTGAACTTGATCCACAGAT[A/G]CTAAATGTTTAGCTCCTCCCACCATGACATTGATA
Affx-87962028	CM037938.1	1	98797592	A/G	C/T	R	TTAGTAGAAAAGACACTGTGCTTTGGTTAATGGAC[A/G]GATAGTCATTTAAAGCTGTTGCCGTGGTAGCATCA
Affx-1205096111	CM037938.1	1	98802144	T/G	C/A	R	CCATCAGTCCAGTAAAAAAAAGTAATACAACAAAT[G/T]ATCTATTATTCGTGTGATCATTTACCCAATTTTTT
Affx-93325114	CM037938.1	1	98827593	T/G	G/T	F	GTATCTATGTAAATGAGATACGGAGACAAAGAAAT[G/T]TAATTGAGTAACTGAAGTGTGCTGGAAACTTTCGA
Affx-1205096107	CM037938.1	1	98902648	T/C	G/A	R	GTCTCTTTCCCTCAGGGAGGGGCTCTGATTGGTCA[C/T]CTCTAACACCTTCTCTCTTTCTCTCCTTCTCTTTC
Affx-1205096100	CM037938.1	1	98949073	T/G	C/A	R	TCCAGAAACCCATGAGGATATATTTCAATTGAAAA[G/T]GAAATATTATGTGTTATTCATACTTATGCAAAACT
Affx-1205096098	CM037938.1	1	98954155	T/G	A/C	R	AGTACACCAATTGCTATCACCTTGCTGACAGTATA[G/T]CCCAGTGCTGATGCCATGGCCAGCACAAGTCTTTC
Affx-1205096096	CM037938.1	1	98960094	A/G	C/T	R	TGTTTGGGTTCCATGTTGAAGCCTCTGTAGAAAGG[A/G]TTCCACATGAAACCCAAAAAGTGTTCAACCTGGAT
Affx-1205096090	CM037938.1	1	99658192	T/G	C/A	R	GGTATCTTACCTAAACAAACCTGATTCTTCAACAA[G/T]AATTTAGGCTATGTTATACAGGCAGCCCAATTCTG
Affx-1205096084	CM037938.1	1	99668628	A/C	G/T	R	TCACAGATAGTGGTTAGTTCGTTAGCTAGTTAAGT[A/C]CTCAACATTTCACAGCGATTGCCAGGGTCTAGTAA
Affx-1205096081	CM037938.1	1	99675116	T/G	A/C	R	AGTGTTGTCAGGGGATGAAGATACCTTTAATGTCT[G/T]AAGGTGTGTTAGTACAGTACATGTGTGAGTGGTAA
Affx-1205096074	CM037938.1	1	99731209	A/T	A/T	R	CTTGGGAGCAGAATTACTTTTGCTTCACTCCAGGC[A/T]TGAGGGCACTAGTTTGTGATTTTTTTAGGTCGTTT
Affx-1205096070	CM037938.1	1	99753667	T/C	A/G	R	AACATTATGACTAGGGACCCGAGCTGCAGCCAAGG[C/T]TCGATTAGTTGTAACCCCGAAACGCAACACGAGGT
Affx-1205096068	CM037938.1	1	99792145	A/G	C/T	R	CACTGAAAGGCACTAAATGCTACCATGCTATCATA[A/G]TGCTATCTGAGATCCTTGGGATGTCCACACCCCCT
Affx-1205096065	CM037938.1	1	99882996	A/G	T/C	R	TGGTCTGTGAATATATCTATGAAGTTGAAGAAAGA[A/G]AAGGAGCCAGACTGCAAAATCAGTGCTCCTGTGTT
Affx-1205096063	CM037938.1	1	99891959	A/G	T/C	R	ACCCCAACTCATACCCAAAACAGTCACTCTCCCCC[A/G]TGTTTTACTCTTCTCAAGGCGTATCTATACAGAGC
Affx-93276348	CM037938.1	1	99961828	A/G	A/G	F	CGCAACACAATTTACTCGTCTTTTTCAGTGAAAGT[A/G]AAACATTTTCCAAATTAATAAAAAAATAAGAAAGA
Affx-1205096058	CM037938.1	1	99970700	T/G	C/A	R	ATGCACCCCCGCAAGGCGATACTGAAAATCATACC[G/T]TTGGAATTTCGAAATACCCCAGTAAACGGTATATC
Affx-1205096057	CM037938.1	1	99989130	C/G	C/G	R	GATGTAGCCTAGAGGCTATCCTGTTGGCACTTGTG[C/G]TAAACTTCCAACTTATTATCTAGTAAATGAAACAT
Affx-93406450	CM037938.1	1	99996286	T/G	G/T	F	TCATGAATGTGTGGTTGTTGCAACTGAGGGACATT[G/T]GTGTGAAAAGACCCTCCAACTGAATCTTGTCCTTG
Affx-1205096055	CM037938.1	1	100003186	C/G	C/G	R	GGAACCAGATAAGGGATTTTTTTGGGCAGACCTCT[C/G]CTGTTTGTTGTTGGGGTAGAAGAGAGCCTAGGAAG
Affx-1205096054	CM037938.1	1	100011392	C/G	G/C	R	CCAGTTTACAGCCCATCAGGCTGACAACTTCTCCT[C/G]GAAGCACAAGGAAAAACCACAAAATCCACATGCTT
Affx-87986704	CM037938.1	1	100110716	A/G	G/A	F	AGCTACAGTATCAATCATCTTTGCACTCATCGAAG[A/G]AAACGGGTATTGCTAACAGCTTGTTTCACTTGACT
Affx-98677767	CM037938.1	1	100345306	A/C	C/A	F	CATGACCCCTATCACCGTTCCCAAACCTCCACCCA[A/C]TCCCAGCGCACTTGATGTAAATCCAGTCTGGTTGT
Affx-88070437	CM037938.1	1	100508201	A/C	C/A	F	GTTCGGCTGCACATGTCACCCTCTGAAGATCCTTG[A/C]AGTCTGCGGCGGAAGACTTGCCGTACCAGGCTGTG
Affx-98680537	CM037938.1	1	100786676	A/G	C/T	R	GGGGACCTTTCGGAAGAGAGAAGTTACAACCAGTC[A/G]GAAACACGAATATGAATGGGAGGGACAATCTGACC
Affx-98988310	CM037938.1	1	100791586	T/C	T/C	F	CTGGGTCTGAGGTTTGACGTGAGCGGCTTGGAACA[C/T]CTGCAGACAGAGGGACCCTACGTCATCATCTCCAA
Affx-98992417	CM037938.1	1	100806270	T/C	T/C	F	CTCCTCATTTTCCTGTCCGAGACACCAAACTCTTC[C/T]CCTCTTCTCTCCCCTCCACATCGTCCCAGCTCCCT
Affx-99003505	CM037938.1	1	100808470	A/G	A/G	F	TCACCACAGTAACATTTATTAGCTAAGTCTTGTGC[A/G]TTCTTTGCTTGGCCAAATGTTCCTTATTGTTACAT
Affx-99004019	CM037938.1	1	100811740	A/G	A/G	F	GGTATAGGAACAGGAATACACAAAACACTGAGTAG[A/G]CCTATGTTCTACTAATATTGCTCCTCCTCCATATC
Affx-98998090	CM037938.1	1	100812044	T/G	G/T	F	TAAAATGTTTTAAACTTTGACTTTATCCACTCACA[G/T]GTTCCGAGGCGTTCCTCGAGGAAGCCGACCTGTTC
Affx-98998510	CM037938.1	1	100813501	A/C	A/C	F	CAGTAGGGTTAGTTTACAAAGATTTGGGGACAGAT[A/C]AAATCAAATTGTATGCACCGAGTACAACAGACCTT
Affx-98659745	CM037938.1	1	100814834	T/G	A/C	R	AGTATTGTCTTGGTTAATGGCCCTATTATATCAAT[G/T]AACTGTTCATATCCAGGCTGACGTATGATGTTGAT
Affx-98677101	CM037938.1	1	100816688	T/G	A/C	R	ACACAACTGTAATCAAGGTAATAGGGGTTTACACT[G/T]TCCTAGCATCCCGTATGTGTGCATGTTCATTTTTT
Affx-1205096047	CM037938.1	1	100816774	A/C	G/T	R	AGGGTGGCGTACCGTCAGGTGACCAGAGCCGTGCC[A/C]GTCTCACACTCTTACCCAGAATGCTGCCCAGGTTG
Affx-1205096046	CM037938.1	1	100822067	T/C	G/A	R	GCTATTACTGTCAATATCTCTATCGCTATCAACAT[C/T]GCTATCACTGTCCATATCGCTATCACTGTCAATAT
Affx-88036651	CM037938.1	1	100839260	A/G	G/A	F	GTTCTACTGTACAAACACTCCATCCTGCTTAAACC[A/G]CTTTGTCAATTACTTTTTAAAGCATTCTCTGCCCC
Affx-1205096042	CM037938.1	1	100840941	A/G	C/T	R	CCCAGCTCATACCTGATTACATATCATAGCCTATC[A/G]CTGTGATTCGTTATTTTTATTTAAGTCAGGTGTTA
Affx-93315466	CM037938.1	1	100904436	T/G	C/A	R	TTTGCAAATCCGATGCACAATAGTTAATATCATTT[G/T]ATTGAAATTACTATGAAACATACTTTAGGAATACG
Affx-1205096039	CM037938.1	1	100930104	T/G	C/A	R	TGCAACCTCTCAGTCTCATTTTGATTTCAGGCAGG[G/T]TGTGTGATATGATCAATATCAGCAGGGTCGCTCCC
Affx-1205096038	CM037938.1	1	100942906	A/G	C/T	R	CTCAGTCCTCTTTGTCCCGGGTGGGACATAAGGCA[A/G]CAACAATATTCTACCACTGGAGTCTGTCTTTGGCC
Affx-1205096033	CM037938.1	1	101213194	A/G	C/T	R	CCTCTGGAATCCCCTGACCTCAGGTATCAAACTCC[A/G]CCCATTCATCTGACCTCCTGTTACTCAAGACATTG
Affx-1205096032	CM037938.1	1	101227948	T/G	C/A	R	GAGGAAAACATTGTGTTTAAGGAAAAACTAAAGCT[G/T]ATTTAATTCTCTACTGTAGTACAATGTAATACAAC
Affx-1205096031	CM037938.1	1	101248222	T/C	A/G	R	AACAACAGCTCCAATAAGAACTCCCGGACTCTGTT[C/T]GCCTCTGTCAACAACCTATTTGCTCCCCTCCAGTC
Affx-1205096030	CM037938.1	1	101256519	A/G	T/C	R	TTTGTCAAGAGAGGGGGAGAGTTAAGGATGAAGAT[A/G]AGAGAAAGCGAGGGATAACTTGTCTTGGTGTTATA
Affx-1205096028	CM037938.1	1	101271646	T/C	A/G	R	GAGTGTTTATAAGGCATTCTGTGTGTTGTTGATTA[C/T]CTGAGAGCTGTTTCACTTCCTCGTATGAAATGATA
Affx-1205096027	CM037938.1	1	101291086	A/T	A/T	R	ACTTACGAAACCCAACTGTCTAGCTAACGTTATTG[A/T]TAACTAGCCCAAGATATGCCCTCTTGGGTGAACGA
Affx-1205096024	CM037938.1	1	101318393	A/G	C/T	R	TGTGCGCTCCCAGAAGCTACGGCGGATAGGAAGAG[A/G]ATATTCTGCCCGTGCTACTCTGCCCTCTTCCAAGA
Affx-1205096023	CM037938.1	1	101324763	T/C	G/A	R	ATTCTTTCCTTTGTCTAGGCGGCTAGGCCTACTGG[C/T]TGTTCATCAACCATTTGTCTTTGTAAACATATTTG
Affx-1205179489	CM037938.1	1	101507844	T/G	A/C	R	TTGGAAATTGCAGAGTAATTATAGAATAACTCAAA[G/T]GTGATGCCATTTGAACATTAACTGTGTTGGATGCC
Affx-1205096021	CM037938.1	1	101624684	T/C	A/G	R	TTAGTTCTAGAATTTTGTAAAGCCCATATACTCTT[C/T]GTTCCAGTGACATGTATGGACCCAGAACTTAATTG
Affx-1205096020	CM037938.1	1	101697184	A/G	C/T	R	AAATCGTGGCATTTAACAGTACAATTCAGCGTTCG[A/G]CTACAGACCTAGCTAAGTAGATAACTAGCTAGCTA
Affx-517057508	CM037938.1	1	101702886	T/C	C/T	F	TCAGGCGGAACTTTATGTCTGTGGCCAAGACCATC[C/T]TGAAACGCCTGTTCAGGGTCTACGCCCACATCTAC
Affx-1205096019	CM037938.1	1	101709933	C/G	G/C	R	GTGTGTATGTGGTTGGTTAGGTGGTCCAATCTGAC[C/G]ACAGGTTACGGAATGTGTTTCCAGTTCGGTCACTG
Affx-98997669	CM037938.1	1	101714492	T/C	A/G	R	AGTGAAACCAAGCTATACAAAATCATTATAGTACC[C/T]ATGCAGTACGATACATTTAAAATTCTTTAAAAATA
Affx-1205096622	CM037938.1	1	101866212	T/G	T/G	F	GAAAGTTTTTGTGTGGGTTGTATAGGTTTCTAAAC[G/T]ACATGTTCTTTCTCCTTAGATCTAAACCTCCAGAT
Affx-1205096626	CM037938.1	1	101891604	T/C	T/C	F	GACATGGGGAGACCTGATCCTACTCTAGATCAGCA[C/T]TCCTTCTCTGAGACCCTTGATACATACGGCCCCAA
Affx-1205096631	CM037938.1	1	101980989	A/C	A/C	F	GGGCGCGAACAAAGGTCCATTCCTGGAACTTCAAG[A/C]CCGGGTCATTACGTGTAGCCATACCGGGCAAGAAT
Affx-1205096632	CM037938.1	1	102019259	A/G	G/A	F	ACGTCCAACCGTAGAACACGTGTATGGCATCATGT[A/G]GGTGAGCATATTGCTGACGTTGTGAACAGAGTGCC
Affx-1205096635	CM037938.1	1	102024424	T/C	C/T	F	CAAGGCCAAATATACACTAAAGTTGCTTACCAAGC[C/T]GACATTTAATGTTCCTGAGTGGCCTAGTTACAGTT
Affx-1205096641	CM037938.1	1	102037568	T/C	C/T	F	GGTTTTATTAATCAACGGATTTGAGAGGGACACAT[C/T]AACATGTCAAGTTTAACATCAATGTAAAGCATAAG
Affx-1205096650	CM037938.1	1	102392128	A/G	A/G	F	TCTCTGGCTCGCAATCACTCACTCCCACGTCCTAC[A/G]CTCCTCAGATTAGCATGAGAGCGTTCACAGACATG
Affx-1205096651	CM037938.1	1	102399763	A/G	G/A	F	TAGTGAAATTGATTGGTGCCACAAAACACCTGCTC[A/G]CTCACATAAAATAACCAATTAGGATAAGCAATTGT
Affx-1205096653	CM037938.1	1	102409706	T/C	C/T	F	AAATAAAATGTTATGGGAAAGCCATCCATCCCTGG[C/T]ACTTTTCTCCGTGAATGTTTTAATTGTCTAATATA
Affx-1205096654	CM037938.1	1	102416051	A/T	T/A	F	ACTCAGTGCAGACTGGGGGTTCACTAAAATGTCCC[A/T]GCCCCATTCATTCGCCTCACCTGAGACAGCGAGAC
Affx-1205096655	CM037938.1	1	102424943	T/G	G/T	F	TACTTAATTTTCCCCTCCAATTTCCCCAGGCATTA[G/T]CAACTACTACAACTCAAGTTCACATGGTATAGGAA
Affx-1205096659	CM037938.1	1	102492433	C/G	G/C	F	AGACCAATTTAAGCAGAAAACTGCCTCATTATTTA[C/G]TTGGCAGACAAAGAGTCTGACAAACAAAGAGTTGC
Affx-1205094101	CM037938.1	1	102562425	T/C	T/C	F	ATTTATCCAGAGTGGATCCCTGTCATTTTCCTCTC[C/T]CCTCTCTTTACAAATCTGTGAATAGCAATATGGCG
Affx-93302144	CM037938.1	1	102612992	A/G	A/G	F	GCTAAACCATTGGGTTACAATTTTGTATTTCACTC[A/G]ATGTTTCTTGTACCTGGAGTCTTTGACTCATTGGG
Affx-1205094102	CM037938.1	1	102616369	T/C	T/C	F	CATTGTCATGTCATTCTAGATCAATAAGGAATATT[C/T]AAGTATGGCAAGTGTGTCCCTCATACTTACAAAAC
Affx-99006220	CM037938.1	1	102673421	A/C	T/G	R	CCACATATAACACAACTGGAGAGACCACTGGTCTG[A/C]CAAACAAGACTCTGCACTCTGCCGATGAAGAGAGA
Affx-1205094103	CM037938.1	1	102692316	T/C	C/T	F	CTTACCCGCCAATACCTAAATCTACCTGCATTTGG[C/T]GGGTGTTAATGTTATGCCTGGTAATGAGTGTACAT
Affx-1205094104	CM037938.1	1	102812643	A/C	A/C	F	ACACTTATGGGGGTGCTCAAACCACATTGATATTT[A/C]ATCTCCTATGTAGGCGCACTGATTTGTACTGCCCA
Affx-1205094108	CM037938.1	1	102833334	A/C	A/C	F	AAGGGTACACTACGGCTTTTTAAATGCTGAAACTA[A/C]CCTTCTCTGGGGATCGTTTCGAAGCGCCACTGAAC
Affx-98674897	CM037938.1	1	102835212	A/G	A/G	F	TGCTCAGAGAGGCTCCACACACACCTATTCGTTGC[A/G]CTCTGTTGAGTGTGTGTCCTGATCTTTGCAGGTTG
Affx-1205094110	CM037938.1	1	102849838	A/T	T/A	F	TATAGTTTACATGTCAACAACCCAGTCTGTTTAAT[A/T]AAAAAAAAAGAATATTAGGCCAACTTTATGATTAA
Affx-1205094112	CM037938.1	1	102855130	T/G	G/T	F	AGCTAAATGACTGTCTACCTCCTATCTTTTGTCTC[G/T]GAGTGTTTTGGATTGACAGTCCTTCCTCTCTAATG
[truncated: 44,756 more rows]

## Sheet: Sheet1
SNP Marker ID	CHROM	Chr .					Chr .	Count
Affx-1205092656	CM037938.1	1					1	2320
Affx-1205092661	CM037938.1	1					2	1379
Affx-1205092665	CM037938.1	1					3	1880
Affx-1205092666	CM037938.1	1					4	1821
Affx-1205092667	CM037938.1	1					5	1685
Affx-1205092668	CM037938.1	1					6	1786
Affx-1205092669	CM037938.1	1					7	1276
Affx-1205092672	CM037938.1	1					8	1358
Affx-1205092673	CM037938.1	1					9	2885
Affx-1205092674	CM037938.1	1					10	2651
Affx-1205092677	CM037938.1	1					11	1886
Affx-1205092679	CM037938.1	1					12	2155
Affx-1205092681	CM037938.1	1					13	2225
Affx-1205092682	CM037938.1	1					14	2192
Affx-1205092684	CM037938.1	1					15	2097
Affx-1205092687	CM037938.1	1					16	1682
Affx-1205092691	CM037938.1	1					17	1114
Affx-1205092692	CM037938.1	1					18	1610
Affx-1205092693	CM037938.1	1					19	1614
Affx-1205092695	CM037938.1	1					20	1808
Affx-1205092701	CM037938.1	1					21	1137
Affx-1205092702	CM037938.1	1					22	1377
Affx-1205092705	CM037938.1	1					23	1939
Affx-1205092715	CM037938.1	1					24	991
Affx-1205092717	CM037938.1	1					25	923
Affx-1205092718	CM037938.1	1					26	1856
Affx-1205095056	CM037938.1	1					27	920
Affx-1205095055	CM037938.1	1					Unplaced	188
Affx-1205095051	CM037938.1	1
Affx-1205179180	CM037938.1	1					Average	1724.7
Affx-1205095029	CM037938.1	1					Min	920
Affx-1205095027	CM037938.1	1					Max	2885
Affx-1205095025	CM037938.1	1
Affx-1205095021	CM037938.1	1
Affx-1205095020	CM037938.1	1
Affx-1205095018	CM037938.1	1
Affx-93359017	CM037938.1	1
Affx-1205095016	CM037938.1	1
Affx-1205095013	CM037938.1	1
Affx-1205095011	CM037938.1	1
Affx-1205095010	CM037938.1	1
Affx-1205095009	CM037938.1	1
Affx-1205095008	CM037938.1	1
Affx-1205095007	CM037938.1	1
Affx-1205095107	CM037938.1	1
Affx-1205095112	CM037938.1	1
Affx-1205091520	CM037938.1	1
Affx-1205091522	CM037938.1	1
Affx-1205091523	CM037938.1	1
Affx-1205091525	CM037938.1	1
Affx-1205091526	CM037938.1	1
Affx-1205091528	CM037938.1	1
Affx-1205091531	CM037938.1	1
Affx-1205091535	CM037938.1	1
Affx-1205091536	CM037938.1	1
Affx-1205091537	CM037938.1	1
Affx-1205091539	CM037938.1	1
Affx-1205091540	CM037938.1	1
Affx-517055909	CM037938.1	1
Affx-99008223	CM037938.1	1
Affx-1205091544	CM037938.1	1
Affx-1205091546	CM037938.1	1
Affx-1205091549	CM037938.1	1
Affx-1205091552	CM037938.1	1
Affx-1205091557	CM037938.1	1
Affx-1205091560	CM037938.1	1
Affx-1205091564	CM037938.1	1
Affx-1205091565	CM037938.1	1
Affx-1205091566	CM037938.1	1
Affx-1205178636	CM037938.1	1
Affx-1205091567	CM037938.1	1
Affx-1205091568	CM037938.1	1
Affx-1205091570	CM037938.1	1
Affx-1205091571	CM037938.1	1
Affx-1205091572	CM037938.1	1
Affx-1205091573	CM037938.1	1
Affx-1205091579	CM037938.1	1
Affx-1205091581	CM037938.1	1
Affx-1205091583	CM037938.1	1
Affx-1205091584	CM037938.1	1
Affx-1205091585	CM037938.1	1
Affx-1205091587	CM037938.1	1
Affx-1205091588	CM037938.1	1
Affx-1205091589	CM037938.1	1
Affx-1205091594	CM037938.1	1
Affx-1205091595	CM037938.1	1
Affx-1205091597	CM037938.1	1
Affx-1205091598	CM037938.1	1
Affx-1205091985	CM037938.1	1
Affx-1205091986	CM037938.1	1
Affx-1205091988	CM037938.1	1
Affx-87970973	CM037938.1	1
Affx-1205091996	CM037938.1	1
Affx-1205092001	CM037938.1	1
Affx-1205092006	CM037938.1	1
Affx-1205092008	CM037938.1	1
Affx-1205092011	CM037938.1	1
Affx-1205092012	CM037938.1	1
Affx-1205092013	CM037938.1	1
Affx-517055944	CM037938.1	1
Affx-1205092016	CM037938.1	1
Affx-1205092018	CM037938.1	1
Affx-1205092020	CM037938.1	1
Affx-1205092022	CM037938.1	1
Affx-1205092024	CM037938.1	1
Affx-1205092027	CM037938.1	1
Affx-1205092029	CM037938.1	1
Affx-517055950	CM037938.1	1
Affx-1205092033	CM037938.1	1
Affx-1205092035	CM037938.1	1
Affx-88038891	CM037938.1	1
Affx-1205092040	CM037938.1	1
Affx-1205092041	CM037938.1	1
Affx-517055954	CM037938.1	1
Affx-1205092043	CM037938.1	1
Affx-1205092044	CM037938.1	1
Affx-1205092046	CM037938.1	1
Affx-1205097133	CM037938.1	1
Affx-1205097131	CM037938.1	1
Affx-1205097129	CM037938.1	1
Affx-1205097128	CM037938.1	1
Affx-1205097120	CM037938.1	1
Affx-1205097115	CM037938.1	1
Affx-1205097114	CM037938.1	1
Affx-1205097113	CM037938.1	1
Affx-1205097112	CM037938.1	1
Affx-1205095142	CM037938.1	1
Affx-1205095144	CM037938.1	1
Affx-1205095146	CM037938.1	1
Affx-1205095148	CM037938.1	1
Affx-1205093714	CM037938.1	1
Affx-1205093713	CM037938.1	1
Affx-1205093712	CM037938.1	1
Affx-1205093711	CM037938.1	1
Affx-1205093709	CM037938.1	1
Affx-1205093707	CM037938.1	1
Affx-1205093705	CM037938.1	1
Affx-1205093703	CM037938.1	1
Affx-1205093702	CM037938.1	1
Affx-1205093701	CM037938.1	1
Affx-1205093700	CM037938.1	1
Affx-1205093699	CM037938.1	1
Affx-1205093696	CM037938.1	1
Affx-93323074	CM037938.1	1
Affx-87937396	CM037938.1	1
Affx-88006111	CM037938.1	1
Affx-1205093693	CM037938.1	1
Affx-1205093688	CM037938.1	1
Affx-1205093685	CM037938.1	1
Affx-1205093682	CM037938.1	1
Affx-1205093681	CM037938.1	1
Affx-1205093678	CM037938.1	1
Affx-1205093677	CM037938.1	1
Affx-517056006	CM037938.1	1
Affx-1205093676	CM037938.1	1
Affx-1205093675	CM037938.1	1
Affx-1205093673	CM037938.1	1
Affx-1205093671	CM037938.1	1
Affx-1205093670	CM037938.1	1
Affx-1205093669	CM037938.1	1
Affx-1205094454	CM037938.1	1
Affx-1205094455	CM037938.1	1
Affx-1205094456	CM037938.1	1
Affx-87874162	CM037938.1	1
Affx-1205094458	CM037938.1	1
Affx-1205094459	CM037938.1	1
Affx-1205094460	CM037938.1	1
Affx-1205094462	CM037938.1	1
Affx-1205094463	CM037938.1	1
Affx-1205094465	CM037938.1	1
Affx-1205094468	CM037938.1	1
Affx-1205094469	CM037938.1	1
Affx-1205094470	CM037938.1	1
Affx-1205094471	CM037938.1	1
Affx-1205094472	CM037938.1	1
Affx-1205094473	CM037938.1	1
Affx-1205094744	CM037938.1	1
Affx-1205179122	CM037938.1	1
Affx-1205094749	CM037938.1	1
Affx-1205094753	CM037938.1	1
Affx-1205097198	CM037938.1	1
Affx-1205097199	CM037938.1	1
Affx-1205097200	CM037938.1	1
Affx-1205097201	CM037938.1	1
Affx-1205097202	CM037938.1	1
Affx-1205097203	CM037938.1	1
Affx-1205097204	CM037938.1	1
Affx-1205097205	CM037938.1	1
Affx-1205097207	CM037938.1	1
Affx-1205097208	CM037938.1	1
Affx-98669643	CM037938.1	1
Affx-1205092808	CM037938.1	1
Affx-1205092809	CM037938.1	1
Affx-1205092810	CM037938.1	1
Affx-1205092811	CM037938.1	1
Affx-517056036	CM037938.1	1
Affx-1205092815	CM037938.1	1
Affx-1205092819	CM037938.1	1
Affx-1205092822	CM037938.1	1
Affx-1205092823	CM037938.1	1
Affx-1205092828	CM037938.1	1
Affx-1205092830	CM037938.1	1
Affx-1205092834	CM037938.1	1
Affx-1205092838	CM037938.1	1
Affx-1205092840	CM037938.1	1
Affx-1205092843	CM037938.1	1
Affx-1205092846	CM037938.1	1
Affx-1205092847	CM037938.1	1
Affx-1205092850	CM037938.1	1
Affx-1205092853	CM037938.1	1
Affx-98680432	CM037938.1	1
Affx-87958933	CM037938.1	1
Affx-1205092858	CM037938.1	1
Affx-1205092859	CM037938.1	1
Affx-1205092860	CM037938.1	1
Affx-1205092863	CM037938.1	1
Affx-1205092866	CM037938.1	1
Affx-1205178747	CM037938.1	1
Affx-93378556	CM037938.1	1
Affx-1205092870	CM037938.1	1
Affx-1205092871	CM037938.1	1
Affx-99005455	CM037938.1	1
Affx-1205092873	CM037938.1	1
Affx-1205092876	CM037938.1	1
Affx-1205092877	CM037938.1	1
Affx-1205095157	CM037938.1	1
Affx-1205095160	CM037938.1	1
Affx-1205095161	CM037938.1	1
Affx-1205095163	CM037938.1	1
Affx-1205095164	CM037938.1	1
Affx-1205095167	CM037938.1	1
Affx-1205095168	CM037938.1	1
Affx-1205095169	CM037938.1	1
Affx-1205092942	CM037938.1	1
Affx-1205092940	CM037938.1	1
Affx-1205092938	CM037938.1	1
Affx-1205092935	CM037938.1	1
Affx-1205092933	CM037938.1	1
Affx-1205092932	CM037938.1	1
Affx-1205092929	CM037938.1	1
Affx-1205092923	CM037938.1	1
Affx-1205092920	CM037938.1	1
Affx-1205092915	CM037938.1	1
Affx-1205092913	CM037938.1	1
Affx-1205092910	CM037938.1	1
Affx-1205092906	CM037938.1	1
Affx-1205092904	CM037938.1	1
Affx-1205092902	CM037938.1	1
Affx-1205092897	CM037938.1	1
Affx-1205092896	CM037938.1	1
Affx-1205092895	CM037938.1	1
Affx-1205092894	CM037938.1	1
Affx-1205092891	CM037938.1	1
Affx-87989497	CM037938.1	1
Affx-1205092888	CM037938.1	1
Affx-1205092883	CM037938.1	1
Affx-1205092882	CM037938.1	1
Affx-1205092879	CM037938.1	1
Affx-1205095920	CM037938.1	1
Affx-1205095918	CM037938.1	1
Affx-1205095916	CM037938.1	1
Affx-1205095915	CM037938.1	1
Affx-1205095913	CM037938.1	1
Affx-1205095910	CM037938.1	1
Affx-1205095909	CM037938.1	1
Affx-1205095907	CM037938.1	1
Affx-1205095903	CM037938.1	1
Affx-1205095900	CM037938.1	1
Affx-1205095898	CM037938.1	1
Affx-1205092447	CM037938.1	1
Affx-1205092453	CM037938.1	1
Affx-87892094	CM037938.1	1
Affx-1205092455	CM037938.1	1
Affx-1205092458	CM037938.1	1
Affx-1205092462	CM037938.1	1
Affx-1205092464	CM037938.1	1
Affx-1205092469	CM037938.1	1
Affx-1205092472	CM037938.1	1
Affx-1205092474	CM037938.1	1
Affx-517056162	CM037938.1	1
Affx-1205092476	CM037938.1	1
Affx-1205092477	CM037938.1	1
Affx-1205092479	CM037938.1	1
Affx-1205092481	CM037938.1	1
Affx-1205092482	CM037938.1	1
Affx-1205092484	CM037938.1	1
Affx-1205092485	CM037938.1	1
Affx-1205092486	CM037938.1	1
Affx-1205092487	CM037938.1	1
Affx-1205092492	CM037938.1	1
Affx-1205092494	CM037938.1	1
Affx-1205092496	CM037938.1	1
Affx-1205092498	CM037938.1	1
Affx-1205092500	CM037938.1	1
Affx-1205095739	CM037938.1	1
Affx-1205095737	CM037938.1	1
Affx-1205095736	CM037938.1	1
Affx-1205095735	CM037938.1	1
Affx-1205095733	CM037938.1	1
Affx-1205095731	CM037938.1	1
Affx-1205095727	CM037938.1	1
Affx-1205095726	CM037938.1	1
Affx-1205095714	CM037938.1	1
Affx-87917870	CM037938.1	1
Affx-1205095709	CM037938.1	1
Affx-1205095707	CM037938.1	1
Affx-88004554	CM037938.1	1
Affx-1205095705	CM037938.1	1
Affx-1205095700	CM037938.1	1
Affx-517056191	CM037938.1	1
Affx-1205095699	CM037938.1	1
Affx-517056194	CM037938.1	1
Affx-1205095697	CM037938.1	1
Affx-1205095696	CM037938.1	1
Affx-1205095695	CM037938.1	1
Affx-1205095691	CM037938.1	1
Affx-1205095690	CM037938.1	1
Affx-1205095689	CM037938.1	1
Affx-1205095686	CM037938.1	1
Affx-1205095684	CM037938.1	1
Affx-1205095680	CM037938.1	1
Affx-98674987	CM037938.1	1
Affx-93291683	CM037938.1	1
Affx-93395573	CM037938.1	1
Affx-1205095677	CM037938.1	1
Affx-1205095676	CM037938.1	1
Affx-87926872	CM037938.1	1
Affx-1205095674	CM037938.1	1
Affx-1205095671	CM037938.1	1
Affx-1205095669	CM037938.1	1
Affx-1205095666	CM037938.1	1
Affx-1205095662	CM037938.1	1
Affx-93406096	CM037938.1	1
Affx-1205095657	CM037938.1	1
Affx-1205095654	CM037938.1	1
Affx-1205095652	CM037938.1	1
Affx-1205095651	CM037938.1	1
Affx-99004850	CM037938.1	1
Affx-1205095650	CM037938.1	1
Affx-1205095645	CM037938.1	1
Affx-1205095642	CM037938.1	1
Affx-1205095639	CM037938.1	1
Affx-1205095635	CM037938.1	1
Affx-1205095631	CM037938.1	1
Affx-1205095628	CM037938.1	1
Affx-1205095624	CM037938.1	1
Affx-1205095622	CM037938.1	1
Affx-1205095619	CM037938.1	1
Affx-1205095611	CM037938.1	1
Affx-1205095610	CM037938.1	1
Affx-1205095605	CM037938.1	1
Affx-1205095601	CM037938.1	1
Affx-1205179393	CM037938.1	1
Affx-1205095600	CM037938.1	1
Affx-1205095598	CM037938.1	1
Affx-1205095596	CM037938.1	1
Affx-1205095594	CM037938.1	1
Affx-1205095592	CM037938.1	1
Affx-88095683	CM037938.1	1
Affx-1205095591	CM037938.1	1
Affx-1205095589	CM037938.1	1
Affx-1205095588	CM037938.1	1
Affx-1205095584	CM037938.1	1
Affx-1205095581	CM037938.1	1
Affx-1205095580	CM037938.1	1
Affx-1205179392	CM037938.1	1
Affx-1205095578	CM037938.1	1
Affx-1205095576	CM037938.1	1
Affx-1205095575	CM037938.1	1
Affx-1205095572	CM037938.1	1
Affx-1205095566	CM037938.1	1
Affx-1205095564	CM037938.1	1
Affx-1205095561	CM037938.1	1
Affx-1205095559	CM037938.1	1
Affx-1205095558	CM037938.1	1
Affx-1205095557	CM037938.1	1
Affx-99010106	CM037938.1	1
Affx-98685772	CM037938.1	1
Affx-93324942	CM037938.1	1
Affx-1205095554	CM037938.1	1
Affx-1205095552	CM037938.1	1
Affx-1205095551	CM037938.1	1
Affx-1205095549	CM037938.1	1
Affx-1205095547	CM037938.1	1
Affx-1205095546	CM037938.1	1
Affx-1205095545	CM037938.1	1
Affx-1205095542	CM037938.1	1
Affx-1205095540	CM037938.1	1
Affx-1205095537	CM037938.1	1
Affx-1205095536	CM037938.1	1
Affx-1205095535	CM037938.1	1
Affx-98664351	CM037938.1	1
Affx-1205095532	CM037938.1	1
Affx-1205095531	CM037938.1	1
Affx-517056249	CM037938.1	1
Affx-1205095529	CM037938.1	1
Affx-1205095528	CM037938.1	1
Affx-1205095526	CM037938.1	1
Affx-1205095090	CM037938.1	1
Affx-1205095088	CM037938.1	1
Affx-1205095087	CM037938.1	1
Affx-1205095084	CM037938.1	1
Affx-1205095082	CM037938.1	1
Affx-1205095075	CM037938.1	1
Affx-1205095074	CM037938.1	1
Affx-1205095072	CM037938.1	1
Affx-1205095069	CM037938.1	1
Affx-517056283	CM037938.1	1
Affx-1205095067	CM037938.1	1
Affx-1205095063	CM037938.1	1
Affx-1205095060	CM037938.1	1
Affx-1205095058	CM037938.1	1
Affx-1205094258	CM037938.1	1
Affx-1205094261	CM037938.1	1
Affx-1205094262	CM037938.1	1
Affx-1205094264	CM037938.1	1
Affx-1205094265	CM037938.1	1
Affx-1205094266	CM037938.1	1
Affx-1205094041	CM037938.1	1
Affx-1205094042	CM037938.1	1
Affx-1205094043	CM037938.1	1
Affx-1205094044	CM037938.1	1
Affx-1205094046	CM037938.1	1
Affx-1205094047	CM037938.1	1
Affx-1205094049	CM037938.1	1
Affx-1205094051	CM037938.1	1
Affx-1205094052	CM037938.1	1
Affx-1205094054	CM037938.1	1
Affx-1205094055	CM037938.1	1
Affx-1205094058	CM037938.1	1
Affx-87977127	CM037938.1	1
Affx-1205094059	CM037938.1	1
Affx-517056309	CM037938.1	1
Affx-1205094063	CM037938.1	1
Affx-1205094064	CM037938.1	1
Affx-1205094065	CM037938.1	1
Affx-1205094067	CM037938.1	1
Affx-1205094071	CM037938.1	1
Affx-1205094076	CM037938.1	1
Affx-88124140	CM037938.1	1
Affx-1205094078	CM037938.1	1
Affx-1205094085	CM037938.1	1
Affx-1205094087	CM037938.1	1
Affx-1205094088	CM037938.1	1
Affx-1205094090	CM037938.1	1
Affx-1205094093	CM037938.1	1
Affx-1205094095	CM037938.1	1
Affx-98989663	CM037938.1	1
Affx-1205092167	CM037938.1	1
Affx-1205092169	CM037938.1	1
Affx-1205092170	CM037938.1	1
Affx-87952929	CM037938.1	1
Affx-1205092176	CM037938.1	1
Affx-93453268	CM037938.1	1
Affx-98660569	CM037938.1	1
Affx-1205092181	CM037938.1	1
Affx-1205092182	CM037938.1	1
Affx-1205092185	CM037938.1	1
Affx-87918466	CM037938.1	1
Affx-1205092189	CM037938.1	1
Affx-1205092190	CM037938.1	1
Affx-1205092192	CM037938.1	1
Affx-1205092193	CM037938.1	1
Affx-1205092198	CM037938.1	1
Affx-1205092199	CM037938.1	1
Affx-1205092203	CM037938.1	1
Affx-1205092205	CM037938.1	1
Affx-1205178656	CM037938.1	1
Affx-1205092206	CM037938.1	1
Affx-1205092208	CM037938.1	1
Affx-1205092209	CM037938.1	1
Affx-87907521	CM037938.1	1
Affx-1205092210	CM037938.1	1
Affx-99004131	CM037938.1	1
Affx-1205092211	CM037938.1	1
Affx-98995921	CM037938.1	1
Affx-1205092213	CM037938.1	1
Affx-1205092214	CM037938.1	1
Affx-1205092217	CM037938.1	1
Affx-1205092221	CM037938.1	1
Affx-1205092223	CM037938.1	1
Affx-1205092224	CM037938.1	1
Affx-1205092226	CM037938.1	1
Affx-1205092228	CM037938.1	1
Affx-1205092230	CM037938.1	1
Affx-1205092232	CM037938.1	1
Affx-1205092234	CM037938.1	1
Affx-1205092236	CM037938.1	1
Affx-1205092237	CM037938.1	1
Affx-1205092239	CM037938.1	1
Affx-1205092242	CM037938.1	1
Affx-1205092243	CM037938.1	1
Affx-1205092244	CM037938.1	1
Affx-1205092245	CM037938.1	1
Affx-1205092252	CM037938.1	1
Affx-1205092253	CM037938.1	1
Affx-1205092255	CM037938.1	1
Affx-1205096016	CM037938.1	1
Affx-1205096013	CM037938.1	1
Affx-1205096011	CM037938.1	1
Affx-1205096010	CM037938.1	1
Affx-1205096008	CM037938.1	1
Affx-1205096005	CM037938.1	1
Affx-1205096004	CM037938.1	1
Affx-1205096003	CM037938.1	1
Affx-1205095998	CM037938.1	1
Affx-1205095997	CM037938.1	1
Affx-1205095995	CM037938.1	1
Affx-1205095992	CM037938.1	1
Affx-1205095989	CM037938.1	1
Affx-1205095985	CM037938.1	1
Affx-1205095980	CM037938.1	1
Affx-1205095978	CM037938.1	1
Affx-1205095977	CM037938.1	1
Affx-1205095975	CM037938.1	1
Affx-1205095974	CM037938.1	1
Affx-1205095973	CM037938.1	1
Affx-517056722	CM037938.1	1
Affx-1205095972	CM037938.1	1
Affx-1205095970	CM037938.1	1
Affx-1205095964	CM037938.1	1
Affx-98680155	CM037938.1	1
Affx-99000341	CM037938.1	1
Affx-1205095957	CM037938.1	1
Affx-1205095955	CM037938.1	1
Affx-1205095954	CM037938.1	1
Affx-1205095949	CM037938.1	1
Affx-1205095948	CM037938.1	1
Affx-93368826	CM037938.1	1
Affx-98987224	CM037938.1	1
Affx-1205095947	CM037938.1	1
Affx-1205095946	CM037938.1	1
Affx-1205095941	CM037938.1	1
Affx-1205095939	CM037938.1	1
Affx-1205095936	CM037938.1	1
Affx-1205095935	CM037938.1	1
Affx-1205095934	CM037938.1	1
Affx-98998123	CM037938.1	1
Affx-1205179454	CM037938.1	1
Affx-1205095933	CM037938.1	1
Affx-1205095932	CM037938.1	1
Affx-1205095930	CM037938.1	1
Affx-1205095929	CM037938.1	1
Affx-1205095927	CM037938.1	1
Affx-88008699	CM037938.1	1
Affx-87962836	CM037938.1	1
Affx-87909937	CM037938.1	1
Affx-1205095926	CM037938.1	1
Affx-1205095924	CM037938.1	1
Affx-1205095923	CM037938.1	1
Affx-93293061	CM037938.1	1
Affx-1205091173	CM037938.1	1
Affx-1205091174	CM037938.1	1
Affx-88045094	CM037938.1	1
Affx-1205091178	CM037938.1	1
Affx-1205091180	CM037938.1	1
Affx-1205091182	CM037938.1	1
Affx-1205091184	CM037938.1	1
Affx-1205178590	CM037938.1	1
Affx-1205091185	CM037938.1	1
Affx-98661748	CM037938.1	1
Affx-1205091186	CM037938.1	1
Affx-1205091187	CM037938.1	1
Affx-1205178591	CM037938.1	1
Affx-1205091190	CM037938.1	1
Affx-98671611	CM037938.1	1
Affx-1205091191	CM037938.1	1
Affx-1205091194	CM037938.1	1
Affx-1205091195	CM037938.1	1
Affx-93297001	CM037938.1	1
Affx-98661194	CM037938.1	1
Affx-87933867	CM037938.1	1
Affx-1205178592	CM037938.1	1
Affx-87987756	CM037938.1	1
Affx-1205091197	CM037938.1	1
Affx-1205091198	CM037938.1	1
Affx-1205091199	CM037938.1	1
Affx-1205091201	CM037938.1	1
Affx-99009868	CM037938.1	1
Affx-1205091203	CM037938.1	1
Affx-1205091204	CM037938.1	1
Affx-1205178593	CM037938.1	1
Affx-1205091209	CM037938.1	1
Affx-1205091210	CM037938.1	1
Affx-98678306	CM037938.1	1
Affx-88121782	CM037938.1	1
Affx-87903823	CM037938.1	1
Affx-87902950	CM037938.1	1
Affx-1205091217	CM037938.1	1
Affx-1205091218	CM037938.1	1
Affx-1205091223	CM037938.1	1
Affx-1205091226	CM037938.1	1
Affx-1205091228	CM037938.1	1
Affx-1205091232	CM037938.1	1
Affx-1205091235	CM037938.1	1
Affx-87954262	CM037938.1	1
Affx-1205091238	CM037938.1	1
Affx-1205091239	CM037938.1	1
Affx-1205091241	CM037938.1	1
Affx-87886676	CM037938.1	1
Affx-87886681	CM037938.1	1
Affx-1205091243	CM037938.1	1
Affx-93376887	CM037938.1	1
Affx-87962566	CM037938.1	1
Affx-87962569	CM037938.1	1
Affx-1205091248	CM037938.1	1
Affx-1205091249	CM037938.1	1
Affx-88121768	CM037938.1	1
Affx-98677194	CM037938.1	1
Affx-1205091252	CM037938.1	1
Affx-98666900	CM037938.1	1
Affx-93444869	CM037938.1	1
Affx-93333361	CM037938.1	1
Affx-1205091253	CM037938.1	1
Affx-88049160	CM037938.1	1
Affx-98683187	CM037938.1	1
Affx-1205091254	CM037938.1	1
Affx-1205091256	CM037938.1	1
Affx-1205091257	CM037938.1	1
Affx-1205091259	CM037938.1	1
Affx-87880092	CM037938.1	1
Affx-87923913	CM037938.1	1
Affx-98681048	CM037938.1	1
Affx-1205091260	CM037938.1	1
Affx-1205091261	CM037938.1	1
Affx-1205091262	CM037938.1	1
Affx-98680772	CM037938.1	1
Affx-1205091263	CM037938.1	1
Affx-87954232	CM037938.1	1
Affx-1205091264	CM037938.1	1
Affx-517056780	CM037938.1	1
Affx-88002239	CM037938.1	1
Affx-1205091265	CM037938.1	1
Affx-1205091268	CM037938.1	1
Affx-1205091273	CM037938.1	1
Affx-1205091278	CM037938.1	1
Affx-98681294	CM037938.1	1
Affx-98680720	CM037938.1	1
Affx-1205091279	CM037938.1	1
Affx-98667970	CM037938.1	1
Affx-98662703	CM037938.1	1
Affx-1205091281	CM037938.1	1
Affx-1205091282	CM037938.1	1
Affx-93415280	CM037938.1	1
Affx-1205091284	CM037938.1	1
Affx-93420711	CM037938.1	1
Affx-98998836	CM037938.1	1
Affx-1205091288	CM037938.1	1
Affx-1205091289	CM037938.1	1
Affx-1205091292	CM037938.1	1
Affx-1205091294	CM037938.1	1
Affx-1205091298	CM037938.1	1
Affx-1205091300	CM037938.1	1
Affx-1205093622	CM037938.1	1
Affx-87930757	CM037938.1	1
Affx-1205093620	CM037938.1	1
Affx-1205093619	CM037938.1	1
Affx-1205093617	CM037938.1	1
Affx-1205093615	CM037938.1	1
Affx-1205093614	CM037938.1	1
Affx-1205093612	CM037938.1	1
Affx-1205093610	CM037938.1	1
Affx-1205093608	CM037938.1	1
Affx-1205093605	CM037938.1	1
Affx-1205093602	CM037938.1	1
Affx-1205093601	CM037938.1	1
Affx-93300531	CM037938.1	1
Affx-1205093600	CM037938.1	1
Affx-93335579	CM037938.1	1
Affx-87982405	CM037938.1	1
Affx-1205093593	CM037938.1	1
Affx-1205093590	CM037938.1	1
Affx-1205093586	CM037938.1	1
Affx-1205093583	CM037938.1	1
Affx-87975747	CM037938.1	1
Affx-1205093581	CM037938.1	1
Affx-1205093579	CM037938.1	1
Affx-1205093870	CM037938.1	1
Affx-1205093872	CM037938.1	1
Affx-1205093874	CM037938.1	1
Affx-1205093875	CM037938.1	1
Affx-1205093878	CM037938.1	1
Affx-1205093879	CM037938.1	1
Affx-1205093882	CM037938.1	1
Affx-1205093884	CM037938.1	1
Affx-1205096938	CM037938.1	1
Affx-1205096933	CM037938.1	1
Affx-1205096931	CM037938.1	1
Affx-1205096929	CM037938.1	1
Affx-1205096927	CM037938.1	1
Affx-1205096926	CM037938.1	1
Affx-1205096925	CM037938.1	1
Affx-1205096922	CM037938.1	1
Affx-1205096920	CM037938.1	1
Affx-1205096916	CM037938.1	1
Affx-1205096914	CM037938.1	1
Affx-1205096912	CM037938.1	1
Affx-1205096911	CM037938.1	1
Affx-88047031	CM037938.1	1
Affx-1205096910	CM037938.1	1
Affx-1205096909	CM037938.1	1
Affx-1205096905	CM037938.1	1
Affx-1205096902	CM037938.1	1
Affx-1205096899	CM037938.1	1
Affx-1205096897	CM037938.1	1
Affx-1205096894	CM037938.1	1
Affx-1205096892	CM037938.1	1
Affx-1205096889	CM037938.1	1
Affx-1205096887	CM037938.1	1
Affx-517056846	CM037938.1	1
Affx-1205096883	CM037938.1	1
Affx-1205096881	CM037938.1	1
Affx-1205096873	CM037938.1	1
Affx-1205096871	CM037938.1	1
Affx-1205096870	CM037938.1	1
Affx-1205096869	CM037938.1	1
Affx-517056852	CM037938.1	1
Affx-1205096868	CM037938.1	1
Affx-1205096866	CM037938.1	1
Affx-1205096862	CM037938.1	1
Affx-517056364	CM037938.1	1
Affx-1205096857	CM037938.1	1
Affx-1205096854	CM037938.1	1
Affx-88121966	CM037938.1	1
Affx-1205096853	CM037938.1	1
Affx-1205096852	CM037938.1	1
Affx-88123072	CM037938.1	1
Affx-1205096851	CM037938.1	1
Affx-88122466	CM037938.1	1
Affx-1205096850	CM037938.1	1
Affx-1205096849	CM037938.1	1
Affx-1205096848	CM037938.1	1
Affx-1205096845	CM037938.1	1
Affx-1205096844	CM037938.1	1
Affx-88080834	CM037938.1	1
Affx-88050472	CM037938.1	1
Affx-1205096842	CM037938.1	1
Affx-1205096840	CM037938.1	1
Affx-87998423	CM037938.1	1
Affx-1205096839	CM037938.1	1
Affx-1205178538	CM037938.1	1
Affx-1205096838	CM037938.1	1
Affx-1205096836	CM037938.1	1
Affx-87882113	CM037938.1	1
Affx-1205096832	CM037938.1	1
Affx-1205096829	CM037938.1	1
Affx-1205096828	CM037938.1	1
Affx-88061985	CM037938.1	1
Affx-1205096827	CM037938.1	1
Affx-87851515	CM037938.1	1
Affx-87851513	CM037938.1	1
Affx-517021348	CM037938.1	1
Affx-1205096824	CM037938.1	1
Affx-93284050	CM037938.1	1
Affx-1205179646	CM037938.1	1
Affx-1205179645	CM037938.1	1
Affx-1205096818	CM037938.1	1
Affx-93327372	CM037938.1	1
Affx-1205096815	CM037938.1	1
Affx-1205096814	CM037938.1	1
Affx-1205179644	CM037938.1	1
Affx-1205096813	CM037938.1	1
Affx-88122834	CM037938.1	1
Affx-99006977	CM037938.1	1
Affx-1205096810	CM037938.1	1
Affx-1205096811	CM037938.1	1
Affx-1205096809	CM037938.1	1
Affx-1205096807	CM037938.1	1
Affx-1205096806	CM037938.1	1
Affx-1205096804	CM037938.1	1
Affx-1205096801	CM037938.1	1
Affx-88059199	CM037938.1	1
Affx-1205096798	CM037938.1	1
Affx-98987358	CM037938.1	1
Affx-1205096795	CM037938.1	1
Affx-1205096794	CM037938.1	1
Affx-1205096793	CM037938.1	1
Affx-1205096792	CM037938.1	1
Affx-1205096790	CM037938.1	1
Affx-1205096789	CM037938.1	1
Affx-87988935	CM037938.1	1
Affx-1205096787	CM037938.1	1
Affx-1205096784	CM037938.1	1
Affx-98669296	CM037938.1	1
Affx-1205096783	CM037938.1	1
Affx-1205096782	CM037938.1	1
Affx-517056404	CM037938.1	1
Affx-1205096780	CM037938.1	1
Affx-1205096775	CM037938.1	1
Affx-1205096774	CM037938.1	1
Affx-1205096773	CM037938.1	1
Affx-1205096772	CM037938.1	1
Affx-1205096770	CM037938.1	1
Affx-1205096765	CM037938.1	1
Affx-1205096763	CM037938.1	1
Affx-1205096761	CM037938.1	1
Affx-1205096759	CM037938.1	1
Affx-1205096758	CM037938.1	1
Affx-1205096757	CM037938.1	1
Affx-1205096756	CM037938.1	1
Affx-1205096754	CM037938.1	1
Affx-1205096753	CM037938.1	1
Affx-87974716	CM037938.1	1
Affx-1205096748	CM037938.1	1
Affx-88124081	CM037938.1	1
Affx-1205096743	CM037938.1	1
Affx-1205096742	CM037938.1	1
Affx-1205096741	CM037938.1	1
Affx-1205096739	CM037938.1	1
Affx-1205096737	CM037938.1	1
Affx-1205096736	CM037938.1	1
Affx-1205096734	CM037938.1	1
Affx-1205096733	CM037938.1	1
Affx-1205096732	CM037938.1	1
Affx-1205096731	CM037938.1	1
Affx-1205096730	CM037938.1	1
Affx-1205096729	CM037938.1	1
Affx-98987626	CM037938.1	1
Affx-98994951	CM037938.1	1
Affx-1205096727	CM037938.1	1
Affx-1205096722	CM037938.1	1
Affx-87924218	CM037938.1	1
Affx-1205096718	CM037938.1	1
Affx-1205096717	CM037938.1	1
Affx-1205096714	CM037938.1	1
Affx-1205096712	CM037938.1	1
Affx-98671851	CM037938.1	1
Affx-87953276	CM037938.1	1
Affx-1205096706	CM037938.1	1
Affx-1205096705	CM037938.1	1
Affx-98994193	CM037938.1	1
Affx-1205095204	CM037938.1	1
Affx-1205095206	CM037938.1	1
Affx-87951229	CM037938.1	1
Affx-1205095208	CM037938.1	1
Affx-93441224	CM037938.1	1
Affx-1205095210	CM037938.1	1
Affx-1205095212	CM037938.1	1
Affx-1205095213	CM037938.1	1
Affx-1205095215	CM037938.1	1
Affx-88108593	CM037938.1	1
Affx-88018820	CM037938.1	1
Affx-1205095218	CM037938.1	1
Affx-93415705	CM037938.1	1
Affx-1205095224	CM037938.1	1
Affx-1205095226	CM037938.1	1
Affx-1205095227	CM037938.1	1
Affx-1205095228	CM037938.1	1
Affx-1205179336	CM037938.1	1
Affx-1205179337	CM037938.1	1
Affx-1205095230	CM037938.1	1
Affx-93392243	CM037938.1	1
Affx-1205095232	CM037938.1	1
Affx-1205095234	CM037938.1	1
Affx-1205095236	CM037938.1	1
Affx-1205179338	CM037938.1	1
Affx-1205095238	CM037938.1	1
Affx-1205095241	CM037938.1	1
Affx-1205095245	CM037938.1	1
Affx-1205095247	CM037938.1	1
Affx-87929675	CM037938.1	1
Affx-93278220	CM037938.1	1
Affx-1205179339	CM037938.1	1
Affx-93362068	CM037938.1	1
Affx-1205095253	CM037938.1	1
Affx-1205179340	CM037938.1	1
Affx-1205095258	CM037938.1	1
Affx-1205095259	CM037938.1	1
Affx-1205095261	CM037938.1	1
Affx-1205095266	CM037938.1	1
Affx-1205095267	CM037938.1	1
Affx-1205095270	CM037938.1	1
Affx-1205095271	CM037938.1	1
Affx-1205095273	CM037938.1	1
Affx-1205095275	CM037938.1	1
Affx-517056483	CM037938.1	1
Affx-1205095279	CM037938.1	1
Affx-1205095280	CM037938.1	1
Affx-1205095281	CM037938.1	1
Affx-1205095284	CM037938.1	1
Affx-1205095285	CM037938.1	1
Affx-1205095286	CM037938.1	1
Affx-1205095288	CM037938.1	1
Affx-1205095292	CM037938.1	1
Affx-1205095294	CM037938.1	1
Affx-1205095295	CM037938.1	1
Affx-1205095298	CM037938.1	1
Affx-1205095300	CM037938.1	1
Affx-1205095305	CM037938.1	1
Affx-1205095310	CM037938.1	1
Affx-1205095313	CM037938.1	1
Affx-1205095314	CM037938.1	1
Affx-98661074	CM037938.1	1
Affx-1205095315	CM037938.1	1
Affx-1205095318	CM037938.1	1
Affx-1205095320	CM037938.1	1
Affx-1205095325	CM037938.1	1
Affx-517056503	CM037938.1	1
Affx-1205179341	CM037938.1	1
Affx-88031197	CM037938.1	1
Affx-1205095326	CM037938.1	1
Affx-93389303	CM037938.1	1
Affx-517056512	CM037938.1	1
Affx-1205095330	CM037938.1	1
Affx-1205095331	CM037938.1	1
Affx-1205095333	CM037938.1	1
Affx-1205095334	CM037938.1	1
Affx-1205095335	CM037938.1	1
Affx-1205095336	CM037938.1	1
Affx-1205095338	CM037938.1	1
Affx-87932730	CM037938.1	1
Affx-1205095339	CM037938.1	1
Affx-88097701	CM037938.1	1
Affx-1205095340	CM037938.1	1
Affx-1205095342	CM037938.1	1
Affx-1205095343	CM037938.1	1
Affx-1205095345	CM037938.1	1
Affx-1205095346	CM037938.1	1
Affx-1205095347	CM037938.1	1
Affx-1205095348	CM037938.1	1
Affx-98671519	CM037938.1	1
Affx-88058812	CM037938.1	1
Affx-1205095349	CM037938.1	1
Affx-87982905	CM037938.1	1
Affx-1205095357	CM037938.1	1
Affx-87963376	CM037938.1	1
Affx-1205095361	CM037938.1	1
Affx-1205095363	CM037938.1	1
Affx-517056529	CM037938.1	1
Affx-1205095365	CM037938.1	1
Affx-1205095366	CM037938.1	1
Affx-93451059	CM037938.1	1
Affx-88122449	CM037938.1	1
Affx-88123321	CM037938.1	1
Affx-93417899	CM037938.1	1
Affx-88122469	CM037938.1	1
Affx-1205095373	CM037938.1	1
Affx-1205095375	CM037938.1	1
Affx-88042244	CM037938.1	1
Affx-1205095382	CM037938.1	1
Affx-1205095384	CM037938.1	1
Affx-99009541	CM037938.1	1
Affx-1205095385	CM037938.1	1
Affx-1205095386	CM037938.1	1
Affx-1205095387	CM037938.1	1
Affx-99005162	CM037938.1	1
Affx-87880568	CM037938.1	1
Affx-1205095389	CM037938.1	1
Affx-1205095391	CM037938.1	1
Affx-1205095393	CM037938.1	1
Affx-1205095398	CM037938.1	1
Affx-1205095400	CM037938.1	1
Affx-1205095408	CM037938.1	1
Affx-1205095411	CM037938.1	1
Affx-1205095412	CM037938.1	1
Affx-1205095416	CM037938.1	1
Affx-87987746	CM037938.1	1
Affx-1205095418	CM037938.1	1
Affx-1205095419	CM037938.1	1
Affx-1205095422	CM037938.1	1
Affx-1205095424	CM037938.1	1
Affx-1205095426	CM037938.1	1
Affx-1205095428	CM037938.1	1
Affx-1205095430	CM037938.1	1
Affx-1205095433	CM037938.1	1
Affx-1205095436	CM037938.1	1
Affx-1205095439	CM037938.1	1
Affx-1205095442	CM037938.1	1
Affx-98991985	CM037938.1	1
Affx-1205095446	CM037938.1	1
Affx-1205095447	CM037938.1	1
Affx-1205095449	CM037938.1	1
Affx-1205095452	CM037938.1	1
Affx-87981098	CM037938.1	1
Affx-1205095454	CM037938.1	1
Affx-1205095458	CM037938.1	1
Affx-1205095467	CM037938.1	1
Affx-1205095469	CM037938.1	1
Affx-1205095470	CM037938.1	1
Affx-517056570	CM037938.1	1
Affx-1205095471	CM037938.1	1
Affx-1205095472	CM037938.1	1
Affx-1205091805	CM037938.1	1
Affx-1205091806	CM037938.1	1
Affx-1205091807	CM037938.1	1
Affx-1205091809	CM037938.1	1
Affx-1205091810	CM037938.1	1
Affx-1205091812	CM037938.1	1
Affx-1205091813	CM037938.1	1
Affx-1205091814	CM037938.1	1
Affx-1205091816	CM037938.1	1
Affx-1205091817	CM037938.1	1
Affx-1205091818	CM037938.1	1
Affx-1205091820	CM037938.1	1
Affx-1205091822	CM037938.1	1
Affx-1205091824	CM037938.1	1
Affx-1205091826	CM037938.1	1
Affx-1205091827	CM037938.1	1
Affx-1205091829	CM037938.1	1
Affx-1205091830	CM037938.1	1
Affx-1205091834	CM037938.1	1
Affx-88008463	CM037938.1	1
Affx-1205091836	CM037938.1	1
Affx-1205091838	CM037938.1	1
Affx-1205091839	CM037938.1	1
Affx-1205091840	CM037938.1	1
Affx-1205091841	CM037938.1	1
Affx-1205091843	CM037938.1	1
Affx-1205091846	CM037938.1	1
Affx-98661922	CM037938.1	1
Affx-1205091850	CM037938.1	1
Affx-1205091853	CM037938.1	1
Affx-1205091854	CM037938.1	1
Affx-1205091861	CM037938.1	1
Affx-1205091863	CM037938.1	1
Affx-1205091865	CM037938.1	1
Affx-98991105	CM037938.1	1
Affx-1205091868	CM037938.1	1
Affx-1205091874	CM037938.1	1
Affx-1205155774	CM037938.1	1
Affx-1205155775	CM037938.1	1
Affx-1205155776	CM037938.1	1
Affx-1205155778	CM037938.1	1
Affx-1205155779	CM037938.1	1
Affx-1205155780	CM037938.1	1
Affx-1205155783	CM037938.1	1
Affx-1205155784	CM037938.1	1
Affx-1205155788	CM037938.1	1
Affx-1205155790	CM037938.1	1
Affx-1205155793	CM037938.1	1
Affx-1205155795	CM037938.1	1
Affx-1205155798	CM037938.1	1
Affx-1205155800	CM037938.1	1
Affx-517056641	CM037938.1	1
Affx-1205155804	CM037938.1	1
Affx-1205097259	CM037938.1	1
Affx-1205097257	CM037938.1	1
Affx-517027595	CM037938.1	1
Affx-1205097253	CM037938.1	1
Affx-1205097251	CM037938.1	1
Affx-1205097248	CM037938.1	1
Affx-1205097244	CM037938.1	1
Affx-1205097240	CM037938.1	1
Affx-1205097238	CM037938.1	1
Affx-1205097232	CM037938.1	1
Affx-1205097231	CM037938.1	1
Affx-88103719	CM037938.1	1
Affx-1205093075	CM037938.1	1
Affx-1205093072	CM037938.1	1
Affx-87932231	CM037938.1	1
Affx-1205093069	CM037938.1	1
Affx-1205093065	CM037938.1	1
Affx-1205093063	CM037938.1	1
Affx-1205093061	CM037938.1	1
Affx-1205093060	CM037938.1	1
Affx-93386094	CM037938.1	1
Affx-1205093057	CM037938.1	1
Affx-1205093053	CM037938.1	1
Affx-87968019	CM037938.1	1
Affx-1205096286	CM037938.1	1
Affx-1205179542	CM037938.1	1
Affx-1205096290	CM037938.1	1
Affx-1205096293	CM037938.1	1
Affx-1205096296	CM037938.1	1
Affx-1205096297	CM037938.1	1
Affx-1205096301	CM037938.1	1
Affx-1205096304	CM037938.1	1
Affx-1205096162	CM037938.1	1
Affx-1205096305	CM037938.1	1
Affx-1205096308	CM037938.1	1
Affx-1205096312	CM037938.1	1
Affx-1205096314	CM037938.1	1
Affx-1205096317	CM037938.1	1
Affx-1205096320	CM037938.1	1
Affx-1205096322	CM037938.1	1
Affx-1205096327	CM037938.1	1
Affx-1205096330	CM037938.1	1
Affx-1205096331	CM037938.1	1
Affx-1205152922	CM037938.1	1
Affx-1205152920	CM037938.1	1
Affx-1205152916	CM037938.1	1
Affx-1205152913	CM037938.1	1
Affx-1205152907	CM037938.1	1
Affx-1205152900	CM037938.1	1
Affx-1205152898	CM037938.1	1
Affx-1205093820	CM037938.1	1
Affx-1205093809	CM037938.1	1
Affx-1205093806	CM037938.1	1
Affx-1205093804	CM037938.1	1
Affx-1205093800	CM037938.1	1
Affx-1205093796	CM037938.1	1
Affx-1205093795	CM037938.1	1
Affx-1205093792	CM037938.1	1
Affx-1205093791	CM037938.1	1
Affx-1205093790	CM037938.1	1
Affx-1205096567	CM037938.1	1
Affx-1205096564	CM037938.1	1
Affx-1205096561	CM037938.1	1
Affx-1205096558	CM037938.1	1
Affx-1205096556	CM037938.1	1
Affx-1205096554	CM037938.1	1
Affx-1205096551	CM037938.1	1
Affx-1205096548	CM037938.1	1
Affx-1205096545	CM037938.1	1
Affx-1205096544	CM037938.1	1
Affx-1205096543	CM037938.1	1
Affx-1205096541	CM037938.1	1
Affx-1205096540	CM037938.1	1
Affx-1205094257	CM037938.1	1
Affx-1205094256	CM037938.1	1
Affx-1205094253	CM037938.1	1
Affx-1205094250	CM037938.1	1
Affx-1205094249	CM037938.1	1
Affx-93383327	CM037938.1	1
Affx-1205094248	CM037938.1	1
Affx-517057038	CM037938.1	1
Affx-1205094245	CM037938.1	1
Affx-1205094243	CM037938.1	1
Affx-1205094242	CM037938.1	1
Affx-1205094239	CM037938.1	1
Affx-1205094238	CM037938.1	1
Affx-1205094237	CM037938.1	1
Affx-1205094236	CM037938.1	1
Affx-1205094233	CM037938.1	1
Affx-1205152811	CM037938.1	1
Affx-1205152810	CM037938.1	1
Affx-1205152809	CM037938.1	1
Affx-1205152559	CM037938.1	1
Affx-1205152556	CM037938.1	1
Affx-1205152554	CM037938.1	1
Affx-1205152552	CM037938.1	1
Affx-1205152551	CM037938.1	1
Affx-1205152549	CM037938.1	1
Affx-1205152547	CM037938.1	1
Affx-1205152546	CM037938.1	1
Affx-1205152544	CM037938.1	1
Affx-1205152541	CM037938.1	1
Affx-1205152540	CM037938.1	1
Affx-1205152536	CM037938.1	1
Affx-1205097264	CM037938.1	1
Affx-1205097265	CM037938.1	1
Affx-1205097266	CM037938.1	1
Affx-1205097270	CM037938.1	1
Affx-1205097273	CM037938.1	1
Affx-1205097277	CM037938.1	1
Affx-1205097281	CM037938.1	1
Affx-1205097283	CM037938.1	1
Affx-1205097288	CM037938.1	1
Affx-1205097291	CM037938.1	1
Affx-93280445	CM037938.1	1
Affx-1205097297	CM037938.1	1
Affx-1205097299	CM037938.1	1
Affx-1205097302	CM037938.1	1
Affx-1205097305	CM037938.1	1
Affx-1205154825	CM037938.1	1
Affx-1205154823	CM037938.1	1
Affx-1205154822	CM037938.1	1
Affx-1205154819	CM037938.1	1
Affx-1205159786	CM037938.1	1
Affx-1205159785	CM037938.1	1
Affx-1205094992	CM037938.1	1
Affx-1205095005	CM037938.1	1
Affx-93302615	CM037938.1	1
Affx-1205154548	CM037938.1	1
Affx-1205095000	CM037938.1	1
Affx-1205155007	CM037938.1	1
Affx-1205155005	CM037938.1	1
Affx-99000406	CM037938.1	1
Affx-1205155002	CM037938.1	1
Affx-1205155000	CM037938.1	1
Affx-1205154997	CM037938.1	1
Affx-1205154995	CM037938.1	1
Affx-1205154993	CM037938.1	1
Affx-1205093866	CM037938.1	1
Affx-1205093865	CM037938.1	1
Affx-1205091134	CM037938.1	1
Affx-98663660	CM037938.1	1
Affx-1205091135	CM037938.1	1
Affx-1205091136	CM037938.1	1
Affx-1205091138	CM037938.1	1
Affx-87879789	CM037938.1	1
Affx-1205091141	CM037938.1	1
Affx-93425908	CM037938.1	1
Affx-93366367	CM037938.1	1
Affx-87898789	CM037938.1	1
Affx-1205091145	CM037938.1	1
Affx-517056980	CM037938.1	1
Affx-1205178589	CM037938.1	1
Affx-88025453	CM037938.1	1
Affx-1205091151	CM037938.1	1
Affx-1205091153	CM037938.1	1
Affx-88006419	CM037938.1	1
Affx-1205091155	CM037938.1	1
Affx-1205091156	CM037938.1	1
Affx-1205091159	CM037938.1	1
Affx-1205091161	CM037938.1	1
Affx-1205091162	CM037938.1	1
Affx-1205091167	CM037938.1	1
Affx-1205091377	CM037938.1	1
Affx-1205091375	CM037938.1	1
Affx-1205091372	CM037938.1	1
Affx-1205091363	CM037938.1	1
Affx-1205091360	CM037938.1	1
Affx-1205091358	CM037938.1	1
Affx-1205091357	CM037938.1	1
Affx-1205091356	CM037938.1	1
Affx-517057057	CM037938.1	1
Affx-1205091352	CM037938.1	1
Affx-1205091351	CM037938.1	1
Affx-1205091349	CM037938.1	1
Affx-1205091347	CM037938.1	1
Affx-1205091344	CM037938.1	1
Affx-1205091343	CM037938.1	1
Affx-1205091337	CM037938.1	1
Affx-1205091336	CM037938.1	1
Affx-1205091335	CM037938.1	1
Affx-1205091333	CM037938.1	1
Affx-1205091332	CM037938.1	1
Affx-1205091330	CM037938.1	1
Affx-1205091327	CM037938.1	1
Affx-1205091325	CM037938.1	1
Affx-1205091322	CM037938.1	1
Affx-1205091320	CM037938.1	1
Affx-517057065	CM037938.1	1
Affx-1205091317	CM037938.1	1
Affx-1205091315	CM037938.1	1
Affx-517057069	CM037938.1	1
Affx-1205091314	CM037938.1	1
Affx-1205091313	CM037938.1	1
Affx-1205091312	CM037938.1	1
Affx-1205093307	CM037938.1	1
Affx-1205093308	CM037938.1	1
Affx-1205093309	CM037938.1	1
Affx-1205093311	CM037938.1	1
Affx-1205093312	CM037938.1	1
Affx-1205178858	CM037938.1	1
Affx-1205093316	CM037938.1	1
Affx-1205093317	CM037938.1	1
Affx-1205093318	CM037938.1	1
Affx-1205093320	CM037938.1	1
Affx-1205093325	CM037938.1	1
Affx-99000369	CM037938.1	1
Affx-1205093327	CM037938.1	1
Affx-1205093328	CM037938.1	1
Affx-1205093329	CM037938.1	1
Affx-99008600	CM037938.1	1
Affx-1205096245	CM037938.1	1
Affx-1205096240	CM037938.1	1
Affx-1205096238	CM037938.1	1
Affx-1205096237	CM037938.1	1
Affx-1205096235	CM037938.1	1
Affx-1205096231	CM037938.1	1
Affx-1205096228	CM037938.1	1
Affx-1205096227	CM037938.1	1
Affx-1205096224	CM037938.1	1
Affx-1205096221	CM037938.1	1
Affx-1205096219	CM037938.1	1
Affx-98683427	CM037938.1	1
Affx-93343475	CM037938.1	1
Affx-1205095894	CM037938.1	1
Affx-1205095156	CM037938.1	1
Affx-1205095155	CM037938.1	1
Affx-1205094904	CM037938.1	1
Affx-1205094902	CM037938.1	1
Affx-1205094898	CM037938.1	1
Affx-1205094893	CM037938.1	1
Affx-93309180	CM037938.1	1
Affx-1205094890	CM037938.1	1
Affx-1205094889	CM037938.1	1
Affx-1205094887	CM037938.1	1
Affx-87970784	CM037938.1	1
Affx-1205094885	CM037938.1	1
Affx-1205094884	CM037938.1	1
Affx-1205094882	CM037938.1	1
Affx-1205094877	CM037938.1	1
Affx-1205092805	CM037938.1	1
Affx-1205092802	CM037938.1	1
Affx-1205092798	CM037938.1	1
Affx-1205092796	CM037938.1	1
Affx-1205092793	CM037938.1	1
Affx-1205092791	CM037938.1	1
Affx-1205092790	CM037938.1	1
Affx-1205092788	CM037938.1	1
Affx-1205092785	CM037938.1	1
Affx-1205092783	CM037938.1	1
Affx-1205092781	CM037938.1	1
Affx-1205092778	CM037938.1	1
Affx-1205092777	CM037938.1	1
Affx-1205092775	CM037938.1	1
Affx-1205092772	CM037938.1	1
Affx-1205092770	CM037938.1	1
Affx-1205092769	CM037938.1	1
Affx-1205092768	CM037938.1	1
Affx-1205092767	CM037938.1	1
Affx-1205092764	CM037938.1	1
Affx-1205092762	CM037938.1	1
Affx-1205092760	CM037938.1	1
Affx-1205092755	CM037938.1	1
Affx-1205092751	CM037938.1	1
Affx-1205092748	CM037938.1	1
Affx-1205092744	CM037938.1	1
Affx-1205092743	CM037938.1	1
Affx-1205092742	CM037938.1	1
Affx-1205092741	CM037938.1	1
Affx-93280740	CM037938.1	1
Affx-1205092740	CM037938.1	1
Affx-1205092739	CM037938.1	1
Affx-1205092738	CM037938.1	1
Affx-1205092735	CM037938.1	1
Affx-1205092733	CM037938.1	1
Affx-1205092730	CM037938.1	1
Affx-1205092727	CM037938.1	1
Affx-1205092726	CM037938.1	1
Affx-1205092723	CM037938.1	1
Affx-99003584	CM037938.1	1
Affx-93350163	CM037938.1	1
Affx-1205094036	CM037938.1	1
Affx-93454615	CM037938.1	1
Affx-1205094034	CM037938.1	1
Affx-1205094032	CM037938.1	1
Affx-1205094029	CM037938.1	1
Affx-1205179000	CM037938.1	1
Affx-1205178999	CM037938.1	1
Affx-1205094026	CM037938.1	1
Affx-1205094025	CM037938.1	1
Affx-1205094022	CM037938.1	1
Affx-99001006	CM037938.1	1
Affx-1205094205	CM037938.1	1
Affx-1205094204	CM037938.1	1
Affx-1205094203	CM037938.1	1
Affx-88085666	CM037938.1	1
Affx-1205094202	CM037938.1	1
Affx-1205094201	CM037938.1	1
Affx-1205094197	CM037938.1	1
Affx-1205094195	CM037938.1	1
Affx-1205094194	CM037938.1	1
Affx-1205094193	CM037938.1	1
Affx-1205094190	CM037938.1	1
Affx-1205094189	CM037938.1	1
Affx-1205094188	CM037938.1	1
Affx-1205094187	CM037938.1	1
Affx-1205094184	CM037938.1	1
Affx-1205094181	CM037938.1	1
Affx-1205094179	CM037938.1	1
Affx-1205097191	CM037938.1	1
Affx-1205097195	CM037938.1	1
Affx-1205097197	CM037938.1	1
Affx-1205179702	CM037938.1	1
Affx-93316772	CM037938.1	1
Affx-99006083	CM037938.1	1
Affx-88079577	CM037938.1	1
Affx-1205092442	CM037938.1	1
Affx-98657848	CM037938.1	1
Affx-98686042	CM037938.1	1
Affx-1205092440	CM037938.1	1
Affx-1205092439	CM037938.1	1
Affx-1205092438	CM037938.1	1
Affx-1205092435	CM037938.1	1
Affx-1205092433	CM037938.1	1
Affx-1205092432	CM037938.1	1
Affx-1205092431	CM037938.1	1
Affx-1205092430	CM037938.1	1
Affx-1205092428	CM037938.1	1
Affx-1205092427	CM037938.1	1
Affx-1205092422	CM037938.1	1
Affx-1205092416	CM037938.1	1
Affx-1205092415	CM037938.1	1
Affx-1205092413	CM037938.1	1
Affx-1205092412	CM037938.1	1
Affx-87901182	CM037938.1	1
Affx-1205092411	CM037938.1	1
Affx-1205092410	CM037938.1	1
Affx-1205092409	CM037938.1	1
Affx-1205092408	CM037938.1	1
Affx-1205092407	CM037938.1	1
Affx-88124110	CM037938.1	1
Affx-1205092405	CM037938.1	1
Affx-1205092403	CM037938.1	1
Affx-1205178694	CM037938.1	1
Affx-1205178693	CM037938.1	1
Affx-1205178692	CM037938.1	1
Affx-1205092402	CM037938.1	1
Affx-98988767	CM037938.1	1
Affx-1205092401	CM037938.1	1
Affx-88066611	CM037938.1	1
Affx-1205092400	CM037938.1	1
Affx-93289773	CM037938.1	1
Affx-88032003	CM037938.1	1
Affx-98668166	CM037938.1	1
Affx-1205092395	CM037938.1	1
Affx-1205092394	CM037938.1	1
Affx-1205092393	CM037938.1	1
Affx-87855318	CM037938.1	1
Affx-1205092390	CM037938.1	1
Affx-1205092388	CM037938.1	1
Affx-1205092385	CM037938.1	1
Affx-1205092384	CM037938.1	1
Affx-1205092383	CM037938.1	1
Affx-1205092382	CM037938.1	1
Affx-1205092380	CM037938.1	1
Affx-98664373	CM037938.1	1
Affx-93419582	CM037938.1	1
Affx-98675981	CM037938.1	1
Affx-1205178691	CM037938.1	1
Affx-1205092376	CM037938.1	1
Affx-1205092375	CM037938.1	1
Affx-1205092371	CM037938.1	1
Affx-98681725	CM037938.1	1
Affx-1205092369	CM037938.1	1
Affx-1205092368	CM037938.1	1
Affx-1205092367	CM037938.1	1
Affx-87935545	CM037938.1	1
Affx-93377254	CM037938.1	1
Affx-1205092365	CM037938.1	1
Affx-1205092364	CM037938.1	1
Affx-1205092362	CM037938.1	1
Affx-1205092361	CM037938.1	1
Affx-1205092359	CM037938.1	1
Affx-1205092356	CM037938.1	1
Affx-1205092355	CM037938.1	1
Affx-1205092354	CM037938.1	1
Affx-1205092353	CM037938.1	1
Affx-1205092352	CM037938.1	1
Affx-1205092351	CM037938.1	1
Affx-1205092348	CM037938.1	1
Affx-1205092347	CM037938.1	1
Affx-88034381	CM037938.1	1
Affx-1205092346	CM037938.1	1
Affx-1205178690	CM037938.1	1
Affx-1205092345	CM037938.1	1
Affx-1205092344	CM037938.1	1
Affx-1205092343	CM037938.1	1
Affx-1205092342	CM037938.1	1
Affx-1205092340	CM037938.1	1
Affx-1205178689	CM037938.1	1
Affx-1205092339	CM037938.1	1
Affx-1205092338	CM037938.1	1
Affx-87861658	CM037938.1	1
Affx-1205092335	CM037938.1	1
Affx-1205178688	CM037938.1	1
Affx-1205092333	CM037938.1	1
Affx-1205092329	CM037938.1	1
Affx-1205093489	CM037938.1	1
Affx-1205093493	CM037938.1	1
Affx-1205093500	CM037938.1	1
Affx-1205093502	CM037938.1	1
Affx-1205093507	CM037938.1	1
Affx-1205093509	CM037938.1	1
Affx-1205093513	CM037938.1	1
Affx-1205093516	CM037938.1	1
Affx-1205093517	CM037938.1	1
Affx-1205093519	CM037938.1	1
Affx-1205093522	CM037938.1	1
Affx-87931176	CM037938.1	1
Affx-1205093525	CM037938.1	1
Affx-1205093528	CM037938.1	1
Affx-1205093530	CM037938.1	1
Affx-1205093531	CM037938.1	1
Affx-1205093534	CM037938.1	1
Affx-1205093536	CM037938.1	1
Affx-1205093539	CM037938.1	1
Affx-87915134	CM037938.1	1
Affx-1205093540	CM037938.1	1
Affx-1205093541	CM037938.1	1
Affx-1205093547	CM037938.1	1
Affx-93373503	CM037938.1	1
Affx-1205093550	CM037938.1	1
Affx-87918131	CM037938.1	1
Affx-93415328	CM037938.1	1
Affx-1205093554	CM037938.1	1
Affx-87862585	CM037938.1	1
Affx-1205093557	CM037938.1	1
Affx-1205093560	CM037938.1	1
Affx-98673638	CM037938.1	1
Affx-1205093562	CM037938.1	1
Affx-1205093563	CM037938.1	1
Affx-1205093564	CM037938.1	1
Affx-88083951	CM037938.1	1
Affx-1205093565	CM037938.1	1
Affx-93323912	CM037938.1	1
Affx-1205093571	CM037938.1	1
Affx-1205093572	CM037938.1	1
Affx-1205093573	CM037938.1	1
Affx-99005962	CM037938.1	1
Affx-1205093575	CM037938.1	1
Affx-93272580	CM037938.1	1
Affx-1205093577	CM037938.1	1
Affx-98666801	CM037938.1	1
Affx-1205097155	CM037938.1	1
Affx-1205097157	CM037938.1	1
Affx-98989637	CM037938.1	1
Affx-98670216	CM037938.1	1
Affx-1205097162	CM037938.1	1
Affx-1205097163	CM037938.1	1
Affx-93363081	CM037938.1	1
Affx-98997964	CM037938.1	1
Affx-99000078	CM037938.1	1
Affx-93440072	CM037938.1	1
Affx-87916793	CM037938.1	1
Affx-1205097169	CM037938.1	1
Affx-93357279	CM037938.1	1
Affx-93269440	CM037938.1	1
Affx-87993602	CM037938.1	1
Affx-93385050	CM037938.1	1
Affx-1205097170	CM037938.1	1
Affx-1205097173	CM037938.1	1
Affx-93323153	CM037938.1	1
Affx-98998805	CM037938.1	1
Affx-1205097223	CM037938.1	1
Affx-1205097220	CM037938.1	1
Affx-88012134	CM037938.1	1
Affx-1205097219	CM037938.1	1
Affx-88123992	CM037938.1	1
Affx-1205097218	CM037938.1	1
Affx-1205097216	CM037938.1	1
Affx-93441990	CM037938.1	1
Affx-99006357	CM037938.1	1
Affx-98999518	CM037938.1	1
Affx-1205097214	CM037938.1	1
Affx-93427290	CM037938.1	1
Affx-1205097213	CM037938.1	1
Affx-1205097211	CM037938.1	1
Affx-87932658	CM037938.1	1
Affx-87988570	CM037938.1	1
Affx-1205097209	CM037938.1	1
Affx-98666665	CM037938.1	1
Affx-1205092645	CM037938.1	1
Affx-1205092643	CM037938.1	1
Affx-1205092641	CM037938.1	1
Affx-98669575	CM037938.1	1
Affx-1205092639	CM037938.1	1
Affx-93444488	CM037938.1	1
Affx-1205092636	CM037938.1	1
Affx-1205092633	CM037938.1	1
Affx-1205092632	CM037938.1	1
Affx-1205092628	CM037938.1	1
Affx-99009263	CM037938.1	1
Affx-98684197	CM037938.1	1
Affx-1205092627	CM037938.1	1
Affx-1205092626	CM037938.1	1
Affx-1205092624	CM037938.1	1
Affx-1205092623	CM037938.1	1
Affx-1205092622	CM037938.1	1
Affx-1205092619	CM037938.1	1
Affx-1205092616	CM037938.1	1
Affx-1205092613	CM037938.1	1
Affx-1205092611	CM037938.1	1
Affx-1205092609	CM037938.1	1
Affx-1205092607	CM037938.1	1
Affx-1205092604	CM037938.1	1
Affx-1205092596	CM037938.1	1
Affx-1205092594	CM037938.1	1
Affx-1205092590	CM037938.1	1
Affx-1205092589	CM037938.1	1
Affx-1205092586	CM037938.1	1
Affx-1205092582	CM037938.1	1
Affx-1205092580	CM037938.1	1
Affx-1205092578	CM037938.1	1
Affx-98682851	CM037938.1	1
Affx-1205092575	CM037938.1	1
Affx-1205092571	CM037938.1	1
Affx-1205092568	CM037938.1	1
Affx-1205092566	CM037938.1	1
Affx-517057294	CM037938.1	1
Affx-1205092559	CM037938.1	1
Affx-1205092558	CM037938.1	1
Affx-1205092555	CM037938.1	1
Affx-1205092554	CM037938.1	1
Affx-87973071	CM037938.1	1
Affx-87959550	CM037938.1	1
Affx-1205092552	CM037938.1	1
Affx-1205092551	CM037938.1	1
Affx-1205092549	CM037938.1	1
Affx-88077917	CM037938.1	1
Affx-1205092328	CM037938.1	1
Affx-1205092325	CM037938.1	1
Affx-517057309	CM037938.1	1
Affx-517057311	CM037938.1	1
Affx-1205092319	CM037938.1	1
Affx-1205092317	CM037938.1	1
Affx-1205092309	CM037938.1	1
Affx-1205092308	CM037938.1	1
Affx-1205092307	CM037938.1	1
Affx-87909814	CM037938.1	1
Affx-1205092305	CM037938.1	1
Affx-1205092303	CM037938.1	1
Affx-1205092302	CM037938.1	1
Affx-1205092301	CM037938.1	1
Affx-1205092299	CM037938.1	1
Affx-88008723	CM037938.1	1
Affx-1205092298	CM037938.1	1
Affx-1205092296	CM037938.1	1
Affx-1205178668	CM037938.1	1
Affx-1205092294	CM037938.1	1
Affx-1205092293	CM037938.1	1
Affx-1205092292	CM037938.1	1
Affx-1205092291	CM037938.1	1
Affx-1205092289	CM037938.1	1
Affx-1205092287	CM037938.1	1
Affx-1205092285	CM037938.1	1
Affx-1205092284	CM037938.1	1
Affx-1205092279	CM037938.1	1
Affx-1205092278	CM037938.1	1
Affx-87933680	CM037938.1	1
Affx-1205092277	CM037938.1	1
Affx-1205092274	CM037938.1	1
Affx-1205092272	CM037938.1	1
Affx-1205178667	CM037938.1	1
Affx-1205092271	CM037938.1	1
Affx-1205092270	CM037938.1	1
Affx-1205092268	CM037938.1	1
Affx-1205092266	CM037938.1	1
Affx-1205092262	CM037938.1	1
Affx-1205092261	CM037938.1	1
Affx-1205092258	CM037938.1	1
Affx-87874648	CM037938.1	1
Affx-1205093863	CM037938.1	1
Affx-1205093862	CM037938.1	1
Affx-1205093861	CM037938.1	1
Affx-1205093860	CM037938.1	1
Affx-1205093859	CM037938.1	1
Affx-1205093855	CM037938.1	1
Affx-1205093853	CM037938.1	1
Affx-1205093851	CM037938.1	1
Affx-87976945	CM037938.1	1
Affx-1205093849	CM037938.1	1
Affx-1205093846	CM037938.1	1
Affx-1205093841	CM037938.1	1
Affx-87936865	CM037938.1	1
Affx-1205093840	CM037938.1	1
Affx-1205093838	CM037938.1	1
Affx-1205093836	CM037938.1	1
Affx-93445837	CM037938.1	1
Affx-1205093834	CM037938.1	1
Affx-1205093829	CM037938.1	1
Affx-1205093827	CM037938.1	1
Affx-1205093823	CM037938.1	1
Affx-88110501	CM037938.1	1
Affx-98999530	CM037938.1	1
Affx-1205093821	CM037938.1	1
Affx-1205095049	CM037938.1	1
Affx-1205095048	CM037938.1	1
Affx-1205095047	CM037938.1	1
Affx-1205095046	CM037938.1	1
Affx-1205095044	CM037938.1	1
Affx-93352646	CM037938.1	1
Affx-87927228	CM037938.1	1
Affx-1205095043	CM037938.1	1
Affx-1205095042	CM037938.1	1
Affx-1205095040	CM037938.1	1
Affx-1205095037	CM037938.1	1
Affx-1205095036	CM037938.1	1
Affx-1205095032	CM037938.1	1
Affx-87959977	CM037938.1	1
Affx-1205092951	CM037938.1	1
Affx-1205092954	CM037938.1	1
Affx-1205092956	CM037938.1	1
Affx-88023332	CM037938.1	1
Affx-87993609	CM037938.1	1
Affx-88003654	CM037938.1	1
Affx-87863255	CM037938.1	1
Affx-98993273	CM037938.1	1
Affx-1205092960	CM037938.1	1
Affx-1205092961	CM037938.1	1
Affx-1205092962	CM037938.1	1
Affx-98987379	CM037938.1	1
Affx-1205092965	CM037938.1	1
Affx-1205092968	CM037938.1	1
Affx-1205092972	CM037938.1	1
Affx-1205092973	CM037938.1	1
Affx-93352132	CM037938.1	1
Affx-1205092976	CM037938.1	1
Affx-1205092977	CM037938.1	1
Affx-1205092979	CM037938.1	1
Affx-93298509	CM037938.1	1
Affx-1205092988	CM037938.1	1
Affx-1205092993	CM037938.1	1
Affx-1205092995	CM037938.1	1
Affx-1205092999	CM037938.1	1
Affx-1205093000	CM037938.1	1
Affx-93397987	CM037938.1	1
Affx-1205093001	CM037938.1	1
Affx-1205093002	CM037938.1	1
Affx-1205093005	CM037938.1	1
Affx-1205093006	CM037938.1	1
Affx-1205178785	CM037938.1	1
Affx-1205093008	CM037938.1	1
Affx-1205093009	CM037938.1	1
Affx-1205093010	CM037938.1	1
Affx-1205093012	CM037938.1	1
Affx-1205093018	CM037938.1	1
Affx-87886549	CM037938.1	1
Affx-1205093022	CM037938.1	1
Affx-1205093024	CM037938.1	1
Affx-1205093027	CM037938.1	1
Affx-1205093028	CM037938.1	1
Affx-1205093029	CM037938.1	1
Affx-98676639	CM037938.1	1
Affx-1205093031	CM037938.1	1
Affx-1205093032	CM037938.1	1
Affx-1205093033	CM037938.1	1
Affx-1205093035	CM037938.1	1
Affx-1205093036	CM037938.1	1
Affx-1205093037	CM037938.1	1
Affx-1205093039	CM037938.1	1
Affx-1205093043	CM037938.1	1
Affx-1205093045	CM037938.1	1
Affx-1205093046	CM037938.1	1
Affx-1205093047	CM037938.1	1
Affx-1205093048	CM037938.1	1
Affx-1205093049	CM037938.1	1
Affx-1205093050	CM037938.1	1
Affx-1205093051	CM037938.1	1
Affx-98682119	CM037938.1	1
Affx-87899425	CM037938.1	1
Affx-1205095171	CM037938.1	1
Affx-1205094316	CM037938.1	1
Affx-88002022	CM037938.1	1
Affx-1205179061	CM037938.1	1
Affx-88006808	CM037938.1	1
Affx-87930392	CM037938.1	1
Affx-1205094319	CM037938.1	1
Affx-1205094322	CM037938.1	1
Affx-1205094325	CM037938.1	1
Affx-1205094326	CM037938.1	1
Affx-1205094327	CM037938.1	1
Affx-1205094329	CM037938.1	1
Affx-1205094331	CM037938.1	1
Affx-1205094336	CM037938.1	1
Affx-93278060	CM037938.1	1
Affx-88101696	CM037938.1	1
Affx-1205094342	CM037938.1	1
Affx-1205094345	CM037938.1	1
Affx-87935502	CM037938.1	1
Affx-98663175	CM037938.1	1
Affx-99009684	CM037938.1	1
Affx-1205094664	CM037938.1	1
Affx-1205094661	CM037938.1	1
Affx-87872369	CM037938.1	1
Affx-1205094660	CM037938.1	1
Affx-1205094658	CM037938.1	1
Affx-1205091110	CM037938.1	1
Affx-1205091111	CM037938.1	1
Affx-1205091112	CM037938.1	1
Affx-1205091113	CM037938.1	1
Affx-1205091114	CM037938.1	1
Affx-1205091119	CM037938.1	1
Affx-1205091120	CM037938.1	1
Affx-1205091122	CM037938.1	1
Affx-87962946	CM037938.1	1
Affx-1205091126	CM037938.1	1
Affx-88048068	CM037938.1	1
Affx-87999826	CM037938.1	1
Affx-1205094232	CM037938.1	1
Affx-1205094231	CM037938.1	1
Affx-1205094228	CM037938.1	1
Affx-1205094227	CM037938.1	1
Affx-1205094226	CM037938.1	1
Affx-1205094221	CM037938.1	1
Affx-1205094220	CM037938.1	1
Affx-99004981	CM037938.1	1
Affx-93370395	CM037938.1	1
Affx-88101656	CM037938.1	1
Affx-1205094214	CM037938.1	1
Affx-87858059	CM037938.1	1
Affx-1205094213	CM037938.1	1
Affx-88123193	CM037938.1	1
Affx-1205094211	CM037938.1	1
Affx-87948101	CM037938.1	1
Affx-1205093153	CM037938.1	1
Affx-87991138	CM037938.1	1
Affx-1205093150	CM037938.1	1
Affx-1205093148	CM037938.1	1
Affx-1205093146	CM037938.1	1
Affx-87975419	CM037938.1	1
Affx-88122534	CM037938.1	1
Affx-1205093142	CM037938.1	1
Affx-87863236	CM037938.1	1
Affx-1205093139	CM037938.1	1
Affx-99001199	CM037938.1	1
Affx-87880002	CM037938.1	1
Affx-88011024	CM037938.1	1
Affx-1205093138	CM037938.1	1
Affx-1205093137	CM037938.1	1
Affx-87938754	CM037938.1	1
Affx-1205093133	CM037938.1	1
Affx-517037074	CM037938.1	1
Affx-1205093132	CM037938.1	1
Affx-1205093131	CM037938.1	1
Affx-1205093128	CM037938.1	1
Affx-1205178804	CM037938.1	1
Affx-88009173	CM037938.1	1
Affx-1205093126	CM037938.1	1
Affx-1205093125	CM037938.1	1
Affx-1205093124	CM037938.1	1
Affx-1205093123	CM037938.1	1
Affx-93449051	CM037938.1	1
Affx-1205093122	CM037938.1	1
Affx-87935276	CM037938.1	1
Affx-1205093121	CM037938.1	1
Affx-1205093120	CM037938.1	1
Affx-1205093119	CM037938.1	1
Affx-1205093118	CM037938.1	1
Affx-1205093117	CM037938.1	1
Affx-1205093116	CM037938.1	1
Affx-87857807	CM037938.1	1
Affx-1205093113	CM037938.1	1
Affx-87866134	CM037938.1	1
Affx-1205093111	CM037938.1	1
Affx-1205093110	CM037938.1	1
Affx-1205093107	CM037938.1	1
Affx-1205093106	CM037938.1	1
Affx-1205093105	CM037938.1	1
Affx-1205093104	CM037938.1	1
Affx-1205093103	CM037938.1	1
Affx-93369076	CM037938.1	1
Affx-1205093097	CM037938.1	1
Affx-1205093096	CM037938.1	1
Affx-1205093093	CM037938.1	1
Affx-1205093090	CM037938.1	1
Affx-1205093087	CM037938.1	1
Affx-1205093084	CM037938.1	1
Affx-1205093080	CM037938.1	1
Affx-1205093077	CM037938.1	1
Affx-87957709	CM037938.1	1
Affx-88014189	CM037938.1	1
Affx-1205095123	CM037938.1	1
Affx-1205095125	CM037938.1	1
Affx-1205095126	CM037938.1	1
Affx-1205095128	CM037938.1	1
Affx-1205095129	CM037938.1	1
Affx-1205095130	CM037938.1	1
Affx-1205095132	CM037938.1	1
Affx-1205093666	CM037938.1	1
Affx-1205093665	CM037938.1	1
Affx-93383072	CM037938.1	1
Affx-87872272	CM037938.1	1
Affx-98680551	CM037938.1	1
Affx-1205093660	CM037938.1	1
Affx-87890003	CM037938.1	1
Affx-1205093659	CM037938.1	1
Affx-1205093656	CM037938.1	1
Affx-1205093655	CM037938.1	1
Affx-1205093653	CM037938.1	1
Affx-88117248	CM037938.1	1
Affx-1205178915	CM037938.1	1
Affx-1205093652	CM037938.1	1
Affx-1205093651	CM037938.1	1
Affx-1205093648	CM037938.1	1
Affx-98999744	CM037938.1	1
Affx-1205093645	CM037938.1	1
Affx-1205093644	CM037938.1	1
Affx-87934485	CM037938.1	1
Affx-88062595	CM037938.1	1
Affx-98679971	CM037938.1	1
Affx-1205093641	CM037938.1	1
Affx-1205093639	CM037938.1	1
Affx-1205093637	CM037938.1	1
Affx-98680626	CM037938.1	1
Affx-1205093636	CM037938.1	1
Affx-1205093634	CM037938.1	1
Affx-93290122	CM037938.1	1
Affx-1205093629	CM037938.1	1
Affx-1205093628	CM037938.1	1
Affx-1205093627	CM037938.1	1
Affx-1205093626	CM037938.1	1
Affx-1205093624	CM037938.1	1
Affx-1205093718	CM037938.1	1
Affx-1205093719	CM037938.1	1
Affx-1205093720	CM037938.1	1
Affx-517057438	CM037938.1	1
Affx-1205093723	CM037938.1	1
Affx-1205093725	CM037938.1	1
Affx-1205093727	CM037938.1	1
Affx-1205093728	CM037938.1	1
Affx-87902395	CM037938.1	1
Affx-1205093729	CM037938.1	1
Affx-1205093730	CM037938.1	1
Affx-1205093731	CM037938.1	1
Affx-1205093732	CM037938.1	1
Affx-93358129	CM037938.1	1
Affx-1205093733	CM037938.1	1
Affx-1205093748	CM037938.1	1
Affx-1205093746	CM037938.1	1
Affx-98990101	CM037938.1	1
Affx-1205093745	CM037938.1	1
Affx-1205093744	CM037938.1	1
Affx-1205093740	CM037938.1	1
Affx-1205093738	CM037938.1	1
Affx-93434028	CM037938.1	1
Affx-93451720	CM037938.1	1
Affx-98677673	CM037938.1	1
Affx-1205093205	CM037938.1	1
Affx-93319600	CM037938.1	1
Affx-1205178816	CM037938.1	1
Affx-1205093202	CM037938.1	1
Affx-1205093200	CM037938.1	1
Affx-1205178815	CM037938.1	1
Affx-87927934	CM037938.1	1
Affx-1205093751	CM037938.1	1
Affx-93332703	CM037938.1	1
Affx-93453169	CM037938.1	1
Affx-1205093191	CM037938.1	1
Affx-88092268	CM037938.1	1
Affx-98996987	CM037938.1	1
Affx-1205093188	CM037938.1	1
Affx-1205093185	CM037938.1	1
Affx-98661298	CM037938.1	1
Affx-1205093182	CM037938.1	1
Affx-1205093179	CM037938.1	1
Affx-1205093173	CM037938.1	1
Affx-93393784	CM037938.1	1
Affx-93457505	CM037938.1	1
Affx-1205093168	CM037938.1	1
Affx-1205093166	CM037938.1	1
Affx-98677884	CM037938.1	1
Affx-1205093161	CM037938.1	1
Affx-1205093158	CM037938.1	1
Affx-88085239	CM037938.1	1
Affx-1205096121	CM037938.1	1
Affx-1205096120	CM037938.1	1
Affx-1205096118	CM037938.1	1
Affx-1205096114	CM037938.1	1
Affx-87962028	CM037938.1	1
Affx-1205096111	CM037938.1	1
Affx-93325114	CM037938.1	1
Affx-1205096107	CM037938.1	1
Affx-1205096100	CM037938.1	1
Affx-1205096098	CM037938.1	1
Affx-1205096096	CM037938.1	1
Affx-1205096090	CM037938.1	1
Affx-1205096084	CM037938.1	1
Affx-1205096081	CM037938.1	1
Affx-1205096074	CM037938.1	1
Affx-1205096070	CM037938.1	1
Affx-1205096068	CM037938.1	1
Affx-1205096065	CM037938.1	1
Affx-1205096063	CM037938.1	1
Affx-93276348	CM037938.1	1
Affx-1205096058	CM037938.1	1
Affx-1205096057	CM037938.1	1
Affx-93406450	CM037938.1	1
Affx-1205096055	CM037938.1	1
Affx-1205096054	CM037938.1	1
Affx-87986704	CM037938.1	1
Affx-98677767	CM037938.1	1
Affx-88070437	CM037938.1	1
Affx-98680537	CM037938.1	1
Affx-98988310	CM037938.1	1
Affx-98992417	CM037938.1	1
Affx-99003505	CM037938.1	1
Affx-99004019	CM037938.1	1
Affx-98998090	CM037938.1	1
Affx-98998510	CM037938.1	1
Affx-98659745	CM037938.1	1
Affx-98677101	CM037938.1	1
Affx-1205096047	CM037938.1	1
Affx-1205096046	CM037938.1	1
Affx-88036651	CM037938.1	1
Affx-1205096042	CM037938.1	1
Affx-93315466	CM037938.1	1
Affx-1205096039	CM037938.1	1
Affx-1205096038	CM037938.1	1
Affx-1205096033	CM037938.1	1
Affx-1205096032	CM037938.1	1
Affx-1205096031	CM037938.1	1
Affx-1205096030	CM037938.1	1
Affx-1205096028	CM037938.1	1
Affx-1205096027	CM037938.1	1
Affx-1205096024	CM037938.1	1
Affx-1205096023	CM037938.1	1
Affx-1205179489	CM037938.1	1
Affx-1205096021	CM037938.1	1
Affx-1205096020	CM037938.1	1
Affx-517057508	CM037938.1	1
Affx-1205096019	CM037938.1	1
Affx-98997669	CM037938.1	1
Affx-1205096622	CM037938.1	1
Affx-1205096626	CM037938.1	1
Affx-1205096631	CM037938.1	1
Affx-1205096632	CM037938.1	1
Affx-1205096635	CM037938.1	1
Affx-1205096641	CM037938.1	1
Affx-1205096650	CM037938.1	1
Affx-1205096651	CM037938.1	1
Affx-1205096653	CM037938.1	1
Affx-1205096654	CM037938.1	1
Affx-1205096655	CM037938.1	1
Affx-1205096659	CM037938.1	1
Affx-1205094101	CM037938.1	1
Affx-93302144	CM037938.1	1
Affx-1205094102	CM037938.1	1
Affx-99006220	CM037938.1	1
Affx-1205094103	CM037938.1	1
Affx-1205094104	CM037938.1	1
Affx-1205094108	CM037938.1	1
Affx-98674897	CM037938.1	1
Affx-1205094110	CM037938.1	1
Affx-1205094112	CM037938.1	1
[truncated: 44,756 more rows]
